# Supplementary material for: Human G-MDSCs are neutrophils at distinct maturation stages promoting tumor growth in breast cancer
Source: Life Sci Alliance. 2020 Sep 21;3(11):e202000893. doi: 10.26508/lsa.202000893 (PMC7536824; doi:10.26508/lsa.202000893)
Supplement: Supplementary file 1 [file LSA-2020-00893_TableS1.xlsx]

## Sheet: Raw data
Probe.Set.ID	gene.name	S1	S2	S3	HCN1	HCN2	HCN3	HCMo1	HCMo2	HCMo3	BC1	BC2	BC3
8178193	HLA-DRA	3.75379	4.47599	3.72664	6.8856	6.5141	4.86309	11.937	11.9809	11.8498	6.40188	6.97638	7.1525
8177222	CD24	7.35486	7.79058	6.92295	4.65474	4.08737	3.87134	2.21234	2.11715	2.07331	4.94133	4.70122	4.9422
7933574	AGAP6	5.29128	5.69442	5.68229	8.30882	7.95783	4.7916	6.9837	6.93062	7.161	7.36545	7.52584	7.19183
7927353	AGAP9	5.41907	5.85682	5.93335	8.4027	8.16493	4.93116	7.10452	7.05306	7.31374	7.51034	7.57374	7.40794
7933331	AGAP9	5.41907	5.85682	5.93335	8.4027	8.16493	4.93116	7.10452	7.05306	7.31374	7.51034	7.57374	7.40794
8029280	CD177	12.6137	11.2214	12.5709	6.40028	5.86868	6.04669	4.81686	4.75008	4.70586	7.29793	7.29462	8.49802
7927552	AGAP6	5.29106	5.77174	5.72566	8.33284	7.98069	4.97243	7.08591	7.00253	7.24662	7.40322	7.50557	7.21289
8168691	DIAPH2	7.65816	7.31928	7.46991	5.20371	5.20288	5.13567	8.32509	8.31125	8.57136	5.40054	5.70939	6.00203
7933252	AGAP6	5.30125	5.75821	5.83704	8.35859	7.99042	4.5402	7.0905	7.00738	7.23984	7.43726	7.4957	7.2852
8118548	HLA-DRA	3.6061	4.40473	3.71671	6.76552	6.33176	4.84037	11.7449	11.8609	11.7229	6.14063	6.8506	7.01815
7933405	AGAP6	5.32648	5.73641	5.84421	8.29262	7.90426	4.85298	7.07958	6.95086	7.21576	7.3104	7.43827	7.25376
8179481	HLA-DRA	3.66643	4.45938	3.70651	7.04121	6.42616	4.95695	11.8092	11.9163	11.7623	6.27788	6.99073	7.19591
7934451	AGAP6	5.31061	5.84084	5.775	8.16497	7.79585	5.03384	7.04162	6.98744	7.17796	7.19473	7.40979	7.28776
7933427	AGAP6	5.33825	5.90034	5.8493	8.2638	7.92173	5.08976	7.0798	6.97128	7.20511	7.32186	7.42924	7.28594
7927231	---	5.56366	5.58863	5.69182	8.23377	7.70832	4.7049	7.06344	6.71902	6.96436	7.03467	7.40564	7.41413
8125530	HLA-DMB	5.0765	5.21956	4.69219	7.13496	6.38327	5.00727	11.6835	11.9337	11.6425	6.94482	6.89469	7.07834
8180078	HLA-DMB	5.06158	5.19415	4.69708	7.10204	6.33454	5.31804	11.6264	11.8416	11.547	6.96094	6.84274	7.04452
7976621	VRK1	7.59794	7.4131	7.77158	5.97046	5.63215	5.06886	6.63749	6.63966	6.64347	5.90378	6.35593	5.94963
8148270	NDUFB9	8.06207	7.23015	7.16396	5.49533	5.79205	4.97201	8.07138	7.98879	8.04017	5.36284	5.33368	5.55935
7957673	CFAP54	3.58019	3.50038	3.47295	4.49367	4.16095	4.00994	3.44546	3.24054	3.261	4.64165	4.77658	4.68713
8097829	FHDC1	3.53	3.61239	3.58466	4.14489	3.99288	3.95711	3.54295	3.54548	3.21415	4.75214	4.79771	4.65214
8073334	RBX1	9.56608	9.33615	8.99702	7.99078	7.61504	7.28489	9.76937	9.7957	9.83632	7.52907	7.58515	7.94893
8157216	UGCG	7.23285	7.69727	7.95363	5.70239	5.87494	4.21853	4.96971	5.03339	4.7959	5.73339	5.38001	6.05664
8015759	VAT1	7.42706	7.39424	7.04026	5.30016	5.48112	4.61621	6.38387	6.17387	6.72408	5.81996	5.70039	5.87422
7900228	NDUFS5	9.52159	9.02389	8.57429	7.50985	7.24795	5.43071	10.5506	10.3543	10.4354	7.24506	7.18705	7.24506
7990151	PKM	9.31323	8.50019	8.79575	6.53649	6.71738	5.61163	9.17996	9.04799	9.1593	6.35151	6.59492	7.2355
8092849	ATP13A3	7.08665	6.72039	7.02009	4.51152	5.14791	3.96286	6.31366	6.29943	6.26999	4.34299	4.33751	5.33118
8163896	STOM	10.0282	8.93873	9.84307	6.04213	5.40657	3.63926	6.53733	7.00587	6.98683	6.77941	6.58857	7.3798
7900235	MACF1	8.33904	7.1605	8.03599	5.81575	6.08612	5.33634	6.44199	6.39717	6.78267	5.32983	5.75247	5.6347
7950906	CTSC	8.76444	8.72778	8.65572	7.45641	7.54385	5.88204	8.228	8.30457	8.30179	7.49093	7.35937	7.85606
8145293	ADAM28	3.64541	4.13429	3.90619	5.94606	5.51804	4.86505	5.70249	4.70765	5.6063	6.25026	6.16972	5.84493
8101429	PLAC8	11.5866	9.79529	10.2326	5.80709	4.82953	3.93189	8.66731	8.59648	10.043	4.97708	5.5096	6.67724
8083839	GPR160	7.83766	7.75032	8.2282	6.4253	6.4444	4.58762	5.16482	5.58088	5.23993	6.42639	6.29647	6.74292
8166730	CYBB	11.3891	11.044	10.8319	9.11533	8.73014	4.66972	12.0801	11.9622	12.0314	8.51106	9.1529	9.54772
8178802	---	5.05948	4.93169	5.1351	5.84621	5.97717	5.26617	11.2791	11.5123	11.2904	6.1574	7.01716	6.84253
7953385	GAPDH	12.5314	12.4794	12.1664	10.939	10.5715	8.73862	12.225	12.0544	12.3385	11.0498	10.8532	11.2716
7907092	MPZL1	7.39813	6.87481	7.40834	8.58662	8.45143	6.02675	6.57883	6.67673	6.42106	8.74714	8.39868	8.86924
8007441	RPL27	12.2361	11.8606	11.9766	10.9464	10.9887	9.20011	13.0854	12.9827	13.1118	10.828	10.4596	11.0025
7927305	---	5.69375	5.66973	5.47748	7.66967	7.25082	4.93117	6.70725	6.51141	6.72106	6.62974	7.07276	7.06058
7912198	ENO1	11.4385	11.0459	10.7362	8.3752	8.23767	3.64855	11.4895	11.2342	11.4549	8.40674	8.50109	9.54173
8069644	APP	7.72633	6.86356	6.75045	4.88801	5.19102	5.08565	7.88812	7.50291	7.70018	5.36788	5.05786	5.22802
8045695	---	4.74422	4.9982	5.07966	6.59457	6.32685	5.72362	4.64474	4.68091	4.68366	5.92234	5.94516	5.9094
8030383	RCN3	5.56895	6.15228	6.05899	7.08666	7.06916	5.21401	5.90813	5.71296	6.01824	7.17286	7.12735	7.3959
7927536	NCOA4	8.28873	8.70565	8.73303	10.1742	9.85433	6.0849	9.16132	9.13166	8.91009	9.73799	9.74353	9.79937
7971513	ESD	6.94057	6.01805	6.28034	4.4329	4.48371	4.84634	8.04643	7.9842	8.08442	4.18995	4.79642	4.78741
8112409	SGTB	7.93006	7.45118	7.47321	5.92018	6.4741	4.99877	6.64014	6.65427	6.38184	5.99246	5.96972	6.35544
8025278	RETN	11.415	10.9584	9.5773	6.64076	5.72854	5.14709	7.32401	7.21514	6.67876	7.12405	5.96251	7.37296
8038261	GYS1	7.68263	7.27704	7.10131	6.16914	5.77723	5.53805	7.00443	6.9453	7.12666	5.64884	5.99961	6.11314
7988970	FAM214A	6.37503	6.81912	6.92059	8.08718	7.84559	5.06369	6.05115	6.14752	6.13121	7.84333	7.9708	7.78529
7950128	ANAPC15	10.266	9.76478	9.83464	8.44404	8.54611	6.296	9.97475	9.65537	9.74278	8.69998	8.39809	8.87102
8115076	CSF1R	4.70239	5.50614	4.91219	7.29231	7.47429	5.35323	9.83147	9.95826	10.0282	6.43955	7.45519	7.44724
8019796	MAFG	8.36423	8.26	8.36029	7.89214	7.51759	6.37967	8.2225	7.90566	8.48682	6.4237	6.3127	7.15771
8037298	---	11.4932	9.94515	11.3509	4.63336	2.73016	4.30574	2.07902	3.02624	3.36908	4.63051	4.82789	7.14828
8016540	PHOSPHO1	4.85416	7.03335	6.81998	9.97438	10.0559	5.88571	3.54804	3.66484	3.65395	9.46399	9.40717	9.92424
8041000	GPN1	5.09744	5.08215	5.10536	4.60719	4.59574	4.19843	6.84878	7.21581	6.97056	4.09623	4.19824	3.71503
7947147	SVIP	7.24509	7.72314	7.11077	5.70558	5.79795	5.36212	4.40252	4.88577	4.85073	5.79065	5.30706	6.04443
8030498	MED25	6.93602	7.44283	7.20728	8.36382	8.28975	6.43636	6.38657	6.50832	6.50372	8.17955	8.25709	8.60549
8147883	ENY2	8.12458	7.37003	7.78514	6.12311	6.61325	3.64006	7.53918	7.54948	7.53816	6.15576	6.19246	6.51907
8140478	GSAP	6.58178	7.20247	6.5856	5.11968	4.60948	4.55185	7.73211	7.39069	7.44913	5.01846	4.9011	5.49906
8105828	CCNB1	3.55459	3.45684	3.47837	2.739	2.64922	3.34175	2.65583	2.69495	2.74328	2.81854	2.75301	2.74919
7900336	MACF1	6.75127	5.96906	6.11092	4.94912	5.11894	5.46562	5.78104	5.4376	5.62772	4.49796	5.04038	4.66583
8130370	---	8.48867	6.9504	8.33464	4.08357	4.01809	4.25265	4.10898	3.64875	4.67754	5.17396	4.95838	5.46739
8019308	MAFG	7.00845	6.79329	6.85308	6.75498	6.6214	5.62896	6.71441	6.56602	6.92981	5.81079	5.64254	6.06766
8112902	DHFR	5.21122	6.03745	5.4816	3.98948	3.97425	4.08761	4.13291	3.90051	4.35587	4.07157	3.52463	4.16849
8151993	COX6C	10.1131	8.8129	8.81644	6.86901	6.62223	4.89768	10.9922	10.8357	10.9638	6.47469	6.25498	7.36531
8004521	MPDU1	7.49475	6.69336	6.84223	5.8939	5.37261	5.63236	8.697	8.87391	8.98805	5.30216	5.61493	5.49905
7952129	RPS25	10.3022	10.02	9.94194	9.84778	9.86931	5.0697	12.1415	12.0282	11.9311	9.07811	8.97826	9.30534
7960553	MRPL51	8.19744	8.10935	7.83964	7.11003	7.08562	5.20479	8.61736	8.77229	8.66962	5.95279	6.57702	6.9686
8013521	---	5.46571	5.74206	5.98548	6.13707	6.1276	7.92418	5.52391	5.62728	5.35341	6.66972	6.89103	6.74732
8133176	RABGEF1	9.05669	8.51943	8.76564	7.2454	7.54882	4.47566	6.87605	6.72239	6.62268	7.07783	7.05668	7.7661
8036602	ECH1	7.37346	7.35596	6.70833	6.51475	6.39307	5.61417	9.06843	8.82137	8.85471	5.96672	5.68712	5.94041
8163930	NDUFA8	6.44084	5.77249	6.10013	5.02324	4.62726	4.46213	7.43561	7.47197	7.50362	4.94778	4.94696	4.81745
8061186	SEC23B	6.90792	6.47554	6.66622	5.73651	5.86944	4.13685	6.52528	6.15832	6.48717	5.54723	5.59788	5.76196
7901048	SNORD46	6.3601	6.28051	6.39845	7.00854	6.92176	8.01003	6.7196	6.49207	6.56377	7.09865	7.04964	7.17759
8139706	SEC61G	7.51042	6.64942	6.78851	5.6874	5.73274	5.56133	8.13704	8.09384	7.90183	5.44741	5.18993	5.73262
8014755	SNORA21	5.42914	5.99877	5.664	6.9011	7.01442	5.32844	5.40659	5.61102	5.97715	7.06362	6.81409	6.99869
8129097	TSPYL1	3.81886	4.00977	3.80651	5.08567	5.35832	4.18433	3.89716	3.76944	3.49411	4.96897	4.7226	4.95495
8161610	TMEM252	3.62992	3.63698	4.52456	4.95921	5.24638	4.33993	3.67862	3.39557	3.68313	5.30435	5.75103	5.91306
8079733	KLHDC8B	4.9031	4.66066	5.23227	5.31337	5.54946	4.69644	5.37038	5.36711	5.36899	6.01583	6.02138	5.86526
7902382	RABGGTB	4.46885	4.24108	4.35376	3.72974	3.51454	3.37994	6.10316	6.42717	6.42641	3.35187	3.37229	3.54883
8000323	NDUFAB1	6.47481	6.40059	5.90971	5.23166	5.31953	3.48205	8.62094	8.48199	8.55675	4.57036	4.22026	5.19795
7920575	PBXIP1	6.50985	6.70432	6.43489	7.45159	7.61379	6.35726	5.86392	5.845	6.03034	7.59557	7.53233	8.21432
7923378	CSRP1	7.33623	7.28305	7.62751	6.42591	6.60666	6.8251	9.08569	9.00158	8.98731	6.63122	6.34777	6.543
8178811	---	5.08861	5.1452	5.13536	6.02573	6.1376	5.63889	11.5253	11.8543	11.5628	6.47052	8.06902	7.17373
8042207	COMMD1	7.45402	6.68104	6.46938	5.31022	5.2817	5.12912	8.65346	8.50319	8.39495	5.21945	5.15882	5.57228
8180212	---	7.76688	7.43082	7.95586	6.3145	6.52205	4.8683	8.15055	8.24248	7.97836	6.62252	6.42166	6.81036
7994237	LCMT1	5.7762	6.1413	6.02982	5.57346	5.62398	5.80453	6.60844	6.72936	6.73918	5.1745	5.08693	5.23972
8051777	COX7A2L	6.85187	6.72987	6.72035	5.6986	5.76311	3.96624	6.99808	6.84146	6.77138	5.465	5.56579	6.08022
8153258	SLC45A4	5.5254	6.75562	6.11132	7.80567	8.32206	5.70038	4.27108	4.12679	3.99521	7.89016	7.80657	7.95311
7989094	NEDD4	7.13546	5.52936	5.84195	3.95069	3.86781	4.32979	4.29705	4.26688	4.56175	3.76933	3.89426	4.18344
7973936	PSMA6	10.4693	9.6681	9.47066	7.93379	8.25451	6.33257	10.2404	9.97934	9.90594	8.26096	8.3864	8.38193
8121257	PRDM1	6.26837	6.88428	6.83064	8.17904	7.7589	5.09868	5.43461	5.7819	5.51266	7.79933	8.66585	8.32025
7970511	---	2.85448	3.81615	3.11101	5.02408	5.76831	4.42762	3.44657	3.86617	3.87291	4.84487	5.23174	5.00791
8162462	C9orf129	8.31572	8.35293	8.64413	9.14897	9.32351	8.27889	8.91714	9.18425	8.8734	9.25643	9.45802	9.32717
8073522	SREBF2	5.97869	6.28878	5.87189	5.30542	5.44758	5.41173	6.7521	6.54092	6.61756	5.07926	4.89521	5.26795
8147447	PTDSS1	6.81552	6.73871	6.36621	5.54276	5.36899	4.87007	8.53492	8.2332	8.72943	5.43302	5.06988	5.65267
8168873	---	5.62526	5.56526	5.92282	5.12824	4.87485	4.95365	6.25138	5.79118	6.13275	4.63473	4.62289	4.79991
7998931	ZNF200	5.49395	5.91451	6.18336	6.68932	6.65694	5.88873	5.40245	5.38683	5.19743	6.82141	7.0111	7.21764
8022009	METTL4	6.51911	6.3122	6.52578	7.07913	7.04291	5.70522	6.21036	5.9714	6.2575	7.27865	7.14657	7.30741
8180003	---	5.04783	4.95868	5.02773	5.84117	5.97057	5.43778	11.2152	11.5428	11.2674	6.26234	7.82365	6.87865
8131479	MIOS	5.83711	5.86145	5.42124	4.51827	4.8382	4.93057	6.52596	6.59017	6.79913	4.6882	4.54232	4.81378
8120602	OGFRL1	7.94454	8.517	8.38426	9.50864	9.66101	8.06759	8.67241	8.79895	8.45923	9.26361	9.53486	9.27973
7997188	HP	9.99978	9.36022	10.1169	5.71705	3.75626	3.73625	5.58176	6.1636	5.57169	7.0676	6.90444	7.40704
8052654	PELI1	9.85609	9.52014	9.79543	10.6682	10.6774	7.89334	8.52145	8.517	8.16408	10.6766	10.8119	10.5021
7966749	TESC	8.19305	8.07609	7.49649	6.18403	5.53495	5.61456	7.03107	6.92647	7.58261	5.9588	5.37662	6.49086
7967473	EIF2B1	7.18689	6.54716	6.40928	5.27447	5.45003	4.836	8.01539	8.05223	7.94847	5.29011	5.56918	5.63148
8044766	INSIG2	7.54296	6.73489	7.34255	5.66942	5.81606	4.47859	5.91207	6.05479	5.99538	5.26954	5.62111	6.14339
8022640	DHFR	5.43412	6.29374	5.50496	4.13258	4.05277	4.29482	4.30086	3.88531	4.54577	4.27012	3.57778	4.25958
7997192	HPR	6.37267	6.06585	6.17375	5.3325	4.78512	5.09716	4.47674	4.92506	4.61804	5.11198	4.97265	5.21977
7948444	TCN1	9.13146	10.5486	9.87983	6.71513	6.67584	5.2016	3.36772	3.8684	3.40526	7.64752	7.36024	8.25396
8051528	CEBPZ	4.95716	4.50019	4.35814	3.62084	3.81962	4.28967	5.00713	4.8822	5.17107	3.6449	3.39772	3.61593
7951246	MMP8	11.3662	9.97227	10.3885	6.10186	4.11592	3.56876	3.137	2.23888	3.34823	6.96059	5.73664	7.62279
7938777	LDHA	10.3756	8.86918	9.22731	7.18593	6.80198	5.64624	8.3227	8.42207	8.63608	7.47989	6.7366	7.59053
8042259	MDH1	5.86978	5.80314	5.27569	4.68942	4.25549	4.03183	7.59886	7.55366	7.49476	4.47159	4.58941	4.62531
8075106	TPST2	8.76416	7.68809	8.30932	7.21461	6.45226	5.32657	6.43741	6.00284	6.31004	6.38948	6.43869	6.73007
8062444	BPI	9.51022	10.4172	10.1227	7.367	5.7964	5.63828	6.06576	5.85167	5.69693	7.31188	6.91641	8.10291
7963770	GPR84	9.73416	9.3782	8.68039	6.49047	7.80982	4.23925	6.25927	7.11428	6.72063	6.48142	6.60936	7.33451
8089519	BTLA	3.24346	2.95359	3.22407	4.01571	4.26548	4.90001	3.10656	2.87733	3.00001	3.83986	4.24293	4.37136
8180405	---	6.29322	5.76277	6.07477	5.14487	5.58456	4.70233	7.33528	7.47639	7.3571	4.99619	4.83288	5.14246
7901073	UROD	7.0043	6.02373	6.38112	5.82759	5.60021	5.44119	6.90932	6.8605	6.99404	5.14852	5.11173	5.23698
8007715	NMT1	8.74472	8.1192	8.28393	7.32472	7.56513	5.98955	8.62399	8.71127	8.96289	6.83636	7.33097	7.30705
8147483	MTDH	8.22361	7.73746	7.46747	6.53341	6.19211	4.30537	8.09395	8.09361	8.36108	6.72084	6.36813	6.6395
8128683	SNX3	9.09965	8.09912	8.93399	6.85058	6.81345	6.4562	7.73838	7.63998	7.57325	7.02115	7.4328	7.36777
7960874	C3AR1	9.11731	9.43971	10.2528	5.33684	3.83068	4.68634	7.45383	6.42445	7.6106	6.85315	6.58309	7.20021
7907830	QSOX1	9.21647	8.58499	8.38863	7.35992	7.39792	6.31471	7.98473	7.64696	8.19726	7.39078	7.28003	7.54943
8138489	CDCA7L	7.56245	7.0848	7.25611	4.18456	5.06401	5.05233	4.00616	4.29244	4.93283	5.83531	4.88611	5.32345
8015685	EZH1	7.83534	7.83319	8.177	8.80716	8.80755	5.78421	7.66548	7.67905	7.47751	8.7875	8.96477	8.64517
7955908	NCKAP1L	9.9644	9.31286	9.52233	8.17503	7.79345	4.40828	9.47662	9.39692	9.54505	7.7601	8.41004	8.50052
8139859	GUSB	8.43049	8.07431	7.22965	6.63562	6.47276	6.14201	8.45684	8.41101	8.74067	6.28889	6.37755	6.40407
8027621	GPI	9.30295	8.35952	7.62207	5.77558	4.40754	4.83187	7.99068	8.02074	8.38476	5.09735	5.84436	6.06278
8080926	ARL6IP5	9.79876	9.44374	9.69401	8.77565	8.49956	6.39095	9.5167	9.33799	9.64038	8.75937	8.78247	8.84599
7952056	CD3D	2.91707	3.36909	3.32544	5.43603	5.3631	3.88495	3.7534	3.24898	3.68646	4.07077	4.66357	4.6432
8001924	FAM96B	8.77077	8.63281	8.65732	8.25014	8.12172	6.84896	9.60733	9.52542	9.51321	7.95767	7.92298	8.13588
8093191	DLG1	4.80476	4.97186	4.61408	4.54704	4.19944	3.91594	6.09588	5.59514	5.75298	3.70784	3.71306	3.9171
8138224	NDUFA4	8.5234	7.5234	7.27299	5.86797	5.82071	3.62579	8.44216	8.67057	8.66847	6.02036	5.45327	6.28296
8053733	KMT5A	8.59821	8.07978	8.13614	7.45921	7.61114	6.16224	7.32176	7.03562	7.34059	7.25389	7.21417	7.41831
7988077	LCMT2	4.63926	4.52666	4.28802	5.651	5.69514	4.27384	4.81403	4.88689	4.51251	5.43779	6.30498	5.61713
7923562	CHIT1	6.33611	6.97432	7.18698	4.55471	4.26804	3.32854	3.47846	3.68455	3.48552	5.44329	4.66866	5.56363
8174051	BTK	6.54667	6.44435	6.73803	5.61784	5.64794	4.96458	6.9138	6.76398	6.60964	5.41773	5.63861	5.91079
8091676	---	5.04677	5.87839	5.08775	7.81808	7.62386	6.73401	4.74644	5.22867	4.70917	6.8306	6.77272	6.57289
8090630	TMCC1	5.72154	6.81335	6.3328	8.24598	8.06011	5.47239	5.76217	5.50148	5.52518	7.47061	8.30734	8.3168
8147172	CPNE3	9.00154	9.33928	9.13609	7.69114	6.97835	5.60899	7.78502	7.99463	7.91628	7.65713	6.90644	8.016
8178590	DDAH2	9.05417	8.05001	8.4682	7.32502	7.10609	4.57831	6.56755	6.61802	6.58405	7.01236	7.32063	7.27856
8179819	DDAH2	9.05417	8.05001	8.4682	7.32502	7.10609	4.57831	6.56755	6.61802	6.58405	7.01236	7.32063	7.27856
8030360	SNORD32A	9.46246	9.28348	9.33662	10.0982	10.3473	8.91058	9.28196	9.02453	9.1515	10.3528	10.8363	10.121
7941255	TIGD3	5.08288	6.03494	5.33951	7.50935	7.48462	5.68079	5.14323	6.03209	5.91606	7.17188	7.06366	7.93335
7971134	PROSER1	7.43046	6.16439	6.45109	4.81944	5.07217	3.91332	7.22622	6.83482	7.23756	4.95918	4.7567	5.18789
8019762	P4HB	9.73033	9.91713	8.91021	8.78333	9.1949	8.50378	10.2519	10.066	10.0353	8.17192	8.10996	8.09544
8139840	ERV3-1	8.77824	8.91688	8.58781	10.2304	10.2465	6.41717	7.47938	7.55026	7.17834	9.54963	9.74158	10.1853
7949518	FIBP	7.59042	6.79347	7.243	6.00759	5.99349	5.32843	7.72855	7.55794	7.67008	5.71135	6.19822	6.13308
8053417	CAPG	9.64036	8.26068	9.11702	6.50601	6.13401	5.08313	9.35027	8.5877	8.8394	6.67258	6.81001	7.41641
8058695	BARD1	4.66447	4.77788	4.83687	3.02204	3.27321	3.93222	4.39534	4.80875	5.06472	3.34142	3.90705	3.56235
8022393	PTPN2	6.30487	5.87897	5.56626	5.06218	5.25852	5.19823	6.58221	6.64253	6.57358	4.83167	4.96614	4.90807
7974190	---	6.79876	6.34822	6.25744	5.33054	5.59727	4.29988	7.91715	8.23088	7.85576	4.50385	4.33391	5.50927
7915091	MTF1	9.18276	9.1667	9.72936	8.36767	8.69937	5.94432	8.28877	8.15201	8.08707	7.84757	7.81107	8.51646
7940869	FERMT3	10.0236	9.65008	9.67026	9.07868	8.98329	6.77502	9.01424	8.76776	9.16896	8.29011	8.53277	9.02218
8175947	HCFC1	6.69963	6.5161	6.46188	5.52984	5.84275	4.70119	8.43588	8.20931	8.58773	5.81159	5.36568	5.64823
8044804	DBI	7.1183	6.95755	7.0953	6.19302	6.36599	4.69599	7.47136	7.24188	7.43827	6.47544	6.21956	6.10126
8001496	NUDT21	6.42024	6.02631	5.7383	5.44109	5.0511	4.04292	6.13893	6.21501	6.38176	4.72185	4.88061	5.14732
8042211	B3GNT2	8.34103	7.85814	8.47504	7.58159	7.72912	6.36397	7.20072	7.36163	7.44618	7.3316	6.42704	6.85328
8023920	TXNL4A	6.62708	6.4533	5.90449	5.30184	5.07298	5.3816	6.91166	6.9308	7.23415	5.05308	5.16105	5.36345
7988644	ATP8B4	7.6745	7.31938	7.92299	5.62671	5.36125	5.53913	5.62329	5.76677	5.68609	4.91707	5.96655	6.40963
8150599	PRKDC	4.23332	4.63789	4.50377	4.87297	5.0378	4.48167	5.23635	5.12101	5.22621	5.77873	5.12156	5.77326
7919778	---	3.42612	4.71383	4.41631	6.44994	6.53807	4.58022	4.08953	3.76606	4.18705	7.3694	6.28458	5.85799
8042830	MTHFD2	5.61252	6.01259	5.65013	3.87628	4.20393	5.32151	5.66028	5.80553	5.52538	4.90465	3.80488	4.05759
7963911	CD63	11.9281	11.7594	11.956	11.2016	11.1477	9.58385	10.9506	10.9585	10.996	11.0753	10.9642	11.3582
7946275	GVINP1	4.42666	4.99882	4.78523	5.92827	5.04702	3.83074	4.74147	4.85687	4.65949	6.21441	5.87823	6.07381
8092409	PARL	8.35696	7.68542	7.75442	7.21556	7.26622	4.89542	9.04428	9.04496	9.00634	5.94241	6.55404	6.95292
8125048	DDAH2	8.98899	7.98353	8.43456	7.3252	7.11299	4.57213	6.53012	6.56949	6.57943	7.07713	7.28563	7.28166
7968297	POMP	8.78437	8.50882	8.55983	7.80124	7.76771	7.07082	8.35416	8.57255	8.4086	7.96053	7.90462	7.92631
8071920	SNRPD3	8.25453	8.34294	7.94704	7.86322	7.45694	7.34293	8.92186	8.73026	8.73398	7.35298	7.21149	7.34223
8165974	CLCN4	3.86577	4.30752	4.0457	5.30025	5.49352	3.66259	4.05078	3.8144	3.62745	5.35758	4.86329	5.64727
7988605	COPS2	6.65913	6.34123	6.18928	6.24489	6.04323	4.24781	7.35462	7.47385	7.14609	5.43267	5.29642	5.64861
8112967	TMEM167A	8.06751	7.65977	7.92548	6.72637	6.41822	3.31042	7.67069	7.94268	7.67297	6.95249	6.6083	7.09726
7990211	HEXA	6.57744	6.26582	6.18868	5.15188	4.74766	4.60722	7.74105	7.28089	7.36492	4.56967	5.20063	5.34585
7968928	TPT1-AS1	6.11238	5.67334	5.58254	4.43427	4.81172	3.78768	4.93794	4.65794	4.67075	4.42975	4.72691	4.92076
8107164	PPIP5K2	7.27014	7.06249	7.20563	5.95384	6.56516	4.24719	6.87173	6.81198	6.77374	6.08513	6.1743	6.41553
8085062	IL5RA	2.5929	2.79057	2.49156	4.50417	4.0195	3.79265	2.79582	2.75006	2.57943	3.86785	5.65433	4.57605
7905881	ADAM15	7.38819	7.25306	7.11754	6.36942	6.67463	5.43995	7.53928	7.46591	7.38903	6.59025	6.42557	6.53156
7968242	GTF3A	7.49995	7.26985	7.67451	6.30477	6.27649	5.86221	8.38256	8.45345	8.35174	6.79312	6.30772	6.68979
8117476	BTN3A3	4.27633	5.79195	4.93455	6.81722	7.11664	4.63909	6.19721	6.52103	6.61849	6.82459	7.09622	6.60881
7939137	EIF3M	8.04152	6.91092	8.06662	5.77695	6.22865	4.40851	10.073	10.1395	10.0167	6.12102	5.37314	6.12109
8165642	TMEM203	6.47833	6.554	6.18979	5.70873	5.25633	4.50467	7.76591	7.721	7.87251	5.13368	5.17208	5.70244
8160581	TOPORS	5.4655	6.66646	6.44189	7.46202	7.56954	5.18676	5.45229	5.49156	5.61392	7.58058	7.89525	7.59136
8082012	SLC15A2	6.63518	5.96899	6.61095	4.74335	4.78145	4.30752	6.26956	6.43958	6.59452	5.16307	4.66565	5.45569
7959574	KMT5A	8.01849	7.6003	7.63438	6.80163	7.07795	5.56	6.83277	6.53689	6.82909	6.88335	6.73606	6.96091
8115524	CLINT1	8.6849	7.73509	7.62038	6.89779	6.96102	5.47488	8.1362	8.25451	8.29697	6.71738	6.37514	6.7304
8153262	SLC45A4	6.28081	7.39667	6.59286	8.29237	8.94393	5.14592	4.96463	5.66024	4.73275	8.57082	8.41027	8.7112
8178884	HLA-DMA	5.14862	5.69068	5.38174	6.98773	6.87338	4.47177	10.6473	10.8549	10.9028	6.38617	6.22458	6.85898
8180086	HLA-DMA	5.14862	5.69068	5.38174	6.98773	6.87338	4.47177	10.6473	10.8549	10.9028	6.38617	6.22458	6.85898
7921344	---	4.15999	4.43112	3.80138	3.46587	3.59535	2.32075	2.78239	3.56611	3.10669	2.76996	2.69909	3.11254
7917906	RPL7	9.05332	9.09002	8.41122	7.93326	8.02376	6.57691	10.8938	10.9938	10.6581	7.76018	7.37967	7.90754
8020100	RALBP1	7.58613	7.49952	7.82375	8.6436	8.63636	5.64116	6.50153	6.65989	6.81494	8.29448	8.48168	8.37116
7902822	PKN2	7.18337	7.97964	8.02153	9.21774	9.23034	4.88492	7.33306	7.56905	7.36804	8.73755	9.04028	8.97646
8048717	SGPP2	4.44176	4.69146	4.25221	3.52449	3.44323	3.95987	3.64382	3.47729	3.56769	3.65238	3.81022	3.65662
7999217	ROGDI	8.57261	7.30016	8.07982	6.05984	6.14621	6.44544	8.10077	8.62114	8.07201	6.41441	6.24825	6.52047
8107750	PRRC1	6.25664	5.9022	6.00805	5.61006	5.3888	5.68583	6.66841	6.3359	6.55767	5.39781	5.10266	4.98266
8144719	---	2.43906	2.57154	2.70892	1.49577	1.45244	2.1011	1.70279	2.03216	2.40634	1.67835	1.6387	1.51028
7917604	ZNF644	6.04703	5.25901	5.29594	4.5637	4.63195	4.00386	6.30843	6.619	6.77036	4.38896	3.85069	4.38653
8005829	---	4.77815	4.61726	4.57503	4.34735	4.56566	4.40225	4.61856	4.71709	4.08745	3.23402	3.25834	3.88451
8132725	UPP1	8.82435	7.1851	7.99155	5.0544	4.89342	4.31509	6.37442	6.48103	6.66765	6.27664	5.54404	6.23939
7967879	---	6.81943	6.36458	6.52003	7.33261	7.33223	6.16855	6.88121	6.69044	7.10221	8.83171	7.66127	7.8249
8116520	GNB2L1	10.9974	10.752	10.2303	9.68023	9.61154	6.51996	12.526	12.5302	12.5051	9.4709	9.23098	9.83302
8015039	SMARCE1	8.03061	7.80265	7.92386	6.95747	7.18895	5.86567	8.39415	8.25665	8.50089	7.16596	7.26838	7.25598
8122336	ABRACL	6.20382	5.79167	6.15685	4.54297	4.63494	5.26859	6.36567	6.62568	5.86258	5.09518	4.49945	4.86967
8028172	CAPNS1	9.04761	8.20571	8.7459	7.51266	6.93929	4.58093	9.15583	9.14316	9.0736	7.54633	7.13765	7.51164
8156167	NAA35	4.95606	4.88899	5.38721	4.24132	4.56896	4.27503	5.79235	5.97731	5.9563	3.85576	4.15606	4.29506
8126542	ZNF318	6.10347	5.248	5.21075	4.86162	4.66263	3.7592	5.97522	5.40682	5.64721	3.94346	4.07812	4.37976
7954196	MGST1	5.26092	4.33572	3.93746	2.72287	2.9015	3.18795	6.02511	5.86363	5.49926	2.622	3.02121	2.95138
7989315	GTF2A2	7.2404	6.63267	6.79987	5.96625	5.6691	4.44762	7.0088	7.26418	6.88855	5.78753	5.97066	5.94754
7941961	ALDH3B1	8.22829	7.7235	8.17973	6.81915	7.20396	6.75947	7.81343	7.95039	8.13692	6.85375	7.21343	7.06212
8138045	EIF2AK1	7.87035	7.6343	7.45595	6.92052	6.76286	5.40756	7.98391	7.94234	7.98222	6.8772	6.83885	7.0425
7993467	NDE1	7.42608	8.17417	8.02177	9.16997	9.14976	5.89932	7.51921	7.49126	7.34048	8.7032	9.03753	9.10482
7906107	SEMA4A	9.43056	9.09789	9.34395	8.29124	8.08615	5.38119	7.53944	7.63244	7.54471	7.9412	8.38202	8.62377
8016745	SPAG9	6.65053	7.39027	7.27192	8.22066	8.315	5.79792	6.27422	6.1432	6.01922	7.99489	8.15919	8.33791
7978824	RPS29	4.93891	4.70394	4.66063	4.3758	4.3865	4.31432	6.28428	6.55239	6.27006	4.12829	3.97207	4.07619
8112746	WDR41	8.17526	7.40646	7.5909	6.2495	6.44836	4.81861	7.96812	7.73701	7.79042	6.18256	6.80455	6.58477
8005223	---	4.25728	4.27762	4.33982	4.6223	4.53158	3.69106	4.42215	4.33712	4.48489	4.91669	4.86173	4.82038
7955943	PDE1B	6.88168	7.1552	7.17293	6.34942	6.2948	5.00329	6.98823	6.16442	6.08429	5.52972	5.98658	5.85775
7970262	CUL4A	5.72701	5.84973	6.01602	5.45495	5.4854	4.66775	6.6722	6.22796	6.5311	4.64754	4.98896	5.17056
8156295	SECISBP2	6.89592	7.28165	7.0571	7.89351	7.87422	6.19508	7.22256	7.21781	7.14458	7.78939	7.71471	8.13214
8139712	VOPP1	7.58871	7.88607	7.60489	7.19134	6.88394	6.16178	6.36068	6.16673	6.10686	6.78287	6.53564	7.04344
8020058	NDUFV2	7.5932	7.93645	7.65154	6.79232	6.86523	5.67975	8.42669	8.47182	8.60406	6.83045	6.90603	7.16257
8137414	NUB1	6.49662	6.88079	6.81563	7.02786	7.47711	5.18463	6.70881	6.88349	6.86531	7.58166	8.22996	7.66114
7969288	OLFM4	8.20847	10.7015	10.3413	5.71052	5.7951	4.23106	3.1722	3.64118	3.32419	7.33994	6.57533	6.4959
7923753	NUAK2	6.55069	6.54536	7.03108	7.64234	7.43403	4.57356	5.31908	5.59031	5.59259	7.41868	7.78143	7.82986
8009761	NUP85	6.13156	5.9317	5.7367	5.55964	5.87652	4.44524	7.19037	6.75743	7.16518	5.09086	4.87969	5.09357
7974303	TMX1	7.06885	6.79323	6.52099	5.35442	5.50654	3.58616	7.82267	7.78734	7.36023	5.49819	5.91469	5.86327
8050763	PTRHD1	6.24802	6.26408	6.18347	5.53287	5.33656	5.57769	8.05088	7.71391	7.93139	5.55317	5.08477	5.52176
7912670	UQCRHL	9.13526	8.76102	7.9006	7.38273	7.75782	5.7832	9.85104	10.0351	10.16	7.27418	6.84807	7.12472
8154953	PHF24	3.82712	3.84662	3.74571	4.4389	4.81828	4.77606	3.74313	3.73324	3.57597	4.73691	4.44558	5.11999
8106303	POLK	5.87754	5.56577	6.04535	4.84501	4.90582	4.86297	6.36252	6.58576	6.57501	4.63798	5.11868	5.00227
8042468	ANXA4	6.1915	6.27668	6.36635	4.05272	4.81616	3.67052	6.82802	7.18478	7.25163	4.12558	4.21837	5.35262
8053533	IMMT	5.72668	5.65939	5.31017	4.83075	4.75792	4.21925	7.12594	7.08625	7.268	4.88201	4.8682	4.58974
8125537	HLA-DMA	5.21415	5.67094	5.39702	6.97733	6.7843	4.42989	10.4962	10.75	10.784	6.30654	6.17407	6.74706
7965480	PGAM1	10.1028	9.74638	9.55071	8.81334	8.72252	5.86225	9.47938	9.54825	9.66429	8.63166	8.69398	9.15854
8163908	GGTA1P	5.41822	6.4577	5.691	3.80388	3.96382	4.43042	5.91869	6.02232	5.76414	4.20198	3.40454	4.6746
8162264	AUH	5.50228	5.46492	5.31351	4.68826	4.7929	4.96455	4.88118	5.16188	4.76624	4.76631	4.67641	4.73642
7903703	GNAI3	8.48546	8.80244	8.45337	8.15859	7.9117	5.03703	7.27729	7.41599	7.38797	7.58932	7.80037	7.96489
7909400	CD46	9.77943	10.1548	10.2777	10.8589	10.8725	8.37438	9.30115	9.25568	9.09577	10.8419	10.8508	10.8037
7975793	BATF	7.50588	7.36168	7.31622	5.92748	5.50579	5.60238	6.22707	6.1255	6.60439	6.17441	6.20857	6.7027
7918703	AP4B1	7.25796	6.14887	6.49227	6.01838	5.95594	4.40064	6.66017	6.36293	6.19827	5.22552	5.45109	5.17554
7983843	TCF12	6.49746	5.89808	6.57472	5.30466	4.73364	3.74715	7.99123	8.07509	7.96518	4.89501	4.71997	5.45053
7948455	MS4A6A	10.0188	8.6854	10.1048	6.59882	6.75927	5.85607	10.8714	11.1327	10.8276	7.88466	8.07418	7.51829
7987869	TMEM87A	6.6512	6.12736	6.23721	5.49755	5.2515	3.99983	6.71195	6.7774	6.5512	5.33089	5.21177	5.6575
7981481	C14orf2	9.931	9.50005	9.71021	8.68935	8.76252	7.38006	9.71206	10.0654	9.73176	8.82044	9.03072	8.86454
7990632	PEAK1	7.19276	6.78865	7.45739	5.85864	6.06559	4.21852	6.77804	6.9741	6.73815	5.90114	6.33306	6.20483
7939150	PRRG4	6.68041	7.37244	8.15888	8.4955	8.8963	7.23505	7.09253	7.36204	7.68877	9.01905	9.18276	9.11986
8001666	CSNK2A2	7.13469	6.5454	6.73	5.18268	5.16584	3.89941	7.72086	7.58194	7.85172	4.66148	5.67252	5.73755
8173729	PGAM4	9.90294	9.54823	9.3146	8.60501	8.55972	6.50977	9.27223	9.35787	9.46123	8.48137	8.56481	8.93167
8176282	PGAM4	9.90294	9.54823	9.3146	8.60501	8.55972	6.50977	9.27223	9.35787	9.46123	8.48137	8.56481	8.93167
8063242	ARFGEF2	5.36197	4.9765	4.73032	4.00354	3.83622	4.26978	6.5816	6.68082	6.66201	4.14945	4.01742	4.28394
7919800	CTSS	9.95156	10.4422	10.6706	11.2089	11.3558	7.85851	11.5305	11.8658	11.561	11.1995	11.4715	11.4168
7952869	THYN1	6.72257	6.53171	6.66875	5.68143	5.49348	6.45361	7.09224	6.62594	6.83747	5.90208	5.53306	5.92436
7928551	RPS24	7.06606	6.28996	6.17979	5.49629	5.58743	5.13784	7.05753	7.09446	6.81323	5.06537	5.4176	5.46222
8010139	SEC14L1	8.37379	8.8764	8.7244	9.84941	9.5915	7.14004	6.66324	7.06172	7.00652	9.4192	9.70511	9.59837
7902848	---	7.68338	8.46148	8.432	9.76385	9.68499	7.40022	7.67943	7.88435	8.04787	9.10721	9.41032	9.43135
8115978	UIMC1	7.08959	7.32898	7.43659	7.96265	7.63599	5.26403	6.54341	6.55856	6.35836	7.92765	8.05844	8.21957
8111153	MYO10	5.8239	5.12336	5.98541	4.27961	4.03928	4.79481	4.38016	4.40749	4.24162	4.72897	4.41163	4.40603
7955419	---	7.77993	8.12308	7.657	8.62011	8.6302	5.6663	6.16059	6.21646	6.39402	8.55039	8.56692	8.82159
8145365	DOCK5	8.27461	8.80693	8.61233	9.51297	9.40564	7.20206	7.20126	7.35164	7.22138	9.22762	9.38145	9.4566
8056060	BAZ2B	8.08915	8.66665	9.11415	9.72009	9.94018	7.02915	8.02441	8.07655	7.86726	9.58214	10.1169	10.0538
7958152	PGAM1	9.96833	9.6297	9.40714	8.65505	8.58676	6.00162	9.34583	9.41648	9.54123	8.49006	8.56108	9.04031
7929624	PGAM1	9.96743	9.62863	9.41588	8.67491	8.60271	6.18533	9.34654	9.40747	9.5288	8.5019	8.5852	9.04906
8135250	PSMC2	6.31472	6.06194	5.61622	4.69407	4.05129	5.22277	7.33102	6.92596	6.95275	4.06676	4.12981	5.06314
8136631	SSBP1	7.63712	7.48106	6.87851	6.38888	6.26084	6.28153	8.82917	8.82335	8.83212	6.36387	5.70728	6.35739
8034871	---	6.57148	7.66897	7.30082	8.79573	8.64466	7.38025	6.41667	6.3709	6.08151	8.31705	8.52866	8.53113
7974352	C14orf166	7.75444	7.44408	7.23137	6.60148	6.42526	5.90745	8.96085	8.96634	8.55064	6.51474	6.51772	6.7106
8029914	C5AR2	7.28967	7.18159	7.46382	7.9656	8.29212	5.51586	5.04354	4.90917	5.43385	8.07743	8.16322	8.29632
8005951	SNORD42B	6.86718	5.69656	6.5145	7.73781	7.94854	6.17353	7.23872	7.02407	7.00793	8.04004	8.38583	7.43767
8130539	TAGAP	7.53729	8.51215	7.57356	9.00625	9.31395	5.44376	7.28262	7.52193	7.10015	9.18428	9.30277	9.04658
7897236	KCNAB2	9.4507	9.2486	9.31492	8.85346	8.99608	6.27294	9.62343	9.61966	9.55897	8.57485	8.4947	8.88076
8166335	PDHA1	7.71606	7.73296	6.90632	6.67601	6.54447	5.81692	8.02148	7.51375	7.81449	6.02032	6.04565	6.49486
7907911	CACNA1E	7.92816	7.2432	7.3062	6.24042	5.96252	4.95736	4.38801	4.73303	4.23662	5.71727	6.20689	6.56653
8116969	NOL7	8.13106	7.1179	7.63952	6.18382	5.68985	5.01212	7.56086	7.47899	7.26876	6.36864	5.98208	6.52115
7990033	TLE3	8.29769	8.4834	8.47173	9.03664	9.03785	5.46647	6.73765	7.02363	6.89158	8.90813	9.21914	9.24162
8014248	SLFN13	6.14476	6.29336	6.43116	5.09042	4.62171	4.87225	4.74876	3.60579	4.52876	4.44983	4.84488	5.07702
7928300	ANAPC16	8.17141	7.93425	7.80388	7.21374	7.14389	5.12409	8.26319	8.30104	8.17035	7.37884	7.05744	7.32785
7958692	TCTN1	4.7563	4.97042	4.70164	5.41117	5.452	5.41819	4.88776	4.72782	4.8605	5.84676	5.35054	5.52813
8008900	CA4	8.68042	7.84609	8.80311	6.75944	6.9872	4.60455	4.34807	4.29244	4.53846	7.40076	6.90965	7.24725
8134740	LAMTOR4	8.84538	9.03389	9.44316	10.0723	10.2777	8.16183	8.78132	8.92387	8.74765	9.91947	9.96942	9.88944
8168412	JPX	4.56585	5.57656	5.55294	5.99383	7.16747	4.63746	4.84795	5.00964	5.64696	6.87885	7.42157	7.11725
8093576	SCARNA22	5.54721	5.56017	5.89106	6.0248	5.96408	4.75591	4.93706	4.86618	4.86162	6.24631	6.35304	6.32431
8116867	TMEM14B	7.3411	7.02354	7.039	6.30273	5.68218	4.64606	7.96929	7.9435	7.91515	5.91289	6.38189	6.21956
7926836	RAB18	8.54632	8.43103	8.54213	8.22426	7.9475	4.98826	7.09558	6.73669	7.08837	7.75454	7.85391	7.79286
8129693	---	3.28849	6.46248	3.76939	9.57308	9.41283	8.52277	4.40148	3.46615	3.43634	7.57201	9.07714	8.12096
8025285	MCEMP1	10.1294	8.36477	9.2433	6.53841	6.51609	5.13615	6.77874	6.89634	6.3681	6.70963	6.67072	7.78908
8097679	LSM6	7.88599	7.07515	8.16112	6.58623	5.93567	4.72833	7.74844	7.96092	7.55011	6.09449	5.39858	6.45559
8005097	HS3ST3B1	6.25902	5.12362	5.84774	4.63333	4.76562	4.71604	4.0979	4.15781	4.1615	4.54146	4.42621	4.60441
7942832	DDIAS	5.38747	4.85226	5.43685	3.85713	3.81267	4.24095	4.62794	4.5554	4.82071	4.01424	4.49776	4.30995
7939546	CD82	9.31268	9.28718	9.22445	8.47831	8.28924	6.40042	6.35027	6.51127	6.50579	7.56101	8.40794	8.4892
7943240	PIWIL4	5.21778	6.65428	5.4893	4.13558	4.19005	4.65574	5.42174	5.31851	5.03006	3.6517	3.93134	4.48691
8111796	PRKAA1	7.46928	6.82066	7.32322	6.29029	5.92996	4.44257	6.35625	5.94509	6.08254	5.96408	6.05553	6.40942
8151376	RPL7	9.06734	8.97511	8.32798	7.96044	8.04512	6.39381	10.9196	10.9767	10.7087	7.8254	7.41197	7.91274
8064879	TRMT6	8.18597	6.84429	6.67518	5.20753	5.50616	5.85056	7.27397	6.83481	6.93974	5.22664	5.52906	5.66205
7988753	SPPL2A	7.7353	7.6761	7.52731	6.66152	6.4668	4.05572	7.0245	6.51221	6.82486	5.76244	6.33018	6.91294
8120251	FBXO9	8.59994	7.82373	8.16323	6.74166	6.47882	5.66618	7.20534	7.15662	7.63366	6.5807	6.27978	7.34196
8103222	RPS3A	8.50473	8.56387	8.18926	8.0623	8.23168	3.7534	9.72842	9.78377	9.59722	7.54231	7.5243	7.88559
8109222	RPL7	8.87999	8.90161	8.23007	7.92881	7.8245	6.52732	10.8003	10.8159	10.5299	7.51923	7.11751	7.8743
8065403	CST3	6.77406	7.90746	7.61163	8.9311	8.58336	6.44894	11.0746	11.0947	11.2731	8.73738	8.5699	8.89841
8029065	BCKDHA	8.79715	8.29889	8.23011	7.68795	6.81576	5.84469	9.40361	8.82052	8.94596	6.8837	6.91202	7.41181
7937020	MKI67	4.14032	5.19462	4.0609	3.49314	3.09078	3.30197	3.17697	2.81998	3.25298	3.08913	3.14833	2.84784
8122136	RPS12	8.46165	8.18559	7.732	7.37366	7.50084	6.46079	10.0701	10.2771	9.93516	6.90186	6.77299	7.3962
7946728	PSMA1	8.055	7.33163	7.62485	6.93296	6.61153	4.1165	8.50352	8.59025	8.48067	6.64939	5.89615	6.73063
8034313	HNRNPA1P10	7.04181	6.99622	6.24823	6.0664	5.9056	5.39784	9.18925	9.21315	9.36239	5.825	5.60618	5.79956
8039068	NDUFV2	7.81529	8.20871	7.87362	7.21283	7.01038	5.40586	8.67809	8.76281	8.93557	7.02125	7.06383	7.40123
8080100	RAD54L2	5.74833	5.32418	5.71181	5.02904	5.1572	4.62024	6.4364	5.95763	6.3763	4.8127	4.68354	4.77669
7908841	PPP1R12B	5.47753	6.12162	5.65819	7.14391	7.07017	5.64485	5.19761	5.43504	4.8334	6.68161	6.72081	7.20953
8070160	ATP5O	9.13995	8.53641	8.5118	7.77959	7.67729	5.43114	10.007	9.94096	9.91474	7.30509	7.07839	8.04037
7969428	UCHL3	5.63505	6.0835	5.24159	5.11818	4.9248	4.32936	7.41261	7.7401	7.53946	4.16125	4.4192	4.84135
8135718	ING3	6.17137	6.71823	6.49824	7.29075	7.0749	5.57581	6.89985	7.46572	7.25291	7.38749	7.35353	7.37505
7989387	VPS13C	5.93931	5.38421	5.63311	4.70268	4.56713	3.89401	7.06989	7.10135	7.12136	4.58128	4.81797	5.03785
8086125	TRANK1	5.80655	7.08308	7.52088	8.26135	8.8484	4.92451	5.27705	5.89333	5.40137	8.51415	9.07567	8.75702
8073612	TSPO	10.1905	9.35815	9.35989	7.98424	7.68172	4.97649	8.79421	8.55332	8.89362	8.33079	8.10925	8.72798
8125436	HLA-DRB5	2.92861	2.84327	2.71625	2.77815	3.17617	3.18974	9.52703	9.65728	9.44035	3.47923	3.46328	3.66082
7938592	FAR1	8.69601	8.37128	8.52842	8.02409	7.71874	5.74173	7.93433	8.05065	8.02103	7.40409	7.54656	8.01333
8045287	---	4.74066	5.55278	5.58897	5.97421	5.87176	6.82549	5.21979	5.30263	4.83249	6.29478	6.77697	6.43838
8084064	---	3.96268	4.15113	3.96916	3.40571	3.51414	4.23509	3.91498	3.31592	4.37446	2.79432	2.99781	2.88471
7909815	IARS2	6.80989	5.85697	6.74995	5.41585	4.75226	4.58036	6.42241	6.01226	6.45984	4.71598	5.01131	5.32449
7931216	FAM175B	6.23428	5.71735	5.99446	5.94466	5.3894	3.53759	6.87724	6.60631	6.47282	4.83426	4.99603	5.16409
8022814	HNRNPA1	6.65296	6.67821	5.88242	5.76968	5.57447	4.93177	8.84805	8.8743	9.09312	5.43954	5.26571	5.41724
8143028	CHCHD3	6.04263	5.23392	5.16777	4.44146	4.92655	3.20578	8.12677	8.17168	7.74473	3.92566	3.80983	4.52777
7955376	DIP2B	7.97876	8.15414	8.17221	8.72119	8.74424	6.64971	6.87636	6.88185	7.0432	8.56069	8.81127	8.74447
8177951	HCG27	7.76387	7.34472	6.97289	7.51349	7.65726	5.92205	5.01637	4.9191	5.38259	8.52642	8.28655	8.33661
7940775	RARRES3	3.94671	4.92333	4.59255	5.22424	5.3254	3.64627	6.04099	6.39363	6.5209	6.00379	5.85701	5.41469
8117447	BTN2A2	5.8059	5.99022	6.11409	6.92602	7.05649	5.02685	6.43989	6.22972	6.68337	6.53444	7.12294	6.98923
8030525	PTOV1	6.11686	6.2116	6.18261	6.85727	6.78198	4.97767	6.03871	5.94472	5.95948	6.61713	6.69893	6.80479
7942679	ACER3	8.62376	6.06132	7.06292	4.43372	3.99818	4.63243	7.31753	6.72216	7.41654	4.31325	4.46306	5.02699
7919193	NUDT4	8.60398	8.58526	8.73985	8.17586	7.3639	6.95347	8.86395	8.84029	8.9563	7.65972	7.82972	7.64775
7971950	DACH1	7.48916	5.86823	7.23906	4.41876	4.82976	5.93641	4.06759	3.8757	4.20899	5.01384	4.98456	5.2825
7903980	C1orf162	10.0041	8.17139	9.01399	5.99421	6.88708	5.01501	8.93454	9.14771	8.86785	7.40015	6.58411	6.91873
8011884	NLRP1	7.13447	7.77763	8.38939	9.10632	9.11834	6.67751	8.35565	8.29495	8.54615	8.91631	9.2383	9.0684
8069085	TRPM2	6.52474	5.5959	6.34042	4.66896	4.83204	5.0538	5.52131	5.30765	5.74938	5.03078	5.12765	4.91908
7920697	GBA	9.22349	8.71402	9.28576	8.21092	8.25244	6.54233	7.75109	8.05767	7.83425	7.40281	7.99361	8.3143
8148694	GRINA	9.20941	9.24956	9.29699	8.0858	7.45114	7.02087	8.25412	8.42679	8.53887	8.10723	7.98368	8.62027
7930320	CFAP58	3.6561	4.40794	4.02174	4.04327	4.72603	4.3366	3.19562	3.04648	3.24704	4.90233	5.64414	5.33482
7973185	RPGRIP1	3.25355	3.73642	3.97851	4.60597	4.70106	3.97766	3.68389	3.68941	3.61757	4.62921	4.34627	4.77222
8019250	P4HB	8.76831	8.63827	7.92216	7.88815	8.0646	5.8989	9.21203	9.11515	8.98861	7.22064	7.16327	7.63612
8113083	FAM172A	8.56029	7.82642	7.90163	6.97895	6.47704	4.32941	6.99142	6.86033	6.77146	7.00448	6.49821	7.17925
8049016	PSMD1	6.98046	6.16294	6.09203	5.68594	5.41894	4.28012	6.54804	6.32163	6.67573	4.94177	4.82432	5.54672
8054364	TGFBRAP1	5.60321	6.29772	5.57601	5.04722	4.74304	4.50689	6.46342	6.68265	6.82215	4.93851	4.78665	4.73509
8146448	MRPL15	4.30329	4.12862	4.17975	3.65239	3.74514	3.85734	6.43734	6.02719	5.79627	3.47943	3.44373	3.20702
8105579	LRRC70	5.24111	3.33758	4.41327	2.85867	2.32707	2.28342	2.46391	2.33478	2.02309	2.46391	2.1709	2.53863
7907024	POGK	5.7964	5.79355	5.74586	4.78056	4.34574	5.01395	7.25083	6.69333	7.07868	4.82242	4.42744	5.07473
8142852	TNPO3	8.58521	7.82631	8.57053	7.12038	7.02713	6.27247	7.26467	6.86757	7.25436	7.14298	7.29143	7.41832
7953291	CD9	6.66694	6.29521	6.78527	5.61056	5.22364	5.28793	5.62287	5.03214	5.011	5.45384	5.76919	5.34386
7912194	---	5.39657	6.21051	6.02705	7.12963	6.59983	6.17882	5.27196	4.8233	5.22347	6.91398	7.53128	7.00483
7913319	EIF4G3	8.70683	8.5717	8.80552	8.24485	8.26113	6.71904	7.80223	7.66958	7.64674	8.17719	8.17958	8.01955
8106633	MSH3	6.50305	5.50574	6.06647	5.45893	4.99207	4.87964	6.17418	6.04788	5.98131	4.50901	4.89863	5.01467
8011765	SPAG7	6.43301	6.5266	6.51334	6.29478	6.30332	6.02247	7.94006	7.4627	7.76299	5.70692	5.55315	5.96015
7901046	SNORD55	9.53836	8.66497	9.73621	10.2978	10.397	8.66158	9.31067	9.01625	8.99113	10.4725	10.7851	10.3982
7950644	NDUFC2-KCTD14	8.75832	7.06146	8.44433	5.94379	6.64769	4.50161	8.56979	8.55164	8.57839	6.08236	6.43807	6.21846
7923516	CYB5R1	8.36274	7.749	7.70813	7.11705	7.2258	5.93146	7.17784	7.3584	7.30343	7.27112	6.89261	6.8327
7948696	MTA2	6.52591	6.23943	6.27072	5.83506	5.96269	5.05386	7.41707	7.36866	7.45571	5.78247	5.58424	5.8228
8156750	ANP32B	8.0846	8.27575	7.66642	7.07368	7.11299	6.92	9.03827	8.98212	9.33078	7.27058	6.96478	7.20901
8135204	SPDYE2	4.82532	4.6479	4.36354	4.93687	4.94006	5.87878	4.56994	4.73179	4.62709	5.26142	5.20891	5.35829
8154962	DNAJB5	4.68217	5.50347	5.19669	5.88049	6.08571	5.51745	4.96267	5.49855	5.20133	5.97882	6.2998	6.58612
8017850	WIPI1	8.42409	7.75262	8.17109	7.16748	7.05588	4.36727	6.16433	6.70839	6.25195	7.28756	7.15535	6.91698
8056047	WDSUB1	4.65522	3.9136	4.08914	3.1448	3.02183	2.9011	3.69218	4.73983	4.37329	3.17375	2.65642	2.70087
8170590	NSDHL	4.50644	4.67085	4.62869	3.54534	3.74564	4.3786	6.45335	6.34962	6.31529	3.99983	3.81072	4.13928
7918657	PTPN22	7.89929	6.97548	7.66634	6.20703	6.03013	4.56243	6.52246	6.6905	6.13124	6.03605	6.45989	6.44738
8066716	ELMO2	8.98924	8.56243	9.30247	7.70393	7.11162	4.99728	7.71383	7.39136	7.539	8.01809	7.4186	7.91844
8030049	CYTH2	7.92887	8.40859	8.12379	8.85191	9.18529	7.24184	8.37519	8.31987	8.26317	8.76037	8.98466	8.95068
8017582	TEX2	6.71748	5.66277	6.92436	4.96338	4.91818	5.47823	5.7436	5.75958	6.01588	5.34956	4.49052	4.86283
8151644	RMDN1	5.96811	5.11197	5.17446	4.05863	4.2579	4.19265	5.4728	5.26772	5.49377	4.52496	3.9679	4.35436
8070811	SUMO3	8.81706	8.15206	7.56165	7.40561	7.0849	6.49118	9.91742	9.62269	9.57198	6.50401	7.04526	6.83446
8147990	---	4.47886	4.18688	4.64717	4.90974	4.85948	5.86931	4.25241	4.18546	4.07304	5.2851	5.09033	5.02156
7995574	HNRNPA1P10	7.02374	7.10954	6.3696	6.18573	6.01749	5.45711	9.22459	9.16081	9.34044	5.73699	5.87747	6.07086
8015712	COA3	6.28017	5.91674	5.56937	5.05829	5.22523	4.81237	7.98055	8.13158	7.87189	5.25255	4.8924	4.71246
8046848	ZC3H15	8.74357	8.61983	8.25656	8.50334	8.27043	6.23807	9.06936	9.28433	9.12257	7.85417	7.83494	7.7833
8123524	EXOC2	5.05983	5.36493	5.38134	4.27282	4.18218	3.85929	5.95704	5.75133	5.45262	4.35161	4.53487	4.61155
7948902	SNORD29	8.54501	7.92869	8.16873	9.33185	10.1497	9.23574	8.67046	9.01708	8.85261	9.7752	10.2883	9.10268
7906720	FCER1G	11.7991	11.1556	11.496	10.1114	9.57042	7.37107	10.8563	11.0272	10.703	10.108	10.6554	10.5121
8025788	SMARCA4	6.58104	6.69259	6.25331	5.75629	6.10952	5.56884	7.50978	7.58815	7.38961	5.29865	5.52701	5.93746
7948534	DDB1	5.81319	5.41824	5.12861	4.60407	4.7226	4.24045	7.07036	6.69065	6.80825	4.32304	4.78216	4.36557
7965679	---	3.55422	3.34279	3.187	3.52761	3.57767	3.91833	3.27481	3.38838	3.35242	4.10972	3.8464	4.01309
8117485	BTN2A1	7.00736	7.33202	7.53098	7.9749	8.15908	6.05873	6.77814	6.48272	6.87742	7.88192	8.41518	8.40894
8102214	PAPSS1	7.29799	5.61069	6.88203	5.53013	5.42186	3.5191	6.18381	6.07456	5.87773	5.04495	4.5759	5.01423
7902448	RPL17	8.85649	8.95829	8.45159	8.10308	8.225	6.41708	10.2333	10.2884	10.2574	7.97359	7.84925	8.20116
8159984	PLGRKT	5.90171	5.6772	5.19183	4.24077	3.67449	3.84692	4.27936	4.46069	4.5265	4.35865	4.73337	4.60552
8042144	REL	8.73261	9.12584	9.22112	8.56176	8.46234	5.21158	8.82327	8.95273	8.84936	8.26611	8.37002	8.39495
8004510	CD68	8.12273	7.43243	7.4384	7.07717	7.22707	5.78012	10.1467	10.3903	10.2192	6.49642	6.56642	6.96655
8143555	OR9A2	4.01335	3.23506	4.21522	2.61735	2.63814	4.28758	2.6425	2.82579	2.42694	2.95257	2.4522	2.47841
8154394	SNAPC3	6.18289	5.23547	6.15846	4.74025	4.80789	4.93116	7.66134	7.88535	7.44938	4.78716	3.92444	4.66664
8133690	MDH2	7.56983	7.67133	7.32963	6.77365	6.94136	4.97276	9.15372	8.96306	9.29471	6.20037	6.16756	7.01063
7961483	HIST4H4	3.23561	3.19111	2.60114	3.03697	3.59752	3.99769	3.17063	3.16461	2.73485	4.21786	4.54091	3.84604
8105778	PIK3R1	8.21049	7.42572	7.64823	6.7968	6.87277	4.94331	7.30717	7.41904	7.58889	6.64766	6.63496	7.05332
8148728	CYC1	8.66571	7.62559	7.74535	6.91688	6.66482	5.07677	9.65003	9.61421	10.0662	6.46587	6.08976	7.04717
8003953	PSMB6	8.70627	8.30818	7.9461	7.64649	7.31366	6.33828	9.09223	9.11296	9.23752	7.32535	6.86562	7.55575
8104422	MTRR	8.2401	5.00514	6.86106	3.69868	3.72599	3.24563	6.81601	7.02573	6.84142	3.66931	3.94831	3.76902
8136179	KLHDC10	6.54804	5.84573	6.48339	5.53592	5.22692	5.54824	6.93017	6.62986	6.91199	5.20122	5.36542	5.47137
8039257	LAIR1	9.97883	7.23385	7.64885	5.3887	4.99912	5.39017	7.24339	6.8028	7.95893	5.40164	5.52183	5.38497
8015187	KRTAP1-4	4.80267	4.84694	4.60937	5.21946	5.39076	5.63126	4.73591	4.65058	4.69624	5.58794	5.28583	5.26334
8084213	---	4.42524	3.54721	3.58634	4.53726	5.22323	5.69873	3.57864	3.33208	3.77666	5.22659	5.4282	4.85846
8053366	SUCLG1	6.5658	6.08212	6.5865	5.40453	5.3617	4.41934	6.45793	6.06406	6.23929	5.33444	4.99675	5.79338
7984257	RNU5A-1	2.89315	2.71164	2.73777	3.57181	4.13068	2.93018	3.63541	2.84573	2.64739	4.32163	5.05898	3.78172
8122348	VTA1	7.31165	7.03743	7.24547	6.28371	6.38675	4.72624	7.06086	7.10814	7.07494	6.66665	6.31108	6.67672
7991357	C15orf38-AP3S2	7.97458	8.28557	8.58487	6.85805	7.17007	5.60143	7.94996	8.21094	8.21678	7.10811	7.24615	7.65731
8040142	CPSF3	6.26037	5.79185	5.33282	4.42605	4.56557	3.94965	6.98137	6.72937	6.62827	4.9881	4.16722	4.55755
8135197	SPDYE2	4.86063	4.64114	4.3976	4.84456	4.9424	5.68967	4.58678	4.66483	4.55973	5.21211	5.24515	5.37091
8109475	MRPL22	6.13789	5.92512	6.03125	5.29723	5.20474	5.68422	6.29398	6.34438	6.68455	5.13805	5.22036	5.54758
8022170	RPL6	10.179	10.3799	9.78423	9.40634	9.38228	7.08351	12.0729	12.0907	12.0757	9.24514	9.09411	9.56086
7975095	PLEKHG3	5.61966	5.58716	5.66148	6.5651	6.80752	4.99295	4.19895	4.46861	4.57396	6.21549	6.75723	6.28802
8081941	---	2.58814	2.17169	2.36251	3.03325	2.73772	3.93031	2.3259	2.67381	2.68153	3.19692	3.08087	3.06876
8106141	FCHO2	5.85451	6.60669	6.9648	7.29289	7.34031	5.79431	4.94521	5.56855	4.98642	7.68586	7.81916	7.68211
8102171	TBCK	6.63296	5.31743	5.54571	4.5676	4.43492	3.16617	6.52873	6.89723	6.79512	4.15735	4.43519	4.64734
7903119	ABCD3	3.78056	3.66431	4.0185	3.00395	2.31675	3.18949	3.1443	3.46545	3.58763	2.77908	2.49065	3.07277
8083605	RSRC1	5.32484	5.16738	5.3347	5.0337	4.73873	4.90109	6.00911	5.85814	5.8273	4.55482	4.36528	4.81504
8158167	LCN2	9.31156	9.42844	8.89249	7.0439	6.062	5.95766	4.84823	4.01545	5.56617	7.28637	6.75385	7.76309
8132055	MTURN	4.57486	5.53394	5.16516	6.07761	6.11207	5.64524	5.17404	4.92705	5.29013	6.05546	6.16875	6.09784
7915594	---	5.39517	4.55007	5.07954	4.49049	4.17163	3.61149	6.15266	6.32987	6.3044	3.76749	3.98587	4.23217
7966534	RPL6	10.3519	10.578	10.02	9.64044	9.61787	7.28873	12.2187	12.1733	12.2082	9.48261	9.28124	9.7839
7902512	DNAJB4	3.46396	3.47664	3.20352	2.9904	2.90998	2.96962	4.31813	4.22566	4.06598	2.83415	2.83291	2.57149
7904969	---	7.63546	7.87357	7.65782	7.31372	6.95188	5.84588	6.44825	6.17532	6.23147	6.8581	6.68205	7.21653
8156575	---	6.19221	6.156	5.73706	5.04502	5.46194	3.7534	6.80802	6.36049	6.5026	5.08246	5.28806	4.57448
8150112	GSR	8.99529	8.14303	8.90105	7.9086	7.86119	6.62195	7.76407	7.4036	8.07321	7.68415	6.93173	7.53299
8068168	SOD1	8.71992	7.98754	7.7454	6.92132	7.01109	5.05234	9.65338	9.70086	9.76524	7.00233	5.96527	7.07853
8020241	PSMG2	7.35531	6.71803	6.92561	6.28131	6.00339	4.02086	8.57118	8.64629	8.22847	5.63305	6.01406	6.27927
8083850	---	5.07034	5.11049	5.42928	4.48573	4.14972	4.3003	3.7244	3.40486	3.8639	4.4017	4.45156	4.47296
7940153	FAM111A	5.86242	6.54481	6.26036	6.62111	6.95631	6.22532	6.87781	7.29068	7.14051	7.07783	7.34181	7.03092
8001211	ITFG1	7.98957	7.46554	8.28025	7.08199	7.02747	4.95941	8.12525	8.28872	8.00855	6.82356	6.96806	7.15515
8055261	RAB6C	7.24396	6.48289	6.84293	5.82618	6.07913	4.51722	6.83465	6.76064	6.7488	5.82797	5.50838	6.18036
7965022	KRR1	5.43528	5.59187	5.06418	4.47889	4.56443	4.81492	5.76976	6.13023	6.0868	4.70027	4.55028	4.57792
7965855	NUP37	4.92693	5.45645	4.86032	3.83907	3.84682	4.07607	5.52701	6.14721	6.04697	4.20815	3.5426	4.13033
8093256	---	6.84113	6.95683	6.32546	6.06816	5.98778	4.91096	8.30065	8.35277	8.40614	5.86103	5.73196	6.09311
8127987	SNORD50A	7.8574	7.84891	7.5075	9.63723	9.81989	7.65913	7.74516	7.87213	8.2873	8.53372	9.0321	8.4635
7897824	MFN2	8.49178	8.37396	8.84226	7.43141	7.40957	6.25866	7.32771	6.82717	7.1435	7.30201	7.94225	6.88917
7956013	BLOC1S1	9.93324	9.30876	9.84008	8.68504	8.51912	6.21159	8.63686	8.58787	8.74203	8.70434	8.73368	9.09051
8052204	RTN4	8.58296	8.61495	8.48517	7.99835	8.04957	6.38117	8.07663	8.05632	7.92164	7.90996	7.98316	8.16141
8023228	DYM	7.24693	6.71977	6.89757	6.15047	5.97824	3.99705	7.68202	7.33089	7.65935	5.92727	6.14779	6.32147
7993833	METTL9	10.2033	9.13758	9.94524	8.67098	8.76406	7.13788	9.34484	9.24123	9.32782	8.66454	8.6049	8.77562
8163795	PSMD5	5.69887	4.39715	5.20908	3.5703	4.04381	4.29789	4.71107	5.41377	4.95244	3.77008	3.15851	3.7357
7990808	---	4.03283	4.67772	5.18288	6.12502	7.26076	4.02049	2.71093	2.83071	2.86484	6.5226	6.64006	5.77638
8051066	MPV17	6.92152	7.08176	6.77414	6.07894	5.94738	4.98713	9.23395	9.26664	9.23798	5.94504	5.91727	6.52092
8123467	ERMARD	4.29459	3.97416	4.47504	2.9971	3.61074	3.66516	5.12264	5.40358	5.3562	3.23744	3.08646	3.55205
8142663	NDUFA5	4.78501	5.1348	4.90164	4.59177	4.6575	4.79108	5.91254	6.03495	6.16827	4.31219	4.31219	4.39731
8097782	RPS3A	10.1643	10.1297	9.75578	9.74947	9.71031	6.42945	11.771	11.7641	11.5944	9.13204	8.83091	9.51243
7963786	ITGA5	7.74949	8.77992	8.79256	9.66149	9.61484	6.56172	8.79415	8.80125	8.85189	9.43393	9.66276	10.2544
8075924	MFNG	5.9747	6.44179	6.28208	7.18096	7.08451	5.14773	7.70025	7.66104	7.99945	6.99611	6.86495	7.44473
8055872	CACNB4	4.10049	4.07453	3.9452	5.15473	5.83298	4.57098	3.93725	4.09693	4.25755	4.83959	4.76553	5.19514
8067288	ATP5E	9.55801	9.21429	9.28183	8.65184	9.04495	7.3796	9.46295	9.40698	9.42226	8.77494	8.69011	8.58027
7940582	BEST1	7.82512	8.36772	8.31424	8.95067	8.83197	6.63135	6.46448	6.75636	6.89903	8.95423	8.87823	9.20121
7971620	KPNA3	5.67907	4.86562	5.08067	4.42896	4.59061	2.27788	6.12269	6.05179	5.66558	4.16947	4.10407	4.37472
8101376	SEC31A	6.6871	6.95712	6.37303	6.49629	6.55123	4.34997	8.19165	8.32835	8.20709	5.43348	5.81843	6.08962
8146198	POLB	6.08583	8.35135	6.88338	8.80266	9.20932	6.65112	7.60929	7.719	7.65267	9.14818	9.55355	8.97222
7962367	ZCRB1	5.91945	5.81641	6.02543	4.79296	4.91251	3.66708	6.47534	6.27273	6.19944	5.37644	5.16136	5.41644
8165661	COX1	11.5966	10.6181	10.6367	9.73504	9.39687	7.82565	11.7895	12.0168	11.9377	8.97376	8.99229	10.1224
8132929	GBAS	7.25993	6.40573	6.37068	5.24759	4.84154	4.97386	7.80847	7.92242	8.0952	5.33782	5.54227	5.7732
7975713	FCF1	5.59032	5.04463	5.70088	4.81839	4.92037	3.08627	6.01084	6.04018	5.93135	4.74327	4.70606	4.47574
8139592	HUS1	6.64685	5.81903	6.26881	5.40971	5.74246	5.009	7.29384	7.41304	7.29861	5.35297	5.01508	5.44167
8107520	TNFAIP8	6.15809	5.80333	6.36149	5.40523	5.18253	4.72175	5.92401	5.77083	5.85803	5.50533	5.13124	5.3712
8006477	ZNF830	6.25505	6.9237	6.71702	7.58243	7.70293	5.92804	6.52123	6.27587	6.45966	7.21462	7.85444	7.74788
7950671	GAB2	6.93011	7.69508	7.65695	8.24806	8.19173	4.98238	6.51943	6.91323	6.70473	8.24517	8.42659	8.45654
8117594	HIST1H2BM	7.09152	9.08594	7.66444	5.51014	4.86832	6.23546	5.00511	5.93883	5.83879	5.14299	4.88256	6.3623
8141750	SPDYE2	4.9586	4.72018	4.59471	5.03033	5.12079	5.35787	4.67731	4.77537	4.67399	5.27595	5.31467	5.4103
7956009	METTL7B	7.39928	5.67439	6.95066	4.87709	4.99955	4.80853	4.61286	4.51808	4.89986	5.33816	4.79584	4.67572
8156826	TGFBR1	9.08997	8.23095	8.32508	7.28383	7.27213	5.48375	6.59213	6.7112	6.89224	7.26635	7.41202	7.78703
8114455	HSPA9	6.35396	6.63352	6.27276	6.56355	6.95401	6.02624	7.78336	7.58488	7.80404	5.87059	5.54796	5.63566
8096733	SGMS2	6.40578	4.68736	6.28894	3.71121	2.9786	3.73168	7.12157	6.87501	6.43363	3.72507	3.6102	4.15128
8139488	IGFBP3	4.62888	4.66693	4.43203	4.96736	4.78892	5.75963	4.19592	4.31548	4.3383	5.08474	5.14431	5.11768
7973314	OXA1L	8.0829	8.21347	8.03727	7.71367	7.51075	6.07123	9.42458	9.33695	9.68963	7.32812	7.53746	7.56457
8016159	DCAKD	6.57879	6.6097	6.4968	5.65997	6.23801	5.19601	6.97909	7.12505	7.61851	5.10058	5.57895	5.79424
8152962	LRRC6	5.95629	6.46034	5.64066	6.58878	5.8879	5.00832	4.35642	3.42199	4.1116	7.10375	7.52629	7.62421
8141222	RPS3A	9.96089	9.92	9.56573	9.55122	9.53178	7.00046	11.6545	11.6169	11.4551	8.95955	8.68588	9.33348
8053890	STARD7	6.67616	6.55262	5.92488	5.38129	5.87205	3.77642	8.28686	8.21922	8.07293	5.43084	5.33023	5.53229
8115234	ANXA6	8.08974	7.17924	6.69728	5.53288	6.09675	5.30214	7.90033	7.09584	8.02666	5.35966	5.72943	5.8546
7905067	HIST2H4B	4.87398	6.02909	6.24147	7.46112	6.79307	4.42835	4.28945	4.91583	3.93955	7.15161	7.51173	7.66894
7919627	HIST2H4B	4.87398	6.02909	6.24147	7.46112	6.79307	4.42835	4.28945	4.91583	3.93955	7.15161	7.51173	7.66894
8121277	AIM1	6.68567	6.58104	6.8625	5.89448	6.22491	6.03498	6.33252	5.93705	6.23114	5.88762	6.01428	6.1154
8180260	---	7.19297	6.87634	6.47366	6.22795	6.12685	6.0291	8.89864	8.80808	8.77111	5.99007	5.7545	6.21207
8100541	IGFBP7	7.07853	5.99269	6.12706	5.88044	5.144	5.56082	5.93659	5.84621	5.85679	4.8876	5.21925	5.18423
8082688	DNAJC13	7.55133	6.96567	7.81057	6.12003	6.19909	5.08749	7.09434	6.84812	7.02009	5.84818	6.2743	6.72838
7940996	PRDX5	11.7222	12.1077	11.7355	11.5356	11.2977	7.71855	11.2956	11.0873	11.2853	10.9492	11.1649	11.3079
8036763	DYRK1B	5.71451	5.9005	6.04759	6.1886	6.28064	6.03293	5.94839	5.89034	5.81865	6.47464	6.3753	6.47472
7964076	PAN2	5.91414	6.33362	5.62274	5.65614	5.37267	4.51593	7.24653	6.95413	6.80904	4.71279	4.8794	5.27359
7986765	---	8.63825	9.44182	8.56917	8.32676	7.79764	4.8396	11.7967	11.7193	11.6153	7.00292	7.11804	8.11328
8060758	PRNP	7.84752	7.02766	7.33253	6.45248	6.96147	6.43572	8.40196	8.93422	9.16968	6.44885	6.10907	6.01528
8148049	NOV	4.78858	5.75908	4.97713	7.06843	6.57463	4.03493	5.03179	4.81321	4.15334	6.24581	6.67077	7.05755
8087250	MIR425	4.84966	5.77876	5.42963	6.7892	6.54772	5.09244	4.9607	5.2736	4.55514	6.50723	7.58826	6.53562
8148302	---	6.86747	6.86553	6.55993	6.13656	6.39263	5.07766	6.61794	6.14893	6.295	6.17979	5.97399	5.72421
8056734	TLK1	8.88786	8.65166	9.12195	7.94382	7.94122	4.66258	7.88794	7.97298	7.90144	8.07906	7.98379	8.43235
8092532	---	6.94291	6.64415	6.32291	5.95302	6.42075	5.24777	9.8461	9.78168	9.8379	5.39968	5.48026	6.04828
7964262	NACA	8.59916	8.36298	8.41222	8.04513	7.85269	7.16167	9.29079	9.24932	9.62722	7.84771	7.72652	7.88016
8081055	CHMP2B	7.3448	6.90868	7.11256	6.78229	6.5419	4.45132	6.46164	6.39241	6.42169	6.2209	5.91991	6.63661
7924897	CCSAP	5.2112	5.57237	5.30165	5.99997	6.18796	6.68896	5.7801	5.70486	5.95211	5.97159	6.09811	5.90341
8139232	PSMA2	7.82148	7.61582	7.1617	6.81439	6.52506	4.93649	8.22723	8.07647	8.15845	6.79976	6.80174	6.62562
8020468	RBBP8	4.79781	4.81638	4.93338	4.27445	4.29484	4.86537	5.56579	5.67415	5.66622	4.49388	3.92387	4.0677
8020508	RIOK3	8.53021	8.04725	8.02541	7.64536	7.66986	5.92152	7.68162	7.7264	7.65826	7.51133	7.45211	7.62149
8121613	RWDD1	7.31421	6.42742	6.40885	5.95549	5.9878	6.30075	7.27381	7.57656	7.44345	5.83319	5.68725	5.40933
8163629	TNFSF8	6.53392	7.51241	6.63763	8.10221	7.68313	6.34916	9.16746	9.17616	9.09021	8.97898	7.90578	8.10979
8057929	---	2.17349	2.28995	2.37398	3.83907	4.53177	3.24437	2.27368	2.83953	2.08991	4.90488	3.44097	3.56404
7961983	TM7SF3	6.78621	6.32235	6.98785	6.01695	5.89907	4.83991	6.6662	6.80778	6.50329	5.81088	6.068	5.72214
7941236	CDC42EP2	5.80509	6.95804	6.67311	7.61395	8.09005	6.71321	6.43594	6.50404	6.55356	7.47439	8.30921	7.77505
7925851	WDR37	7.9691	7.2333	7.45742	6.7985	6.86193	4.81313	7.09379	7.12153	7.04025	6.78749	6.66276	6.83402
8028162	TBCB	8.58673	8.28781	7.97284	7.35064	7.26381	6.27146	8.32273	8.11358	8.19361	7.36957	7.46055	7.71532
7920317	ILF2	8.43616	7.4616	6.86332	7.00566	6.98091	4.71813	9.22456	9.13492	9.1488	6.07388	6.2541	6.19124
8169365	TMEM164	6.76648	7.57178	7.24313	9.41735	8.48096	6.44301	6.8153	7.28238	7.11748	8.70239	8.34224	8.29257
7968972	---	6.82263	7.04981	6.88977	6.04366	6.30754	5.04966	7.38261	7.32957	7.40364	6.00437	6.16701	6.51758
8040386	DDX1	6.03568	5.29113	5.36416	4.90398	3.82899	4.03106	7.46366	7.36931	7.17016	3.72576	4.24938	4.503
7958644	ATP2A2	7.08125	6.20278	6.06418	5.50228	5.54996	4.19731	8.33439	8.15132	8.35775	5.20376	4.93439	5.63042
8054054	ANKRD36	4.80325	6.2627	5.54912	4.50531	4.06465	4.6004	6.14123	5.67464	6.31545	3.68087	3.93448	4.33208
8076417	NDUFA6	7.84574	7.99064	6.96725	7.15848	7.27173	6.27393	8.8341	8.99377	8.95832	6.66285	6.28491	6.58653
7999360	RPL21	7.64806	7.47645	7.09112	6.92842	6.82988	4.20056	9.4413	9.61287	9.50276	6.6825	6.58101	6.84039
8112881	---	5.93126	6.04716	6.66801	7.18272	7.16144	6.5554	6.42915	6.23113	6.5103	7.00661	7.48485	7.00278
7924351	EPRS	4.89834	5.05607	4.53575	3.97147	4.03687	4.35283	7.34358	7.02378	7.09612	4.26452	3.50002	3.91216
8027650	UBA2	5.48359	6.01844	5.3408	4.79379	4.58232	4.01558	7.56526	7.77839	7.77133	4.61432	4.72829	4.97028
8117330	HIST1H3A	5.84876	7.02846	6.3586	8.1875	7.9846	4.29923	6.0035	6.87261	6.69112	7.44143	8.72728	8.21026
7928890	FAM25C	5.16925	5.19063	4.84277	5.82753	5.62738	5.23268	5.61757	5.52107	5.60095	5.55502	5.68821	5.78783
8143307	HIPK2	7.43359	6.80705	7.46171	6.37644	6.4592	4.90679	7.00599	7.09347	7.21365	6.29214	6.21514	6.6206
7970524	ZDHHC20	8.8845	6.98247	8.18735	6.35142	6.0323	5.46057	7.27991	6.97363	7.37687	6.29136	6.42736	6.12512
7906662	UFC1	8.37475	7.31942	7.37957	6.51252	6.57505	5.76396	9.2097	9.31915	9.1167	6.10493	6.40248	6.82261
8096109	MRPS18C	5.43028	5.30761	5.48081	4.17098	4.77026	5.44775	5.32752	5.53098	5.62017	4.48753	4.53206	4.83214
8086607	LTF	8.81471	9.68965	8.85439	7.53364	6.16217	6.7517	5.28056	5.17125	4.90909	7.29527	7.38386	7.88702
7899407	SMPDL3B	4.84299	5.30789	4.84998	6.20361	6.09193	5.64587	5.03109	4.92332	4.4936	5.95502	6.05439	5.61745
7918681	RSBN1	8.22936	7.61373	7.79138	6.40406	6.73371	4.50418	6.27099	6.29221	6.26355	7.15198	6.91256	7.21583
8062349	RPN2	7.02352	6.92613	6.24333	5.96495	6.02526	4.71457	8.46787	8.20022	8.23785	5.94348	5.47998	5.88414
7977507	RPPH1	8.25038	7.81724	8.72967	8.80556	8.82897	7.6982	7.90164	7.59363	7.63856	9.47548	9.55987	8.95768
7945666	CTSD	10.8784	10.3788	10.985	9.70475	9.45472	7.34209	10.1488	10.5664	10.4596	9.3081	9.66956	10.1155
7935951	C10orf76	6.2367	5.79729	5.79483	5.1404	5.31866	5.01342	6.80247	6.70738	6.78934	5.39283	5.00313	5.28919
7967149	ANAPC5	5.57951	5.82174	5.66574	5.21745	4.97004	4.49714	6.89295	6.70315	6.67112	5.02637	4.82502	5.24085
8107119	FAM174A	4.95063	5.58985	4.90675	6.73973	6.76732	3.93106	4.49985	4.28796	4.01802	5.93813	6.27618	7.01656
7966345	PPTC7	6.10086	6.74039	6.46516	7.64058	7.51551	4.93116	7.14092	7.33643	6.84396	7.07603	7.45088	7.80014
8165676	ND4L	9.8985	9.02158	9.68955	8.59124	8.29181	8.61664	10.3107	10.3134	10.2982	8.04461	8.15467	8.87709
7976571	GSKIP	4.35165	4.3675	4.01299	3.05245	3.80973	3.62248	3.13595	2.81485	2.88357	3.33429	3.22024	3.47221
7946439	TMEM9B	7.06144	6.93136	6.52389	6.18297	6.4017	3.3006	7.32478	7.75582	7.32951	6.20348	5.92577	5.91943
7999827	RPS15A	9.35944	8.79809	8.63928	8.36433	8.18833	7.13088	9.78612	9.78739	9.81924	7.97054	7.539	8.29462
7907439	PRDX6	8.30561	8.07184	8.51166	7.35665	7.84477	5.00418	8.389	8.39302	8.50785	7.53975	7.6147	7.61043
7940688	POLR2G	9.2068	8.60164	8.58904	8.17769	8.21919	5.42714	9.56031	9.75835	9.52494	7.87084	7.96523	8.16777
7917561	GBP4	3.92538	5.70502	4.24752	5.50152	6.03404	4.29596	5.34388	6.34248	6.168	6.39975	7.66489	6.49472
8180287	---	11.2718	11.3069	10.8157	10.7266	10.5267	8.90719	12.5905	12.7228	12.6887	10.3028	9.96925	10.6011
8005955	SNORD42A	4.7102	4.88932	5.14502	5.2491	5.79906	4.95711	5.23476	4.71982	5.22045	5.95755	6.85284	5.78857
7901140	MAST2	5.82494	5.57055	5.76286	5.21121	5.18483	4.21725	5.35425	5.51531	5.59795	5.28505	5.02779	5.13666
7936994	---	2.75336	2.86532	2.57922	3.32787	3.43578	3.50727	2.56088	2.65786	2.8128	3.61563	3.49056	3.13706
8051396	NLRC4	8.85521	7.73299	9.36781	6.36557	6.42626	5.24887	7.30476	7.02246	7.06808	7.13636	7.29574	7.08832
7933228	MARCH8	6.34119	7.20237	6.68183	7.72777	7.69056	3.4081	5.36615	5.842	6.1242	7.87261	7.62209	8.05743
8080878	ATXN7	7.89314	8.23809	8.46659	8.69394	8.76405	7.03953	7.5986	7.60052	7.49637	8.81452	8.9677	8.82327
8104298	NDUFS6	8.44715	8.31416	8.02112	7.73002	7.95511	5.77283	9.76773	9.55998	9.65717	7.75003	7.42465	7.58952
8083272	GYG1	9.91789	7.64773	9.41674	5.65057	5.2992	5.76805	6.66784	6.53973	6.47679	6.81779	6.54168	7.26024
8037322	ETHE1	6.95276	7.23075	6.45704	5.61027	5.66949	5.83927	7.91937	7.7966	7.58698	5.68985	5.85789	6.24559
8180371	---	9.99535	10.2952	9.62038	9.31295	9.0513	7.4216	10.4529	10.4493	10.411	9.04207	9.16084	9.35886
7917779	GCLM	5.7852	5.1282	6.06449	4.7856	4.09565	4.89278	3.85651	3.96724	4.14206	4.54794	4.35613	4.69665
8050215	YWHAQ	8.67085	8.15601	8.3546	7.68896	7.21471	5.86695	9.18379	9.14896	9.29327	7.53375	7.21169	7.801
8167428	---	3.71861	4.15428	3.46424	5.27253	4.56691	4.58956	3.66133	4.01576	3.54105	5.26517	5.05548	4.54639
7974471	---	6.5473	6.06665	6.39509	5.87583	5.67765	4.69739	5.93647	6.66383	6.26419	5.37911	5.50529	5.52613
8036324	ZNF260	4.03156	3.80828	3.43125	3.14286	2.73016	3.20651	3.86712	4.04999	4.26015	3.02287	2.78746	2.96193
8168500	PGK1	9.3223	8.84703	8.69952	8.13493	8.28947	5.20122	8.20254	8.10226	7.93629	8.03978	7.93946	8.39593
7944223	KMT2A	6.58624	6.78762	6.22029	6.17737	6.156	4.51907	8.21069	8.29711	8.12348	5.79121	5.65142	6.00199
8073192	---	8.53624	7.59	7.88714	7.20394	7.66587	5.31396	8.83133	8.72851	8.74993	7.1951	6.91814	6.75899
8087283	QARS	8.11913	7.70045	7.14817	6.68366	6.90215	5.20122	9.5718	9.47605	9.61688	6.54473	6.52478	6.9084
7983940	FAM63B	7.01311	6.31014	6.79892	5.1631	5.51619	4.11952	5.35074	5.03381	5.67138	5.39489	5.30937	6.01466
7925048	EGLN1	7.30383	7.16853	7.43879	7.86028	7.58537	5.76581	6.22999	6.24292	5.90664	7.84959	8.05363	7.92811
7899774	HDAC1	7.61369	7.45127	7.15165	6.91132	6.65963	4.9281	6.95604	7.16452	7.20049	6.63565	6.5552	6.89515
7956743	RPL14	9.1557	9.32842	8.82568	8.56688	8.67639	4.49451	11.1777	11.2505	11.0398	8.35517	8.46089	8.54555
8139832	ERV3-1	6.58724	6.89042	6.54816	8.30832	7.87889	6.51872	5.5687	5.18452	4.80174	7.39672	7.6757	7.81624
7990165	PARP6	7.70868	7.69963	7.88218	6.80666	7.31251	4.89417	8.28753	8.34894	8.23529	6.88755	6.86729	7.30543
7938448	USP47	5.55812	4.79425	5.01828	4.27347	3.77316	3.97972	5.5431	5.40489	5.20098	4.10278	3.70878	4.36967
8152782	KIAA0196	6.38675	5.80314	6.31603	5.32648	5.57432	3.71264	6.77519	6.76945	6.98828	5.24676	5.23459	5.6043
8097792	RPS3A	5.55729	4.41568	5.57396	6.57039	6.97021	7.02115	5.80867	6.06119	5.75616	6.62202	7.09693	6.16816
7978272	CIDEB	6.87287	7.45626	7.39258	6.1959	6.32163	4.45387	6.94963	7.15388	7.11135	5.68738	6.24804	6.63994
7902634	RPF1	7.48583	7.34524	7.48008	6.7073	6.57367	5.07759	8.72324	8.62846	8.71939	6.80175	6.62392	7.08297
8120061	ENPP4	5.15532	4.32405	4.54966	3.36554	3.46477	4.47057	3.55001	3.56489	3.54407	3.78022	3.55512	3.99816
8006392	PSMD11	7.60855	7.05551	7.16506	6.87756	6.56894	4.08172	8.08287	7.60761	8.10281	6.39673	6.42211	6.51802
7977440	KIAA0125	6.01439	5.87747	5.56348	6.36004	6.14971	7.756	5.55131	5.69619	5.8121	6.82173	6.46762	6.37583
7959322	PSMD9	7.45217	6.94198	6.98651	6.58534	6.55538	6.05528	6.95413	6.96559	6.84307	6.42992	6.15178	6.59797
7961569	---	5.56783	5.37301	5.72402	5.26824	5.25894	4.341	5.01135	5.21606	5.40576	4.95859	5.00493	4.8401
7935180	PDLIM1	3.84181	3.8344	3.9928	4.81845	4.97774	4.08002	4.4013	4.48057	4.10941	4.33685	4.76114	5.11673
8162006	GKAP1	3.56879	4.3267	3.73028	4.55826	5.03879	3.66626	3.69284	3.6762	3.94752	5.43431	4.6498	4.87938
8101013	RCHY1	6.37755	5.4848	5.90548	4.93877	4.76594	4.70347	5.1498	5.16266	4.98319	4.42481	4.83612	5.24063
8086754	SCAP	7.45594	7.53431	7.6804	8.51693	8.5306	5.98945	7.24575	7.35241	7.25636	8.15793	8.13396	8.8804
7932311	RSU1	8.39827	7.52614	7.63979	6.83337	6.88139	4.30257	7.64369	7.91659	7.80088	6.99459	6.32196	6.96528
7980744	RPS6KA5	4.0035	6.7931	5.56578	7.96749	8.51504	5.27416	5.75223	5.94615	5.43483	7.61161	7.97012	7.98736
7908421	TROVE2	6.37001	6.36633	6.3464	5.80394	5.8303	3.79256	6.1746	5.92799	5.98304	5.55325	5.59562	6.02589
8019807	USP14	5.72197	4.77969	4.39476	4.02045	3.7756	4.07925	6.55424	6.42912	6.37993	3.60331	3.7973	3.82653
8118093	HCG27	7.03823	6.68753	6.2419	6.82481	7.06469	5.76174	4.45402	4.29229	4.87646	7.66882	7.60445	7.51803
8127943	SNX14	5.96445	5.66219	5.47515	4.89411	4.78036	3.50823	5.57911	5.64793	5.78505	5.1193	4.83431	5.13295
8022022	LPIN2	5.61833	6.76643	7.20282	7.81292	8.00426	6.2431	5.72404	5.87146	5.87809	8.1568	7.90147	7.82126
8064833	TMEM230	8.82748	8.51718	8.38462	8.19682	8.37733	5.08886	9.56148	9.83311	9.67051	7.80985	7.8777	8.06934
8024391	DOT1L	6.51896	6.46056	5.97509	5.71002	5.53442	5.16544	6.45992	6.12187	6.28126	5.65777	5.64887	5.36235
8017843	SLC16A6	8.48514	7.83238	8.40809	6.90353	7.43095	5.47235	6.52016	7.39031	6.78943	7.02919	7.29682	7.01535
8073645	SAMM50	5.67382	5.50149	4.55811	4.38753	3.99596	4.67884	7.03232	6.69252	6.76047	4.04247	3.83083	4.27438
8172225	EFHC2	3.73533	4.19377	4.09335	5.63386	5.03323	3.86196	3.08859	3.15599	3.19461	5.85723	4.62649	6.29349
7904907	BCL9	6.74801	6.24381	5.86161	5.90579	5.93541	5.67177	5.29603	5.09813	5.62428	5.24552	5.06859	5.52148
8101992	SLC39A8	5.0267	4.99014	5.31434	4.63101	4.50726	4.79203	4.77255	4.91473	4.47653	4.55196	4.47952	4.28503
7928491	KAT6B	6.80467	6.71082	6.71293	6.30143	6.78661	5.11137	7.24723	7.2227	7.09533	6.19598	5.69262	6.12032
7948606	TMEM258	9.47183	9.25954	9.30335	8.72627	8.9622	6.26059	9.90239	9.76587	9.75394	8.7189	8.65197	8.94756
8129618	VNN1	10.3139	9.39488	11.0203	7.58162	7.57447	5.61768	7.28634	8.24739	7.55348	8.56727	8.9016	8.20153
8076185	CBX7	6.15056	6.22807	6.14466	7.1367	7.06338	6.04301	5.28071	5.64274	5.64318	6.56671	6.97496	7.03257
8054308	TBC1D8	8.23813	6.11355	8.24045	4.74583	4.94704	5.12277	7.04284	7.30697	7.42169	5.17881	5.20016	5.8261
8088020	ITIH4	7.86545	6.18788	8.00597	5.36641	5.51636	4.88522	6.36395	6.13231	6.48529	5.68677	5.77477	5.39043
7899455	PHACTR4	7.21959	6.64398	6.86539	6.20603	5.52099	4.96725	8.54063	8.23778	8.31323	5.11829	4.58953	6.22609
8151090	---	4.31275	4.44993	4.57387	3.03449	3.18763	4.1166	3.25813	4.21852	3.65922	3.04233	3.56377	3.60265
8046604	AGPS	5.2861	5.0099	4.22574	3.76914	3.05372	3.00059	6.07706	5.37811	5.73175	3.62988	3.6716	2.9279
8172266	MIR221	8.79077	8.11624	6.31139	6.86072	6.78412	3.77451	7.11646	6.65588	6.9999	5.08234	5.60794	5.85461
7921987	TMCO1	8.56366	8.26827	8.0271	7.789	7.79576	6.26752	8.76758	8.97958	8.71038	7.6059	7.35014	7.74381
8123181	IGF2R	9.04181	9.21545	10.0734	10.3912	10.5207	6.66608	7.44911	7.54781	7.39058	10.3781	10.3987	10.5871
7918474	DRAM2	6.74364	5.88121	6.87035	5.93324	5.67154	4.23097	7.52754	8.10294	7.94218	4.92821	5.3966	5.54686
8075585	RTCB	6.1345	5.2213	5.40865	5.00922	3.82615	3.50658	6.94139	7.65649	7.59467	4.30767	4.12913	3.88923
7908867	TMEM183A	9.35879	9.12778	8.78779	8.7138	8.8797	5.54158	9.03174	9.03374	9.12181	8.38978	8.36759	8.53613
8067382	PSMA7	9.05731	9.08811	8.9937	8.50954	8.50723	6.82981	9.07046	9.1094	9.23304	8.38904	8.16475	8.70605
8161632	PTAR1	8.07234	7.95788	8.37076	7.39915	6.98031	5.85413	7.6427	7.51471	7.63768	7.36099	7.18745	7.6316
7924499	TLR5	10.1825	9.08225	9.98998	7.02278	6.53974	5.16124	8.51452	8.19713	8.29405	8.50464	8.27528	8.82992
7923659	PPP1R15B	10.1139	10.4745	9.75729	11.3222	11.3481	5.9488	9.84639	9.90262	9.74469	10.6699	11.2475	11.0044
8044263	RANBP2	7.07267	6.58109	6.7995	6.20055	6.73734	5.23764	6.83138	6.78982	6.64741	5.97537	6.168	6.05823
8162147	ZCCHC6	7.92739	8.40809	9.17455	9.58703	9.57026	5.82452	7.32019	7.29775	7.56994	9.55266	9.79275	9.57006
7899486	TRNAU1AP	6.6685	6.20772	6.36305	5.37965	5.24655	5.74797	6.31659	6.38878	6.29888	5.79946	5.06107	5.74991
8051204	SUPT7L	6.18954	5.87551	5.63583	5.28497	5.50219	4.06057	7.52444	7.43403	7.33361	5.19523	4.86301	5.34984
8101844	ADH5	5.42352	5.64764	5.50401	5.25113	5.12028	5.062	6.04009	6.31326	6.29981	5.11321	4.89126	4.82603
8007607	RUNDC3A	3.81155	3.86843	3.7318	4.15149	4.1308	4.9893	4.11081	3.8662	3.77195	4.33814	4.2444	4.5556
8133049	ZNF107	5.03868	4.98997	6.29261	7.05131	6.61003	4.685	4.30011	5.04245	4.75753	7.59702	7.14558	6.54698
8108099	SEC24A	7.17554	6.46902	5.86435	5.70692	5.51715	4.16433	6.01684	6.22176	5.70385	5.06646	5.45626	5.23841
8071907	UPB1	5.63911	6.70078	5.97327	5.67006	5.59656	4.76042	4.30482	3.95216	4.24634	4.81404	5.08661	5.22589
8127526	RPL39P3	10.2507	10.0559	9.77786	9.81338	9.42483	7.56838	11.4775	11.4201	11.4923	9.39001	9.14696	9.45645
7931832	AKR1C2	2.9536	2.91905	3.47612	3.08691	3.53767	3.64784	3.47981	3.56344	3.77007	3.94808	3.82425	3.93603
8138547	TOMM7	8.81557	8.23036	8.52994	8.20971	8.03432	6.30771	10.0339	9.85392	9.73145	7.40543	8.04971	7.39915
8090256	SNX4	4.26849	3.52742	3.99553	3.28787	3.26888	3.50314	4.80805	4.84138	4.83859	3.15911	3.11454	3.28886
8057821	DNAH7	2.54569	2.57743	2.60201	2.8171	2.95409	3.94328	2.67897	2.45738	2.48156	3.02562	3.09738	3.04175
7903582	RPL17	8.98238	9.20685	8.59265	8.21758	8.39825	6.17634	10.5483	10.5039	10.5233	8.12846	8.07758	8.40983
7975995	C14orf178	4.4188	4.68916	4.62657	5.00931	4.88005	6.20272	4.66561	4.78921	4.76621	4.94311	5.23763	5.29997
8073242	ADSL	6.83244	6.97649	5.8937	5.79748	5.23342	5.03468	7.873	7.7062	7.89921	5.32659	4.99445	5.65275
8124413	HIST1H4D	5.15048	5.14086	5.87493	6.20835	6.7203	5.01126	5.21291	5.43823	4.81664	6.64588	6.51524	6.22396
7988031	RPS3AP47	10.0935	10.0787	9.78951	9.71384	9.60615	5.77734	11.6921	11.5362	11.0935	9.06762	8.82829	9.46075
7939465	HSD17B12	4.74644	4.68748	4.62269	4.0502	4.21134	4.02528	4.67838	4.74086	4.37094	4.07231	4.21565	3.70335
7951133	MAML2	4.23951	6.38625	5.41476	7.56227	7.70909	5.39797	7.13005	6.75548	6.90979	6.74399	7.55847	7.50368
8017378	CYB561	3.5844	3.82248	3.649	4.53854	4.86508	4.90141	3.93523	4.31319	4.03952	4.15528	4.71262	4.45151
8147654	POLR2K	7.14697	7.25934	7.11748	6.08914	6.34618	4.66359	7.86791	8.01968	7.31963	6.25256	6.57113	6.29338
8180311	---	6.83762	5.25335	5.70713	3.63938	4.40936	4.04312	7.29702	7.14862	7.56442	4.50763	3.97974	4.51719
8083352	SELT	11.5684	11.3111	11.2226	10.5541	9.89421	8.32786	10.6636	10.6036	10.6076	10.3478	10.1533	10.8433
7902227	GADD45A	9.94267	7.16853	9.61286	6.38154	5.94785	5.48421	5.51145	5.70506	5.59418	6.63288	6.20108	6.44481
7988208	CATSPER2P1	3.60488	3.92291	3.72573	4.49124	4.36917	4.63574	4.14569	4.31898	4.14147	4.30631	4.3862	4.19339
8020179	CHMP1B	7.92661	7.88199	7.97881	8.51632	8.63549	7.18233	7.77363	8.16008	7.66765	8.43812	8.5402	8.74985
8107005	CAST	9.32583	8.30409	8.77721	7.03199	7.78017	5.38646	9.10308	9.35699	9.12908	7.26215	7.42723	7.96873
8117746	SNORD32B	5.67877	5.47475	5.52536	5.93744	6.38946	5.96854	5.2457	5.40213	5.35102	6.2455	6.42591	6.0172
8008321	ACSF2	3.47045	3.33141	3.54264	4.19342	4.03946	3.85724	4.93733	4.29244	4.77576	4.25696	4.49593	4.0047
8163784	FBXW2	8.99465	6.82418	8.45495	6.11458	6.19257	4.8107	6.71201	6.61744	6.52968	6.30125	5.687	6.45411
8152648	ZHX1-C8orf76	5.99538	5.77812	5.89361	5.69497	5.58287	4.6488	6.35548	6.62348	6.53124	5.35534	5.05402	5.45132
7977736	RAB2B	5.30936	5.45834	5.11278	5.28227	5.30115	5.41367	5.55402	5.42479	5.46693	4.79857	4.83867	4.64005
8157905	MVB12B	6.17878	5.6659	5.79925	5.14926	4.98159	5.19869	5.27975	5.31073	5.76386	5.17463	4.74117	5.19723
7905308	BNIPL	5.19214	5.3065	5.36238	5.75458	5.98898	4.93116	4.35886	4.83649	4.97961	5.84617	6.12243	6.50333
8061324	XRN2	9.30058	8.75922	8.82027	8.22671	8.13644	4.56467	8.25758	8.32687	7.95437	7.44726	8.0475	8.35446
7916262	C1orf123	7.42296	7.27049	7.4329	7.12973	7.38031	5.06499	8.27174	8.45805	8.52241	6.52447	6.65946	6.99714
7919776	---	2.30585	2.49683	2.33229	3.34051	2.90328	4.15093	2.52059	2.85919	2.45743	3.97435	3.18293	3.04955
7979355	---	6.9331	6.5374	7.34493	7.79812	7.91434	6.86611	6.0989	5.48975	5.99637	7.57215	8.45724	8.38772
8000375	ARHGAP17	5.43971	5.45857	5.46537	5.03997	4.98612	4.53531	7.11644	6.99845	6.73986	4.7545	5.04168	4.88033
7931778	PITRM1	6.72296	6.20114	6.83043	5.66674	5.57137	5.79789	7.58716	7.89145	7.56353	5.57805	5.99241	5.77649
8076046	TMEM184B	6.21792	6.62322	6.43137	7.24457	7.51172	5.55724	5.89915	5.87558	5.69525	6.83184	7.38549	7.33168
8155547	PTGER4P2-CDK2AP2P2	5.41524	5.56628	5.30729	5.69063	5.52216	4.67356	5.29478	5.47331	5.27449	5.96901	5.89384	5.96734
8163882	RAB14	8.26666	7.96875	7.93754	7.47596	7.30152	5.5519	7.61606	7.71289	7.5245	7.49078	7.36437	7.60182
8045018	PROC	4.59	4.93695	4.77798	5.4738	5.57514	5.05875	4.93695	4.65053	4.75051	5.31656	5.28916	5.35825
7968417	FRY	6.85711	8.06494	7.94749	9.12431	9.10675	6.20583	7.53232	7.54954	7.34484	8.55329	9.02587	8.88279
8180410	---	8.02814	7.56106	7.05062	6.8835	6.98003	5.64867	9.62521	9.52679	9.56205	6.75463	6.3641	6.70764
8174710	RPL39	10.2215	10.0078	9.74759	9.78388	9.41235	7.69511	11.441	11.3808	11.4597	9.37364	9.11952	9.43636
8052828	ASPRV1	3.92194	4.91739	4.44886	4.99839	5.65334	5.20779	3.91437	4.65737	3.99323	5.95416	5.69913	5.44007
8007420	AOC3	4.1182	4.72359	5.26383	5.86167	6.03307	3.76605	3.73377	4.09453	3.84041	5.72454	6.28138	5.62534
7956046	DGKA	8.72532	8.26484	8.65163	8.12646	8.04936	7.44498	7.84742	7.84886	7.70514	7.72041	7.91997	8.06906
7954711	KIAA1551	9.9146	10.9021	11.2063	11.8209	11.8024	10.2535	9.07763	9.04882	9.0976	11.8833	11.6947	11.8871
7927854	HNRNPH3	6.73864	6.89439	7.02241	7.58186	7.6378	6.01197	7.10519	7.27632	7.20499	7.35495	7.59339	7.32607
8035905	ANKRD27	5.92709	5.85407	5.90707	5.48461	5.57445	5.386	5.53934	5.80353	5.62887	5.25265	5.53755	5.32392
8164701	SETX	6.62869	7.34265	7.39925	8.1073	8.31227	5.73755	7.23882	7.31597	7.45217	7.76822	8.13167	8.10159
7905116	PLEKHO1	4.09957	6.44582	3.88545	7.4326	7.58221	6.6706	7.67015	7.53464	7.45236	6.6784	7.51939	7.3152
8127130	GCM1	4.0552	5.04281	4.46476	5.60687	5.37099	4.38194	3.79109	3.78955	3.47084	5.39533	5.90803	5.39576
8084092	NDUFB5	5.96538	6.02937	5.8264	5.22051	5.21085	4.9443	7.99667	7.88556	7.8105	5.11832	5.0432	5.62652
8117535	HIST1H2AG	7.31134	7.10878	7.88629	6.61035	5.60087	4.96026	6.13968	6.66365	6.50999	5.9535	5.93573	6.55671
8081758	GRAMD1C	3.86879	4.763	3.85873	5.98395	6.06414	4.58492	3.24246	3.71868	4.0253	5.60135	5.00223	5.49262
7929132	PCGF5	4.78915	5.2352	4.49536	5.2798	5.17574	4.18808	5.0098	5.45194	5.50341	5.47729	5.93495	5.83563
7920659	KRTCAP2	6.41376	6.34514	5.82133	5.21313	5.49554	3.0953	6.65772	6.8366	6.56303	5.00762	5.45721	5.56314
8129108	ZUFSP	3.97436	3.74891	3.65542	3.24521	3.4793	4.38811	4.6124	4.5579	4.36253	3.29063	3.06218	3.26683
7983335	CTDSPL2	5.78913	5.85066	5.90085	6.54884	6.76274	4.27616	6.83137	6.82702	6.93334	6.25856	6.30221	6.39322
8018288	ATP5H	8.32085	7.8021	7.77543	7.11112	7.46883	5.59916	8.51956	8.46618	8.66297	7.32996	7.09562	7.28403
7996403	C16orf70	7.285	6.90518	7.84009	5.84728	6.17021	4.52581	7.75704	7.57524	7.62253	6.48024	5.61523	6.4435
8080198	PPM1M	9.35572	8.42953	8.96433	8.07584	7.86826	5.57734	8.10062	7.97701	7.79084	7.43748	7.90992	8.20992
8180034	TAP2	6.85919	7.77436	7.6066	8.33441	8.86179	6.65091	7.15017	7.77341	7.50164	8.31866	8.76374	8.5178
7990528	SNUPN	5.25372	5.25242	4.88879	4.60989	4.73722	3.7534	6.33185	6.2378	6.4644	4.25154	4.58941	4.62311
8042953	POLE4	7.27701	6.80365	6.389	5.41899	5.25991	4.97199	8.41415	8.20611	8.03942	5.6924	4.5539	5.93777
7967420	SBNO1	7.45197	6.83597	7.27454	6.71864	6.56797	3.9893	6.38194	6.46929	6.09733	6.34181	6.17966	6.64085
7965627	LTA4H	7.86052	9.08888	8.87544	6.70777	6.84035	4.77268	8.82948	9.0224	8.91329	6.83742	7.20205	7.78909
7989323	BNIP2	8.71955	7.71521	7.85805	7.1869	7.09612	4.37494	7.80205	7.75916	7.61737	6.77707	6.635	7.43025
8114567	PFDN1	5.12698	4.57362	4.55304	4.56781	4.43132	3.52094	6.48603	6.32892	6.17416	3.93985	4.13641	4.03765
7946812	RPS13	8.93814	9.10477	8.32728	8.197	8.70045	7.40454	10.6987	10.9006	10.6008	8.05184	7.68014	7.87077
8072610	FBXO7	8.12929	7.4278	7.35198	6.59388	6.98054	5.2849	8.39261	8.61524	8.29742	6.57265	6.70134	6.91326
8177635	AK6	5.68663	5.27131	4.97792	4.66033	5.00297	4.68228	6.64153	6.61081	6.53543	4.59023	4.64578	4.43347
7954701	METTL20	4.11423	3.96803	3.80137	3.48458	3.69157	4.96401	3.49843	3.52574	3.22372	3.16359	3.54131	3.27315
8093150	---	2.64387	2.86488	2.7127	3.35894	3.24011	4.69262	3.04847	2.83303	3.24783	3.32947	3.44379	3.19907
8166266	NHS	4.94007	5.33288	4.88514	5.9383	5.97816	4.76505	5.55531	4.94891	5.34673	5.74799	5.71299	5.99795
8109750	---	9.33463	10.245	8.37263	8.18224	7.851	3.69372	11.8686	12.0165	11.9378	7.0185	7.0392	8.2693
8152323	EIF3E	5.79288	4.22205	4.44485	3.64009	3.17482	3.9404	8.43325	8.26455	7.80169	2.98588	3.24164	3.55289
7999834	ARL6IP1	9.73606	9.23573	9.49264	9.41813	9.48938	7.00899	9.52465	9.44435	9.68526	8.57105	8.93918	8.93337
8031893	ZNF8	4.37926	4.1163	4.47133	4.6962	5.27247	4.29088	4.50689	4.53815	4.45542	4.98703	5.34431	4.90282
7914296	PUM1	7.95456	7.44076	7.67217	7.25708	7.22441	6.57873	8.43958	8.37592	8.31539	7.0651	7.07692	7.18168
8108873	ARHGAP26	9.8161	10.036	10.1792	10.5245	10.459	8.3227	8.99615	9.19936	8.90462	10.4531	10.5987	10.8017
8133209	SPDYE1	5.13111	5.21244	4.7027	5.29913	5.58289	5.87159	5.1639	5.0057	5.08519	5.55658	5.65629	5.85163
8099797	RELL1	7.1808	6.87716	7.12882	7.81776	7.78798	6.64213	6.58154	6.51714	6.25108	7.92387	7.47398	7.72096
8052803	AAK1	8.59257	7.37803	7.97498	7.2493	7.29967	5.18134	7.554	7.27119	7.53074	6.74302	6.8851	7.09403
7949277	ATG2A	6.52461	7.54006	6.8129	7.82791	8.45316	5.31796	6.14449	6.03315	6.14661	8.17737	8.0609	7.81356
8091452	TMEM183B	9.06813	8.81924	8.47571	8.41667	8.55156	5.87521	8.6641	8.75006	8.84074	8.10412	8.1107	8.22986
8114193	SAR1B	7.53197	5.54981	6.30205	5.21647	4.70369	4.71401	6.49863	6.46152	6.88425	4.82306	4.75538	4.80685
7976216	C14orf159	5.57222	8.12059	7.55193	8.92437	9.2705	6.2561	7.18804	7.05357	7.45957	9.05657	9.37343	9.21503
8072577	YWHAH	8.86201	8.52799	9.12896	8.01729	7.13761	5.57715	8.75319	8.32161	8.53757	7.814	7.46145	8.04906
8011011	YWHAE	11.0843	10.5293	10.7928	10.4283	10.3956	9.25655	11.6979	11.617	11.7272	10.0324	10.2336	10.2733
8120043	RUNX2	4.9743	5.67266	5.59838	6.41901	6.65853	4.97391	5.46601	5.05806	5.40732	6.04938	6.70916	6.33781
8178841	TAP2	6.67507	7.60935	7.42287	8.13279	8.65944	6.57544	6.94424	7.57255	7.28155	8.15371	8.62781	8.28851
8038809	NKG7	10.6477	10.2627	8.62046	7.48735	7.07695	6.15248	6.02593	6.62525	8.90791	6.68949	6.71901	7.32524
8113220	ELL2	7.17521	7.07262	6.575	6.34405	6.2861	5.63396	6.00697	6.20644	6.06453	6.31388	6.13746	6.34666
8119926	TMEM63B	6.08134	5.80417	6.358	5.93234	5.84664	5.00167	6.25773	6.14665	6.05636	5.486	5.24479	5.55203
8059672	---	8.21919	7.73575	7.70592	7.35464	7.44435	6.46984	9.81109	9.79982	9.62497	7.4289	6.79483	7.08278
8040036	RPS7	5.57898	5.60189	5.34485	5.18554	5.41383	5.09456	7.07249	7.02862	6.9251	4.84161	4.64654	5.14679
7921228	ETV3	7.76099	8.06056	7.74323	8.4066	8.5228	7.09401	8.43545	8.3079	8.52885	8.2875	8.44094	8.44939
8150089	SARAF	8.95979	8.9632	8.77443	9.51228	9.67317	6.55099	8.9258	9.21787	9.05668	9.68539	9.24842	9.60314
7897745	AGTRAP	9.27717	9.60424	9.58053	8.47367	8.51705	4.19103	8.79424	8.92283	8.85268	8.72635	8.58644	9.14867
7904254	ATP1A1	8.91533	7.82948	7.34382	7.00128	7.13337	6.16881	9.26816	9.26649	9.26366	6.23304	6.49388	7.05249
8023415	TCF4	5.52874	4.38854	4.63384	4.00988	4.06771	4.96091	5.17448	5.50123	5.09345	3.7847	3.77196	3.84582
8096224	AFF1	8.49733	8.90541	8.87385	8.6885	8.84049	6.66426	7.8027	7.87643	8.01535	9.18863	9.4758	9.45716
8140814	SLC25A40	8.08266	6.27107	7.68141	5.94219	5.28378	5.02236	6.95944	6.88547	6.38565	5.44499	5.58745	5.93001
7948574	CPSF7	7.58526	7.49372	7.32346	7.85572	8.04575	4.85638	7.10452	7.22764	7.31444	8.02732	7.88164	8.37101
8143725	ZNF746	8.02259	8.23831	8.37853	8.82599	8.8002	8.11539	7.59636	7.47209	7.64595	8.73964	8.63089	8.87802
8117334	HIST1H4A	5.22928	5.56485	4.9881	6.07517	6.23771	5.99874	5.59561	5.87211	5.66036	6.12603	6.04394	5.74762
7922912	TPR	7.06155	7.05271	7.20368	7.6272	7.70527	5.28532	6.5069	6.43403	6.47809	7.45744	7.63245	7.57254
7976128	TTC8	4.17858	3.55	4.00238	3.01007	3.23219	3.5185	3.27339	2.99415	3.05248	3.33493	3.02728	3.17907
8164067	PSMB7	8.51431	8.26762	7.46302	7.2953	6.87909	5.1543	9.22914	9.22991	9.22502	6.75413	6.95383	7.3268
8056716	METTL5	5.75377	5.56937	5.49734	5.04972	5.07151	5.63843	5.75363	5.98455	5.5819	5.09248	5.11361	4.76936
7935810	NDUFB8	8.22735	7.96319	7.47462	6.97809	6.14975	7.68428	8.6731	8.8974	9.17875	6.96443	6.5395	6.93036
7932160	FAM107B	8.67693	7.74521	8.29278	7.25398	7.25921	6.02159	6.64646	6.71943	6.47337	7.35045	7.0426	7.55669
8156373	FGD3	8.11166	8.57337	8.53821	8.99714	9.02942	5.82864	7.14149	7.14648	7.07783	8.986	8.92851	8.99714
7925759	OR2T27	2.99919	3.04817	2.94262	3.28127	3.18324	4.1661	3.16325	2.98429	3.2491	3.69227	3.31493	3.65732
8010137	SCARNA16	6.54577	6.98025	6.7989	7.2088	6.4851	7.17424	6.88745	6.33924	6.39919	7.79004	7.47969	7.83046
7940667	SNORA57	7.04194	7.18724	7.07194	8.11669	8.24573	8.05171	7.64763	7.52888	7.30792	7.61112	7.95854	7.54016
7926622	SPAG6	3.43724	3.25559	3.32082	3.74577	3.85633	4.19466	3.00727	3.40972	3.11131	4.22403	3.69553	4.40063
8154765	DNAJA1	8.55799	8.98943	8.43854	9.73748	9.74149	7.44413	8.79393	9.10201	8.78175	9.30875	9.49541	9.23177
7992219	BAIAP3	4.6764	4.93538	5.35103	5.44932	5.93991	5.0214	4.62591	4.58393	4.77046	6.23803	5.71882	5.68583
7953021	ADIPOR2	7.66965	7.63984	7.54823	7.10739	7.20797	5.82016	7.75667	7.79885	7.89347	7.12688	7.21706	7.2073
8106776	COX7C	8.51116	7.71228	7.50347	6.94265	6.85841	4.77278	9.58126	9.7793	9.97066	7.17957	6.48131	6.82418
8146000	ADAM9	8.44421	6.46652	7.47477	5.04756	5.55116	5.16208	6.27232	7.1164	6.71169	5.6456	5.00782	6.06369
8023165	HDHD2	6.67668	5.90743	5.24925	4.47593	4.99199	5.20101	6.85107	6.37824	6.35084	4.62874	4.54068	4.77574
8040163	IAH1	7.45374	7.18152	7.13774	6.22448	5.35374	4.73656	7.76501	8.07427	7.85756	6.49833	5.74327	6.39838
8160033	SNRPEP2	6.30763	6.81637	6.68175	6.33108	5.80574	3.95685	7.90831	8.21822	7.86949	5.9004	5.51818	5.92807
7944716	---	2.16753	2.29164	2.02798	1.86885	2.18676	5.57153	2.49537	1.89173	2.00789	3.05362	2.91298	2.73239
8087433	AMT	6.84318	5.9809	6.4233	6.31465	5.65646	5.97289	6.2477	6.42713	6.66352	5.4828	5.52482	5.32502
7901951	PGM1	7.86664	7.39981	7.90605	6.78751	6.7059	5.8994	6.40865	6.35421	6.20748	6.54484	6.6827	7.3297
8133770	CCDC146	4.93084	5.50922	5.13487	5.77287	6.19747	4.43632	4.70458	4.45274	4.5822	5.71542	7.23865	6.67206
7937483	SNORA52	5.22658	5.47843	5.62578	5.65955	5.82383	4.8936	5.4879	5.74837	5.74357	6.33486	5.93254	6.00272
7903474	---	8.00197	6.79696	6.4943	5.73599	5.16233	4.26126	7.4474	7.8488	7.84494	5.58199	5.60347	5.90296
7991772	HBQ1	5.34043	5.4593	5.22834	5.55531	5.72153	5.46301	5.16909	5.14107	5.17716	5.76239	5.78045	5.8533
8049528	LRRFIP1	11.8036	12.1239	11.4041	11.2777	11.6301	10.6876	12.0113	11.7611	11.8519	10.8765	10.9255	11.1792
8154207	---	10.3777	10.2597	10.7164	9.47601	8.90934	9.40208	10.1352	10.1311	10.4153	9.52019	9.86961	9.6545
7908861	OCR1	5.21509	7.48209	6.49729	8.90185	9.10666	3.8247	5.46318	4.93788	5.36014	8.10764	8.7578	8.03042
7906775	HSPA7	6.57775	6.20865	7.4024	7.17871	7.15579	4.46564	6.3845	6.55567	6.14721	7.49442	8.06409	8.13729
7966148	SSH1	3.4107	2.71861	2.31154	2.21355	1.9889	3.77391	1.95785	2.05304	2.33559	1.69328	1.91216	1.84743
7912166	RERE	7.12163	7.56881	7.50497	8.041	8.0621	7.10355	6.80885	6.88366	6.93071	7.90026	8.35656	7.93173
7903162	TMEM56	3.6617	3.59358	4.40543	4.69791	4.47623	2.77124	2.58924	2.31982	2.91512	5.70152	4.49497	5.39987
7950990	SLC36A4	6.81941	5.93742	6.29884	4.59752	5.08451	4.68726	6.52754	6.49	5.85836	5.50886	4.8095	5.27824
7999496	ZC3H7A	6.71551	6.36537	6.79697	6.21139	5.94752	4.76255	6.40559	6.50842	6.64598	5.81521	5.76787	6.21568
8010686	ANAPC11	7.33536	7.12761	6.92399	6.62737	6.87614	4.61261	7.74226	8.10355	7.9165	6.20431	6.02057	6.72723
8061579	TPX2	4.2657	4.05036	4.4565	2.97309	3.25597	4.15182	3.38529	3.21616	3.16531	3.46732	3.21224	3.85558
8061262	NAA20	4.63556	4.71704	4.55556	3.81054	3.60848	4.8094	6.33884	6.5087	6.29152	4.29032	4.05477	3.92441
7958819	ERP29	7.76649	7.91206	7.36615	6.60209	7.05692	6.04504	8.59075	8.11133	8.4828	6.91919	6.92828	6.89263
8089249	RPL24	9.11209	8.92929	8.50434	8.48034	8.1533	6.13817	11.1296	11.1883	11.2198	7.87611	7.34026	8.33957
8104115	---	6.37815	6.89145	6.64791	7.89417	7.49933	6.37878	6.23033	6.2119	6.34387	7.15458	7.48136	7.31475
8156116	IDNK	7.5918	5.56132	6.17958	4.60336	4.82824	4.74776	5.24309	5.08822	4.90733	4.81736	4.88013	4.73394
7912086	NOL9	4.09776	4.09871	4.09154	3.585	3.53201	4.32213	5.82303	5.55985	5.59571	3.60996	3.71764	3.5705
8038792	ETFB	7.91795	7.82456	7.39413	7.03431	7.11273	7.0898	8.07208	7.66691	7.91404	6.7885	6.66267	7.26631
7919637	HIST2H2BE	8.60527	9.42603	8.84472	10.4076	10.1	6.44451	7.24802	7.41089	7.53903	9.6039	10.3281	9.86641
7987172	EMC7	7.80464	7.56143	7.917	7.09439	6.976	6.14085	7.74179	7.94761	7.93634	6.84837	6.99723	7.41282
7910494	ARV1	5.83298	5.94025	5.8907	4.95663	4.79477	4.60919	6.24571	6.49953	7.16914	5.0079	5.17772	4.94954
8032909	PLIN3	8.79299	8.54057	8.36452	7.76359	7.88001	6.28468	7.43101	7.70346	7.65679	7.59731	7.91979	8.12749
7987180	KATNBL1	5.11498	6.75158	6.28636	7.70955	6.88408	5.79327	5.53241	5.61075	5.42001	7.39012	7.46681	7.74408
8026122	RAD23A	6.51583	6.30926	5.44535	5.08579	5.39185	4.46919	8.01162	7.55233	7.8275	4.97195	5.06674	5.15217
8136293	EXOC4	6.20583	5.87487	5.90477	5.74289	5.62346	5.21281	6.82596	6.82478	6.8344	5.53717	5.51836	5.46449
8006319	---	5.87476	5.70251	5.66569	5.94694	5.98304	7.09509	5.49392	5.30358	5.51615	6.45222	6.1298	6.22644
8122554	RAB32	9.05316	8.17897	8.33587	7.19841	6.76652	5.35238	8.07654	8.10191	8.22146	7.55935	7.37366	7.83882
8079637	ATRIP	4.89945	5.43038	5.20831	5.4844	5.57298	5.54192	5.62159	5.54158	5.54423	5.62474	5.95392	5.80444
7968637	CCNA1	7.51393	4.71467	8.35054	3.44179	3.85388	4.20895	3.15707	3.36767	3.42304	3.90185	4.22198	3.76797
8076569	TTLL12	7.31225	6.99066	6.88722	6.21323	6.86014	4.93743	6.93465	6.84723	6.75175	5.78114	6.1072	6.55286
8104449	CCT5	8.49133	8.44145	8.43754	8.03099	7.78981	6.60149	9.26447	9.12624	9.141	7.61944	8.10501	7.91906
7906764	HSPA6	8.83146	8.91672	9.80197	9.62512	9.93507	7.9109	7.28971	7.34932	7.31559	9.8306	10.5959	10.3913
8175647	CD99L2	6.27163	5.54126	6.40475	4.8194	5.01845	4.80234	5.91345	6.09516	6.0611	5.00054	5.23703	5.38207
8044584	PSD4	7.35414	7.52215	8.0999	8.3786	8.50955	6.05612	6.71553	6.59797	6.94362	8.32733	8.57879	8.39699
8169898	RAB33A	6.82895	5.66591	5.82583	5.03128	5.27245	4.67509	4.89991	4.85519	5.06363	5.04889	5.0865	5.06489
8046306	GORASP2	6.49054	6.49214	6.58291	5.94203	5.64966	4.93126	8.39846	8.26046	8.10233	5.69189	5.84139	6.17089
7944382	VPS11	6.68358	6.26709	5.70103	5.60269	5.57855	4.63865	6.97644	6.97399	7.30947	5.29098	5.36384	5.36316
8013588	POLDIP2	7.06728	6.60558	6.74274	6.30115	6.51965	3.49493	7.00388	7.06299	7.15379	6.08478	6.1773	6.36059
8087473	IP6K1	6.23212	7.00089	7.20795	7.65449	7.42806	5.59779	5.81695	6.1167	6.20578	7.76721	7.739	7.70376
7964745	TMBIM4	9.1698	9.07879	9.01253	8.8733	8.39472	6.94832	8.5335	8.47311	8.47082	8.30765	8.43392	8.68432
7906978	MGST3	8.39096	7.23003	7.03968	6.16208	6.06603	5.883	10.0527	9.71828	10.5908	6.20202	6.44276	5.79064
7905043	FAM231A	4.84698	5.56354	5.6391	5.72479	5.27103	6.0229	5.32917	5.32329	5.3781	6.21447	6.1847	6.13559
8147970	EBAG9	5.72937	5.17993	5.78043	5.07512	5.25241	4.9245	7.08871	7.02731	6.92126	4.49209	5.10575	4.69212
8165665	COX2	10.6084	9.66967	9.97427	9.08138	8.88379	7.0349	11.0706	11.0502	11.4163	8.40467	8.7744	9.48919
8041015	SLC4A1AP	6.56949	6.37343	6.95351	5.93485	6.21583	5.4306	6.51208	6.45081	6.61682	5.89033	5.86324	6.13485
8038443	FUZ	6.19121	6.0017	6.18023	6.77401	6.9083	6.18825	5.56794	5.55335	5.36981	6.78298	6.43606	6.8975
8061136	PTMAP3	6.04249	6.66698	7.59035	6.24208	5.95032	5.02457	8.58258	8.1238	8.24404	5.43	5.41526	5.59083
7934898	ANKRD22	9.31681	8.03333	7.67476	5.88427	5.43738	4.84409	4.83022	5.40197	4.92711	6.9277	6.88941	6.87866
7975292	RAD51B	7.08175	5.01044	6.65647	4.71045	4.19065	4.82214	5.16425	5.61471	5.56385	4.38154	4.68621	4.41049
7925201	ARID4B	7.42903	7.73082	7.59088	7.96978	8.20871	4.80864	6.50864	6.54547	6.2711	8.1406	8.03466	8.20673
8007904	GOSR2	5.89188	4.56537	5.17372	4.41651	3.94194	4.20681	6.30958	6.53596	6.2295	4.27838	3.96005	3.86855
7910651	TBCE	3.95476	3.99221	3.86101	3.30637	3.60628	3.1085	4.46219	4.80275	4.7052	3.24229	3.50163	3.38949
7962499	SCAF11	7.03063	7.04615	7.06438	7.11831	7.15938	4.97357	6.66279	6.64686	6.74335	7.34925	7.55701	7.52264
7948504	VPS37C	6.19738	6.63775	6.55657	7.19759	7.32949	6.79646	6.73103	6.38167	6.72668	7.00491	7.04616	7.22358
8052626	VPS54	5.60199	4.30577	5.37857	3.67132	3.67073	3.92143	5.15459	4.49902	4.61243	3.94634	3.85157	3.87059
7935002	---	7.31873	6.96293	7.17167	6.42308	6.15517	4.44628	7.30129	7.63166	7.22112	6.11634	6.65111	6.5126
8156199	DAPK1	5.43936	7.17788	6.89393	7.35056	7.26242	5.72617	8.73056	8.90209	9.09844	8.00344	8.15295	7.77795
8140468	GSAP	5.18609	5.79263	5.16892	3.71198	3.23697	3.07774	6.40962	6.1835	6.30804	3.70865	4.21128	4.84737
7966035	CKAP4	8.30504	8.34882	8.22375	7.62983	7.52953	6.67446	7.1484	7.23088	7.34103	7.60761	7.27453	7.97996
7990511	PTPN9	5.81118	5.27831	5.44438	4.76047	5.06612	4.988	6.07627	6.70713	6.48723	4.62089	4.73094	4.8456
7931728	LARP4B	8.1029	7.74454	7.85785	7.21116	7.24149	3.64242	7.56693	7.63316	7.79678	7.26121	7.17722	7.54223
7976200	CALM1	9.19049	8.65169	8.71576	8.53321	8.49012	6.8073	8.35744	8.27273	8.3669	8.11573	8.24063	8.36407
7914112	FGR	10.7412	10.5852	10.7903	9.58176	9.58207	7.11681	9.85834	9.94257	10.0256	9.86894	9.83334	10.4365
7965681	IKBIP	5.7513	6.41405	6.44991	6.79381	7.21961	5.30426	5.59386	5.5209	5.80862	6.77667	7.27865	7.22635
8037579	ERCC1	5.13531	5.3711	5.18235	5.86597	6.12245	6.59599	7.14567	6.95539	7.43379	5.9077	5.83838	6.71882
7987642	NDUFAF1	6.16891	5.82748	6.44144	5.43003	5.47232	4.33456	5.74899	5.65747	5.69232	5.40231	5.27916	5.71213
8119000	MAPK14	9.90019	8.84343	9.83078	7.96319	7.73585	4.88249	7.36281	7.02805	6.98468	8.09522	8.40599	8.73563
8035236	HAUS8	3.95443	4.03811	3.98249	4.56388	4.78523	4.84144	4.26104	4.32085	4.27232	4.49992	4.7211	4.31381
7905754	ATP8B2	4.19567	3.7994	3.91007	4.40527	4.51847	5.12094	3.94966	3.79686	4.21985	4.4423	4.93748	4.60417
8069541	SAMSN1	9.10043	7.42441	8.6156	5.89517	5.6158	5.84601	5.54487	5.93488	5.90878	7.42531	6.11701	6.54401
7918552	FAM212B	5.5929	6.25046	6.32795	7.08819	6.89908	5.29289	4.31385	4.80739	4.21785	7.00875	6.84951	6.90349
8128867	CDK19	7.55005	7.91643	7.9642	8.71258	8.58318	6.28471	7.41939	7.09003	7.31118	8.40564	8.28053	8.63916
7949792	PTPRCAP	5.63215	6.06094	6.0456	6.3812	6.31971	7.1497	6.02588	6.12435	6.22792	6.48725	6.58803	6.37169
8057898	HECW2	3.49264	3.2544	3.64489	4.43082	4.15965	3.81921	2.93227	2.79252	3.25592	4.33599	3.88981	4.4379
7956159	RPL41	4.1214	4.31363	3.91169	5.14781	5.45484	2.7114	4.75978	5.00124	4.87247	4.6214	5.58315	4.89485
8031792	ZNF211	4.40743	4.43898	4.3666	4.88704	5.01307	4.6912	4.53995	4.74562	4.49722	4.73637	4.94069	5.00455
7959173	RNF10	10.4494	9.27907	10.0566	8.65526	8.71204	6.78416	7.77157	7.67476	7.85152	8.82621	8.63572	9.18736
8027139	RFXANK	7.67658	7.44312	7.08473	7.09376	6.86379	3.7534	7.18085	7.0416	7.4301	6.70338	6.74115	6.746
8047565	FAM117B	5.39469	6.43488	5.12626	7.58554	7.50405	5.1692	8.4448	8.62087	8.76479	7.08054	6.44045	7.23681
8155930	GCNT1	6.0125	5.42402	6.89021	5.02674	4.80618	5.43824	5.47654	5.85142	5.33789	4.60698	5.04687	4.88784
8055476	---	8.52164	7.93043	8.02181	7.53921	7.72581	2.93046	9.45041	9.38864	9.158	7.18281	7.6684	7.3761
7961900	ITPR2	7.71258	7.80475	7.48407	7.2963	7.01455	4.89167	6.93019	6.74082	7.09881	6.989	7.17736	7.09592
7974366	PTGER2	8.44379	5.37502	7.03823	4.5051	3.98217	4.48678	7.20061	7.73608	7.01875	4.41577	4.8369	4.41359
8074316	GGT1	7.76683	7.6289	7.55051	7.05598	7.50036	6.5739	6.86804	6.73374	6.71008	6.95711	6.76465	7.26148
7936091	USMG5	8.03486	7.79834	7.51136	7.25735	6.82773	6.35319	8.20463	8.18169	8.03443	6.86782	6.91857	7.33326
8108066	UBE2B	9.31676	9.46275	9.46685	9.81833	9.7359	7.57311	7.96073	7.90264	7.90363	9.81913	9.82024	9.8445
8075477	RNF185-AS1	3.11032	3.26433	2.77836	3.80628	3.90919	3.63021	3.24782	3.50158	2.95406	4.04415	3.6539	3.67435
8050548	LAPTM4A	11.0885	10.9623	10.4338	10.4252	10.4129	8.56963	10.7823	11.0937	10.7244	9.85904	10.1148	10.2448
7983413	DUOX1	3.23262	3.4087	3.27735	3.28058	3.34299	5.04189	3.15857	3.35735	3.49766	3.81351	4.06959	3.69711
8009380	SNORA38B	7.04226	6.09187	6.61825	6.7891	8.26763	7.76937	6.59694	6.47837	6.5185	7.85572	8.0196	9.47167
8090091	HACD2	5.81925	6.47738	5.62636	4.74754	5.1441	5.59787	7.7684	8.1034	7.12761	4.50361	4.71015	5.15082
8013179	ATPAF2	6.52514	6.09288	5.80117	5.76648	5.72016	3.55433	7.41992	7.08251	7.3544	5.61255	5.20042	4.70746
8015955	ATXN7L3	7.22697	6.82638	7.31934	6.51652	6.92311	5.07596	6.02078	6.36461	6.1644	6.43436	6.20523	6.57449
8001149	VPS35	7.46796	6.69099	6.94778	6.07443	6.16054	4.50438	6.96981	7.06902	7.22447	6.2389	6.22518	6.42711
8076424	CYP2D6	5.43216	6.18225	5.98738	6.4117	6.38592	7.01718	5.99266	6.04021	6.00414	6.69702	6.69968	6.39722
8086148	---	8.27811	8.34313	7.8055	7.56612	7.37499	4.7957	10.7512	10.7797	10.4751	7.00061	7.20351	7.7169
8070194	RUNX1	8.46129	7.37947	8.28388	7.11194	7.12422	5.56132	7.61163	7.80832	7.68292	7.07373	7.20338	6.99371
8019687	ANAPC11	7.4492	7.13384	6.97268	6.73574	6.90844	4.76053	7.8111	8.20705	7.99803	6.17306	6.04761	6.80038
8046546	HOXD8	3.04309	3.33379	3.30927	3.35469	3.40215	4.63629	3.38306	3.09097	3.38552	3.57616	3.95479	4.13183
8021470	PMAIP1	3.92569	5.68505	4.03241	6.74649	6.66646	5.05127	6.33854	6.29887	6.48453	5.88602	6.22545	6.06823
7914334	SNRNP40	4.92672	4.72384	4.50613	3.86375	4.03939	1.76281	6.01743	6.19226	6.48714	3.42187	3.6231	4.33218
7961230	YBX3	4.81949	6.0412	6.32666	7.84903	7.32452	6.43311	10.3649	10.3066	10.1309	7.49345	6.94816	9.22765
8034843	NDUFB7	8.1601	7.72162	7.62616	7.00024	7.15527	7.22767	8.78473	8.62591	8.54712	7.30344	6.76034	7.22957
8030539	TBC1D17	5.55652	5.73526	5.87803	6.22631	6.45058	5.3198	5.93337	5.90892	5.63851	6.34899	6.18149	6.28153
8145440	PPP2R2A	6.17889	6.42353	6.42253	6.96073	6.70375	4.99019	5.70124	5.84017	5.9294	6.88111	6.88857	6.78164
8035494	FKBP8	7.66178	7.57158	8.14196	8.24282	8.57549	6.64756	7.06047	7.26016	7.08466	8.3206	8.48787	8.68577
7926596	COMMD3-BMI1	5.55662	6.37048	5.82913	5.06305	4.61314	5.38356	7.48142	7.24522	7.17417	4.96443	4.55167	5.29598
7928444	VCL	7.22159	6.56579	6.99208	6.13319	6.04273	5.20687	6.59767	6.52868	6.59024	5.91221	5.92093	6.52785
8106181	BTF3	7.16961	6.96055	6.76371	6.52784	6.48097	5.53096	8.06873	7.81178	8.02448	6.18277	6.48333	6.48455
8083183	U2SURP	7.19828	6.68208	6.86981	6.48994	6.40403	4.02222	7.50059	7.83734	7.59358	6.37254	6.13367	6.35793
8137240	GIMAP7	3.42324	3.75543	3.9553	4.45201	4.33947	4.39928	7.20982	7.00019	6.97794	4.32226	4.19078	4.47401
7965812	GNPTAB	6.61324	6.47979	6.16351	6.00113	6.2112	5.43878	7.57914	7.46266	7.76225	5.40994	5.33648	6.0627
8008870	VMP1	11.5447	11.9405	12.1304	12.5221	12.3873	10.8174	11.3194	11.3429	11.2558	12.5093	12.417	12.4692
7961767	C2CD5	7.2115	6.30002	7.57235	6.03723	6.73059	4.75139	6.58648	6.70422	6.71272	5.84574	6.01948	5.72277
8121884	---	5.5312	5.86767	6.36586	5.23901	4.62239	5.03667	4.98417	4.80515	4.61284	4.97624	4.99825	5.10909
8111698	RICTOR	7.19187	8.47292	7.95556	9.04039	8.91401	5.32392	6.13034	6.51769	6.29936	8.80112	8.9839	9.03277
8054800	---	2.22165	2.47179	3.19364	2.8069	3.28186	2.84865	1.92468	2.43836	2.23959	3.46136	4.04291	3.58087
7949019	---	2.98525	2.8893	2.3107	1.70966	1.94176	4.6729	2.12183	1.92688	1.83587	1.79801	2.13836	2.00551
7953749	CLEC4D	10.0472	8.30021	8.7301	7.2475	6.57846	5.94076	6.81998	6.79279	6.49138	7.69663	7.49166	7.41044
8075720	APOL2	4.9368	5.86006	5.40235	6.05385	6.3626	5.03038	4.51306	4.94813	5.4246	6.56982	6.87775	6.19723
7916910	LRRC40	3.63823	3.25465	3.11585	2.88188	2.74477	2.90817	4.28046	4.17654	4.18471	2.74389	2.82764	2.7394
7902789	HS2ST1	6.70261	5.40505	6.04976	5.1336	4.76131	3.83175	5.39613	5.19872	5.64469	4.9018	4.33155	5.15905
8150872	RPS20	10.3398	10.5364	9.8464	9.85136	9.61941	7.6901	12.4541	12.3903	12.4657	9.1353	9.33498	9.78871
8053610	LOC285074	7.667	8.34643	8.11253	9.02528	8.99771	4.75373	8.82454	8.54913	8.65623	8.70466	8.59824	8.9367
8135933	FAM71F2	5.3247	5.24268	5.40719	5.84518	6.19248	4.93116	4.75613	4.40936	4.34743	5.81836	5.92508	5.96806
8074569	GGT1	6.80331	6.64554	6.58955	6.20457	6.57388	6.21759	5.93639	5.92156	5.83482	6.10587	5.92883	6.30396
8178552	C6orf47	6.11956	6.02283	6.05569	6.24606	6.26482	5.56075	5.81667	5.99044	5.91075	6.47735	6.41449	6.57982
8179808	C6orf47	6.11956	6.02283	6.05569	6.24606	6.26482	5.56075	5.81667	5.99044	5.91075	6.47735	6.41449	6.57982
8132070	GARS	7.43916	6.97162	7.07937	6.68851	6.71079	5.09118	8.07204	8.21956	7.78358	6.16979	6.27955	6.76091
8143471	CLEC5A	6.07519	6.51394	5.8234	4.49637	3.6206	4.77827	4.66317	4.14248	4.04534	4.16341	4.4848	5.49282
8025826	---	5.12796	4.97474	4.90785	5.41777	5.32121	5.61796	5.67792	5.10084	5.82131	5.73078	5.89359	5.57349
7953243	NDUFA9	7.44403	6.25768	6.18802	5.15422	4.60025	5.90305	8.68609	8.79666	8.74658	5.75325	5.09104	5.26054
8121825	RNF217	4.86823	5.17805	4.78844	4.26083	3.87507	5.17117	5.15273	4.5613	4.86242	4.10845	4.08674	4.40223
7983191	ADAL	3.48051	3.59959	3.41671	3.10042	3.60513	4.25291	3.92264	3.98221	3.87674	2.80153	2.9005	3.05842
7927732	ARID5B	7.97175	6.01352	7.50783	5.1366	5.46474	4.83217	5.1177	5.72596	5.69857	5.6695	5.39992	5.53663
7948741	B3GAT3	7.63074	6.7391	7.13063	6.45483	6.38956	4.50805	7.38518	7.40438	7.27281	5.65217	6.40654	6.45536
8068100	LINC00189	3.40389	4.11075	4.44274	4.31115	4.72651	3.39323	3.55144	4.29071	5.36142	5.43377	6.3982	5.45481
7974404	CDKN3	3.26466	3.5348	3.46996	3.09414	2.49356	4.26522	2.90783	2.8333	2.89002	2.99744	2.58367	2.58542
7920873	SNORA80E	6.97039	6.33785	6.77451	7.9139	7.89586	6.23287	6.80526	5.99976	6.55181	8.08039	8.04296	7.22836
7937798	---	7.08003	7.00123	6.24416	6.26306	6.85571	5.81316	7.61325	6.72626	6.69353	5.40736	5.71044	5.68148
8085081	CRBN	8.71279	7.67727	8.43902	7.36402	6.99948	4.85978	8.08843	8.44966	8.16089	7.26111	6.9462	7.53624
8156601	ERCC6L2	8.09153	7.08495	7.89088	6.58147	6.41324	5.84072	7.46122	7.16009	7.48574	6.67037	6.93285	6.69552
7962935	PRKAG1	8.49155	8.31293	8.44101	7.78694	7.94928	4.94205	8.33877	8.37037	8.1804	7.80395	7.96537	8.04755
8019910	---	3.57362	4.42603	4.663	5.70728	5.70488	5.10841	2.41916	3.25177	2.68613	5.33076	5.66524	5.13443
8066697	SLC35C2	7.31612	7.70886	7.24982	7.03941	7.0587	5.25138	7.13074	7.21748	7.00141	6.8488	6.87375	6.91969
8112687	COL4A3BP	7.63529	6.88329	7.47585	6.82718	6.60477	4.66267	6.65804	6.6363	6.55396	6.65917	6.33408	6.71216
8010915	FAM101B	8.96511	8.86346	8.76228	8.16915	8.49162	6.45577	6.76264	6.80993	6.72751	7.99001	7.58688	8.5341
8078270	RPL15	8.58542	8.59288	7.67779	7.66278	6.84446	4.59567	11.2892	10.7802	11.1845	6.86775	6.66798	7.51867
7960518	TNFRSF1A	9.35809	9.69589	9.92547	10.1233	9.95449	7.91629	8.93266	8.74179	8.73573	10.1004	10.3708	10.4441
8140840	STEAP4	9.631	9.30403	9.74742	10.1266	10.2464	7.9864	7.23062	7.30296	7.05992	9.90583	10.4544	10.3799
7955719	---	6.00181	5.2991	5.67913	4.57161	4.95032	4.07904	5.08931	5.36963	5.15398	4.88943	4.81081	5.06276
8148715	GPAA1	7.52257	7.22318	7.20607	6.97889	7.2754	5.71603	7.19234	7.16279	7.02304	6.9098	6.72043	6.68182
8019912	EMILIN2	8.66323	6.9871	7.75491	5.96617	6.11005	6.43877	7.96235	8.03196	8.0189	6.18344	6.37015	6.81694
8168557	SH3BGRL	9.31109	8.8415	8.35287	7.31765	6.62379	4.48747	9.11224	9.17331	9.43645	7.45942	7.20759	8.20571
8168359	NHSL2	6.83552	7.52464	8.04383	8.56841	8.67733	6.83241	7.05096	7.27281	6.80883	8.21363	8.64618	9.06494
8022625	SS18	6.38589	5.90033	6.10306	5.53922	5.20658	5.05023	6.93034	7.21003	6.91951	5.21092	5.10941	5.73571
8133809	RSBN1L	6.29405	6.75582	7.18228	7.57588	7.39417	6.27997	5.99225	6.3895	6.02721	7.56795	7.43758	7.75894
8107855	---	5.85549	5.97739	6.14955	6.10563	6.17817	9.1389	6.26273	6.07896	6.23686	6.66886	6.60144	6.30914
8023043	PSTPIP2	9.01607	7.99069	9.22917	6.79442	6.56106	4.57946	7.0599	7.06236	7.31982	7.95699	7.5309	7.15644
8013581	IFT20	8.00585	7.03394	7.19873	5.95287	6.07901	5.38602	6.65488	6.79527	6.84568	6.55132	6.03251	6.70051
8156604	ERCC6L2	6.05546	5.28994	5.72515	4.98065	4.54117	4.82691	5.46132	5.36424	5.71296	4.98868	4.70639	4.95111
7999553	CPPED1	10.0311	10.8649	10.7683	11.4306	11.3821	8.65629	10.4281	10.3282	10.4061	11.2008	11.3199	11.849
7989253	SLTM	7.87487	7.35059	7.64999	6.96436	7.18631	4.66053	7.51721	7.15872	7.67087	6.78593	6.7385	7.13809
7940070	C11orf31	5.33824	5.66726	5.33001	4.75842	5.1032	5.45	6.4948	6.26297	6.30892	4.86903	4.80853	4.96178
7924184	FLVCR1-AS1	4.51936	4.40625	4.43155	5.53117	5.52916	4.24736	4.18075	4.76706	4.00362	4.90826	5.43247	5.50047
8025103	ADGRE1	8.01025	7.81709	7.43231	6.51937	5.67351	4.34112	7.09591	7.12954	7.1253	4.86945	7.03177	6.10466
8073430	ACO2	6.48311	6.30466	6.19105	6.0906	6.03905	4.96515	7.50282	7.62032	7.68783	5.776	5.72774	5.99206
7933047	CUL2	6.07249	5.41607	5.53794	5.21806	5.03754	3.43834	5.94858	6.21992	6.22719	5.18133	4.56921	4.86864
8105067	PTGER4	5.21933	7.06278	6.1532	7.36332	6.74559	6.03977	6.96044	7.05572	6.9248	7.64302	7.54599	7.55722
7930304	GSTO1	8.62229	8.341	8.25574	6.8922	6.22957	6.32623	9.01663	8.99394	8.87699	7.02363	7.60527	7.86664
8162744	CORO2A	6.8529	6.58078	6.86562	5.54821	5.28297	4.68675	5.5348	5.28162	4.01268	5.39955	5.52632	5.58951
8117458	BTN3A1	5.2761	7.59826	7.80666	8.82644	9.15128	6.75207	7.17333	7.64843	7.95573	9.0016	9.39342	8.78112
8147244	NECAB1	6.39887	3.25234	6.65583	3.00003	2.68829	3.50141	2.82623	2.46499	2.37945	2.64715	2.3677	2.9527
7914834	PSMB2	7.46992	7.12215	6.80981	6.37472	6.21904	5.24765	7.94949	7.82781	8.07436	6.08275	6.57401	6.5203
8071206	MRPL40	4.88736	4.76567	4.9718	4.21402	4.37957	5.23675	6.39538	6.19101	6.41854	4.40689	4.4387	4.41102
7926084	ATP5C1	8.50174	7.62717	7.96897	7.30312	7.15915	3.61569	9.01766	9.00329	9.10523	7.33756	7.10166	7.35689
8141094	PDK4	3.89487	3.47594	3.83617	4.20057	4.34169	4.75383	6.08293	5.87433	5.38059	4.46032	4.51904	4.3969
8126450	RPL24	8.8995	8.60594	8.23518	8.08211	7.74467	5.24776	11.0206	11.0092	11.0303	7.60358	7.0352	8.10653
8090518	KIAA1257	4.95211	5.7195	5.80246	6.21466	6.37084	4.26001	4.73564	4.38675	4.83601	6.40872	6.18354	6.48875
7919625	HIST2H2BA	9.47162	10.4619	9.92083	11.0273	10.7045	7.67625	8.92316	9.21374	8.85882	10.6841	11.2316	10.8174
8091562	DHX36	7.22881	6.69316	7.12048	5.77859	6.27175	4.942	7.26605	7.38916	7.18696	6.11826	6.00482	6.56218
7903188	PTBP2	7.16989	6.04078	7.40024	5.74031	5.31953	4.58472	6.28058	6.06409	6.32808	5.90509	5.52431	5.62293
8050702	TP53I3	8.59163	6.97228	9.01619	5.5829	6.25774	6.64755	7.38264	7.28706	7.12418	5.79163	6.19723	6.99411
8043310	RMND5A	6.61458	6.53551	6.97985	7.61998	7.95829	3.8509	6.6561	6.96122	6.79192	7.36879	7.19064	7.79891
7974461	LGALS3	7.04884	7.13751	6.93408	5.6822	5.77581	6.26526	7.68713	8.37918	7.93668	6.36048	6.44836	6.38021
8065832	TRPC4AP	8.048	8.14319	8.46793	8.76631	8.5587	5.19338	7.86794	7.80811	7.91841	8.69726	8.7302	8.78225
8159654	NELFB	6.93929	6.9433	7.14632	6.82257	6.52572	6.83728	7.33681	7.31821	7.66106	6.41799	6.5229	6.47065
7979864	ERH	10.2121	9.30974	8.93768	8.86959	8.93247	5.66516	10.1527	10.2142	9.91545	8.64448	8.00897	8.44117
7994102	DCTN5	6.84483	6.46107	6.90576	6.137	5.50961	3.99342	7.34774	7.64984	7.21684	6.18965	5.40376	5.8384
8056766	SLC25A12	6.69453	4.85925	5.90168	4.52028	4.3897	5.6648	6.12801	5.3798	5.98572	4.11879	4.14373	4.63144
8180317	---	4.34917	4.40916	4.73714	5.38675	5.15337	4.04784	6.35632	6.49006	6.75871	5.37636	5.15243	4.93727
8043251	PTCD3	3.95611	4.42414	4.59034	3.44077	3.70687	3.67687	6.94223	7.13687	6.91685	3.40845	3.64396	3.80486
8027473	PDCD5	7.33277	7.2631	6.77562	6.6976	6.92214	5.46624	7.99345	7.78081	7.92851	6.58299	6.55279	6.27371
8164464	ZER1	7.01944	7.14086	7.39131	7.59467	7.63038	5.50929	6.44883	6.2068	6.1962	7.69186	7.63783	7.73974
8091009	PIK3CB	7.39587	6.94608	7.79609	6.87676	6.61419	4.78795	6.63796	7.0322	6.74593	5.98488	6.27908	6.8614
7997863	ACSF3	5.14529	5.20219	5.01294	5.2855	5.23297	5.95956	5.5748	5.70352	5.87832	4.72849	4.63756	4.61542
8013860	TIAF1	6.5426	6.64544	6.98771	6.17546	5.92999	4.88719	6.48242	6.38897	6.74057	5.85208	6.23067	6.14851
7922418	GAS5	6.72832	6.44667	7.44296	7.9683	8.61013	7.15111	6.25197	6.63594	5.83633	7.96089	8.07999	7.86941
8063078	CTSA	10.2258	9.30669	9.94297	9.09799	8.9683	7.15782	9.44222	9.69465	9.46219	9.02984	9.09566	8.96207
8067305	SYCP2	6.71431	5.40449	5.56467	4.37192	3.78442	3.89447	4.13789	3.88481	3.50978	4.39833	4.32052	4.97386
8000263	COG7	5.47917	5.25474	5.29552	5.19139	4.67247	4.71439	6.13184	6.37804	6.14921	3.98175	4.80255	4.68641
7947396	CSTF3	4.24221	4.15585	4.44384	3.4362	3.57004	4.82403	4.94491	4.57304	4.26565	3.67842	3.61679	3.59695
8141133	SHFM1	8.90219	7.9836	7.44931	6.21731	5.66466	6.75267	10.1232	10.2549	10.1279	6.95187	6.67316	7.08845
8064502	SNRPB	7.60278	7.75576	7.25253	7.21847	7.12417	4.34366	7.97485	7.93302	8.0311	6.73523	6.88255	7.16319
8072735	APOL1	4.98353	5.84951	5.66407	5.72452	6.33001	4.46417	5.14965	5.50609	5.69257	6.96567	7.38451	6.09626
7967685	STX2	4.96469	4.73409	4.86355	4.17117	4.39937	3.73781	6.1262	5.80604	5.89846	4.39966	4.40031	4.02752
7999520	RSL1D1	5.32447	4.79989	5.01448	4.45722	4.6292	4.61601	8.70973	8.55782	7.65534	4.11262	4.07334	4.05708
8167449	PLP2	11.5783	10.4509	11.2938	9.86862	9.85427	7.43402	10.2935	10.3557	10.2937	9.58526	10.0309	10.445
8026440	RPL23A	8.59576	8.93467	8.46085	8.52473	8.29636	6.92077	10.8287	10.7791	10.6509	7.86191	7.90586	8.29936
7901513	SCP2	4.80659	4.96573	4.83305	3.95539	4.23378	4.03322	6.08248	6.7246	6.16958	4.34989	4.16986	3.95311
8121461	CDC40	8.74105	7.64922	8.13563	7.43562	7.24216	5.27769	7.86941	8.08701	8.118	7.0308	6.91128	7.56164
8136832	C7orf34	5.04389	4.88523	5.12699	5.43647	5.31594	5.34785	4.61311	4.5439	4.5921	5.9829	5.56527	5.35247
8048898	SP140	5.39479	6.97659	6.74382	7.11559	7.91835	6.40563	6.0865	5.99216	6.15416	7.43555	8.67733	7.90565
8032972	SNRPEP4	6.77722	6.93973	7.00284	6.98036	6.69067	4.55245	7.32868	7.19778	7.1235	6.51507	6.26452	6.41955
8110755	SLC12A7	4.40072	4.17895	4.16938	4.53239	4.47574	5.13027	5.914	6.34855	6.30398	4.80276	4.79656	4.75219
8038086	RPL18	9.62165	9.53429	8.8214	8.90517	9.16989	5.57287	11.7871	11.7473	11.7924	8.32469	8.34782	8.8056
8176076	DNASE1L1	5.96384	5.71047	6.49269	5.43069	5.6001	4.17348	5.9086	5.90573	6.10349	4.95566	4.88457	5.62231
8044333	LIMS3L	8.44278	7.33088	7.83172	6.64249	6.7824	5.99456	7.6863	7.59581	7.7808	6.73137	6.83673	7.20498
8054519	LIMS3L	8.44278	7.33088	7.83172	6.64249	6.7824	5.99456	7.6863	7.59581	7.7808	6.73137	6.83673	7.20498
8103911	IRF2	9.04204	9.41856	9.60278	9.55718	9.63758	5.45518	7.93031	8.12668	8.15458	9.78283	10.0695	10.0626
7945177	LINC00167	5.33563	5.57391	5.6115	6.13591	6.16129	5.77072	4.67096	4.85356	4.91408	5.83664	6.17357	6.06881
8104570	FAM105A	7.76173	5.9617	7.19189	5.02449	5.2898	4.12971	6.78899	6.7383	6.3599	4.87618	5.33151	5.95622
8051298	GALNT14	8.87009	7.42974	8.901	6.07457	6.11982	5.33894	4.87493	4.35318	4.14526	5.64386	6.78132	7.35034
7923798	NUCKS1	7.20316	7.47984	6.63663	6.33341	6.50711	5.60539	8.58919	8.4555	8.86032	5.52926	6.38106	6.34073
7921667	CD48	10.1479	9.98608	10.1217	8.57639	7.88831	7.20882	10.8136	10.8407	11.0309	8.18035	9.14425	9.49362
8088535	PSMD6	8.23688	7.56131	7.60203	7.3385	7.24026	5.40379	7.29897	7.2739	7.5182	7.27975	6.77715	7.05887
8076690	KIAA0930	8.73391	7.15514	8.77126	6.2513	5.98003	4.39785	8.54773	8.41014	8.68933	7.25991	6.43286	6.366
7958019	DRAM1	6.91453	5.58778	6.12809	5.29801	5.16336	3.65148	5.42577	5.21453	5.49277	5.04524	4.44799	5.42784
8154305	---	11.8606	11.6487	11.7307	11.3126	11.2586	9.1241	11.2739	11.3714	11.1852	11.3214	11.1908	11.3957
8107330	APC	5.98572	6.23753	6.43244	6.68975	6.82553	4.83521	6.0252	5.40699	5.55611	6.89858	6.81716	6.96511
8130464	TMEM242	4.44323	4.29854	4.20575	3.53476	3.68222	4.19739	6.33759	5.91205	6.05042	3.76587	3.12636	3.81949
8142096	ATXN7L1	8.53781	8.50272	8.54284	7.65712	7.7172	5.42116	8.75094	8.10642	8.84546	7.85721	7.71363	7.93832
8069633	ATP5J	5.86891	5.71581	5.47594	5.49811	5.35243	4.78381	6.09097	6.2237	6.00246	5.16024	5.18629	5.22112
7906576	NCSTN	9.46307	9.26738	9.59832	8.89372	8.48933	5.31886	9.16359	9.07602	8.90336	8.67515	8.80322	9.03385
7950067	DHCR7	7.24962	5.36605	6.79122	4.59934	4.2739	3.55003	4.19549	3.63088	4.45401	5.18568	4.90126	4.03195
8050367	NBAS	4.60992	3.97041	4.1511	3.67269	3.6789	3.83614	5.85797	5.88777	5.76164	3.59588	3.72646	3.59456
8051814	ZFP36L2	5.7026	5.18157	5.44872	5.96989	5.95008	4.60369	5.58175	5.67458	5.79861	6.37561	5.91351	5.97113
7927548	---	4.1598	4.02656	4.37589	5.47772	5.69147	4.31554	4.18128	4.10517	4.37396	5.04977	5.50244	4.53511
8125483	TAP2	6.73937	7.72299	7.46713	8.24643	8.86088	6.62837	7.1267	7.70892	7.44675	8.09734	8.77401	8.36051
7901915	ALG6	5.04945	4.82499	5.20693	4.14865	4.83955	4.0596	4.89774	4.78325	4.9187	4.15036	4.139	4.5554
7953516	RPL13P5	5.04356	5.06943	4.80008	4.13471	4.62013	3.61435	5.0512	4.66995	5.3396	3.99024	4.48455	3.98637
7951372	CASP4	10.1941	10.6394	10.5685	10.6311	10.4037	6.29913	9.62167	9.84648	9.49258	10.9188	11.1326	11.1691
8121489	AMD1	5.33807	5.85526	6.35088	7.38186	7.07628	5.38231	6.54478	6.57056	6.4884	6.47086	6.7786	7.01066
8045182	PTPN18	7.43264	7.09616	6.96824	6.76189	6.52612	3.89167	7.93947	7.67103	7.03503	5.68051	6.17995	6.55189
7928401	CHCHD1	6.46715	5.68009	5.99809	5.18577	5.10313	4.46281	6.12292	6.42559	6.59034	4.80286	5.20379	5.49146
8076511	---	10.7299	11.4914	10.2675	10.4244	10.3001	9.08417	13.1804	13.1172	13.2717	9.64992	9.42166	10.1691
7901038	RPS8	8.65803	8.98126	7.97898	7.91511	7.63682	5.24936	10.7753	10.8637	10.8536	7.18411	7.25202	8.0288
8129937	CITED2	7.94097	7.58347	7.53009	7.30466	7.13426	6.96813	7.80096	7.7657	7.75922	7.11263	7.20709	7.22772
8088092	RFT1	5.30511	6.26671	6.04653	5.18788	5.29366	4.89039	6.1382	5.61436	5.64715	4.56665	4.84724	5.2118
8135532	LSMEM1	4.65089	5.08131	5.46597	5.84279	5.77028	5.41599	4.29454	4.15292	3.73175	5.68108	5.96274	6.0535
7929750	ENTPD7	7.62981	5.04261	5.47076	4.28844	4.70975	4.98527	4.29577	4.13921	4.16622	3.91335	4.05764	4.19398
8130988	TMEM242	4.32971	4.02328	3.96459	3.30958	3.49476	3.99587	5.90546	5.61671	5.65373	3.4989	2.96597	3.66844
8146243	HOOK3	6.93646	6.37807	6.31309	6.09663	6.39489	4.70356	7.19086	7.07085	6.99187	5.57343	5.5679	6.12592
8098121	RAPGEF2	6.78128	7.12951	6.98836	8.00939	8.59711	4.9419	6.22085	6.73501	6.32935	7.49542	7.77145	7.98412
8113790	MARCH3	5.11871	5.01548	5.85807	4.65787	4.17772	4.38925	4.13994	4.18668	4.55882	4.40938	4.55012	4.41304
8062206	ROMO1	8.70984	8.07779	7.75111	7.35537	7.24823	6.42394	8.41623	8.25961	8.48708	7.48134	7.27205	7.38322
8027390	POP4	5.56372	5.36733	5.63854	5.06063	5.36107	4.28177	6.21191	5.86369	5.94602	4.91949	4.55893	5.11904
7951008	TAF1D	5.90374	6.71604	6.48608	6.89084	7.07409	5.70868	6.72835	6.9358	6.91448	7.09037	7.00069	7.19428
8161988	UBQLN1	8.81429	8.16202	8.2311	7.95093	8.13452	5.72089	8.5743	8.5957	8.76419	7.74254	7.64283	7.8433
8126646	MRPS18A	6.85942	6.94612	6.83507	6.16699	6.57469	4.25238	7.98133	7.91163	7.8366	6.14812	6.50035	6.37577
8087380	USP4	9.03273	9.17142	9.34647	9.8927	9.72292	6.41788	8.595	8.50363	8.34341	9.68394	9.61889	10.2176
8043036	DHFR	4.73866	6.42752	5.52717	3.71461	3.76306	4.43615	3.3027	2.63023	4.6042	4.25335	2.61394	3.31117
8135497	ZNF277	5.34337	5.21449	4.97679	4.83699	4.93822	4.80592	6.64921	6.69512	6.80305	4.55616	4.5435	4.85821
7897068	SKI	6.91257	7.08005	6.99215	7.35664	7.5748	5.94851	6.35032	6.56314	6.62735	7.39122	7.4515	7.55558
8011462	NCBP3	7.65411	7.11721	7.20597	6.70856	6.85442	4.4378	7.04859	6.65741	6.70985	6.6315	6.36096	6.85666
8083119	RNF7	6.88269	6.16444	6.07716	5.84576	5.71487	4.7207	7.11587	7.04788	7.14196	5.70751	5.70484	5.50105
8124994	C6orf47	6.11687	6.07696	6.10548	6.27146	6.27189	5.55586	5.86882	5.98678	5.93331	6.47246	6.41607	6.58923
7942289	RNF121	5.24114	5.57952	5.3304	5.44592	5.54953	5.01922	6.42522	6.11525	6.1483	4.77822	5.01304	4.73736
8020267	CEP192	6.2585	6.75868	6.59552	5.74918	6.20619	5.19555	6.79029	6.65268	7.04878	5.98144	5.57399	5.8962
8018803	SRSF2	7.77435	8.37644	7.50637	9.15674	9.00136	6.18065	7.41738	7.58937	7.81202	8.61282	8.88024	8.57644
8006183	SUZ12P1	6.2351	6.92641	6.25962	7.32336	7.16293	4.10839	6.26178	6.67165	6.7286	7.57794	7.23183	7.08542
8001818	TK2	6.35297	6.11629	6.53845	5.73904	5.23395	5.55674	6.04147	5.80772	5.864	5.6159	5.6374	5.85754
7950086	NUMA1	6.15855	5.76644	6.07611	5.27561	5.25574	4.52011	6.14972	6.25321	6.49806	5.20908	5.45742	5.58104
7954132	C12orf60	3.439	3.26334	3.20725	3.78478	4.00208	3.39974	3.45537	3.61698	3.87319	3.7932	3.94935	3.76697
7995755	OGFOD1	5.05509	5.27682	4.83474	4.98909	4.68198	4.12596	6.19453	5.64787	6.15248	4.30286	4.29754	4.50668
7913256	DDOST	7.38673	6.94223	6.51021	6.19632	6.39602	5.42269	8.21667	8.37137	8.2778	5.78502	5.98186	6.46395
7965606	HAL	8.10329	8.79827	9.55257	9.7595	9.8931	7.35506	7.1582	7.86923	7.75223	10.1737	9.96853	9.91606
8023914	PQLC1	8.02905	7.72918	7.8321	7.61939	7.45176	7.0767	7.72711	7.62097	7.96563	7.19612	7.42324	7.39404
8180391	---	5.93794	6.65152	6.29914	7.10231	6.89969	6.34047	6.20963	5.96629	6.26953	6.89319	7.16454	6.91531
8026548	AP1M1	8.5599	7.90449	8.29544	7.76866	7.63634	5.09636	7.9773	7.88534	8.16727	7.58158	7.29393	7.77512
7938396	AMPD3	7.23925	7.65554	7.26401	6.73752	6.12799	5.3104	5.96954	5.84276	6.21915	6.083	6.4471	6.92305
7939341	CD44	11.6742	10.6424	11.134	9.54299	9.98219	7.31635	11.3604	11.3068	11.125	9.7471	9.72269	10.6252
8005547	SNORD3B-1	8.02678	7.62273	8.54549	7.59979	7.22473	7.2217	10.2355	10.4136	10.2214	7.39001	7.281	7.05818
8005553	SNORD3B-1	8.02678	7.62273	8.54549	7.59979	7.22473	7.2217	10.2355	10.4136	10.2214	7.39001	7.281	7.05818
8013323	SNORD3B-1	8.02678	7.62273	8.54549	7.59979	7.22473	7.2217	10.2355	10.4136	10.2214	7.39001	7.281	7.05818
8013325	SNORD3B-1	8.02678	7.62273	8.54549	7.59979	7.22473	7.2217	10.2355	10.4136	10.2214	7.39001	7.281	7.05818
8013329	SNORD3B-1	8.02678	7.62273	8.54549	7.59979	7.22473	7.2217	10.2355	10.4136	10.2214	7.39001	7.281	7.05818
7965150	---	8.75637	8.33745	8.63278	8.24801	8.535	6.76441	7.01665	6.97283	7.00603	7.44718	8.24128	7.80319
8136869	CASP2	8.41689	7.53779	7.54319	6.74883	6.62568	5.56192	6.94259	7.26774	7.37591	6.70766	6.95653	7.14291
8169984	HPRT1	7.04922	5.69138	5.29872	4.1634	4.83509	3.68959	6.23159	5.70871	5.77045	4.37471	4.17008	4.89825
8055606	GTDC1	8.16889	7.6341	8.06036	7.76523	7.27904	4.31464	5.55706	5.49714	5.78329	7.34597	6.87861	7.36121
8136159	---	4.33751	3.10289	3.30013	4.31603	4.37231	3.94474	3.86183	4.84312	3.9412	4.95463	4.97239	4.6056
7971511	---	5.29478	6.0213	5.82164	7.57546	7.60751	5.79974	5.33384	3.96807	4.76843	6.45032	7.37684	7.32428
8091806	RPL23A	8.14373	8.65953	7.96858	8.1106	7.90614	6.40502	10.8583	10.6621	10.8412	7.49221	7.47678	7.76149
8083656	MFSD1	8.91776	7.9026	8.37648	7.51079	7.06138	3.90264	8.50479	8.77719	8.5061	7.69447	6.74811	7.45428
8151512	PAG1	9.25417	7.84149	8.94296	6.57707	6.09237	4.80261	6.39666	6.26532	6.85554	7.76546	7.1825	7.24115
8178298	GABBR1	5.61944	6.11279	6.76207	5.23456	4.98288	4.54003	7.62137	7.37791	7.45474	4.45908	5.18488	5.4421
7905598	SNAPIN	6.16267	5.41256	5.40765	4.34119	4.13994	5.86687	6.51324	6.56892	6.15808	4.81655	4.73423	5.03257
8086505	ZDHHC3	9.96422	9.14402	9.19943	8.30868	8.57738	5.77441	8.40975	8.5193	8.43188	8.58849	8.26973	8.87637
7952036	MPZL3	6.73915	6.90531	6.73665	7.48575	7.27736	5.15968	5.02827	5.45978	5.27263	7.08574	7.8925	7.70376
8000413	NSMCE1	7.29778	6.45281	6.713	5.37884	5.87939	4.82604	7.32589	7.4665	7.23734	5.63967	6.13086	6.08093
8166876	DDX3X	8.18711	8.40767	8.62666	9.18966	9.48421	6.34828	8.32733	8.55256	8.12864	8.85518	9.10696	9.12593
7900183	MANEAL	4.19516	3.88153	3.64972	4.20905	4.41474	4.77987	4.0597	4.30999	4.2537	4.57326	4.35642	4.57381
7914557	SYNC	3.07952	3.70988	3.68344	3.60669	3.66803	4.81689	3.53753	3.26865	3.57115	4.08254	4.39758	4.07652
7964234	ATP5B	9.19918	9.15399	8.93168	8.56493	8.41278	5.75917	10.3193	10.1342	10.3475	8.24668	8.33489	8.83187
7930894	GRK5	4.61364	5.57755	5.42877	6.638	6.59898	5.75075	5.55762	5.81689	6.08079	5.99678	6.0016	6.41207
7965510	TMCC3	6.53575	6.69129	7.28225	7.54122	7.79907	5.43879	5.03789	5.61578	5.45478	7.59677	7.53665	7.79086
8030362	SNORD33	7.4717	6.50945	7.55187	8.57057	8.64369	5.19279	7.65293	7.59404	7.56877	8.06984	8.52509	7.88434
8144685	---	5.85317	6.16041	6.15929	6.71722	6.55509	5.558	5.56703	5.51311	5.49682	6.48191	6.5613	6.4908
8058866	TNP1	3.28298	3.62699	3.24391	4.04066	3.69965	4.90548	3.60493	3.62325	3.69471	3.89176	3.87837	3.95104
7940662	ROM1	6.13381	5.13057	5.59626	5.33212	5.16621	5.07221	4.77144	4.71734	4.60405	4.72042	4.99831	4.6593
7909610	ATF3	4.15103	4.09708	4.09976	5.1402	5.09964	4.40071	7.14747	7.56085	7.46784	4.62261	4.5693	4.56628
7938291	SNORA3A	6.71413	7.44358	5.97493	7.77551	8.09768	6.27353	8.15972	7.38112	7.59345	7.59589	8.38972	8.16016
8173531	HDAC8	4.75127	4.92831	4.64946	4.5467	4.37157	4.47362	6.55962	6.38695	6.35642	4.45204	4.22951	3.94777
8107375	YTHDC2	6.14857	5.27666	5.43228	4.26309	4.24343	3.79261	6.20543	6.24938	6.05015	4.5218	4.70558	5.09953
8038515	VRK3	7.62892	7.98802	7.78163	8.06019	8.06182	6.4952	7.25228	7.31013	7.3758	8.25624	8.1617	8.38686
8073013	---	5.82235	5.77088	5.78442	6.00304	6.02505	6.25581	5.42562	5.75661	5.71766	6.76	6.44245	6.08177
8109610	---	2.68342	2.65426	2.77775	2.38878	2.44441	3.74782	2.58085	2.46438	2.55233	2.24021	2.16967	2.43466
8141050	RPS3A	9.69133	9.6233	9.33495	9.26633	9.21415	7.27738	11.1603	11.0782	10.4581	8.86693	8.49113	8.98464
8128111	UBE2J1	10.4901	10.0104	9.87071	9.39548	8.49187	6.65009	9.0737	8.7257	8.58803	8.94021	9.19563	9.37931
7980970	ITPK1	6.13883	7.40871	7.59632	7.90916	8.21166	6.00069	6.54347	6.67819	6.94082	8.6109	8.09055	8.17863
7905986	FDPS	6.28028	6.38286	6.1228	5.6837	5.48157	5.17674	6.42083	6.4169	6.40126	5.88999	5.3401	5.80456
8100615	UBA6	6.63868	6.22085	6.0531	5.82796	5.61795	4.66442	6.42795	6.35105	6.56875	5.72727	5.5316	5.81154
8178988	ZBTB22	5.64981	5.83285	5.9391	5.72262	5.87514	5.96516	5.58003	5.40945	5.39425	6.21138	6.30828	6.25249
8047865	PIKFYVE	6.74154	6.47699	6.68377	6.21122	6.21194	4.94382	6.32007	6.04309	6.22963	5.91064	6.19267	6.25822
8044963	---	6.98097	6.62458	6.49085	7.57846	7.57162	4.07472	7.11305	7.00987	6.89407	7.19838	7.6785	7.16586
8122705	PCMT1	10.1839	8.99602	9.86128	8.33395	8.41465	5.47796	8.69982	9.25383	9.05339	8.42441	8.45657	8.95932
8067121	SUMO1P1	6.8504	7.81086	7.27355	8.9551	8.37498	5.81083	5.70277	5.40403	5.1032	8.11574	8.34582	8.32938
8035855	ZNF681	2.19208	2.13718	2.09672	2.39939	2.37649	3.38735	2.51194	2.468	2.57701	2.52842	2.44546	2.62802
8128429	CCNC	6.03147	4.69289	5.4674	4.37305	3.57502	4.47741	6.29025	6.41451	6.69487	4.26013	4.08739	4.34102
8113073	ARRDC3	7.80981	8.38875	8.98635	9.31543	9.59563	4.78672	7.34807	8.26097	7.38727	9.36966	9.66932	9.61596
8072304	HORMAD2	3.1549	3.24378	3.44628	2.77858	2.80846	4.6491	2.59727	2.71222	2.77248	2.9509	2.66324	2.81691
8084128	TTC14	6.23711	5.66309	5.57569	5.05422	4.67296	4.25254	5.92851	6.05835	6.14605	5.21434	5.09339	5.13083
7959164	DYNLL1	6.88312	6.42075	6.72861	6.088	5.64364	5.55873	8.1752	7.74251	8.16529	6.09326	5.6863	6.07108
7973371	C14orf119	7.81415	7.38562	7.88828	6.97146	6.71683	4.45178	7.32972	7.13536	7.2776	6.49325	6.8516	7.33936
7995096	ITGAM	10.1889	9.33458	10.2795	8.7407	8.77005	5.77154	8.67583	8.40676	8.44085	8.91056	9.11858	9.23597
7955896	COPZ1	7.22173	6.58958	6.15074	5.64809	5.53224	4.33519	7.91036	8.08893	8.1318	5.89166	5.23266	5.89963
8048595	GMPPA	6.5644	6.19422	6.19698	5.96944	6.16192	4.88714	7.66906	7.72574	7.62026	5.92112	5.82352	5.68998
8021645	SERPINB10	5.15378	7.76931	7.21689	4.55935	4.10965	5.77365	4.31131	5.54153	5.95633	4.34196	4.01514	4.84095
8113616	FEM1C	7.27365	6.86322	7.34944	6.95583	6.67152	5.51397	6.64746	6.66159	6.69438	6.13716	6.5269	6.76086
8014925	MED24	5.60858	4.97676	5.1053	4.65404	4.82629	5.79175	6.59263	6.02594	6.4694	4.17356	4.47233	4.67535
7906061	SYT11	6.92426	4.99943	5.38072	3.76338	4.19159	4.2932	5.39588	5.69659	5.70653	4.27069	4.26561	4.34755
8016508	SNF8	8.2513	8.21663	8.03861	8.0197	7.83227	5.46471	8.6184	8.98596	9.11485	7.52975	7.57654	7.73271
7950016	ORAOV1	4.7131	4.96657	5.01145	4.28276	4.71708	4.79171	4.97437	5.28055	5.12651	4.25887	4.43487	4.30449
8112458	AK6	5.61569	5.14775	4.68541	4.52668	4.88918	4.3514	6.5736	6.71687	6.46449	4.38944	4.36088	4.35208
8165686	ND5	10.228	9.36247	8.80888	8.59585	8.24005	6.83386	10.849	10.9667	10.9291	7.78798	7.8341	8.81788
8039961	ACP1	6.23903	5.81229	4.88847	4.5822	4.82474	5.08962	7.70315	7.67197	8.04332	4.48114	4.7297	4.5378
7924760	ITPKB	4.772	4.94319	5.07176	5.46701	5.42892	4.54709	4.75307	4.58338	4.83772	5.25804	5.48427	5.48527
7917503	GBP3	4.35857	4.99664	4.73124	4.55785	4.8612	4.75797	5.22072	5.40658	5.36558	5.31407	5.73814	5.19867
8005943	RPL23A	8.23595	8.66058	7.88136	8.15013	7.96368	6.39214	10.8681	10.6406	10.8081	7.573	7.43344	7.69848
8087100	UQCRC1	7.19264	6.50069	7.18806	6.33932	6.0705	5.09081	7.78319	8.04996	7.98074	5.97321	5.65184	6.51885
8050176	ITGB1BP1	7.14051	6.39366	6.50001	5.73859	5.69926	5.83401	7.6788	7.60568	7.70085	5.29441	5.50531	6.30941
8140556	HGF	6.40835	3.77186	6.03644	3.54609	3.2748	3.94803	4.36419	4.59077	4.37145	3.4954	3.38074	3.41586
8102817	ELF2	6.73858	7.64084	7.63942	8.06582	8.06787	4.83102	6.47535	6.39508	6.65281	8.08763	8.08728	8.32947
8104944	NIPBL	7.91349	7.77236	8.31616	8.46553	8.59102	5.79324	7.65163	7.84695	7.54875	8.48278	8.57851	8.6891
8123802	TXNDC5	6.28478	6.27028	6.64753	5.5419	5.82202	4.37742	7.70624	7.38444	7.40428	5.70742	5.64539	6.01311
8072488	DRG1	6.61003	6.53313	5.98537	5.31676	5.89163	5.35607	7.41254	7.69162	7.42875	5.36141	5.45067	5.86892
8056943	KIAA1715	8.27548	6.41749	7.19206	5.37335	5.07802	3.32861	5.21529	5.8108	5.6464	5.21537	4.62836	6.44424
7955019	ARID2	6.84313	6.65788	7.12703	6.57866	6.26637	4.60868	6.55713	6.75238	6.4809	6.15555	6.19046	6.4741
8129627	VNN3	7.34601	8.1389	8.84262	9.23173	9.82002	6.81896	5.73007	6.3813	5.4333	9.76786	9.16095	9.52975
8112007	EMB	8.59509	7.69986	8.95901	6.9488	6.88213	6.14886	7.25891	7.33301	6.93344	7.27348	7.35972	7.59141
8043932	RPL31	7.26494	7.39389	6.97426	6.76779	6.75073	5.81318	9.76265	9.25309	9.3357	6.53391	5.92142	6.72853
8027996	PSENEN	8.75822	8.84619	8.90628	9.14	8.96095	6.0007	8.34657	8.53956	8.31195	9.10417	9.4649	9.45255
8126358	---	3.23739	2.85611	3.27902	2.93365	2.80151	2.82405	2.62955	2.82002	2.78556	2.52006	2.46098	2.75942
7965471	UBE2N	6.76478	6.16357	5.74559	5.64779	5.88326	3.89167	6.86026	7.01335	6.97456	5.48244	5.27072	5.47738
8037742	PGLYRP1	8.87889	9.44875	9.6575	7.82309	7.94076	7.07695	5.3266	4.77955	5.66112	8.04495	8.10347	8.74863
7970287	LAMP1	9.09552	8.95788	8.91098	8.53415	8.60944	7.50465	8.652	8.61938	8.79583	8.43663	8.46847	8.71157
8111533	LMBRD2	4.06655	3.69001	4.01609	3.19445	3.57999	3.49925	4.2835	3.81788	3.66366	3.34855	3.21675	3.13468
7904465	HIST2H2BA	8.51847	9.52853	8.96395	9.8301	9.80906	7.16954	8.30047	8.86496	8.25164	9.84486	9.90372	9.95086
8165690	CYTB	10.3785	9.64898	9.79678	9.07828	8.56154	7.44004	10.6442	10.9228	11.0408	8.74226	8.61517	9.48533
8084742	LPP	7.42287	7.69561	7.58636	8.11521	7.95775	6.35127	7.55565	7.47035	7.75838	7.84843	8.25215	8.43736
8008885	MIR21	6.38286	8.60366	7.58589	8.8765	8.42544	4.09159	8.69327	8.88001	8.87391	9.00321	9.02398	9.29939
8115957	HK3	8.98768	7.38643	9.00266	6.33482	6.02503	5.56562	6.94507	6.76431	7.03572	6.54898	6.65844	7.58375
7930454	PDCD4	5.2554	6.54831	5.90018	7.05915	7.08637	4.40158	6.42499	6.7754	6.63554	6.77121	6.94036	6.91285
8154333	KDM4C	6.06581	4.89664	5.33756	4.34961	4.79897	3.96382	6.3045	6.13523	5.84553	4.59807	4.37079	4.37846
8152133	RRM2B	5.94344	6.00186	5.99479	6.80614	6.49313	4.66146	5.63663	5.52876	5.6405	6.45293	6.4244	7.15668
7938485	MICAL2	5.72625	7.44907	6.59915	8.12461	7.90917	5.73418	7.65033	7.40199	7.69713	7.91074	7.54934	8.64763
8124531	HIST1H3I	7.49662	8.46277	7.01597	6.13942	5.44548	4.55767	7.38286	8.33043	8.12633	6.03643	5.71753	6.72886
8097813	ARFIP1	5.14688	7.21323	6.73755	7.74784	7.76887	3.23263	6.821	6.75084	6.83171	7.77018	7.98688	7.84361
8040908	SNX17	7.31405	6.83391	6.73106	6.10611	5.98533	6.17659	8.0688	7.35188	7.91401	5.86009	5.7887	6.49443
8049657	ASB1	6.47783	5.00502	6.69139	4.59656	4.59273	4.93116	5.87482	5.68063	5.82297	4.80789	4.53099	4.89878
8142912	TMEM209	4.86032	4.93452	4.40761	4.18288	3.97648	4.58914	5.36652	5.88751	5.82595	3.98023	3.88152	4.23208
7981494	AKT1	7.70076	8.70291	8.05362	9.2817	9.43594	5.9755	8.46597	8.45682	8.75835	8.78191	9.09248	9.12014
7902883	LRRC8D	5.92359	6.30225	6.46692	5.91411	5.82907	5.90134	8.11693	7.73375	8.10047	5.64565	5.55277	5.69271
7897561	KIF1B	9.0419	7.86001	9.07567	7.22723	7.30902	5.93438	6.23978	6.36865	6.11931	7.70478	7.34422	7.76893
8011832	NUP88	4.94199	4.92677	3.85461	4.32515	4.28916	3.40301	7.00729	6.45562	6.77791	3.45781	3.56522	3.71916
7905185	RPRD2	7.07025	6.76607	7.23408	6.92271	6.53561	5.85141	7.50038	7.28922	7.20682	6.01173	6.37412	6.59208
7934459	NDST2	8.42961	7.22014	7.39749	6.78826	7.01085	5.60525	6.81022	6.99291	7.07239	6.56249	6.58809	6.89422
8169412	ALG13	4.83063	4.86076	4.49678	4.1528	4.09194	4.4223	6.15027	6.08708	6.00002	3.44884	3.99746	4.3955
7913705	CNR2	3.95936	3.98897	3.98185	4.65383	4.23798	4.38983	4.03787	3.67132	3.98139	4.43082	4.70624	4.46653
8027205	NDUFA13	9.14258	8.80667	8.23364	7.96004	7.68482	5.96611	9.9223	9.90029	9.95939	8.02702	7.75378	8.09158
8005471	RPS28	9.50795	9.56058	8.77178	8.82809	8.81005	7.40344	11.3782	11.3786	11.4498	8.42386	8.51919	8.73571
8057700	ORMDL1	6.83131	6.53789	6.46345	6.03787	5.68339	4.32855	7.64484	7.74742	7.87773	5.40846	5.69748	6.30986
8122933	TIAM2	4.14844	5.06286	4.8528	4.80113	4.39989	4.84757	3.88155	3.64637	3.59557	5.18254	6.20105	5.86268
8101210	---	5.28557	5.05929	5.74823	5.02602	4.82695	4.41326	4.08439	4.20491	4.13995	4.68007	4.90691	4.54693
8112803	LHFPL2	4.7185	5.20301	4.44627	5.08943	5.43461	4.83111	5.89309	5.46765	5.66218	5.83676	5.84083	5.24743
8086467	ANO10	7.2721	6.37133	6.68714	6.05946	6.14787	4.6836	5.38678	5.44872	5.32978	5.82832	5.42652	6.30738
8130211	SYNE1	7.864	5.7582	8.39822	4.94169	5.05011	4.27183	4.11586	4.47455	4.06443	5.30228	5.49864	5.4465
8027604	KIAA0355	4.71769	5.15383	5.3819	6.03685	6.35926	4.35975	5.7037	5.39711	5.4065	5.70202	5.66591	5.91908
8145660	DCTN6	5.78524	5.34778	5.55369	4.78413	5.47758	4.29403	5.75363	6.41372	6.05208	4.8829	4.65752	4.74815
8048835	MFF	8.79882	7.39396	8.30517	7.06729	6.94751	5.24149	7.5735	7.76724	7.50462	7.27947	6.8225	7.15921
7990436	COX5A	6.8178	7.06996	6.4118	6.04814	6.18724	5.34027	7.98388	7.73187	8.32371	5.73672	5.18264	6.31034
8066598	ACOT8	7.22961	6.56192	7.22031	6.29857	6.16003	5.34406	6.53071	6.19404	6.67845	6.19227	6.28836	6.37782
8168447	PBDC1	5.98588	5.47498	5.36899	4.4542	4.54809	4.53616	6.16552	6.38072	5.3529	3.83725	4.94088	4.51848
8126474	MEA1	8.01421	7.77722	7.5665	7.31341	7.42663	8.42297	7.75082	7.79066	7.70928	7.46152	7.10444	7.20389
7918223	HENMT1	7.25124	5.91972	6.81949	5.44321	5.78076	5.47028	6.19055	6.21975	5.78597	5.55371	5.45523	5.77802
8033564	NDUFA7	5.90274	5.52787	5.55274	5.04489	5.29924	5.0203	5.77498	5.82135	6.1583	4.71709	5.23335	5.06798
8075481	---	9.09502	10.2726	8.73873	11.5088	11.5583	10.6748	7.64271	8.44026	7.33141	10.669	11.0452	10.5776
8124160	---	4.595	3.06215	3.60672	2.45234	2.37798	3.14042	2.51493	2.1289	2.73759	2.58324	2.5689	2.61509
8019877	SMCHD1	8.67	9.46171	9.48264	10.1793	10.1225	8.64973	7.31974	7.8832	7.19634	9.95371	10.2965	10.039
8145603	PNOC	4.34804	4.428	4.54115	4.98908	5.03177	4.73107	4.92245	4.77033	4.69095	5.0356	4.82982	4.78149
8098714	FRG1	5.97687	5.88804	5.41896	5.46473	5.71217	5.20122	6.30665	6.29669	6.45499	5.03213	5.19968	5.27855
8170630	---	5.54142	5.19943	4.79503	6.44344	6.43797	4.87904	4.97223	5.49833	5.68727	6.72493	6.05567	5.78665
8179595	GABBR1	5.87144	6.37404	7.10908	5.54317	5.25574	4.63364	7.92754	7.78099	7.77361	4.6664	5.46356	5.70712
8007414	AOC2	5.40533	6.81937	6.91603	7.61717	8.34526	6.97154	5.65884	5.31474	5.05189	7.59781	8.10217	7.60022
8147424	NDUFAF6	4.27265	4.46727	4.4733	3.62577	3.80632	4.39804	4.42994	4.64492	4.58649	4.09699	3.83787	3.43056
8035435	KIAA1683	5.74447	5.75511	6.02654	6.60695	7.07694	6.20647	6.0005	6.15211	5.80788	6.62322	6.19522	6.77703
8047265	C2orf47	5.44016	3.66828	5.42166	3.71696	3.48034	3.66893	4.90565	5.21247	5.37427	3.63527	3.25067	3.24496
8119529	UBR2	8.64091	9.2866	9.59183	10.2082	9.87974	6.85202	8.03446	8.08862	8.08418	9.74949	10.0717	10.1323
7947221	LIN7C	7.21162	6.40178	6.32023	6.11083	6.13238	5.66511	7.54289	7.34243	7.59537	5.79446	5.44475	6.08479
8066822	SULF2	4.65274	8.92135	7.02162	9.91379	10.1655	7.48213	9.57555	9.65674	9.84685	9.31656	9.85301	10.1713
7921738	USF1	7.3471	7.749	7.82093	8.22513	7.94609	6.36529	7.83909	7.85889	7.74133	8.03203	8.29494	8.26783
8160803	---	3.66749	3.4392	3.47753	3.95937	4.27807	4.4148	3.58717	3.59841	3.18473	4.55416	4.26425	3.87254
8161415	ANKRD20A8P	2.21868	2.3549	2.35865	2.62817	2.43991	4.11001	1.86864	2.44155	2.12366	2.93741	2.72971	2.96342
8153903	RPL8	9.02697	9.23672	8.3826	8.48242	8.57236	6.31945	10.733	10.6424	10.8042	8.20093	7.89085	8.30428
8025429	HNRNPM	7.28179	7.43212	6.99306	7.08116	7.0506	5.82008	7.54209	7.63148	7.562	6.72651	6.47736	6.89214
8055445	DARS	6.49337	6.99101	6.20033	5.33393	5.83545	5.27187	7.30425	7.28671	7.27544	5.27882	5.79823	6.00403
8148642	GSDMD	6.23834	6.18687	6.57191	6.43204	6.40547	4.77866	5.7523	6.08948	5.95215	6.66187	7.04457	6.99676
8031837	ZNF587	6.00603	5.86622	6.39084	6.84195	7.45202	7.14506	5.37078	5.01523	5.07478	6.90667	7.31885	6.57608
8126574	YIPF3	8.63035	8.75307	8.80504	9.2229	9.19238	6.36996	7.98743	8.0038	7.88267	9.01132	9.14604	9.321
7929768	CUTC	8.4821	7.95592	8.76508	7.51472	6.79464	6.35843	7.27648	7.0422	7.26622	7.44294	7.73703	7.48972
8129706	HBS1L	6.56393	5.87303	5.98866	5.57811	5.35779	4.8312	6.86087	6.72831	6.74604	5.32387	5.23137	5.72814
7976292	RIN3	8.39078	7.84198	8.62386	7.41733	7.40116	6.61516	7.26279	7.36052	7.61226	7.62843	7.65442	7.52826
7929012	STAMBPL1	3.933	4.29895	3.94448	3.71185	3.5504	3.73243	3.28054	3.19268	3.12904	3.36899	3.33993	3.7731
8156452	FAM120A	7.46622	7.32633	7.57356	7.81965	8.09815	6.08144	7.6363	7.81191	7.96366	7.94726	7.94642	7.90633
8059361	WDFY1	6.42959	6.22567	6.70505	6.43353	6.9306	4.88787	6.83704	7.32821	6.913	7.32449	7.63694	6.89268
7951140	LOC100131541	4.18976	6.57047	6.03316	7.86763	8.21988	5.78662	6.55827	6.71588	6.56443	7.02147	7.73232	7.32845
8138939	---	5.23188	5.63379	5.34356	6.66023	6.17469	6.37479	5.11085	5.15953	5.46154	6.03235	6.19876	5.88244
8117106	RNF144B	8.86444	8.30867	9.14235	8.45127	8.16162	5.75483	7.62473	7.53627	7.97115	8.05057	8.03596	7.97937
7912155	---	4.29443	4.25231	3.89746	4.37643	4.71923	3.684	4.7176	3.65496	4.17032	5.0959	5.22549	4.82785
7953943	GABARAPL1	8.1969	8.68157	8.27479	8.85374	9.1662	6.65181	7.48697	7.52393	7.28745	9.05227	8.82364	9.00826
7924553	---	5.67284	5.65339	5.5059	5.3162	5.12234	4.4148	6.01793	5.91871	5.97188	5.20097	5.23757	5.20997
8007302	TUBG1	6.00061	5.6484	5.65442	5.35835	4.82521	4.78188	6.40948	6.02144	6.20803	5.26327	4.70423	5.15469
8025395	RPS28	9.50804	9.53351	8.83917	9.04147	8.98241	7.57909	11.1202	11.1591	11.0287	8.53087	8.58546	8.79687
8037794	PRKD2	6.96223	7.88532	7.69953	8.07525	8.34375	6.35299	5.82294	6.30005	5.9374	8.12215	8.50909	8.529
8148978	ERICH1	5.50875	5.13719	5.60427	5.41311	4.99475	4.00892	6.03044	5.12583	4.53436	4.08726	4.51344	4.13785
7975989	SLIRP	8.76569	8.94376	8.57867	8.18994	7.30439	4.72786	10.164	10.0128	10.1681	7.63596	7.37036	8.34101
7960716	PHB2	7.75904	7.552	7.42227	7.09369	6.79963	6.83913	9.01111	8.92198	8.97662	6.78049	6.80481	7.32193
8109732	MAT2B	6.10767	6.29389	6.22591	6.388	6.61949	5.09006	5.79857	6.17268	6.04534	6.58992	6.89807	6.67863
8159992	ERMP1	4.86823	4.65232	4.61348	4.27066	4.18287	5.00648	4.78896	4.70129	4.83225	4.25635	4.41078	4.15365
7899957	ZMYM4	6.47836	5.81673	6.21446	4.87984	4.95941	4.58803	8.02486	7.83782	7.76122	5.77648	5.29533	5.42285
8105989	LOC441081	10.5026	8.53534	10.3591	7.28361	7.00951	6.70171	8.68534	8.30292	8.96288	7.65697	8.3887	8.40446
7900087	ADPRHL2	5.45898	5.91962	5.52529	6.30184	6.58903	5.02842	5.79149	6.16016	6.20865	6.04911	6.60204	6.33505
8080438	SPCS1	7.09112	6.46213	6.56161	6.29281	6.23951	4.86041	7.26274	7.24294	6.97573	6.04014	5.96951	6.22826
8088915	---	2.73301	2.54004	1.66506	3.1147	2.77245	3.66296	3.24402	2.94502	2.86422	4.12025	3.05535	3.24467
7955361	LARP4	5.65278	5.00795	5.06448	4.74536	3.88559	2.7064	6.1181	6.48738	6.59038	3.86403	4.22861	4.62221
7990987	AP3B2	6.44808	4.69539	7.48896	4.41429	4.27639	4.21311	4.30769	4.00364	4.15645	4.20517	4.30699	4.42492
8020411	SNRPD1	3.61151	4.31161	3.91941	3.49783	3.44768	3.78707	5.16167	5.31163	4.80673	3.11544	3.27336	3.38204
7920238	S100A12	12.993	11.9796	12.6234	10.9841	11.3783	10.4407	10.9415	10.8396	11.2147	11.7604	11.2387	11.8013
7992145	SSTR5	4.20824	4.6764	4.25938	4.94963	4.7688	4.92199	4.2856	4.47646	4.45717	5.09409	4.96535	4.76187
7951660	RPL37AP8	4.94682	4.6878	3.98672	4.29722	3.81573	3.29139	5.60654	5.90808	6.14935	3.84391	3.41072	3.60589
8005512	PRPSAP2	6.48487	6.01736	5.96666	5.0328	5.61953	4.89835	6.53223	6.69831	6.8925	5.47487	4.92737	5.59598
8123598	SERPINB1	11.2888	10.498	11.0025	9.6963	9.70227	6.26454	9.56257	9.54229	9.54856	10.0969	10.2864	10.4201
8180345	---	8.9147	8.53097	8.1603	8.18779	8.37777	6.27341	9.71086	9.86837	9.79584	7.92728	7.68409	8.01059
8134880	MOSPD3	8.3241	6.9194	7.56753	6.53731	6.05097	6.23028	6.49075	6.39505	6.75033	6.52698	6.46062	6.62798
8173513	RPS4X	8.67379	8.86496	8.13675	8.09949	8.20904	7.2088	11.0994	11.1705	11.0745	7.4059	7.41437	8.23758
8105935	LOC101929738	10.2294	8.25684	10.0859	7.02452	6.76535	6.50372	8.38641	8.03211	8.69206	7.38375	8.11547	8.13365
8136388	TMEM140	6.54975	8.15222	8.61339	8.92541	9.27892	5.78175	5.26724	6.06519	5.33582	9.26105	9.87416	9.16435
8077123	CPT1B	6.67496	6.90697	6.95046	6.7814	7.10659	5.57608	6.63624	6.35794	6.57741	7.29781	7.28838	7.45479
8133549	GTF2IRD2B	5.51006	5.24829	5.87741	5.1181	5.17058	4.86311	5.45302	5.12229	5.54428	5.05388	4.77268	4.89272
7949619	SLC29A2	4.90745	5.06513	4.95849	5.30675	5.29811	5.36237	4.9672	4.76346	4.94684	5.61379	5.35664	5.2988
8065325	RPS15AP1	7.8782	6.89657	6.9027	6.30519	6.7705	4.60759	8.93927	8.93158	8.76905	6.39948	5.67185	6.46157
8041122	PPP1CB	8.39922	8.053	7.73381	7.62766	7.45611	6.04214	7.57088	7.76422	7.45484	7.57461	7.21155	7.45633
8045846	---	6.84605	7.29557	7.00081	8.27182	8.11093	6.79485	6.55697	6.18673	6.97268	7.92055	7.55831	7.88898
8052861	SNRPG	5.0519	5.48761	4.71916	5.53606	5.46936	5.56913	5.16321	5.19794	5.18796	5.52296	5.95456	5.80619
8174509	GNG5P2	10.0959	9.99337	9.881	9.41511	9.41194	8.08268	9.23178	9.33589	9.27825	9.39122	9.72272	9.5503
7946579	LYVE1	4.46898	5.24352	5.01825	5.3562	5.46531	4.72334	4.54881	3.67515	3.87489	5.67788	5.85669	6.96716
7974047	SSTR1	3.18101	3.25686	3.39993	3.89826	3.78161	4.47393	3.446	3.43819	3.36898	3.60152	3.80554	3.6573
7920875	SCARNA4	6.77367	6.22935	6.61082	6.82756	7.64677	8.93146	6.45142	5.85209	6.32875	7.44615	7.95026	7.17319
8077116	ODF3B	4.85755	6.53393	5.83222	6.39955	6.7899	5.38936	5.87747	6.43889	6.58251	6.69603	7.30949	7.27005
7973116	METTL17	4.62042	4.85433	4.62123	4.25488	4.05174	4.12706	5.8435	6.01358	6.08189	4.36275	4.18676	4.16382
7997010	CLEC18A	5.48782	5.82636	6.41587	6.0926	6.45381	4.95836	4.91647	4.58256	4.39296	6.73821	6.79345	6.66298
8121502	GTF3C6	6.22257	5.9555	5.45632	4.36294	5.19309	4.30213	7.71765	7.916	6.79621	4.39613	3.99465	5.15161
7984227	ANKDD1A	6.81572	8.52342	6.88999	6.38994	6.30176	5.2863	5.91891	5.91616	6.00527	6.13654	6.23419	5.87091
7953924	CLEC9A	3.6467	3.56017	3.38017	4.73683	5.60565	3.63734	3.22291	3.2121	3.39154	4.06397	4.29411	4.465
8110708	TPPP	4.71126	5.31619	5.10034	5.48273	5.41304	5.31576	5.00034	4.88309	5.31671	5.74425	5.58626	5.63683
8109438	LARP1	6.73351	7.03018	7.53812	6.1742	5.82456	6.20355	7.35568	7.39442	7.71801	5.93597	6.52469	6.3735
8124385	HIST1H4B	4.49201	5.34194	5.783	5.3601	7.07383	5.43193	4.6795	4.63512	5.14207	7.15588	6.49154	6.64827
8075263	NIPSNAP1	6.33	5.76655	6.03657	5.2759	5.22974	4.97178	5.48779	5.26089	5.90025	5.09119	5.46981	5.43803
8008922	PPM1D	4.66193	5.12657	5.42689	5.87691	6.09988	5.24384	5.64755	5.28534	5.36724	5.61628	5.81648	5.86189
8141625	EPHB4	5.02305	5.44056	6.20148	6.39579	6.79055	5.78608	5.22202	5.16038	5.16693	6.32648	6.85482	6.38135
8085026	RPL35A	9.56762	9.30377	8.91991	8.77948	8.69536	6.95588	11.0952	10.9773	10.8888	8.53333	8.05869	8.87277
8131414	ZDHHC4	6.15751	5.63095	5.60896	5.12598	5.39518	5.3324	6.71817	6.4144	6.94787	5.00715	5.28883	5.03793
8083223	C3orf58	7.02222	6.26769	6.82991	5.89819	5.30263	4.91775	7.47122	7.42385	7.56712	5.62767	5.2403	6.26626
8085374	RAF1	9.49751	10.0256	10.057	10.5803	10.6143	7.85781	8.89365	8.7664	8.45959	10.3271	10.536	10.6478
8132501	---	1.91962	2.99213	2.22085	3.81747	3.45615	3.83035	3.26587	3.44658	2.37729	3.50387	3.27659	3.97546
7998722	SNORD60	2.5155	2.31522	2.62222	2.65334	2.66662	2.2746	2.5576	2.64536	2.70005	3.04668	3.92152	2.92949
8021484	CDH20	3.40807	3.2944	3.30324	3.64334	3.53734	4.55835	3.21263	3.34082	3.14018	4.18622	3.58613	3.87241
8128522	HACE1	4.19219	3.99291	4.253	3.7199	3.67985	3.90298	4.19247	4.39121	4.39587	3.5892	3.71208	3.81602
7937913	---	7.3765	7.37803	7.22743	6.69075	7.12891	6.55275	6.60096	6.30572	6.60044	6.964	6.73638	6.42671
7977075	SNORA28	7.42516	7.50664	6.80516	8.26034	8.34463	3.33375	5.83019	6.3354	6.03608	7.69465	8.28788	8.155
8091648	SSR3	5.98781	4.49428	4.9151	4.40406	3.86987	4.2334	6.53309	6.3739	6.2448	3.91062	3.82448	4.19561
7896952	ATAD3A	5.32958	5.3093	5.30234	5.64491	5.59711	5.54617	5.42964	5.30534	5.55301	5.80507	5.89816	5.56237
8051573	CDC42EP3	10.062	10.167	10.1125	9.79586	9.58915	7.30511	9.27907	8.81522	9.07931	9.26885	9.40958	9.82887
8173162	---	5.47334	5.28664	5.80278	4.63146	4.21164	4.89732	5.38349	5.32745	5.02966	4.86651	4.998	4.8545
8073214	TNRC6B	7.93214	8.05474	8.05257	8.44745	8.63557	6.27787	7.12442	7.09226	7.3849	8.42095	8.41651	8.49908
8019857	NDC80	2.62224	3.58131	2.8749	3.78002	4.48648	3.48835	2.81629	2.77276	2.71857	3.7015	4.90034	4.01809
8128356	FBXL4	7.66946	6.0803	6.37817	5.72356	5.53677	3.63551	6.14786	5.8678	5.81124	5.37436	5.32607	5.77226
7942824	RPS28	9.60947	9.64831	8.96041	9.16492	9.11049	7.78984	11.2279	11.2578	11.1298	8.65367	8.71477	8.92713
8037037	ATP5SL	6.65764	6.43848	6.63941	6.17309	6.16784	6.09129	6.8175	6.51852	6.32577	6.07303	6.15315	5.99355
8150881	PLAG1	3.3238	3.08369	3.03982	2.70686	2.72897	3.3694	2.85405	3.04818	3.04894	2.74004	2.76064	2.66992
7953594	EMG1	4.47882	5.06418	4.6309	4.59168	4.34506	4.66131	6.36854	6.52643	6.32352	4.16543	3.80309	4.26971
8171865	---	7.47028	7.9026	7.1577	7.523	7.1878	5.4093	10.5128	10.4179	10.1447	6.56681	6.79756	6.97977
7942769	DKFZp434E1119	4.80824	6.29721	5.38433	7.69936	7.57034	6.0087	4.76374	5.14649	4.78009	6.71283	6.87697	6.30736
8028194	ZNF382	3.39318	3.29099	2.8569	2.63588	2.6457	3.77458	2.51593	3.25309	2.76967	2.47148	2.38371	2.56324
8074716	GGT1	7.54239	7.39716	7.33183	6.9655	7.30769	6.81599	6.66053	6.60891	6.57045	6.85898	6.63406	7.14299
7968270	ATP5EP2	8.0123	7.29049	7.67479	7.05333	7.19409	5.84035	7.66418	7.9655	7.61139	6.87387	7.05953	7.08539
8060539	PTPRA	6.34197	6.10444	6.35774	5.96995	6.06489	4.62618	6.21063	6.11245	6.07779	5.79587	5.88423	5.89859
8000028	DCUN1D3	5.61072	6.05344	5.92886	5.73331	5.77509	6.29616	5.74563	5.85077	5.75565	6.23172	6.45479	6.34657
8033069	NDUFA11	8.0648	7.41398	7.19521	6.66174	6.83694	5.54065	8.49548	8.56958	8.79009	6.85801	6.86965	6.79885
8176574	---	4.46347	4.47157	4.44886	4.13305	4.20192	4.14149	3.92838	4.05623	4.34634	3.97829	4.10885	3.92096
8042251	OTX1	5.09684	5.02523	5.15989	5.53106	5.57722	5.12813	4.77113	4.77715	4.91447	5.74986	5.43907	5.41408
8043630	ARID5A	7.51776	7.29494	7.27469	7.40917	7.6087	6.64101	6.72602	6.96878	7.16887	7.72689	8.09608	7.91143
8001185	DNAJA2	7.58553	7.07633	7.16403	6.72234	6.84835	4.66624	6.91837	6.59013	7.2798	6.8115	6.25427	6.48818
7984989	COMMD4	6.38065	6.02872	5.93597	5.31276	5.25574	4.59171	6.57484	6.76226	6.62889	5.63817	5.50084	5.72218
8062852	PKIG	4.06652	4.26382	3.97208	4.38059	4.48332	5.03301	4.11356	4.16656	4.29602	4.64527	4.63697	4.38644
8180392	---	9.73155	9.38006	9.47091	8.9457	8.82676	6.82647	10.2455	10.1182	9.74477	8.81789	8.65717	9.18481
7971692	INTS6	5.51281	5.26811	5.68214	6.29833	5.98843	5.43149	5.02019	4.86773	4.72756	6.03379	5.97548	5.99614
8031374	FCAR	10.7668	10.4047	10.391	10.0384	10.3717	7.84881	9.19989	9.18067	8.75147	9.61483	9.65164	10.1687
7983290	SERF2	7.49658	7.07611	6.90248	6.74418	6.71637	6.18397	7.2125	7.08483	7.08903	6.54087	6.67275	6.65245
7992402	NDUFB10	7.37494	7.04094	6.9053	6.59089	6.38054	5.67149	7.87565	7.7022	7.93562	6.46876	6.37461	6.7677
7911335	---	8.18408	8.4391	9.63012	9.54154	9.52196	10.6027	8.08172	7.86809	7.50232	10.0019	10.3592	9.57119
8165694	---	8.18408	8.4391	9.63012	9.54154	9.52196	10.6027	8.08172	7.86809	7.50232	10.0019	10.3592	9.57119
8013696	KIAA0100	6.44443	6.48313	6.55679	6.35133	6.54967	3.89863	7.16974	6.97352	7.15337	5.91884	6.08606	6.18425
7949496	CFL1	11.8347	11.3419	11.2373	10.9936	10.9455	9.02278	11.0515	11.0569	11.0768	10.8432	10.895	11.031
7997230	PSMD7	9.67968	9.19041	8.86421	8.65476	8.43295	6.79242	9.46806	9.51649	9.63942	8.40566	8.1668	8.82101
7919584	HIST2H2BA	6.24618	8.09986	6.74782	9.06248	8.76662	6.08921	5.22756	6.71178	5.8119	8.46237	8.73394	8.77843
7989493	RPS27L	5.30411	5.4025	4.75729	4.33752	4.38232	2.84265	5.9188	6.29416	6.05786	4.63173	4.27088	4.57583
7997099	SF3B3	5.21308	5.55053	5.20472	5.19155	4.96572	3.86927	7.48894	6.96401	7.21675	4.44009	4.92513	4.67759
8042107	---	6.64636	5.7148	5.70366	4.97807	5.46157	4.8388	8.02873	7.78111	7.8559	5.03626	4.91648	5.39093
8136849	GSTK1	7.92337	7.42546	7.31219	6.51055	6.14379	4.88266	8.0365	7.89902	7.82378	6.55885	6.99932	7.02762
8167772	---	3.80268	2.70573	2.76845	4.82702	4.47184	3.47996	3.52964	3.82316	3.15682	4.51818	4.56343	3.70112
7958352	BTBD11	3.47858	3.68045	3.55222	4.37661	4.38159	4.25682	4.36082	5.1143	4.8722	4.06868	4.17885	4.46701
8019622	TMEM106A	3.92736	5.43041	5.48448	6.26542	6.30523	5.79181	8.23915	8.35703	7.98153	6.04409	6.15339	6.30983
7926059	---	6.32213	6.45296	6.18773	5.77914	5.52206	5.68907	5.59031	4.88341	5.47234	5.63228	5.66976	5.73603
8016194	MAP3K14	5.5222	5.67085	5.82697	6.41068	6.6233	5.20777	6.76616	6.3234	6.28637	6.07007	6.33159	6.33294
7946128	FAM160A2	9.25418	8.2016	9.31217	7.75087	8.06938	6.62257	7.93701	7.78751	8.03128	8.05942	7.82301	8.10038
8003344	SNAI3	5.45796	5.80783	5.99078	6.579	6.22954	6.66131	5.60207	5.92156	5.72947	6.30468	6.23541	6.54202
8171587	PHKA2	7.71087	7.13308	7.84433	6.603	6.92392	4.86716	6.59729	6.56382	6.54411	6.97308	6.91935	6.91066
8032974	SAFB2	7.01415	7.23845	7.00686	7.4081	7.7892	5.92376	7.01462	7.31233	7.57177	7.63742	7.63489	7.72203
8133914	DMTF1	7.21049	6.56635	6.8459	6.38017	6.15205	5.36251	6.83902	6.77214	6.75839	6.14105	6.10196	6.50378
8054092	TMEM131	7.25743	6.42362	7.25908	6.18767	6.2762	4.28367	6.92879	6.99087	6.9242	6.18612	6.12636	6.4207
8147221	OSGIN2	6.71593	7.4902	6.88737	7.40634	7.19256	5.06842	6.41511	6.4311	6.45725	7.55769	7.64814	8.10972
8156404	CARD19	8.54633	9.32137	8.40311	8.16465	8.30063	7.18339	7.92692	7.98208	8.23165	7.92682	8.10935	7.94731
7953383	SCARNA10	6.02405	5.86787	5.71722	6.66788	7.31755	5.91525	5.38902	4.00668	4.1956	7.5526	7.22243	6.63039
8141445	C7orf43	6.81502	7.47474	7.75157	8.28988	8.48902	6.02328	6.58901	6.92811	6.63883	7.80854	8.38189	8.56319
8105647	TRAPPC13	4.21834	4.20612	4.4947	3.63948	4.0501	3.80521	4.5632	4.42411	4.53912	3.87858	3.37462	3.85004
7997680	GSE1	4.78883	5.98587	4.98854	6.19915	6.50155	6.04476	6.53585	6.73553	6.41462	6.09739	6.0868	6.92145
8087252	MIR191	4.99374	5.66445	5.28304	6.22321	6.32695	5.84731	4.92539	4.71832	5.16586	6.01445	7.40386	6.06923
7990657	TBC1D2B	7.47623	7.9362	8.15234	6.95889	7.27671	6.02755	7.12305	7.58262	7.31282	6.79066	7.24388	7.28507
8159004	SNORD24	6.84566	6.6151	7.22135	7.65219	7.24804	7.06001	7.0343	6.9422	7.07459	7.62878	7.81845	7.27786
8082003	EAF2	8.55495	7.41308	7.46722	6.83669	6.18416	4.61808	7.96734	8.06741	7.64517	6.76859	6.45567	6.98136
8173713	MAGT1	6.34048	5.54852	5.16135	4.99469	4.94794	4.51887	5.92283	6.02072	5.80854	4.76488	4.71942	4.96679
7980603	---	4.27854	4.38185	4.02681	5.49594	5.45871	3.67603	3.49542	3.59892	3.80502	5.43313	4.78996	4.61284
8108163	C5orf24	6.70386	6.22989	6.1776	6.05086	5.81569	4.61438	7.6038	7.45346	7.61674	5.59291	5.99876	5.73061
8084715	---	7.11718	7.48284	6.4252	6.6026	6.37856	4.80456	9.21835	9.39186	9.33048	6.05489	6.12552	6.39268
8110522	CANX	8.94501	9.27669	8.54111	8.36104	8.38659	5.71424	10.089	10.1798	10.2025	8.22567	8.10457	8.50954
7997940	RPL13	7.21013	6.48053	6.57471	7.59348	7.46503	7.16282	7.32649	7.08951	7.20104	7.57329	7.97765	7.16586
8022488	ABHD3	7.07232	7.33159	7.78773	8.24007	7.67883	4.76042	6.67825	6.60884	6.74415	7.91289	8.1648	8.27443
8106271	NSA2	7.62602	7.16559	6.51418	6.17399	6.34577	5.29314	9.06402	9.17583	9.86767	6.11187	6.14345	6.13798
7964602	LRIG3	3.21959	3.4203	3.06025	3.41331	3.41823	4.34417	3.48838	3.50536	3.3223	3.68828	3.79802	3.56936
7962829	SNORA2B	2.56016	2.41954	2.52836	2.79398	2.70968	3.37228	2.59274	2.57526	2.51417	3.5241	3.47338	2.65788
7979548	GPHB5	4.99933	5.05334	4.86051	5.48298	5.14875	5.0322	4.52088	4.56936	4.54809	5.40839	5.30769	5.51626
8128886	---	6.43089	7.14208	6.86368	8.14377	8.07607	5.81565	6.12695	5.76371	6.64416	7.64169	7.59002	7.61087
8121911	CENPW	4.38491	6.00379	3.96144	3.66018	2.53122	4.16437	6.75121	6.49211	6.44431	2.79275	3.15537	3.44038
8027448	DPY19L3	6.33548	4.88257	5.30863	4.03564	4.29456	3.22885	3.70851	2.90811	3.315	4.06135	4.37376	4.53833
8176159	CTAG2	6.12108	6.33078	5.88447	6.56926	6.45663	7.17195	6.0903	6.12295	6.12935	6.5226	6.56221	6.60119
7939068	---	8.9669	8.92971	8.41913	8.77948	8.77565	6.79693	10.8557	10.6207	11.0357	8.29671	7.8167	8.20952
8063955	OGFR	7.22349	7.27258	7.36315	7.20262	7.49428	7.36087	7.36874	7.18185	7.25873	7.76885	7.83298	7.58665
7912385	EXOSC10	5.75783	5.72774	5.46706	5.42647	5.61299	4.94032	7.46172	7.63565	7.9751	5.17062	4.93827	5.17626
7909708	CENPF	3.06143	3.50504	3.47911	2.77569	2.68452	4.3117	2.80649	2.79472	2.80853	3.06565	2.55206	2.70573
8164100	RPL35	8.28072	9.00334	7.52058	7.48875	7.87369	6.44225	11.1472	11.2185	11.3456	7.10576	7.04449	7.43457
8088054	TMEM110-MUSTN1	7.7267	6.06513	7.61359	6.04991	5.81045	5.85791	6.2499	6.30648	6.52957	6.10621	5.91367	5.29037
7984759	TBC1D21	3.21613	3.45966	3.57709	3.85727	3.51367	4.13026	3.12182	3.34232	3.34249	4.03247	3.8401	3.9025
8026533	HSH2D	6.06867	8.1432	7.92225	9.16235	9.46542	6.10015	6.59392	7.39284	6.88632	8.47895	9.63209	9.29153
8129604	TAAR5	3.08324	3.39089	3.41191	3.10728	3.09561	3.94289	2.99663	3.15188	3.1066	3.9226	3.73757	3.61911
8094228	BST1	9.88934	9.68243	10.2668	9.24958	9.2272	5.66448	9.25065	9.23518	9.27769	9.17734	9.54366	9.43883
7922656	ACBD6	5.52991	4.97477	5.10222	4.48488	5.01269	4.52478	6.42151	6.61067	6.61794	4.67787	4.61916	4.30359
8048772	RHBDD1	6.39138	5.59698	6.31461	5.64519	5.83985	4.94212	7.40594	7.65256	7.63727	5.07243	5.2272	5.65216
7949916	CHKA	6.75784	5.37317	4.98903	4.75309	4.70461	4.82657	5.49569	5.94275	6.01573	4.56706	4.50603	4.06871
8087461	GMPPB	5.37299	5.77107	5.46147	5.75957	5.62906	5.27914	5.63226	5.46087	5.62958	5.9227	6.05986	6.00674
7915846	MKNK1	10.6216	9.82195	9.98827	9.43321	8.79883	7.30305	8.4997	8.34188	8.45375	9.1945	9.35206	9.52856
8128777	AK9	3.78127	3.3636	3.73299	3.31796	3.27276	3.86788	3.23595	3.38125	3.25311	3.18109	2.98407	3.2498
8137979	ACTB	12.3917	11.9383	12.0113	11.648	11.3985	9.0626	11.3397	11.2795	11.3147	11.3525	11.6037	11.7471
7910706	LGALS8	7.88463	7.03273	7.30341	6.03911	5.52494	4.29023	7.22769	6.95046	7.25734	5.5765	6.73984	6.59561
8093685	HTT	6.66062	5.52366	5.45168	4.87302	4.89468	4.07033	7.10351	6.83108	6.91151	4.75933	4.97293	5.03129
8033605	MYO1F	11.0637	11.1018	11.3224	11.5997	11.6103	8.53339	10.3247	10.2421	10.3099	11.4342	11.6028	11.7328
8062490	SNORA60	6.82372	6.50164	6.35247	6.87286	7.52982	8.20137	6.73876	6.36058	6.47456	7.66369	7.92838	6.91139
8108217	TGFBI	4.18329	4.14629	4.4388	4.49736	4.41828	4.085	9.77478	9.92468	9.85431	4.628	4.61174	4.98224
8019765	ARHGDIA	9.57879	9.94338	8.93435	9.10835	9.31323	6.01689	9.54993	9.42814	9.60623	8.75796	8.6291	8.7962
7903010	RPL5	6.23404	6.6085	5.77435	5.94074	5.64336	5.06893	7.59959	7.76176	7.5338	5.47917	5.16464	5.70845
8139943	SPDYE7P	5.86587	6.1366	6.27465	6.3468	6.68821	7.92984	5.85271	6.13157	5.90231	6.4386	6.82418	6.73546
8116348	TBC1D9B	6.02845	5.73796	5.50089	5.14059	5.02421	5.80053	6.67539	6.77773	7.07542	5.07817	5.24682	5.25844
7959563	C12orf65	3.89484	3.9198	3.77773	4.26709	4.28851	4.67547	4.02496	3.9915	3.9816	4.27462	4.2948	4.1271
8083630	GFM1	4.55411	3.97031	3.67506	3.49072	3.38326	3.60246	6.26292	6.28822	6.15148	3.49335	3.26222	3.39219
8107066	LNPEP	7.39545	7.13351	7.24043	6.51667	6.07756	5.72176	7.12311	7.1832	7.38982	6.59679	6.26453	6.93886
8012961	NCOR1	8.09343	8.25079	8.60584	8.11346	7.96085	6.63147	8.14233	7.9387	8.13617	7.57551	7.71164	7.97115
8002051	AGRP	4.84241	5.159	5.02069	5.41768	5.43288	5.00435	5.27642	5.17624	5.22536	5.42496	5.4652	5.34156
8123678	PXDC1	3.24806	3.4706	3.14086	3.59114	3.12963	4.24653	3.69498	3.79589	3.80816	3.64879	3.90816	3.89979
8138922	KBTBD2	7.57612	7.68273	7.58556	8.02877	7.67215	6.19471	6.968	7.20908	7.16124	8.07153	7.99384	8.12503
8040639	HADHB	7.90678	7.65184	7.73714	7.26509	7.05361	5.89123	7.84116	7.91747	7.91102	7.04569	7.2424	7.51383
7915659	HECTD3	6.60594	6.00994	6.16342	5.93551	5.5964	5.00116	6.40634	6.39398	6.89154	5.35516	5.28849	5.84025
8035187	MED26	5.91171	6.15529	5.69615	6.06684	6.35157	4.56347	5.94864	6.01741	5.95039	5.24048	5.23869	5.61916
8163733	CDK5RAP2	5.28671	5.57316	5.49998	5.03217	5.02356	4.90962	5.35268	5.07108	5.45534	4.56612	5.13239	4.91036
8120600	---	3.55819	3.51167	3.38403	3.37314	3.27463	4.02964	2.94832	3.00723	2.95368	3.0162	2.98444	3.24484
8111099	---	5.82664	5.58027	5.64079	5.43606	5.31891	4.59141	7.07448	7.05257	6.74992	5.15229	5.31654	4.54678
8025697	ILF3	5.16678	5.91437	5.03496	5.12153	5.52118	5.37461	8.12084	8.13429	7.9205	4.3538	4.81607	4.53752
8116710	CDYL	5.98539	5.61016	6.3357	5.87093	5.67107	5.96535	6.77277	6.24422	6.54358	4.88901	5.18152	5.51916
7935054	EIF2S2P3	5.40073	5.74609	5.19273	4.83554	4.83781	5.56216	5.34164	5.17907	5.12115	4.62269	5.00682	4.98375
8180319	---	5.07756	4.693	5.11749	5.74167	5.33864	4.17698	6.60907	6.5816	6.83125	5.76078	5.61917	5.33234
7957602	---	6.02707	5.55458	3.78412	3.94019	3.38902	3.01145	3.56119	4.25315	3.41361	3.54484	3.22105	3.54399
8146930	TMEM70	6.84411	6.64179	6.44026	6.07626	5.15365	4.37932	6.10106	6.55118	6.29463	5.24559	5.49145	6.20235
8167763	TSPYL2	5.15303	6.29551	4.70356	6.9697	7.63852	5.68475	5.7782	6.51257	6.06895	6.51642	6.9222	6.57719
8124654	GABBR1	5.88646	6.24556	6.80985	5.61572	5.31556	4.9021	7.65011	7.51168	7.56485	4.8312	5.62836	5.69003
7961964	ASUN	5.85302	4.10513	4.62645	3.13649	3.21342	3.23032	5.32764	4.91452	5.47366	3.49018	3.42327	3.85587
8105741	MAST4	5.68851	4.81189	5.34979	4.54972	4.59603	4.94203	4.17833	4.15001	4.2011	4.58979	4.69283	4.60231
8180244	---	7.3345	6.83026	7.58671	6.21496	6.09274	5.34458	5.51021	5.14772	4.95921	6.08275	6.72185	6.53001
7904830	RNF115	6.00097	5.7601	4.74922	5.00369	4.53558	3.50981	6.80817	6.52839	6.31392	4.41164	4.39735	4.655
7940118	CNTF	6.09435	5.88046	5.84659	5.59591	5.62777	5.63805	6.02713	5.86342	5.85824	5.31358	5.4747	5.67212
8023063	ATP5A1	7.21586	6.01377	6.19468	5.88476	6.09866	4.2385	8.31578	8.09524	8.35202	5.51243	5.30643	5.75044
8068375	SMIM11B	5.28306	4.96402	5.41406	4.60709	4.1015	4.32634	6.41058	6.32925	6.30124	4.56965	4.39304	4.84114
8033746	ZNF699	4.37316	3.98316	4.10723	3.61029	4.17904	4.27975	3.50147	3.45435	3.59418	3.63409	3.55911	3.59401
7936727	RPL21	8.07786	8.10679	7.59467	7.58506	7.53625	5.60966	9.65462	9.86514	9.95398	7.45825	7.13487	7.45118
8030199	SNRNP70	6.89159	7.14594	7.22428	7.60115	7.66804	7.47931	7.63384	7.51235	7.53659	7.4178	7.48897	7.79645
7968331	---	10.3167	9.90791	9.77796	9.59875	9.40824	6.98473	10.0788	10.1866	10.2931	9.34354	9.40874	9.61049
8001981	FHOD1	6.82919	7.3218	6.37178	6.35196	6.43201	5.65344	6.37014	6.34316	6.54648	5.72512	6.04766	6.3457
8099721	SEL1L3	8.13994	5.44721	6.11205	5.05256	4.72161	4.64829	4.41636	4.30271	4.74275	4.67344	4.48593	4.96969
8082408	SEC61A1	8.13149	7.28842	7.09333	6.85467	6.95496	5.62326	8.74184	8.55276	8.63583	6.45841	6.52335	6.96583
8096301	SPP1	3.47167	3.99508	3.65672	4.84688	5.55092	3.6911	2.93328	3.2303	3.54839	5.07563	4.08426	5.15052
8167880	PAGE5	5.42152	5.36796	5.32558	5.65594	5.55237	6.25099	5.34278	5.0714	5.1079	5.90289	5.8559	5.6407
8058428	NDUFS1	5.87775	5.79122	5.8657	5.43663	5.27585	3.2436	6.34813	6.01201	6.32126	5.12334	5.27615	5.58568
8134460	BRI3	6.07693	7.1629	6.19285	5.08166	5.2233	4.26454	4.99071	5.77197	5.06088	5.10025	5.69187	5.46948
7921583	COPA	8.93603	7.72165	8.28948	7.60573	7.43358	5.0472	8.2733	8.04534	8.31142	7.22315	7.26109	7.69912
8011110	---	6.13667	6.30396	6.5307	7.0382	6.74254	5.91672	6.27949	5.89447	6.17178	6.73697	7.01658	6.86011
8157691	---	4.19252	5.07625	4.72482	2.76424	3.2996	3.30369	5.50108	5.55715	5.59948	4.05156	3.47557	3.96928
8052680	RAB1A	10.1565	9.97799	9.86217	9.68318	9.59306	7.56933	9.32614	9.53691	9.18698	9.47777	9.25607	9.69543
8063755	FAM217B	7.03406	5.98839	6.97113	5.4774	5.40941	4.82137	5.27446	5.18709	5.33926	5.54802	5.92995	5.9331
8022972	---	9.34789	9.44489	8.7063	8.63862	8.63656	6.449	11.1375	11.0237	10.8783	8.37916	8.06387	8.76307
8136654	---	2.87392	3.17429	4.39084	3.89974	4.39632	3.72545	2.8236	3.30916	2.49155	4.65961	5.42869	4.47896
8047463	---	2.24847	2.3085	2.40245	1.80259	1.94222	3.74806	2.34947	2.42072	2.2706	1.98138	1.99058	1.83161
8026971	IFI30	11.0472	11.0589	10.9952	10.1325	10.3207	8.65862	11.5046	11.8054	11.5281	10.4586	10.7547	10.5186
8017867	FAM20A	5.36682	3.77826	5.22293	3.40644	3.75121	4.06608	3.17067	3.47341	3.41434	3.71486	3.53922	3.52386
8155849	ANXA1	11.7667	10.7408	11.1128	8.76131	6.97456	5.72393	11.5081	11.4225	11.0779	9.61043	8.61133	10.2499
8062603	TOP1	7.69008	7.94057	7.89654	8.34158	8.36026	5.43995	7.49581	7.61221	7.6941	8.24283	8.45365	8.14616
8110803	CLPTM1L	6.35914	5.93676	5.8048	5.88469	5.68757	5.52101	6.79805	6.72515	6.29138	5.29569	5.40753	5.5153
8153405	RHPN1-AS1	4.84381	4.92789	4.58595	4.06892	4.03912	4.52517	3.91328	3.95283	3.89184	3.99749	3.8436	4.59617
8114536	TMEM173	6.34621	6.48857	6.36087	5.93525	5.47095	5.1364	7.76646	7.72559	7.80538	5.75923	5.66807	6.12733
8126288	TREML2	7.70329	8.59532	8.01895	8.56365	8.74927	6.0293	5.33913	5.29753	4.93608	8.58061	8.99528	9.39129
8124440	HIST1H3G	2.78951	2.86264	2.68984	2.68263	2.74678	2.91286	2.48363	2.53725	2.51014	2.47824	2.39799	2.39482
7945902	NUP98	8.02131	8.25221	8.48038	8.54244	8.79063	5.56294	7.42414	7.50326	7.45331	8.60134	8.74947	8.96858
8016532	GNGT2	3.27928	4.43187	3.93445	4.16634	4.5807	4.4091	4.88933	5.06584	5.00885	4.75144	4.68459	4.74878
8009666	RAB37	5.26474	5.5096	5.38775	6.13693	6.05306	4.675	4.66247	4.63192	5.20285	5.85728	5.88591	6.25368
8060839	CRLS1	6.86855	5.74258	6.74941	5.24234	5.72486	4.04094	6.86508	6.69032	6.4723	5.25713	5.39022	5.76082
8023889	MBP	6.31009	7.40822	6.78019	7.5573	7.79525	5.49558	5.83976	5.73598	5.92256	7.37701	7.74681	8.08205
7934570	KCNMA1	7.80002	3.94249	7.24855	3.75559	3.48103	4.11944	3.33828	3.70807	3.14658	3.6334	3.56329	3.80078
8159667	TOR4A	6.59938	6.4192	6.30849	5.96739	5.98685	5.7612	6.42304	6.15333	6.49352	5.87351	6.05836	6.02608
8049620	FAM132B	4.71767	4.73186	5.0028	5.25774	5.20887	5.6161	4.77196	4.75411	4.96707	5.15784	5.37066	5.23192
8103769	HPGD	10.2151	3.44836	8.63103	2.58285	2.63157	2.83835	2.6368	2.42724	3.02594	2.81001	3.17669	2.93872
8011212	---	7.57209	6.0018	7.11826	5.90508	5.75847	4.8971	6.62228	6.56064	6.92004	5.74928	5.9516	5.67144
8061772	MAPRE1	9.24414	8.68549	8.87451	8.88933	8.5901	8.33344	8.59519	8.7362	8.35123	8.04387	8.54291	8.25968
7996919	VPS4A	7.14238	6.82873	7.0748	6.6648	6.64076	5.82826	7.4605	7.18747	7.3276	6.30976	6.58758	6.6829
8151032	GGH	3.61135	5.13765	4.48142	3.36388	3.03945	3.26058	3.79372	3.22454	3.36085	3.49327	3.2142	3.17203
8089795	COX17	7.01152	7.12822	6.96492	6.08426	6.46623	4.6035	7.55215	7.46834	7.56463	6.07299	6.30208	6.81685
7929114	---	4.7639	4.92263	4.76412	4.4173	4.43341	4.19266	5.77027	5.72172	6.17966	4.28243	4.44778	4.26278
7980535	---	5.79842	4.50305	4.30934	4.65349	4.1207	2.68845	6.93088	7.15587	6.61379	4.01391	3.15945	3.59762
8108370	EGR1	9.32636	10.4011	9.46384	10.2735	9.5551	8.42912	10.1281	10.3502	9.96663	8.2089	8.43778	9.15425
7906056	MSTO1	3.94274	5.246	4.33798	5.40348	5.68836	6.09017	5.29052	4.93116	5.2916	5.20958	5.85604	5.55499
8164848	---	3.23178	3.62061	2.32145	4.15683	3.84554	2.60532	3.85637	3.5651	4.15573	3.79578	4.24977	4.24199
8178489	HLA-F	12.1412	12.3865	12.4421	12.911	12.9758	10.7928	12.1133	12.4032	12.1704	12.7416	12.6757	12.969
8147079	LRRCC1	3.38389	3.37735	3.30524	3.01516	3.13271	4.06675	3.97391	3.82164	3.81036	3.00415	2.87597	3.05405
8112202	PLK2	3.76133	3.85454	3.92173	6.49658	6.69098	4.25706	5.55296	6.23148	5.6902	4.57832	5.4609	4.32246
7911155	SCCPDH	5.2013	4.63208	4.95853	4.63085	4.85837	3.96075	6.1233	6.02013	6.10268	4.12437	4.34514	4.57652
7961440	PLBD1	11.0784	10.2883	10.9136	9.81013	9.45385	5.46219	10.1831	9.8675	9.48448	9.71036	9.57729	10.2683
8019885	SMCHD1	8.85464	10.1506	10.1765	11.0334	10.8569	8.01728	7.93272	8.36367	7.77063	10.6959	11.0422	10.7387
7964803	IL22	3.16543	3.072	3.18004	3.25754	3.17083	4.6978	3.11527	3.08579	3.12409	3.59013	3.4011	3.51067
7912481	MAD2L2	7.57273	7.51211	6.76869	6.42639	6.57238	5.15967	6.65273	7.05185	6.98206	6.34584	6.51379	6.74819
7912292	LZIC	6.65657	6.35229	6.38252	6.41139	6.25278	5.22316	6.57115	6.54394	6.75107	5.95859	5.86783	6.16716
7986769	UBE3A	6.41536	5.80191	5.41608	5.15857	4.83968	5.55878	7.70596	7.54443	7.46574	5.02775	4.90077	5.31694
7936884	FAM53B	5.93857	6.31924	5.83901	7.04181	7.19387	5.61465	6.37335	6.74918	6.5192	6.42111	6.6096	7.08839
8163428	INIP	5.8845	5.99762	5.77046	6.26254	6.23006	6.25222	6.68873	6.70603	6.44545	6.28701	6.23063	6.36314
8083826	SEC62	8.02034	7.58671	8.09941	6.97992	7.05669	6.18591	6.7123	6.50121	6.76276	7.41135	6.87463	7.46867
7942586	RPS3	10.1494	10.2055	9.96257	9.85457	10.2128	7.64269	11.8421	11.6341	11.8345	9.43386	9.58593	9.78932
8108478	CYSTM1	10.5856	9.03956	9.27683	8.15269	8.17885	5.91298	5.79723	6.32899	6.12758	7.92643	8.64223	8.60775
8146914	TERF1	6.68975	6.52374	6.83084	5.61508	6.70259	5.49445	7.0172	7.03812	6.71762	5.76967	5.4468	6.1102
8140367	CCL24	4.38652	4.58612	4.53215	4.87831	4.44723	4.73353	4.32243	4.60977	4.43994	5.02306	5.00014	4.92632
7999642	KIAA0430	8.25463	8.76886	9.23186	9.70011	9.42093	6.21627	8.42566	8.30727	8.08969	9.28169	9.69333	9.66858
8135876	SND1	5.85672	5.6974	5.47143	5.17216	5.05013	5.24902	7.66993	7.3482	7.73808	4.32245	5.25495	5.08687
8137334	ABCB8	4.78577	5.01629	4.99357	5.42931	5.29257	5.91718	4.95502	4.86473	5.09779	5.28182	5.35606	5.3744
7967454	---	5.20476	6.14963	5.54328	4.6852	4.95186	4.622	4.35459	4.92288	4.19217	4.78712	4.92071	4.57097
8035477	ELL	7.57344	7.57899	7.45412	7.94511	8.2176	6.1547	6.1498	6.41762	6.51788	7.82678	8.10978	8.1761
7971731	ATP7B	3.59603	4.09442	3.89391	4.52051	4.37907	4.35167	3.37482	3.61582	3.65688	4.44081	4.79577	4.20496
8041281	YIPF4	8.63818	9.021	9.35279	9.64887	9.57917	7.53418	9.04349	9.13542	8.8211	9.4967	9.72281	9.60573
8093053	TFRC	6.23741	5.54056	3.92576	4.00263	4.01709	4.27958	5.21009	5.17001	5.7054	3.4675	3.68071	3.84892
8102592	---	3.37913	3.16369	3.21223	3.50295	3.41403	4.17863	3.14353	3.30502	3.31055	3.89442	3.52353	3.669
7917670	---	5.97812	6.2112	5.98641	6.4472	6.24419	6.23141	5.97702	5.89593	6.00093	6.3889	6.50052	6.48604
8108015	HSPA4	6.34275	6.32466	6.29591	6.0767	6.05792	4.68388	6.88881	6.66108	6.92282	5.7505	5.50526	6.11292
8162019	KIF27	5.06831	5.12726	6.14282	6.84897	6.40517	4.00109	4.97139	4.44003	4.55448	7.25299	6.09686	6.52318
8077366	LRRN1	7.90742	6.52455	8.34492	5.7353	5.00198	4.61899	2.40445	2.84151	3.04741	5.69527	5.5273	6.7615
8112519	LOC441081	9.68436	8.00406	9.25629	7.16666	6.70227	8.16322	8.1178	7.90084	8.44016	7.45399	8.13123	7.42962
7901748	FGGY	5.96416	5.73391	6.26376	5.25031	5.66043	5.41809	4.71264	4.98166	4.99943	5.17493	5.53533	5.42363
8117620	OR2W6P	3.8481	4.25705	4.19528	4.44526	4.43869	4.31681	3.34476	3.40098	3.71869	4.37217	5.0541	4.84206
8146533	FAM110B	4.55363	4.41861	4.72706	4.14661	4.02566	4.21535	4.23118	4.09372	4.42003	4.13013	4.21267	3.97177
7920487	C1orf189	2.97258	3.98576	3.11972	4.38412	3.97166	3.977	3.59589	3.05379	2.88562	4.07401	4.84905	4.28298
8138108	KDELR2	6.90993	6.96024	6.60242	6.62301	6.79426	4.14779	7.40546	7.54845	7.57022	6.27811	6.0715	6.54952
8140878	KRIT1	5.99129	5.83583	5.99869	5.71955	5.1032	4.92031	6.77277	6.48472	6.61378	5.34347	5.17948	5.53878
8090852	AMOTL2	3.44831	3.90651	3.74305	4.45784	4.21808	3.70322	3.49432	3.49403	3.42918	4.30124	4.15304	4.08653
7944096	RNF214	5.26598	4.66871	5.2666	4.55177	4.53492	4.36244	5.8754	5.83351	5.78313	4.33844	4.41018	4.69124
8043480	IGKV1D-33	4.11072	3.80069	3.68618	4.22577	4.17144	4.40572	4.18041	3.74836	4.31953	4.71754	4.79675	4.18018
8137942	TNRC18	6.54932	6.59641	6.61799	6.80027	6.9782	5.07521	6.30943	6.1665	6.4046	6.87052	7.23843	6.9842
8019183	ACTG1	12.0718	11.9991	11.7834	11.6434	11.6445	8.93112	11.6321	11.6134	11.7159	11.4863	11.5685	11.6268
8008052	SP2	5.93417	6.20659	6.31817	6.60819	6.92763	5.3249	6.18387	6.2111	5.99751	6.49766	6.78334	6.70344
8103043	SLC10A7	6.12305	4.57502	5.16967	4.53264	4.78257	4.62004	5.41392	6.08762	6.01915	3.99595	4.39499	3.98611
8114918	---	3.40723	2.98947	3.2853	3.10564	2.98212	4.89822	3.28713	3.10274	3.29805	3.78348	3.61512	3.66542
8136039	ATP6V1F	8.59215	8.30066	8.0001	7.84515	7.88651	5.54314	9.48492	9.59582	9.69438	7.68875	7.88247	7.75781
8063497	CASS4	5.44888	7.05808	5.75936	7.64923	7.88555	3.70556	5.12027	4.76569	3.90861	6.95623	8.06019	7.84783
8001082	SLC6A10P	5.26342	5.43801	5.30556	6.05536	5.69642	4.95362	5.48651	5.38431	5.25465	5.88703	5.71529	5.74844
8141708	CLDN15	5.55971	5.78297	5.76419	5.74415	5.88505	5.84286	5.37288	5.11837	5.55714	6.13709	6.26521	6.11371
8079140	SNRK	8.67811	8.93648	9.3141	9.37439	9.48495	6.03523	7.6364	7.88318	7.60451	9.63972	9.468	9.502
7930482	ADRA2A	4.22869	4.41323	4.21282	4.38319	4.38831	5.68359	4.14527	4.09051	4.09795	4.6855	4.70478	4.56506
8163383	SUSD1	6.84734	5.79671	6.60051	5.43655	5.70352	4.90285	7.86855	7.7269	7.33705	5.43729	5.69027	5.55491
8026300	ADGRE5	11.1359	10.9881	11.3031	11.6741	11.4282	8.06019	10.6123	10.4308	10.4965	11.4223	11.6497	11.8465
8070297	ERG	4.33433	5.64676	5.8963	4.23563	4.05811	4.16375	3.84147	3.57157	3.45035	4.43912	3.73283	4.1118
7931500	ADGRA1	4.28576	4.32358	4.44293	4.59689	4.42863	4.45875	4.36891	4.15035	4.38117	4.70981	4.78053	4.73863
8017810	PSMD12	5.6103	5.55314	5.27517	5.21681	5.30326	4.87502	5.94498	5.97679	6.08505	4.70299	4.89121	5.25037
8042416	ARHGAP25	8.05289	8.60183	9.07988	9.59224	9.64294	6.6479	6.73865	7.05272	7.01914	9.13169	9.5588	9.41192
8071927	GGT1	8.28239	8.25164	8.12229	7.75071	8.12095	7.36156	7.55788	7.40283	7.47871	7.61059	7.52732	7.97703
8103834	AGA	7.55087	6.33552	6.16968	5.23325	4.85881	4.02782	8.28305	7.40076	7.9984	5.7549	4.27315	5.5021
7899813	RBBP4	7.49845	7.01661	7.11906	6.72287	6.92496	4.70377	8.77804	8.15062	8.69218	6.33988	6.35016	6.81462
8171758	SCARNA9L	5.28356	5.91561	6.13248	5.86317	6.07997	4.61872	5.69288	5.86092	5.30654	6.30122	7.42972	6.66127
8071134	LINC00528	7.90454	9.58343	8.2202	10.1636	9.99188	7.69997	7.3724	7.5076	7.00713	9.46784	10.3977	9.81543
8037363	CADM4	4.87248	5.08151	5.39425	5.42	5.44879	4.65157	5.00904	4.87235	4.99548	5.67017	5.72152	5.45292
8030064	CYTH2	5.56987	6.24307	6.3517	6.73506	7.04297	6.54063	5.48125	5.97147	5.73147	6.94987	7.16511	6.50788
7904921	---	2.9022	2.91427	2.98037	3.25919	3.11639	4.53854	2.99816	3.20011	3.15842	3.90691	3.36077	3.23706
7984112	RAB8B	8.78226	8.72876	8.4334	7.98455	8.31961	4.87837	7.31842	7.11904	7.18809	8.15486	8.15826	8.22876
8149625	---	3.35727	3.42138	3.44916	3.62692	3.83969	4.37821	3.61626	3.27878	3.45703	4.20639	4.06149	3.62305
8022110	ZBTB14	4.83578	4.2668	4.60879	3.96424	3.8887	4.34024	5.21109	4.90211	5.24905	4.21973	3.92475	3.7028
7934367	ANXA7	7.11458	7.42292	6.91586	6.6969	6.41735	5.67166	7.11314	7.35217	7.03497	6.35685	6.12057	6.86885
7949776	CORO1B	5.60734	6.00623	5.93727	6.49655	6.2872	5.63169	6.13984	6.25087	6.52888	6.26569	6.33643	6.53173
7925622	AHCTF1	6.53008	7.21283	7.53015	8.09974	8.02129	6.24469	6.00764	5.99336	5.91125	7.61519	7.89163	8.0346
7945283	ACAD8	6.33805	5.488	5.90727	4.92724	4.96394	4.77695	5.27369	4.59597	5.01001	4.54181	5.22147	5.27912
8107474	DMXL1	5.36102	4.74256	5.55692	4.61496	4.70525	4.60459	6.19676	5.81184	6.0706	4.15415	4.51815	4.73295
8086842	MAP4	7.03364	5.54028	5.69151	4.97159	4.87889	5.29068	6.12411	5.96975	6.07089	5.01285	4.9592	5.09281
8046573	MTX2	3.83041	2.88088	3.70416	2.59506	2.68485	4.22856	5.21619	5.48527	5.41049	2.60667	2.71259	2.85406
8061114	DSTN	5.72323	5.47453	5.15619	5.70208	5.08989	4.28069	5.46528	5.58104	5.78488	4.96827	4.60121	4.75797
8121861	NCOA7	5.52345	5.75573	6.1846	4.75081	4.39029	4.3053	5.07714	5.57271	5.3621	5.36542	4.98428	5.03934
8018169	CD300LB	5.46884	6.51962	5.66333	8.01468	7.42814	6.17453	7.88686	7.90295	7.66884	6.68913	6.89408	6.66771
7918323	SORT1	10.7553	7.85819	9.27302	6.87855	6.43672	6.13629	8.00373	7.58733	8.02572	7.65899	6.85748	7.5915
7912854	ESPNP	4.36179	4.88075	4.77678	5.71654	5.43148	6.92	4.59366	4.98893	4.85586	5.36608	5.42882	5.04932
7982878	CHP1	10.1443	9.61673	9.25207	9.24723	9.3081	5.54531	10.126	9.89608	9.90439	8.84883	8.92352	9.17254
8048993	---	7.90489	6.61981	7.54418	6.59786	6.96088	7.42079	6.05187	5.36003	5.54788	6.06733	6.30903	6.55684
8170390	IDSP1	9.90549	10.0933	9.64887	10.6389	10.2931	8.69581	8.98759	8.71408	8.78329	10.3715	10.3328	11.031
8112476	LOC441081	9.93196	8.06926	9.88295	7.16584	6.75648	6.52652	8.25119	7.899	8.50366	7.32918	8.00105	8.06397
7983811	PIGB	5.81378	6.93561	6.08211	7.65884	7.65898	4.80094	5.47155	5.14696	5.01667	6.71865	7.60915	8.12808
7919606	HIST2H2BF	7.33663	9.19609	7.94123	9.85683	9.52157	6.2429	6.32195	7.73552	6.87167	9.3818	9.77169	9.93506
8058837	PECR	6.26464	4.69468	6.6773	3.99444	4.10879	4.76393	4.03604	4.1948	3.96612	4.43275	4.29478	4.80961
8133057	ZNF138	4.51962	4.38358	4.66093	5.09236	5.65767	4.81749	5.06894	4.57977	4.5992	5.17483	5.55828	4.95919
8119052	PNPLA1	6.22094	6.76913	7.1753	5.81593	6.28039	6.52082	5.10855	5.35592	5.22609	5.96168	5.92092	6.04809
8140170	GTF2IRD2B	5.49997	5.22672	5.74422	5.04794	5.1133	4.7146	5.53664	5.15767	5.47645	5.14735	4.73624	4.85475
8064581	UBOX5	6.923	6.79489	6.6206	6.55201	6.86133	4.40599	6.41923	6.31029	6.30246	6.48934	6.22851	6.2376
8077513	THUMPD3	6.26486	6.35039	5.21893	6.1188	5.66844	4.74301	6.29115	6.89966	6.69766	4.57061	4.54034	5.37475
7999886	LOC105371114	3.16214	3.37938	3.28544	4.19646	3.96364	3.19754	3.23221	2.85844	3.41256	4.06649	3.80624	3.65979
8137008	---	9.92508	9.48049	10.5448	9.30615	9.31037	7.79389	9.97561	10.2737	9.88511	9.21607	9.22743	9.2023
8180297	---	8.73069	9.09527	7.7866	7.96834	8.20116	5.24733	11.8309	11.7197	11.7612	6.93059	7.33806	8.00163
8172531	PRAF2	6.43003	7.13614	6.53474	7.03391	7.61268	5.49845	5.50173	5.72904	5.72983	7.1814	7.71355	7.48122
8060734	MIR103A2	5.54305	6.66795	5.82406	7.16206	6.78577	3.42943	5.58719	5.92239	5.23026	6.88354	6.77022	7.38459
8005171	TRPV2	6.31248	5.43329	6.01396	5.12264	5.21231	4.74711	5.99458	5.91747	6.17571	4.79406	5.07705	5.51565
8142993	---	6.36197	6.30293	6.14422	5.84922	5.82631	6.92	6.83325	6.69975	6.45075	5.89886	5.83043	5.79953
8000791	YPEL3	8.24411	9.04077	9.16266	9.49586	9.4492	7.65817	7.3047	7.15109	7.03933	9.58478	9.54458	9.45328
8072710	APOL6	5.77359	6.71016	6.82481	6.91685	7.08873	4.83894	6.61021	7.04441	6.8261	7.31357	8.37018	7.11449
8071713	FBXW4P1	6.42622	6.32942	6.05894	6.03393	6.08706	6.05775	5.47656	5.5641	5.83835	5.6803	5.60379	5.97658
8090418	---	2.29236	2.30804	2.55695	3.02133	2.66002	2.47858	2.10389	2.30443	2.00874	3.01531	2.68637	3.02222
7924405	RAB3GAP2	6.89599	6.24279	6.58566	5.7902	5.59257	4.21852	5.9952	6.2119	6.07751	5.67906	5.68246	6.29029
7896865	TTLL10	5.69286	5.68517	5.64477	5.75077	5.69929	6.86433	5.47838	5.39477	5.58986	6.18206	6.01818	5.94799
7993035	UBN1	6.5579	7.26433	7.87989	7.99463	8.30769	5.60465	5.70929	5.94798	6.31908	8.03808	8.31864	8.28828
7902104	PDE4B	6.18428	8.16593	6.89968	7.75279	8.43357	6.55211	6.37583	6.96714	6.57571	8.46489	8.32014	8.64129
8153201	AGO2	6.521	7.41272	7.35525	7.71016	7.84851	5.67226	6.39701	6.62765	6.79996	7.8553	7.6711	8.1021
8139165	VPS41	6.32451	5.94747	5.86003	6.88942	6.92776	4.8445	6.93738	6.978	6.55442	6.71304	6.40205	6.72282
7915472	SLC2A1	6.55192	7.26481	7.35733	6.80486	6.87194	5.69864	5.61833	5.5754	5.93439	5.89685	5.78435	6.73372
8040618	RAB10	9.02502	9.36837	9.20355	8.38653	8.37096	6.11942	8.71334	8.77995	9.08429	8.10717	8.62033	8.88757
8078091	NR2C2	7.18252	7.01133	7.31279	7.29808	7.38224	4.18303	6.90936	6.58476	6.72716	7.64132	7.54742	7.59581
8131661	RPL21	8.12718	8.15555	7.6332	7.63884	7.5772	5.6734	9.73302	9.90198	10.0566	7.49035	7.21079	7.53114
8087271	QRICH1	7.31835	7.41506	7.00192	7.27405	7.1426	4.90388	8.00899	7.86644	8.00956	6.37505	6.73758	6.94759
8160308	RPS6	10.3347	10.8125	10.1581	10.12	10.2141	8.73592	12.0524	12.0982	11.9703	9.76507	9.8233	10.0406
8079170	TCAIM	5.57326	4.47816	5.04012	4.41592	3.91556	4.51696	4.8197	5.06311	5.10413	4.21261	4.18671	4.23193
8051387	DPY30	7.89961	8.02285	8.32803	7.92587	7.55383	5.31254	8.25409	8.31614	8.22389	7.07436	7.17291	7.86997
8157021	NIPSNAP3A	4.99313	5.5461	4.06123	3.94245	3.74632	3.72515	6.73115	6.53041	6.75942	3.55706	3.82754	4.10093
8141295	ATP5J2	8.52851	7.85478	7.91917	7.64012	7.43153	5.05201	8.81631	8.94563	8.83559	7.52632	7.52695	7.52782
7981161	SYNE3	6.53833	6.25352	6.67575	5.98583	5.81623	5.21098	7.20025	6.75768	6.98809	6.09055	5.64255	5.99643
8138708	HOXA1	3.42866	3.77771	3.44252	4.30408	4.96898	4.643	3.38605	3.84288	3.89345	3.96283	4.86353	4.3971
8084844	OPA1	5.8683	5.40298	5.00289	4.92539	4.87601	4.3858	6.3215	6.15003	6.17601	4.38124	4.51532	5.0732
8165648	---	10.9319	10.4509	11.3426	10.2605	10.3279	9.13599	10.9552	11.1603	10.9332	10.2153	10.3226	10.2313
8019908	---	3.75084	4.19304	4.46993	5.09974	4.4826	4.13001	3.9463	3.37158	4.04173	4.94623	4.98143	4.87391
8021113	C18orf25	6.55552	6.37304	6.72093	6.6094	6.48972	4.76604	5.70594	5.81995	5.47708	7.09163	6.85204	7.16233
8067055	ATP9A	7.00216	4.09527	6.44448	3.91358	3.82976	4.69602	3.46927	3.6097	3.47795	3.99582	3.97432	3.86568
7933147	---	4.07122	4.12666	4.07646	4.5042	4.68959	4.26534	4.16616	3.77949	4.07776	4.52116	4.41277	4.73331
7921473	CFAP45	4.66081	6.47103	5.70571	6.5066	6.30101	5.03094	3.878	4.21188	4.24746	6.79289	6.53107	7.4425
8014316	CCL5	4.34889	4.75416	4.63159	5.54258	5.64638	4.73325	4.37672	4.64696	4.51859	4.93921	5.18533	5.01612
7953967	PRH2	2.2024	2.27584	2.36042	2.40216	2.37067	4.19112	2.18901	2.23448	2.58199	2.73732	2.66027	2.72074
7924144	RPL21	7.94116	7.91816	7.43276	7.47182	7.37267	5.57215	9.45083	9.64558	9.72555	7.33983	7.05793	7.28253
8054790	---	4.20872	4.13233	4.07279	4.51222	4.32185	6.12458	4.09803	4.22893	4.42409	4.99336	4.44343	4.57313
7953303	PLEKHG6	4.50467	4.56569	4.26727	4.93075	4.64562	4.70325	4.389	4.24139	4.22251	4.79654	5.02161	4.86213
8079869	RBM5	9.06754	9.03785	9.31293	9.61983	9.49815	5.2945	8.82979	8.7285	8.72633	9.37287	9.63652	9.87728
8117435	BTN3A2	5.24101	7.91388	7.54603	8.44076	8.95146	7.50076	7.67864	7.90416	8.47109	8.75015	9.01724	8.61256
8009227	PSMC5	7.2436	6.85518	6.44045	6.23566	6.57716	5.4946	7.98677	7.97773	8.00649	5.80805	6.1862	6.39795
8012285	KCNAB3	4.90793	4.67773	4.79274	4.55518	4.48102	4.51013	4.23523	4.29083	4.41619	4.5584	4.32765	4.2241
8121588	DSE	7.02961	8.54295	8.12027	6.46842	5.71229	4.56794	7.44257	7.48593	7.48156	6.44885	6.57336	7.12737
8063394	PTPN1	9.52611	8.21501	8.33965	7.65489	7.40731	6.01481	7.55919	7.51197	7.69081	7.84877	7.68999	7.66982
8113346	---	2.3243	2.1632	2.55674	2.43658	2.73932	4.57773	2.42187	2.84422	2.31137	3.00228	3.11558	2.73574
8026679	USE1	6.10774	6.23336	5.99401	6.29976	6.07186	5.91803	6.74353	6.76376	6.71358	5.84116	5.61891	5.66519
8030374	FCGRT	9.03486	9.50481	9.20722	9.84116	9.60909	6.70215	9.46114	9.60276	9.35904	9.69069	9.64381	10.044
8117321	TRIM38	7.067	7.75695	7.92097	8.20477	8.30401	4.99448	8.01384	8.14618	8.20524	8.02718	8.77907	8.31817
8137464	---	6.01001	5.99762	5.90698	5.99939	4.44886	3.98207	6.21992	4.77082	4.21532	5.00816	3.55058	3.79245
8034304	ACP5	3.98103	3.99816	3.94728	4.0956	4.48752	4.44283	4.51106	4.60205	5.24031	4.44878	4.71806	4.71255
8051589	ATL2	5.73456	5.43467	5.2348	5.28403	6.15891	4.38882	6.00774	5.55787	5.80022	4.52905	4.64312	4.90503
7973306	ABHD4	7.25599	7.52608	7.27897	8.02161	7.81841	4.27238	5.95032	6.77845	6.82184	8.09984	8.00956	8.083
8007992	KPNB1	7.66087	8.1588	8.71604	8.6486	8.68997	4.25906	7.47399	7.37487	7.25678	8.73473	9.34696	8.91125
8174648	CT83	3.29624	2.82182	3.14049	3.60012	3.5785	4.63975	3.11676	2.66609	3.17618	3.47599	3.68442	3.99227
7977803	RBM23	8.08334	8.51819	8.60003	8.9881	8.96177	6.86236	7.60202	7.63532	7.51898	8.77517	8.86168	9.08198
8146225	SMIM19	7.02072	6.31937	6.07314	5.56126	5.51242	5.15656	7.43092	7.32286	7.31829	5.94762	5.05767	5.75737
8045136	RAB6C	6.68947	6.07744	6.35686	5.69824	5.94752	5.74108	6.23954	6.09213	6.18846	5.89168	5.65235	5.93076
8078690	DLEC1	4.51563	4.36591	4.58929	4.95956	4.63739	4.97354	4.44856	4.22671	4.39225	5.02335	4.78176	5.51007
8119580	---	4.99648	4.86024	5.46604	5.68936	5.87505	4.65977	3.84066	4.16351	4.16235	5.52432	5.81275	5.74744
8087210	PRKAR2A	7.87673	6.26997	7.11029	6.30487	6.12946	6.06998	6.69766	6.52738	6.48206	6.09613	5.89544	6.12593
8109528	CYFIP2	7.98376	8.43683	8.43558	7.53514	7.30859	5.13926	6.06179	6.12401	6.22829	6.82548	7.62903	7.90908
8112337	SREK1IP1	3.18298	3.27257	4.09805	2.43413	2.69318	3.25277	3.42375	3.63673	3.64321	2.82489	2.81765	2.74383
8158544	NTMT1	5.42957	5.36915	5.35183	5.55015	5.84071	4.64494	7.07207	6.74827	6.68396	6.10137	5.84347	5.71617
8062409	CTNNBL1	5.90841	5.1111	4.9836	4.54347	4.71713	4.57634	6.46338	6.48383	6.68084	4.7339	4.44307	4.64068
8177269	ERVH-6	3.31275	3.05379	3.27129	3.54616	3.60886	4.21852	3.63549	3.54031	3.2238	3.72389	3.72548	3.56542
7988767	CYP19A1	5.67886	3.17638	5.18298	3.07969	3.13486	3.43094	2.62216	3.07475	2.85825	3.1704	2.92577	2.96142
7971184	MRPS31	6.58403	5.48739	6.26482	5.13387	5.45573	5.20234	6.4596	6.45565	6.39995	5.1076	5.18182	5.55918
8010918	VPS53	6.8191	7.29441	6.87521	6.72856	6.71037	5.26569	7.2006	7.00531	7.697	6.20511	6.36519	6.48952
7971615	EBPL	7.15303	7.29515	6.92401	6.23249	6.6503	5.98628	6.69871	6.424	6.8401	6.55759	6.26157	6.74036
8002533	ZNF23	2.78878	2.76728	2.78297	2.67595	2.77686	3.67544	3.14524	3.16768	3.03005	3.32112	3.03441	3.12244
7928318	MCU	7.88395	8.31171	8.25103	7.32278	7.41953	5.02431	6.9983	6.33316	6.85343	7.36483	7.08839	7.78873
7963880	ITGA7	5.33114	4.65168	7.20486	4.27269	4.25967	4.82776	4.0755	4.05517	3.86377	4.11896	4.10152	4.07627
8031617	ZNF444	5.27679	5.25353	5.58847	5.6528	5.67356	6.11353	5.39827	5.40795	5.49565	5.99761	5.84183	5.6345
7952200	CCDC153	6.11893	6.47145	6.85638	7.2209	7.6455	6.30886	6.08748	5.95802	6.45322	6.96735	7.27164	7.38472
7943288	SRSF8	3.49486	3.7652	3.4058	3.78683	3.77445	4.24043	3.92332	3.73871	3.7762	4.10455	4.09349	3.81987
7986068	BLM	4.02586	4.83983	4.12971	3.27545	3.5769	3.9879	4.07621	3.59365	4.49604	3.55071	3.5069	3.38472
7971208	KBTBD6	7.32141	5.85543	6.62012	4.982	4.70851	3.6545	5.24341	4.67132	5.06567	5.12609	5.04754	6.01346
8124897	PSORS1C3	3.5965	3.58606	4.13626	3.78002	3.4994	4.74524	3.74789	3.16299	3.03643	4.52176	4.68724	4.30412
8179727	PSORS1C3	3.5965	3.58606	4.13626	3.78002	3.4994	4.74524	3.74789	3.16299	3.03643	4.52176	4.68724	4.30412
8086698	CCDC12	6.7888	6.67564	6.99556	6.28048	6.01477	5.0925	7.23794	7.28673	7.29505	6.01975	6.41401	6.49707
8063115	MMP9	12.0481	10.3847	12.2328	9.99251	10.1569	6.65341	4.8017	4.49777	4.78248	10.1104	9.43203	10.6684
8086406	SEC22C	6.61922	5.4918	5.40979	4.43712	4.88091	5.15606	5.48215	5.6224	5.42681	4.50052	4.80976	5.18579
8032871	DPP9	6.56061	6.00873	6.04977	5.6934	5.53084	3.42027	6.75861	6.7514	6.42345	5.49009	5.51426	5.83325
8164129	---	6.00766	5.76046	5.57107	5.04176	5.01431	5.69199	5.08447	5.61229	5.83831	4.69387	5.42108	4.92958
7900051	AGO3	6.719	6.91562	6.31492	7.37165	7.67721	5.01043	7.18987	7.02819	7.29981	7.11583	7.21355	7.28055
8007483	TMEM106A	3.83189	5.29876	5.47214	6.14185	6.15282	5.31297	7.98693	8.14708	7.74965	5.91769	6.01402	6.15804
8038326	SLC6A16	5.79547	5.30194	5.58136	4.7931	5.20033	4.72162	3.99625	4.27466	4.39509	4.46064	5.26617	4.72298
8142464	---	4.20482	4.63627	4.4329	4.88694	4.55393	4.63663	4.03032	4.28341	4.0739	5.70655	5.30386	4.65799
8112174	---	4.53707	4.47558	4.61389	5.1457	5.46751	5.57402	4.42911	4.16778	4.61952	5.19818	5.13434	4.84848
7922250	SCYL3	4.9351	5.2908	5.6948	5.3658	5.75771	4.25749	4.69074	5.11318	4.63682	5.88755	6.01928	6.08375
7897482	PIK3CD	7.88189	7.83331	8.338	8.23014	8.36336	6.11988	6.53254	6.77674	6.86847	8.3188	8.77416	8.7511
8158057	---	4.15047	4.25786	4.66987	3.8575	4.00789	4.17903	3.72754	3.73294	4.1788	3.89218	3.38346	3.84332
7998978	ZNF597	5.14157	5.20177	5.10597	4.58684	4.50977	4.71672	4.67033	4.88617	4.83397	4.64456	4.38272	4.95195
8147156	WWP1	6.18517	6.17107	6.1282	5.55725	5.56011	5.0113	7.71357	7.58232	7.75868	5.31553	5.86252	5.8191
8144089	LMBR1	5.67743	5.01047	5.70462	4.86805	4.61034	4.79397	4.93934	4.89474	5.35121	4.70073	4.56413	4.99453
8118319	SNORD48	8.26674	8.00166	8.55308	9.05995	8.95366	5.3988	7.84732	7.4625	6.68829	8.93556	9.79451	9.10557
8131374	AIMP2	5.5932	5.50954	5.43708	5.33644	5.48537	4.52505	8.24012	8.03021	8.37458	5.04019	5.10912	5.16953
8012581	STX8	6.93305	5.55838	6.43	4.82215	5.17434	3.93482	7.05192	7.30305	7.22431	5.46198	5.31132	5.35052
8113342	---	2.07032	1.8518	2.02773	2.15831	1.98614	2.57958	1.83757	1.90804	2.07379	2.4481	2.44613	2.27367
8070102	GART	5.53515	4.94574	4.87252	4.80175	4.31335	3.80685	6.0652	5.86604	5.68267	4.50628	4.50975	4.35322
8009568	TTYH2	4.95066	4.8294	4.75603	5.34207	5.24448	4.4038	7.41061	7.42523	7.15655	5.16231	5.34767	5.23329
7899643	HCRTR1	5.00781	5.07461	4.83901	5.23357	5.2541	6.19526	4.94247	4.95058	4.84843	5.61111	5.27492	5.29459
7941621	DPP3	6.07698	5.19826	5.34651	5.3365	5.3402	4.21705	5.70194	5.94985	5.83859	4.77946	4.86273	4.9665
8170803	TMEM187	6.43983	5.72126	5.87607	5.39365	5.30575	5.57221	5.56439	5.63245	5.70264	5.51417	5.52457	5.16833
7978553	SPTSSA	4.56824	3.42523	5.35423	3.51001	3.005	3.53836	5.69859	5.55409	4.98598	3.42896	2.90307	2.91949
8134470	TRRAP	6.82188	6.52979	6.84032	6.51249	6.68193	4.87622	7.10652	6.77411	7.08729	5.95196	6.37499	6.29354
8115606	SLU7	7.53204	7.72004	7.72426	7.91485	8.15113	5.08634	7.24756	7.2225	7.31374	8.08	8.05344	7.97917
8131427	C7orf26	7.07039	7.43929	7.13251	7.39877	7.24188	6.89389	7.36542	7.50178	7.25458	6.67526	6.47984	6.94627
8049827	2018-09-02	6.18974	6.18248	6.5099	5.92533	6.12713	4.41182	6.79905	6.86973	6.63211	5.86388	5.74579	5.93725
8158725	ABL1	5.68318	5.33798	5.41889	4.86611	5.05843	5.3959	6.43068	6.16457	6.4057	5.04193	5.10796	4.95541
7944375	TRAPPC4	7.61839	7.89023	7.16916	6.99439	7.10778	4.48739	6.91262	6.97504	6.96046	6.90204	6.70217	7.20794
7985119	HMG20A	4.2099	4.21229	4.44931	3.80276	3.7781	4.05014	5.41296	5.33431	5.57476	3.95289	3.77332	3.93813
8066266	MAFB	6.3481	6.8625	6.18801	6.2419	5.55037	6.15551	8.14541	8.39537	7.87316	5.43987	5.58393	5.96177
7956200	MYL6B	5.85461	5.41679	5.50246	5.32496	5.38512	6.33152	5.1827	4.93436	5.2408	5.12656	5.06005	5.1806
7937802	CD81	4.32822	4.45711	4.36262	5.24511	4.52075	4.94527	7.33208	7.10067	6.99192	4.97158	4.89996	5.02789
8133038	---	3.37651	3.8237	5.07613	4.48233	5.08155	4.48317	3.13898	3.86491	2.912	5.34831	5.98629	5.14111
8121031	SLC35A1	6.90709	6.42633	5.7169	5.2366	5.21775	3.69238	7.55886	7.29771	7.28557	5.52452	4.85962	5.74756
8099246	GRPEL1	7.62372	7.63191	6.53022	6.63215	6.67039	4.7343	7.10265	7.33217	7.26099	6.41608	6.21462	6.57889
8158952	SNORD141A	10.8031	10.6027	10.1664	10.3717	10.4067	7.32095	12.47	12.4023	12.285	9.65674	10.0022	10.1384
7907773	TOR1AIP1	8.84121	8.47333	8.48659	8.20718	8.12668	5.84149	7.81987	7.77377	7.55604	8.03643	8.1607	8.24112
8096538	RAP1GDS1	5.40496	3.38509	4.84244	2.99825	3.0854	3.70043	5.66364	5.61121	4.82688	3.21623	3.15726	3.05108
8129458	ARHGAP18	6.80154	5.66926	6.09302	5.03975	5.19938	4.3186	6.00067	5.34844	6.2732	4.99739	4.90063	5.5587
8115158	RPS14	11.2211	11.1955	10.5351	10.6879	10.5292	9.48879	12.008	11.9724	11.8346	10.4652	10.2692	10.4412
8013641	PIGS	8.02873	7.73334	7.38443	7.23734	7.61462	5.3974	8.14672	7.84884	7.97618	7.15637	7.2504	6.90726
7901969	ROR1	3.56254	3.50553	3.54953	4.13221	3.75153	5.41892	3.58364	3.49003	3.48214	4.17603	3.94944	3.83165
8180402	---	8.85974	8.4589	8.15243	8.18393	8.40386	6.30632	9.5683	9.75062	9.68273	7.94474	7.84814	7.99721
8005638	ALDH3A2	4.89727	5.16794	4.86082	4.54738	4.18788	4.83308	5.86068	6.14152	5.71903	4.43656	4.2988	4.59896
8089314	IFT57	5.85954	5.22708	5.10766	4.55525	4.78785	4.46319	5.7977	6.1073	5.39971	4.48761	4.47213	4.8951
8122426	PHACTR2	6.59295	5.10965	6.31071	4.48856	4.67956	4.29712	5.72366	6.12881	5.92346	4.53872	4.4786	5.40829
8105987	LOC441081	9.80894	7.99855	9.50381	7.13559	6.76504	7.02232	8.17701	7.90312	8.49621	7.47656	8.15265	7.69192
8096032	PRDM8	5.57633	6.22059	5.97487	6.50842	6.38044	4.93073	5.4303	5.16372	5.11287	6.42526	6.54306	6.44695
8005814	NLK	7.33486	6.69506	7.35195	6.06383	6.22348	4.72741	6.65439	6.8768	6.53937	5.64247	6.08601	6.84957
7986411	MEF2A	8.87321	7.59066	9.17192	7.06216	6.24104	5.66265	7.6512	7.60441	8.05835	7.55574	7.05738	7.33699
8082846	EPHB1	4.69028	6.93878	5.77468	7.61437	7.18797	5.86036	4.24331	4.51638	4.34256	6.7272	7.92518	7.4892
8180206	---	5.71206	5.4339	5.24448	5.26976	5.2216	4.96944	6.47213	6.23283	6.64287	4.88056	4.69141	5.14616
8115584	CCNJL	7.08393	7.3899	7.91352	7.83934	7.59751	6.46964	4.97547	4.29254	4.37233	8.06067	8.35952	8.28753
8153411	ZC3H3	6.91212	6.02698	6.70774	5.79362	5.882	4.61815	5.19893	5.25808	5.23075	5.95717	5.81701	5.9435
8124901	HLA-F	12.1269	12.3953	12.4509	12.9238	12.9442	10.8317	12.0939	12.4043	12.238	12.7239	12.6718	12.9035
8031536	U2AF2	5.83678	6.27658	6.05117	6.40017	6.74703	4.80861	6.63942	6.70337	6.8444	6.41401	6.65143	6.58511
7990452	DNM1P34	5.4406	5.8208	5.61712	5.87664	5.89329	7.58903	5.67337	5.70622	5.59462	6.12122	5.96973	5.99855
7906348	CD1C	2.96534	2.86375	2.87431	3.6917	3.31918	3.75356	6.39461	6.16986	5.78541	3.19218	3.83601	4.49638
8137228	ZNF775	6.27907	6.4102	6.54848	6.68736	6.60058	5.54234	6.32496	6.59626	6.50465	6.89309	6.8182	6.73397
8139392	DDX56	6.42746	5.95052	5.50042	5.75703	6.03987	4.43917	7.25884	7.44766	7.28268	5.41972	5.01344	5.31123
7954279	AEBP2	7.1365	6.83348	7.43877	6.699	6.81434	5.7131	7.36715	7.29986	7.40218	6.60888	6.74289	6.56466
8159111	WDR5	4.53215	5.36001	5.29549	4.56155	4.63301	4.95242	6.50422	6.82174	6.68669	4.15332	4.43045	4.51613
8073015	KDELR3	2.56996	2.45832	2.54355	2.87502	2.64782	3.40365	2.51958	2.76515	2.73474	2.78581	2.98067	3.05217
8074991	GGT5	5.347	5.29991	5.20782	5.90323	6.03552	6.67129	5.22433	5.08668	5.169	5.74251	6.20178	5.51995
7938629	PDE3B	6.15087	6.04948	6.9941	7.04904	7.59983	5.01577	4.97927	5.38633	4.97935	7.34661	7.16045	7.15485
8108166	TXNDC15	6.21286	5.85232	5.85144	5.11986	5.40148	6.30188	6.78197	6.58148	6.685	5.51008	4.85218	5.58739
8150685	---	1.93458	2.20621	2.20588	3.15945	3.68481	3.58426	2.20883	2.31156	2.12832	6.1751	2.99246	3.46193
7958842	---	4.11627	4.14102	4.81145	4.17302	4.48351	5.57113	2.66595	2.79848	3.8001	5.91888	5.20586	5.15407
8072876	LGALS1	10.4275	7.97493	8.76802	6.77558	7.22311	6.27748	11.164	10.9886	11.1858	7.27637	7.19183	7.88392
7916836	SERBP1	5.85531	5.26408	5.58348	4.84788	4.88515	6.84109	7.18894	6.89812	6.98153	5.20662	4.89353	4.9925
7931754	IDI1	9.61178	8.04519	8.05684	7.14849	7.22887	5.71203	6.4809	6.42619	6.21771	7.44069	7.13175	7.645
7915775	IPP	4.98116	3.78374	4.69218	3.42705	4.13668	3.80241	3.30851	2.83431	2.98863	3.00649	3.31722	3.87888
8167951	---	1.95482	1.90753	2.19302	2.32209	2.24515	3.9828	2.15474	2.03529	2.18647	2.35479	2.48285	2.37142
7921319	FCRL1	5.41206	5.30955	5.66945	4.79639	4.77614	5.17038	4.51422	3.93296	4.34036	4.51284	5.08457	4.91862
8124194	---	4.0594	3.99868	4.09414	4.37649	4.2666	6.12545	4.04409	3.82911	3.90331	4.71908	4.36492	4.34946
7945641	DUSP8	4.93782	4.84511	4.66583	4.99448	5.08065	5.31024	4.96507	5.0942	4.70219	5.25806	5.40484	5.14607
7982829	SPINT1	5.54925	6.10745	5.87412	6.70758	7.31305	6.43432	6.80745	6.78015	6.73951	6.18214	6.6492	6.72999
8134351	PPP1R9A	2.6973	2.65678	2.82191	3.14853	3.07176	3.62796	2.68897	2.76932	2.80367	3.26112	2.91232	3.22158
7918759	BCAS2	6.95212	6.79765	6.20021	7.49337	7.67722	5.85883	7.01696	7.21935	7.20329	7.23152	7.28161	7.20714
8180202	---	5.23532	3.8539	3.97133	3.19738	3.66567	4.68989	4.89913	4.60658	4.72884	3.05444	3.44985	3.42517
8180258	---	5.23532	3.8539	3.97133	3.19738	3.66567	4.68989	4.89913	4.60658	4.72884	3.05444	3.44985	3.42517
8065569	BCL2L1	7.75117	7.17034	7.22122	6.35616	6.86472	5.67978	6.25053	6.41629	6.56295	6.41303	6.89818	6.80289
8028341	CATSPERG	3.93746	4.11923	4.13811	4.17738	4.08924	4.53003	4.05261	4.11606	4.21056	4.52594	4.4293	4.3479
8081810	GAP43	3.53854	3.59053	3.57506	3.87945	3.91223	3.76586	3.62669	3.50529	3.59893	3.83821	4.04476	3.86607
8091260	SLC9A9	6.87758	3.84769	5.35239	3.84086	3.77779	4.76738	7.24019	7.44592	7.27579	3.58572	3.20069	3.74511
8065082	---	3.33801	3.30039	3.20779	3.70432	3.85944	4.21852	3.64588	3.59713	3.5408	3.72662	3.50353	3.73469
7994362	SGF29	6.5621	6.5272	7.32771	5.69667	5.65077	5.48454	6.96049	7.02781	6.90372	5.39476	6.20892	6.26982
7929634	ZDHHC16	7.18097	6.49902	6.15003	5.74321	5.67649	5.43302	7.18771	7.79216	7.80991	5.48216	5.52826	6.10297
7945896	CHRNA10	4.47817	4.39482	5.02368	5.48147	5.1567	3.96259	4.12472	3.99858	4.31922	5.14763	5.27517	5.21537
8087874	WDR82	6.80158	6.13712	6.63324	7.35809	7.09585	4.92279	7.02328	7.54335	7.17214	7.33475	7.10717	7.06268
7902367	ACADM	6.56545	5.63318	6.15309	4.22933	5.34249	4.16655	6.43532	6.88203	7.05716	4.91452	5.11355	5.29236
8046461	ZAK	5.43752	5.15686	6.16686	3.85735	4.11449	4.77075	6.05827	6.07026	5.64562	4.40062	4.65276	5.10415
7927146	CSGALNACT2	9.48398	7.80643	9.46385	7.16401	7.63377	6.65647	7.60532	7.77145	7.41218	8.06772	6.66057	7.56823
7913824	RSRP1	9.16525	8.70718	8.62577	9.67356	9.47247	7.93934	9.1094	9.12446	9.22281	9.15105	9.39096	9.69856
8087374	USP4	6.19561	6.71667	7.55881	7.92113	7.46897	4.88947	5.97147	5.83494	5.80901	7.82851	7.47114	8.19028
7937940	OR52K3P	6.99681	7.85274	8.2463	9.01374	8.88834	8.45937	8.06133	7.56354	7.66374	8.12402	9.16582	9.20391
8180255	---	4.45286	4.50376	4.03325	4.49428	5.11674	4.41334	3.04067	4.3082	4.0451	5.10131	5.55256	5.35502
8180321	---	4.45286	4.50376	4.03325	4.49428	5.11674	4.41334	3.04067	4.3082	4.0451	5.10131	5.55256	5.35502
8078350	TGFBR2	9.49097	9.46005	9.58487	10.0952	10.0129	8.41962	8.52489	8.79461	8.32679	9.74596	10.1095	10.3836
8086028	GLB1	7.18196	6.96567	6.93444	6.49098	6.43402	4.45695	7.87498	7.92508	7.80221	6.64096	6.07726	6.72376
8034021	CDC37	8.39095	7.57546	7.5815	7.25806	7.33693	5.7843	7.93707	8.03972	8.18092	7.03352	7.30868	7.19452
8136495	TTC26	3.96215	3.708	4.08538	4.09974	4.31429	4.05273	3.6246	3.37565	3.49764	4.61623	7.19165	5.00766
7898448	PADI4	10.2319	9.80517	10.3391	9.3382	9.66548	6.0111	7.67954	7.91887	7.43947	9.68438	9.04202	9.56394
8060503	SNORD57	7.47926	7.20817	7.60923	8.29505	8.55278	4.87069	6.88561	6.95683	7.58948	8.39573	8.79821	7.74369
7942912	---	8.14732	7.47914	7.80885	7.42063	7.13968	7.58095	6.81804	6.6384	6.60917	6.43459	7.29128	7.30955
8160487	PLAA	6.28225	5.69464	5.6635	5.54299	5.85623	5.26278	5.73464	6.2936	5.85445	5.24923	5.15428	5.28552
8026926	MAST3	8.04183	8.34736	8.59952	8.78787	8.99026	6.93342	6.81267	7.04314	7.09091	8.83138	8.7087	9.10579
8108403	MATR3	6.08388	5.97827	5.60486	5.70547	5.48469	3.53287	6.64928	6.3551	6.55235	5.52916	5.05412	5.40179
8088047	TMEM110-MUSTN1	6.98736	5.80852	7.55687	4.95571	5.06284	3.4518	5.99745	5.89303	5.94647	5.62077	5.76735	5.6687
8087201	IP6K2	7.16877	7.22169	7.02066	7.33004	7.57783	4.5414	6.94326	6.99616	7.0076	7.44373	7.46888	7.71795
7906072	LAMTOR2	7.40569	7.08975	7.07724	6.35433	6.55766	5.67271	7.88091	7.52462	7.90345	6.6281	6.51997	6.87693
8118111	HCP5	5.83266	7.08492	7.54109	8.5085	8.35636	6.3259	6.98074	6.92851	6.99947	7.96298	7.7393	8.07455
8067221	ZBP1	6.50982	7.22727	7.33505	7.33686	7.86546	5.36475	5.07464	5.97085	5.53141	7.64904	8.33863	7.94666
8005574	---	3.87876	4.06244	3.69597	5.26827	5.37557	5.02869	3.85529	3.13415	3.95746	5.28691	4.58494	4.35734
8045349	MGAT5	5.9109	6.009	5.92105	6.06276	5.83449	5.46578	5.37693	5.05017	5.04903	5.61386	5.47159	5.50192
8169580	IL13RA1	7.6122	8.11744	8.5425	8.93916	8.26898	6.53086	7.79857	7.56344	7.62095	9.00199	8.80611	8.77025
8026250	DCAF15	6.47149	6.56643	6.01381	6.87046	7.02306	4.2748	6.14145	6.44459	6.45566	6.76958	6.85072	7.09206
8163275	KIAA0368	6.83524	6.02187	6.48571	5.28196	5.53057	5.03336	6.91915	6.62949	6.54931	5.29101	5.99481	5.77923
7946446	NRIP3	5.32185	5.03628	4.02768	4.50154	4.44471	4.42959	4.71886	5.16648	5.37333	3.38377	4.23276	3.52431
8167234	RBM3	7.08119	6.98044	6.73348	6.86472	6.69678	5.24641	8.42479	8.12892	7.8961	6.42049	6.40056	6.4801
8090511	KIAA1257	4.42849	5.68723	5.92523	6.32605	6.37762	5.05624	4.27416	4.12291	4.31978	6.1772	6.66899	6.32198
7994187	TNRC6A	5.71358	5.36944	5.58258	4.83125	5.29888	4.36406	6.27587	6.44153	6.23665	5.17851	4.6359	5.0908
8088384	PDHB	5.5199	5.14855	5.49546	4.65878	4.87844	4.58444	6.71035	6.93229	6.85953	4.78814	4.58237	5.14796
7935361	SLIT1	4.29824	4.1067	4.31578	4.34003	4.8933	3.97911	3.97953	4.18022	4.11413	4.61709	4.77842	4.82203
8017173	TBC1D3C	6.35091	6.69061	6.84814	6.77309	6.92658	6.77221	5.99697	5.8684	5.75999	7.03886	7.17246	7.07749
7927285	FAM35DP	6.64809	6.41084	6.31881	6.2899	6.14625	5.15339	6.93186	6.94179	6.80357	5.8647	6.04612	6.17951
7978449	HECTD1	5.9715	5.82177	6.08308	5.79846	5.42108	4.33042	6.62426	6.37929	6.43974	5.62498	5.14077	5.52521
8110392	TMED9	7.50779	7.36453	7.43403	6.68075	7.14067	6.33122	8.15066	8.50584	8.17517	7.08597	6.61305	6.94068
8138531	---	10.8328	10.6321	10.1942	10.4097	10.4572	7.34372	12.3312	12.3068	12.2854	9.72459	10.0627	10.1793
8165658	ND2	6.19723	6.18839	6.70677	5.60154	5.66374	4.04208	6.75886	6.75126	6.64813	5.17192	5.7596	6.05034
7944989	---	3.10118	3.27523	3.25246	3.52464	3.65895	3.22251	3.51872	3.23048	3.32665	3.90084	3.49044	3.595
7985259	ZFAND6	7.53125	7.21321	7.45789	7.52984	7.38099	3.60471	6.81189	6.8875	6.76445	7.88283	7.7216	7.7778
8044965	TSN	7.77659	7.15476	6.38149	6.38735	6.27822	4.45217	8.01048	7.96294	7.67197	6.13358	5.89243	6.42706
8103745	HAND2	3.25375	3.06865	3.11778	3.18201	3.11307	3.85021	3.21217	3.35794	2.97645	3.42141	3.64989	3.65538
7979085	PYGL	11.0601	10.65	11.3964	10.2556	10.1472	7.29376	8.81922	8.42365	8.53768	10.2802	10.323	10.6221
8025978	ZNF763	5.76601	5.36753	5.62021	5.41464	5.51279	4.13427	4.45288	4.2282	4.29244	5.95139	6.04735	6.00985
8165183	SEC16A	7.07576	6.57078	6.50367	6.36075	6.53571	5.02965	6.37638	6.3595	6.36594	6.20646	6.27556	6.19516
7997396	ATMIN	5.76585	5.33435	5.12368	4.91451	4.57661	4.77233	5.69499	5.57995	5.91629	4.79694	5.00624	4.53348
8031871	ZNF274	5.74835	5.98297	5.97344	6.46282	6.63945	5.76642	5.26426	5.31734	5.30251	6.09708	6.43585	6.4794
7989013	RSL24D1	6.75363	6.28881	5.99717	4.91999	5.01689	5.23014	6.77363	7.10686	6.74176	5.58215	4.91114	5.96692
8163807	PHF19	6.55427	6.20454	6.04699	5.73808	5.62641	6.15306	6.45803	6.75268	6.84912	5.81637	5.73696	5.75489
8004133	RPAIN	6.02674	6.10078	5.39059	5.20127	5.2039	5.08789	7.43978	7.00783	7.21023	5.28009	5.24139	5.17399
7999718	FOPNL	5.21385	4.99751	4.82667	4.80773	4.66583	4.96931	6.1509	6.02562	6.20715	4.3581	4.48454	4.77147
8069620	MRPL39	3.9228	4.20977	3.93252	3.92291	3.81318	4.28769	5.44909	5.68308	5.38376	3.66936	3.65611	3.22845
8040549	---	3.60659	3.84294	3.74392	4.02194	3.9873	4.25667	3.79458	3.87047	3.80968	4.16481	4.18209	3.95809
8151281	TRAM1	8.62353	8.12518	7.78829	7.70308	7.67316	5.18982	9.08744	9.20112	9.29462	7.56852	7.26417	7.74109
7919715	ANP32E	5.83298	6.1015	5.21812	5.28352	4.7897	4.4684	5.08453	5.07717	5.57611	4.63258	4.83845	5.20585
8114113	ZCCHC10	3.85172	3.71778	3.91031	3.18568	3.4864	3.35479	4.88812	3.98674	4.24029	2.69625	3.10626	3.37401
8112139	IL6ST	7.44062	6.40305	7.76727	5.63825	5.87069	3.59846	8.10121	8.22916	8.15309	5.28447	6.15759	6.60102
8128472	ASCC3	3.8803	3.47362	3.4391	3.15735	3.10919	3.53943	5.76954	5.47388	5.62284	3.1792	3.08083	3.15856
8062557	PPP1R16B	4.72154	4.96207	4.86349	5.1327	5.18243	5.70026	5.05593	4.97969	4.86114	5.17661	5.35478	5.15472
7945781	PHLDA2	5.7335	5.76297	5.63199	5.94292	6.03908	5.57733	5.7664	6.17153	5.94239	6.09633	6.14239	6.09192
8036867	C19orf47	5.66187	5.74973	5.95092	5.7021	5.6562	5.35883	6.03746	5.65111	5.82299	5.28232	5.39737	5.40457
8180350	---	6.83302	6.75387	6.88807	7.24836	7.21602	5.18672	6.43248	6.70512	6.66596	7.14938	7.55368	7.1348
8104998	WDR70	6.09918	4.58217	5.14804	4.32466	4.28538	4.53342	6.31264	6.33186	6.08112	4.12652	4.21852	4.52368
7968226	RPL21	8.52603	8.56964	8.02951	8.11288	7.98876	6.05672	10.0528	10.3288	10.4441	7.92893	7.60018	7.89839
8161839	NMRK1	5.96029	5.76762	5.9189	4.74499	4.18126	3.94563	4.14566	4.11315	3.86753	3.25035	5.01788	5.26582
8035829	RPL34P34	10.7264	10.9217	10.6959	10.8445	10.8249	9.43819	11.9162	11.8191	11.8035	10.5566	10.3018	10.345
8023261	ACAA2	5.86064	5.47286	4.99759	4.57115	4.82663	5.18249	6.39718	7.35528	6.68339	4.38807	4.72523	4.64298
8123230	LOC729603	7.19673	8.2148	8.31476	8.92096	8.89852	6.00007	6.27124	6.5474	5.88825	8.61152	9.02287	8.80153
8109773	WWC1	3.2551	3.85247	3.81106	3.8346	3.85237	4.47645	3.64998	3.61637	3.66448	4.29295	4.15744	4.02467
8113369	SLCO4C1	7.96479	7.11271	7.93718	6.87846	6.08621	4.99169	4.39463	3.7899	4.58739	6.44572	6.29053	7.11372
7969096	CDADC1	7.35109	6.2074	6.17389	6.02105	6.11242	5.16805	5.09744	5.46239	5.36352	5.92159	5.33317	5.68233
8046340	DYNC1I2	3.45503	2.7247	3.3414	2.98983	2.74364	2.92634	3.7763	3.7763	3.27311	2.44753	2.64052	2.40394
7978312	RIPK3	7.49635	7.198	7.47316	6.76479	7.00807	6.04124	5.86177	6.07053	6.22032	6.59879	7.08	6.91521
7904073	FAM19A3	4.01204	4.43444	4.37995	4.33607	4.48549	5.33098	4.27679	4.25063	4.1673	4.67641	4.76999	4.65851
8148149	ZHX2	7.10888	7.69843	7.43234	7.86422	8.27537	6.8977	6.13534	6.25882	6.01386	7.92279	7.84999	8.202
8164328	PIP5KL1	4.94219	5.15639	5.04711	5.24599	5.26902	6.04088	4.91204	4.99913	5.11652	5.58268	5.37788	5.3351
8140386	STYXL1	7.52804	7.08055	7.1505	7.10372	7.34504	4.86455	7.49543	8.0295	7.82756	7.99544	7.79497	7.6757
8168843	RPL36A	3.5556	3.7849	3.44283	3.28426	3.46978	4.33217	6.21044	6.07872	5.87883	3.00157	3.11872	3.28576
7933723	IPMK	8.22786	8.0884	8.43383	8.60538	8.76164	6.73345	7.42459	7.31904	7.16247	8.67087	8.54648	8.99377
7970842	---	7.6218	7.43674	7.59108	7.7839	7.71579	6.58002	7.21403	7.06244	6.87535	8.22341	8.13288	7.74413
7923850	SLC26A9	3.46023	3.49865	3.48917	3.84762	3.7672	3.68549	3.28638	3.14519	3.35328	4.34509	3.82126	3.77175
8002729	GLG1	8.06562	7.47037	7.71612	7.46276	7.60581	4.71305	8.24984	8.00551	8.19267	7.21141	7.12349	7.37535
7938687	NUCB2	8.11503	9.44088	7.95017	7.47206	7.00253	5.02865	6.9876	7.44442	7.61335	7.22339	7.05749	7.72184
8026047	JUNB	10.1232	10.6092	10.2304	11.3778	11.5819	8.52898	9.93391	10.1685	10.064	10.5057	11.3527	11.1924
8165309	EDF1	8.4702	8.17444	7.77711	7.645	7.79202	6.21606	9.31036	9.21682	9.36717	7.46006	7.459	7.80013
7940669	UQCC3	5.195	4.90182	5.30788	4.60996	4.83655	5.87782	5.214	5.46752	5.19725	4.66321	4.79375	4.53029
8180100	HLA-DPA1	4.20358	4.51774	4.59639	5.24154	4.64476	4.75266	10.8845	11.7555	11.8956	5.5842	5.17711	7.47698
8090507	---	4.67106	5.71344	5.10858	5.498	5.99762	3.7534	5.41921	5.54015	4.97423	5.95664	6.06228	5.92786
7903586	TMEM167B	9.34299	9.2477	8.9264	8.69752	8.93407	6.72456	8.38754	8.31496	8.53112	8.5179	8.82392	8.74941
8039905	TMEM167B	9.34299	9.2477	8.9264	8.69752	8.93407	6.72456	8.38754	8.31496	8.53112	8.5179	8.82392	8.74941
7951873	SIK3	6.70212	7.31203	7.39261	7.54673	7.84646	4.87342	7.51008	7.71995	7.4829	7.55676	7.85478	7.82655
8016787	---	7.61833	7.95873	7.22735	8.83707	8.90516	7.2095	7.88769	7.99192	8.21255	8.66636	8.29439	7.93887
8132270	NPSR1	3.8727	3.58294	3.62614	3.87183	3.79435	4.35129	3.82864	3.47072	3.44244	4.47541	4.01393	4.13911
7983763	MAPK6	4.78214	4.1403	4.05074	3.3836	3.99639	3.5233	5.30007	5.13989	4.23417	3.29025	3.48899	3.36975
8048195	RPL37A	6.931	6.8574	6.25972	6.17259	6.09573	5.48528	7.9867	8.14199	7.93633	6.13122	6.0091	6.2395
8005661	SPECC1	5.37075	6.34209	5.6377	6.62303	6.9258	5.5365	7.2225	7.24766	7.47179	6.18075	6.96625	6.71337
7933982	PBLD	3.6582	4.15466	4.12097	4.31564	4.36176	4.0977	3.96462	4.45252	4.1354	4.3306	4.83137	4.57677
8009561	RPL38	10.2779	10.3051	10.0366	10.0035	9.90634	8.532	11.7638	11.7635	11.6491	9.68875	9.72039	9.98588
8039909	CCNL2	6.24571	6.25539	6.38744	6.55389	6.76599	5.06433	6.67532	6.6997	6.98046	6.86908	6.5889	6.70723
7925550	ADSS	7.19055	7.05563	7.57145	7.11734	6.80706	3.88918	6.8054	6.8414	6.84098	6.45325	5.23693	6.86794
8110289	NSD1	7.21744	6.91404	7.22134	7.05722	7.00857	5.70536	6.78963	6.90421	7.1576	6.52315	6.71944	6.75687
7945786	NAP1L4	6.88929	6.52171	6.54387	6.5532	6.42535	6.0788	6.76008	6.63052	6.53305	6.07389	6.27251	6.294
7997731	FLJ30679	3.13189	3.04705	3.22223	3.26988	3.49573	4.11541	2.92741	3.01946	3.16914	3.69829	3.43975	3.48319
8032371	ABHD17A	6.1568	6.35366	6.10135	6.53277	6.67858	6.6354	6.37854	6.55609	6.10017	6.60148	6.63399	6.71062
7903183	---	5.15436	5.20462	4.9009	4.81759	4.97124	3.93615	7.14517	7.15294	6.7731	4.37801	4.74998	4.63998
8109995	LOC100288254	1.77574	1.89483	1.76098	2.35463	2.80734	3.05399	1.8551	1.96881	2.11045	2.29571	2.22311	2.22776
8045604	MBD5	6.68236	6.68673	6.11188	6.28002	6.07146	4.75545	5.87754	5.68898	5.82729	6.09722	5.93088	5.84441
8139947	NSUN5P1	6.38122	6.81122	6.54626	6.266	6.24421	5.24393	6.7025	6.49657	6.6322	5.95396	5.95041	6.35659
8007561	G6PC3	5.30751	5.91015	5.29408	4.67113	4.92766	5.5518	7.34607	7.62228	7.66793	4.99609	4.99047	4.77246
7941563	---	5.73282	6.57652	5.62359	7.35493	7.60653	5.7283	5.90647	5.31048	5.66669	7.44208	6.77257	6.54212
8179926	DXO	7.40622	7.745	6.45185	8.326	8.66638	5.84392	7.10783	7.41785	7.04753	7.95378	8.19464	8.14339
8110930	---	3.71999	3.38315	3.50141	3.78761	3.53093	4.61879	3.50995	3.71293	3.73243	4.30391	4.04512	3.78944
8105612	CWC27	5.25175	5.17923	4.71731	4.00275	4.46521	4.04368	6.22239	6.58278	6.84823	4.40666	4.5026	4.29215
8042219	---	5.97473	7.066	6.31974	5.34248	5.77488	3.45836	5.17862	4.75813	4.15119	5.77488	5.11445	5.36808
8165858	---	2.83672	2.93406	3.3824	3.74768	3.65926	3.25247	3.12734	3.09202	2.97236	3.41019	3.99056	3.51185
8065372	NAPB	6.44022	5.42499	5.03404	5.06283	4.68429	3.76373	5.22245	5.52894	5.57023	4.71385	4.43681	4.83549
8167897	RRAGB	5.7639	4.82273	5.11155	4.05706	4.46331	4.24315	4.76622	5.30044	5.17512	4.5526	4.20243	4.58314
8131326	SLC29A4	5.17338	4.9364	5.10012	5.23154	5.24921	5.89706	4.20051	4.45969	4.37728	5.67005	5.69288	5.24855
8133788	PTPN12	7.79156	7.80329	7.66523	8.00813	7.96521	6.304	7.26905	6.89417	7.00701	8.36356	8.05224	8.13255
8111387	ADAMTS12	3.22997	3.16436	3.32726	3.30305	3.55781	4.41889	3.54136	3.56731	3.38234	3.82225	3.54691	3.57609
8065668	CDK5RAP1	6.08777	5.92393	5.57493	5.85674	5.55339	6.58012	7.57743	7.76236	7.62788	5.4298	5.20699	5.45005
7936100	CALHM2	5.72929	5.63882	5.58625	6.04694	5.93608	6.60106	7.8145	7.77567	7.75631	6.08796	5.83208	6.32818
7918517	WDR77	5.67581	5.72302	5.05191	5.01483	5.38806	5.0061	6.63033	7.09122	6.94943	4.84847	4.66364	4.97134
7978760	KLHL28	7.42193	7.8112	7.35595	7.27539	7.60524	5.45019	6.6581	6.85601	6.87408	6.55151	7.12775	7.09461
8043666	CNNM3	4.75221	4.99126	5.18146	5.48755	5.97741	4.7961	5.04951	4.99765	4.96487	5.31017	5.74264	5.508
8175492	ATP11C	6.15288	5.71203	6.01477	5.26989	5.06994	4.08463	5.45861	5.78788	5.55363	5.37331	5.15165	5.69031
8038109	FAM83E	5.58615	5.65165	5.35058	5.60261	5.81771	5.57171	5.70004	5.75151	5.58359	6.06618	6.05785	5.76737
8004867	NDEL1	8.85252	8.88779	9.59662	9.6506	9.8505	7.74174	7.57727	8.31438	8.08756	9.71044	9.99326	9.86527
7940717	SLC3A2	6.73187	6.40284	5.89492	6.10048	6.23754	4.94429	7.39635	7.6532	7.863	5.6767	5.49848	5.84968
8126860	MUT	5.88739	5.45231	5.88043	4.93156	5.18827	4.57245	5.75363	5.34718	5.8053	5.16269	5.24476	5.22089
8007355	VPS25	7.9841	6.95676	7.42632	6.47349	6.62634	4.96548	7.69254	7.67111	7.65365	6.92888	5.88795	6.76281
7948718	EML3	7.60357	7.27458	7.49458	7.30018	7.25622	5.96673	7.64443	7.4747	7.48629	6.88483	6.89499	7.25283
8135181	LRWD1	6.48188	7.37931	7.05422	7.39819	7.66445	7.18482	5.63044	5.75317	5.81747	7.7203	7.8275	7.40804
8150352	C8orf86	3.68219	3.63949	3.50053	4.11752	3.74984	5.19282	3.34248	3.44714	3.33641	4.02528	4.13626	3.90282
7918300	PSRC1	4.96648	5.19319	5.04675	5.28087	5.36185	4.92768	5.31072	5.06097	5.50701	5.35487	5.75004	5.53675
7975412	TTC9	6.13382	5.71921	6.55843	7.05744	7.53586	6.29864	6.23253	5.93713	6.09324	6.8321	6.61053	7.51143
8169000	---	2.75855	3.10931	2.71736	2.09692	2.36962	3.97716	2.51521	2.51387	2.63655	2.4113	2.18785	2.55256
8027778	FXYD5	7.40653	7.53485	6.99629	6.66146	6.85634	6.07003	8.30421	8.43447	8.84534	6.22197	6.70057	6.92767
8167457	CCDC22	5.61461	5.46011	5.51734	5.14265	5.0865	4.38834	5.30076	5.75465	5.7106	5.12658	5.00801	5.14768
7912672	FLJ37453	3.58279	3.9959	3.47165	4.41983	4.97878	3.99372	3.82155	3.93614	4.0998	4.31342	4.10786	4.40728
7975815	TTLL5	5.65936	5.98655	5.4883	5.90541	5.9654	4.18166	6.1655	6.46663	6.67124	6.09879	6.30968	6.32083
8099926	PDS5A	6.74771	6.24811	6.14937	6.12269	5.48104	3.99091	7.35997	7.33747	7.32072	5.86294	5.32798	5.86004
7906728	TOMM40L	5.42603	5.82754	5.28909	5.1188	4.9559	4.99656	5.28396	4.99854	5.37555	4.87007	5.09903	5.01042
8032509	GNG7	6.9835	8.17665	7.24828	8.55487	7.69385	6.31518	6.91334	6.64554	6.9999	8.01877	8.68483	9.18329
7958015	---	4.86232	4.04885	6.35863	3.51133	3.45884	3.28887	3.66143	2.94796	3.55662	3.45266	3.51889	3.88626
8170644	ZFP92	3.61868	3.90176	3.51704	3.60647	3.84504	5.23125	3.3981	3.71	4.12522	4.39879	4.05203	4.5157
8084173	ATP11B	10.2077	8.73086	9.52252	8.44625	8.19905	5.76989	7.24145	7.23475	6.96176	8.54951	8.17577	8.76739
8145244	TNFRSF10C	9.91906	10.112	10.2734	10.4046	10.7062	7.94412	6.10486	6.3486	6.28753	10.3084	10.8476	10.7847
8171013	VBP1	5.79856	5.48377	6.07617	4.71967	4.80528	3.83339	5.32851	4.82962	5.29597	4.84004	5.223	5.37366
7942381	ATG16L2	8.19894	9.38311	9.35638	9.92445	9.85489	7.49433	7.98085	8.04522	8.10789	9.72791	9.81514	9.92272
8130071	KATNBL1	5.23143	6.15746	5.81595	6.57322	5.89275	3.82982	5.10247	5.20561	4.93744	6.50461	6.31542	6.72852
7977749	METTL3	6.45251	6.20085	5.72993	5.23667	4.96	4.71669	7.2803	7.05999	7.40453	5.44739	5.15241	5.76182
8061416	CST7	10.9891	9.40524	10.1313	7.95132	7.72249	6.89635	5.40737	6.2628	5.14113	8.78801	8.07539	9.43383
8101657	---	5.37907	5.63039	5.57457	5.9894	5.9178	6.65336	5.53275	5.3614	5.39465	5.97883	6.00284	5.76218
7961120	CLEC7A	6.03137	7.59554	7.20385	8.20076	8.34469	6.55526	7.52803	7.57999	7.26404	7.8019	8.38635	7.84648
8039236	LILRA5	8.91737	9.02304	9.33343	6.35508	6.85917	4.4612	6.98227	7.66732	7.12305	6.81712	8.2918	8.49055
7918050	RPSAP19	7.96343	8.86092	7.43187	7.5481	7.31782	5.43389	10.4662	10.4482	10.4727	6.75483	6.80888	7.58477
7978174	CHMP4A	7.30679	7.22489	7.40536	7.067	7.05262	6.06104	8.1033	7.79975	7.85152	6.76218	7.03036	6.94216
8082583	---	3.21661	3.48102	2.5016	4.07033	3.70829	3.064	3.66149	3.59804	3.39366	3.80244	3.93516	3.63398
7914592	TMEM54	4.40738	5.0428	5.03677	5.10713	4.9945	5.0789	4.64612	4.43272	4.72821	5.47369	5.30629	5.37402
8020898	ZNF271P	6.03411	5.75851	5.66629	5.14216	5.53174	4.17739	5.85372	6.29651	5.79467	5.16671	5.43541	5.16482
7982889	NUSAP1	4.38191	5.27835	4.68754	4.59687	3.95386	3.77815	4.52531	4.73593	4.3576	4.04534	4.03562	4.05517
7938368	---	7.09263	7.08935	7.0427	6.8293	6.95146	5.52658	8.33686	8.79908	8.35208	6.64364	6.44898	6.74032
8113660	---	8.22334	8.11197	7.96521	8.21441	8.05921	7.9992	9.77152	10.1817	9.89505	7.42183	7.67867	7.78307
8150906	IMPAD1	4.65046	3.57742	3.6776	2.80272	2.85534	3.64782	5.73431	5.66307	6.28415	3.32623	2.53922	3.15757
7953211	TIGAR	4.95869	4.49352	5.11871	4.83297	4.41108	4.80515	5.4624	5.35508	5.69698	4.61921	3.78862	3.26338
7982287	ARHGAP11B	4.62252	4.72269	4.43552	4.33961	4.77498	4.77202	4.97185	4.92113	5.01178	4.23029	4.19906	3.64692
8087453	AMIGO3	4.47321	5.12237	5.03005	5.8011	5.65529	4.71104	4.92966	4.84194	4.81823	5.56772	5.52856	5.20783
8128650	SEC63	7.75719	8.04555	7.69295	7.60484	7.37633	5.26843	8.3879	8.1772	8.05219	7.42334	6.75488	7.44305
8008646	SCPEP1	9.43975	7.05386	7.62096	5.91195	6.30437	5.06473	8.5539	8.47226	8.68329	5.94438	6.76809	6.7067
8085954	AZI2	7.3513	5.36065	7.71524	4.73099	5.19052	3.76222	6.80306	6.91146	6.45432	5.09887	5.35447	5.37486
8080645	APPL1	7.49339	7.2229	6.2385	6.08765	5.734	3.72652	7.90719	7.75399	7.75358	5.51788	6.00417	6.44991
8035880	UQCRFS1	6.10655	6.27536	6.30466	4.72409	5.25574	5.97813	6.68102	6.66312	7.10325	5.3775	5.33912	5.97525
8116400	---	4.61907	4.99664	4.72518	4.27323	4.28842	5.43995	4.41872	4.53417	4.552	4.48463	4.37245	4.28842
7970727	CDX2	5.6444	5.80036	5.77785	5.86837	5.91817	6.50572	5.56617	5.38545	5.64644	6.5068	5.99014	6.12227
8117237	---	7.63321	7.93433	8.37276	8.48522	8.91074	5.56201	7.21764	7.43189	7.3982	8.2817	8.8697	8.94303
8072454	RNF185	5.76097	5.79013	5.85984	6.23445	6.18626	5.29137	5.25452	5.60804	5.76597	5.97208	6.62733	6.64677
8169750	STAG2	7.19171	7.22121	7.53304	7.57205	7.67706	4.22817	6.62289	6.68797	6.59601	7.58995	7.72769	7.84145
7995580	---	6.85165	6.5679	6.44844	6.20557	6.45493	5.17428	5.92064	6.14398	6.00806	6.08652	6.20371	6.2614
7964089	PAN2	5.28328	5.15318	5.11931	4.78078	4.39973	4.62124	6.79201	6.16924	6.53648	4.73558	4.69782	4.48856
8076415	SNORD13P1	2.29136	3.70109	2.15885	6.7251	7.12444	5.16499	4.82981	4.80476	3.88485	4.13082	3.95086	3.75389
8092348	LAMP3	4.15702	4.89173	4.21912	4.69622	5.21912	5.61525	3.80078	3.84322	4.23256	4.92449	5.68511	5.11305
7984103	LACTB	7.37258	7.25589	7.30888	6.88202	6.49162	6.17033	7.44823	7.36203	7.46158	7.07526	6.60573	6.85301
7988327	PATL2	4.91784	6.12736	6.07115	6.45512	6.75284	5.61786	5.0526	4.26213	4.98581	6.80879	6.92399	6.45352
7921462	VSIG8	4.64768	4.78987	4.47329	5.16736	4.75255	5.0349	4.50227	4.60812	4.83318	5.07654	5.00475	5.36486
7974481	---	7.55898	7.36717	7.42444	7.20243	7.06885	6.4654	7.44965	7.11784	7.2413	6.96192	7.22167	6.86342
8156718	NCBP1	6.47666	6.4828	5.70753	6.00434	6.16573	4.46976	7.53477	7.55543	7.62141	5.6918	5.55472	5.61141
7973298	TRAV8-3	3.10663	2.84622	2.91399	3.24797	3.43334	3.71576	2.97813	3.04861	2.91885	3.25203	3.55426	3.28189
8132743	ABCA13	5.55624	8.41686	7.33008	5.44139	4.75276	3.70393	3.31845	3.69943	3.69715	5.30005	4.71313	5.7863
8145942	LETM2	5.17249	5.76607	6.38278	6.43157	7.24817	4.47359	5.485	5.38498	5.5707	6.66168	6.47906	6.98012
8132849	---	4.27343	4.48916	4.32224	5.29131	4.57137	4.91256	4.32654	4.20195	4.53587	5.31823	5.04178	4.69989
7898750	ZBTB40	4.55479	4.16145	4.4364	3.9953	3.72132	3.31469	6.19171	5.27261	5.96999	3.57572	3.89717	3.5273
7923547	CHI3L1	5.68036	8.91828	8.57866	10.7064	10.4894	5.58487	4.61001	5.07443	4.57866	9.6577	10.5073	9.49205
7923917	FCMR	5.2724	4.95016	6.10586	7.57183	7.88481	7.08478	4.27391	4.11713	4.76589	7.35843	6.94981	5.78964
8056860	WIPF1	9.92768	10.4722	10.6567	10.7981	10.884	8.80176	9.46309	9.57509	9.59528	10.7098	11.0365	11.0287
8023175	IER3IP1	4.69935	5.36078	4.67419	3.95157	3.44787	4.36444	5.38849	6.8818	6.04602	3.8294	3.46096	4.12066
8060353	RBCK1	8.12417	8.71888	8.54439	8.62683	8.83604	5.20573	7.79082	7.70456	7.78433	8.74367	9.322	9.05613
7993195	CIITA	4.91003	4.67964	4.69255	5.06226	5.1722	4.43803	5.60029	6.0047	5.76803	5.11076	5.45706	5.11636
7948470	PTGDR2	5.51124	5.34949	5.33663	5.56112	5.81529	5.34059	5.37771	5.29195	5.34551	5.90285	5.77977	5.65478
7940171	OR5AN1	2.98342	2.82972	3.20983	3.36845	3.97281	3.61764	2.86562	2.89105	3.16656	3.92432	3.32829	3.67799
7934393	PPP3CB	7.08356	6.23066	6.67176	6.22523	5.84412	5.34209	7.06836	6.67199	6.96054	5.92234	5.82956	6.18462
7981273	CCDC85C	4.80261	4.79025	4.74716	5.2198	5.30278	4.97465	4.62276	5.00178	4.36862	5.24339	5.30417	5.21671
7983054	CAPN3	6.05866	5.73475	6.32719	5.44643	5.0911	4.15865	6.57643	6.44336	6.7845	5.21098	5.76353	5.2355
8113467	---	4.95832	4.6827	4.43842	5.07231	5.24143	6.17501	5.01216	4.94517	5.11939	5.21757	5.17971	5.04343
8009533	COG1	5.99295	5.96502	5.74885	6.08594	6.19723	5.10666	5.76494	5.75557	5.85502	5.63909	5.54685	5.41104
8149820	NKX2-6	5.46865	5.56255	5.36127	5.87659	5.68342	7.20925	5.21841	4.93116	5.27449	5.8827	5.81179	5.8998
7899417	XKR8	6.62417	6.84726	6.6194	7.22988	7.06969	6.75221	5.79941	6.00682	6.30016	7.10427	7.08326	7.31483
8150866	---	4.57405	4.49796	4.73623	4.55946	4.76449	6.66082	4.03694	3.7476	4.1741	5.05335	5.06821	4.97841
8146142	GPAT4	7.03887	6.32111	5.6161	4.76805	5.61667	4.60919	5.94978	6.0869	5.74075	5.51015	4.67705	5.40606
8000799	GDPD3	6.9166	7.22028	7.61596	7.5091	8.15953	5.85644	5.88903	6.18285	6.11148	7.62209	8.19061	8.14488
8011759	PFN1	10.0382	9.88718	9.83748	9.7405	9.77353	8.53484	9.60981	9.80348	9.62257	9.34995	9.50004	9.71068
7936567	RAB11FIP2	7.20407	7.28425	6.51566	6.76084	6.47369	5.19035	7.04536	6.88106	7.15962	6.33936	5.82291	6.58846
8112327	---	5.71228	7.04461	5.95676	5.81091	5.94283	6.1239	7.12638	7.38612	7.25738	5.41971	5.13143	5.47436
8034420	MAN2B1	7.46094	7.98348	7.09467	7.23408	7.12709	5.2215	8.39274	8.60387	8.78219	6.27368	7.00269	6.93263
8121009	C6orf163	3.23826	3.51362	3.28676	3.53401	3.4261	4.04376	3.157	3.28794	2.65937	4.37051	3.55969	5.00555
8096718	AIMP1	4.49906	4.0996	4.02628	3.8763	3.57232	4.3947	5.73518	6.15677	5.57527	3.63114	3.60729	3.69216
7904693	---	4.23498	5.34653	5.73393	5.56767	5.80204	5.43481	4.51096	4.67435	5.14896	6.87302	5.84699	6.11902
8019559	B3GNTL1	5.68871	5.68252	5.55656	5.45613	6.12481	5.28745	4.77478	5.0067	4.19815	6.23878	6.34744	6.39333
8002121	CTRL	5.96728	6.76678	6.51569	6.75231	6.88158	6.17098	5.73728	5.82457	5.83109	6.76797	7.24029	7.10648
7976189	PSMC1	8.32124	7.85407	7.76265	7.58439	7.59876	6.40622	7.66871	7.66452	7.65419	7.35619	7.64244	7.502
7923503	ADIPOR1	10.8936	10.6855	10.7114	10.3839	10.1623	7.75859	9.44482	9.79728	9.55512	10.3981	10.2276	10.4083
7914550	ZBTB8OS	5.59819	4.83787	5.09775	4.81564	4.44049	4.83865	4.89412	4.71294	4.69339	4.79143	4.37303	4.47005
8113071	LOC729040	5.89052	6.22983	6.15909	6.98234	6.81174	4.91692	5.38544	5.14486	5.43866	6.45032	6.85914	6.44569
8075009	GUCD1	8.54602	8.48982	8.48957	8.12933	8.33876	6.12725	8.10924	8.13735	8.15096	7.84249	8.11781	8.31
7945014	CHEK1	3.98895	5.38232	4.51564	3.82394	3.31401	3.96547	3.64613	3.72495	3.65629	3.88334	3.6398	3.62824
7975068	ZBTB1	5.96858	5.90125	5.50693	5.48127	5.86269	4.49503	5.91297	6.19447	6.16546	5.35155	5.32	5.19422
8104838	DNAJC21	5.45744	5.49335	4.82952	5.31935	5.50392	4.11682	6.4007	6.42351	6.12481	4.72508	4.81198	4.44586
8045514	SPOPL	7.60035	7.84995	8.09886	8.37956	8.40416	5.7304	7.33978	7.41694	7.27736	8.2809	8.15448	8.49462
8050443	SMC6	5.27285	5.01855	4.98053	4.13633	4.46969	4.24968	5.22248	4.99802	5.06632	4.66909	4.6226	4.72109
8078905	RPSA	8.21811	9.1701	7.65039	7.77302	7.64811	5.55993	10.7765	10.7419	10.8169	7.00175	7.06145	7.81659
7929032	FAS	7.24052	8.63732	7.87578	8.39448	8.23574	6.77591	6.45941	6.53233	6.37468	8.80461	8.86756	8.6639
7912724	ARHGEF19	5.44737	5.47342	5.36231	5.4324	5.43377	5.43121	4.9647	5.17972	5.01181	5.8559	5.69838	5.75597
8080923	PSMC1	8.52362	8.07345	7.97537	7.83545	7.81098	6.53652	7.88997	7.88086	7.85081	7.57377	7.84259	7.74411
7899604	ZCCHC17	6.96881	6.31898	6.18528	5.49917	6.00028	6.04894	6.15622	6.75427	6.81919	5.77949	5.85712	5.50228
8079772	APEH	6.5217	6.32761	6.28237	6.07582	5.84955	5.3365	6.95969	6.9431	6.55164	5.81106	5.91486	6.03468
8062981	PIGT	7.41079	7.56989	6.84316	6.95125	6.9335	5.92695	7.55593	7.63605	7.39753	6.8072	6.43725	6.80479
8172399	SSX9	2.10939	2.33051	2.44516	2.33315	2.29672	3.00197	2.55843	2.5986	2.60434	3.21599	2.54557	2.71359
7905503	LCE2C	3.07045	3.14549	3.48474	3.80166	4.10017	2.86159	2.88811	2.94467	2.97916	3.80858	4.161	3.46589
7995382	PHKB	7.14685	6.86002	7.05573	6.32873	6.80907	4.2687	7.73524	7.84139	7.67015	6.3156	6.27475	6.8052
7922406	GAS5	3.3047	3.3496	3.71571	3.82741	4.93341	3.85739	3.49036	3.67585	3.45058	4.18707	4.4203	4.08093
8043187	MAT2A	7.2782	6.94857	7.00501	7.11952	6.4467	5.19235	8.70226	8.47582	8.19355	6.36296	6.0155	6.71459
8130374	FBXO5	3.40559	4.46959	3.10012	3.17201	2.67278	3.01089	3.47731	3.57287	3.18759	2.54481	2.83648	2.74638
7911799	MEGF6	5.37977	5.89062	5.75334	5.89514	6.08391	5.83456	5.30803	5.34513	5.51759	6.22766	6.06111	6.11908
7981157	LINC00341	5.71012	5.3595	5.99626	5.05978	5.13538	4.73069	6.71637	5.56363	5.99307	4.73317	4.84608	5.02156
7953200	CCND2	6.49023	7.37121	7.09582	6.42211	6.64647	6.20865	6.87739	6.37123	6.78664	6.38252	6.10195	6.38054
8180298	---	8.94134	8.91345	8.43212	8.77714	8.88377	6.80776	8.98128	9.10121	8.96151	8.20028	8.32332	8.37822
8120698	MTO1	4.46599	3.61407	4.71387	3.43654	3.62731	3.84175	5.89709	5.6504	5.82365	3.65424	3.38384	3.50205
7942647	LOC100506127	4.0468	3.97695	4.23088	4.52446	4.58119	3.44476	4.53325	4.37892	4.62302	4.41135	4.38182	4.66241
8172460	SLC35A2	5.6987	5.69526	5.3795	6.1989	6.48891	5.78295	5.37278	5.27153	5.36522	6.05139	5.89827	6.06951
8058182	FAM126B	7.99179	7.32549	8.248	8.336	8.06956	4.37932	5.41774	5.2508	5.65141	8.35529	8.51704	9.12547
8123989	RANBP9	9.13872	8.51004	9.18659	8.17516	8.17113	5.49356	7.44855	8.03867	7.54891	8.38364	8.2657	8.29029
8120222	EFHC1	3.22237	4.22091	3.61303	4.95017	4.43552	4.6545	4.9575	4.52918	4.8596	4.49148	4.4659	6.31086
7956785	XPOT	5.76536	5.25645	5.35128	4.57257	4.63968	3.52253	6.02891	5.59366	5.72033	5.05725	4.42373	4.99566
8049965	FAM110C	5.14867	5.12906	5.22151	5.15187	5.36513	6.87257	5.24106	5.02389	5.14889	5.7075	5.5857	5.38383
8133582	SPDYE1	4.60591	4.60674	4.4988	4.76673	5.02663	5.15844	4.21605	4.45412	4.37231	4.96563	4.91904	4.92283
8129924	TXLNB	3.73431	3.77833	3.56909	4.05959	3.89428	3.60568	3.80411	3.38186	3.47497	4.28869	4.07966	4.04271
8099860	RFC1	5.37009	4.75833	4.5283	4.40043	4.57591	3.28435	5.52211	5.69074	5.80029	4.20166	4.16843	4.42331
8026155	NACC1	7.24058	7.1057	7.23222	6.91172	6.92183	6.11175	6.76735	6.76132	6.91771	6.32801	6.86388	6.91844
7936011	CUEDC2	6.65349	6.37439	6.29754	6.16539	5.92915	5.10582	7.04664	6.94056	6.8534	6.1644	5.77926	6.01014
8179235	HCG27	7.25882	6.85097	6.00679	6.78402	7.02148	4.12522	5.11822	4.58996	5.091	7.66469	7.51064	7.52433
8180207	---	5.99348	5.59807	5.42294	5.5277	5.12385	4.39915	7.13028	6.62609	7.1091	4.98203	4.85424	5.26657
8140828	SRI	9.36161	8.39515	8.80931	8.10989	7.56214	5.00864	8.66912	8.81923	8.58873	7.42093	7.86513	8.49347
8021756	ZNF407	5.54852	5.61254	5.68218	4.9005	5.38257	4.31447	5.12197	5.17436	5.27048	5.1207	5.29482	5.13505
8001387	SALL1	4.69846	4.35623	4.35599	4.78698	4.84102	5.12702	4.67405	4.43736	4.51077	4.8583	5.23557	4.76768
7898875	RPL11	9.02136	9.02218	8.66595	8.58436	8.43375	6.36033	10.4094	10.8513	10.876	8.07999	8.41593	8.54809
8020630	TTC39C	4.9406	5.58433	4.87855	4.54885	5.181	4.97276	8.22403	7.13349	8.07105	4.20391	4.15471	4.27892
7965436	EEA1	4.99594	4.6007	4.55385	3.51162	3.61007	4.07118	5.70448	5.8532	5.83659	4.35567	4.26516	4.26871
8171006	BRCC3	5.18274	4.92796	5.2273	4.73603	4.34264	4.57348	4.9112	5.50943	5.60526	4.34264	4.75908	4.24123
8071289	COMT	6.60795	6.19865	5.9845	5.81223	5.94021	5.75896	8.04981	7.83526	7.92533	5.55991	5.96063	5.65883
7967039	MSI1	5.75151	5.66461	5.56903	5.89992	5.69459	5.8045	5.3438	5.46637	5.32062	6.14709	5.93442	6.00159
8032197	CBARP	5.56154	5.83308	5.91134	6.1777	5.86268	5.44085	5.47374	5.56806	5.67881	6.11439	6.2717	6.20083
7964870	---	3.05219	2.71006	2.6957	2.86994	2.73861	4.36586	2.8948	2.89005	3.02939	3.14964	3.17057	3.39239
8053737	ANKRD20A8P	1.96939	1.96395	1.96597	2.20287	2.04527	3.83568	2.12655	2.05298	1.96796	2.26524	2.28163	2.32168
8004671	KDM6B	7.95885	8.57056	8.47074	8.95696	8.96076	7.87051	7.21218	7.1807	7.33657	8.61422	9.00544	9.01694
7903404	RNPC3	8.47805	8.62351	8.2645	8.61444	8.82026	5.61169	8.0596	8.01694	8.34028	8.70035	9.11894	9.01845
8090872	KY	3.57037	3.73722	4.0922	4.64722	4.40178	3.86268	3.51507	3.9184	3.46889	4.21417	4.29649	4.58944
8152976	TMEM71	9.12991	9.02512	9.32105	9.6589	9.76831	6.22914	7.79053	8.37691	7.23558	9.71223	9.96222	10.0657
8051012	PREB	6.44893	6.03333	6.14867	5.94906	6.19119	4.34299	6.5132	6.27356	6.34667	5.44487	5.9515	5.69667
8123232	SLC22A1	5.35449	6.90683	7.60693	7.70012	7.72013	4.68043	4.58622	4.8624	5.64388	7.93241	8.15818	8.18006
7989132	RFX7	3.98131	4.00859	3.89989	3.67148	3.67909	4.50643	6.37059	6.34532	6.11348	3.53095	3.74621	3.48941
7953508	TPI1	7.98319	8.62746	7.81671	7.95232	7.17791	7.24888	8.62044	8.54822	8.57382	7.2924	7.19521	7.6551
8019545	B3GNTL1	6.55203	6.55906	6.17764	6.4421	6.79791	5.51687	5.4424	5.67611	5.56288	6.6695	7.12078	7.09922
8153684	DGAT1	7.72745	8.33286	8.05704	8.49298	8.22977	6.3607	8.01671	7.96217	8.07674	8.45145	8.45998	8.74287
8153939	DGAT1	7.72745	8.33286	8.05704	8.49298	8.22977	6.3607	8.01671	7.96217	8.07674	8.45145	8.45998	8.74287
8081256	TBC1D23	6.14864	6.04209	5.92566	5.96082	6.18305	3.9302	5.80853	5.82984	6.03556	5.74276	5.64439	5.58285
8062174	ERGIC3	7.82072	7.36896	7.42164	6.79984	7.05646	6.67544	9.04852	8.9475	8.87067	7.17183	6.93473	7.1185
7941537	PACS1	7.78529	8.40625	8.54506	9.01412	9.03318	6.55578	7.16765	6.97402	7.29928	8.71585	8.80739	8.98725
8016562	SPOP	6.89017	7.04274	7.21334	7.48394	7.34304	5.57573	7.34912	7.45619	7.41132	7.37423	7.35089	7.8231
7959251	P2RX7	3.6698	3.5725	3.45446	3.95753	3.69952	4.35245	7.29657	6.71259	7.30996	4.15811	4.00693	4.10578
8021653	SERPINB8	6.65045	5.63598	6.24605	5.21514	5.6114	5.07619	6.93954	7.1313	7.03056	5.12443	4.75081	5.85853
8178322	SUMO2	9.09272	8.76965	8.92094	8.6452	8.56596	6.02377	9.47254	9.57875	9.54942	8.28956	8.68543	8.55011
8171111	SLC25A6	8.08015	8.69126	8.13397	7.97639	7.59596	7.01111	11.6275	11.5803	11.6336	7.39412	7.55962	8.02787
8177003	SLC25A6	8.08015	8.69126	8.13397	7.97639	7.59596	7.01111	11.6275	11.5803	11.6336	7.39412	7.55962	8.02787
8013159	TOM1L2	6.86218	7.07515	6.70495	7.44403	7.52927	6.0411	7.25866	7.33728	7.06835	7.20979	7.24072	7.73629
7921882	OLFML2B	3.35216	3.4104	3.33086	3.54155	3.7199	3.9441	4.21833	4.16908	3.84105	3.88881	3.89025	3.60487
8024070	KISS1R	5.05456	5.38424	5.18502	5.64277	5.40949	5.36115	4.76626	4.58658	4.81593	5.76469	5.58072	5.53321
8063566	RAE1	6.95265	6.35046	6.54597	5.91267	5.45366	4.23972	6.99112	6.56395	6.55532	5.8821	6.0188	6.13108
7956031	ORMDL2	9.08118	8.88256	8.62173	8.1935	8.37497	5.41407	8.42951	8.51727	8.4549	8.26006	8.34413	8.61288
7938329	SNORA23	12.3949	12.1	12.6513	12.6587	12.4719	11.8726	12.5696	12.3662	12.3416	12.997	13.0511	12.6551
8051812	---	2.25304	2.92052	3.10238	4.61199	4.99684	2.94584	2.39307	2.29516	2.09468	3.13373	3.56418	3.84046
8165669	ATP8	11.5902	10.7621	10.75	10.154	10.1751	9.9573	11.3635	11.587	11.2512	10.3202	10.2884	10.5218
8099410	BOD1L1	7.05888	7.42191	7.7079	7.86473	8.09291	5.32515	5.85477	5.8053	6.00936	7.73366	8.27858	7.9341
7906140	PMF1-BGLAP	5.72946	5.87579	5.94555	5.99407	6.19248	6.53908	5.90449	5.62104	5.85439	6.37786	6.37121	6.07425
7979658	GPX2	3.07701	2.72144	3.10842	2.94507	2.92302	3.23363	2.84171	2.73225	2.64337	3.38313	3.48341	3.27636
8180240	---	5.67419	5.15326	5.49489	6.17885	5.97251	5.37801	5.72068	5.36316	5.76853	5.83787	6.02111	5.99315
7940891	DNAJC4	7.89497	6.81299	6.64297	6.3655	6.35662	5.74176	7.13308	6.95728	7.42925	6.03105	6.29901	6.38345
7927062	ZNF33A	6.38234	5.91661	7.00144	6.94716	6.88078	5.66648	5.50426	5.7767	5.53479	7.13289	6.96065	7.45853
8002342	---	4.41406	4.61765	4.54565	4.71761	4.42795	4.34267	4.83329	4.59822	4.64606	4.39159	3.56134	3.7909
8133654	SPDYE5	5.58295	5.71664	5.25357	5.6437	5.81778	6.16777	5.05778	5.06515	5.33965	5.88308	5.99497	6.03848
8125731	ZBTB22	6.01694	6.05259	6.13091	5.99115	6.14223	6.63639	5.78843	5.61171	5.68379	6.27631	6.5151	6.48409
[truncated: 27,097 more rows]

## Sheet: Raw data w_o HCN3
Gene.Symbol	HCN1	HCN2	HCMo1	HCMo2	HCMo3	BC1	BC2	BC3	S1	S2	S3
HLA-DRA	6.8856	6.5141	11.937	11.9809	11.8498	6.40188	6.97638	7.1525	3.75379	4.47599	3.72664
CD24	4.65474	4.08737	2.21234	2.11715	2.07331	4.94133	4.70122	4.9422	7.35486	7.79058	6.92295
AGAP6	8.30882	7.95783	6.9837	6.93062	7.161	7.36545	7.52584	7.19183	5.29128	5.69442	5.68229
AGAP9	8.4027	8.16493	7.10452	7.05306	7.31374	7.51034	7.57374	7.40794	5.41907	5.85682	5.93335
AGAP9	8.4027	8.16493	7.10452	7.05306	7.31374	7.51034	7.57374	7.40794	5.41907	5.85682	5.93335
CD177	6.40028	5.86868	4.81686	4.75008	4.70586	7.29793	7.29462	8.49802	12.6137	11.2214	12.5709
AGAP6	8.33284	7.98069	7.08591	7.00253	7.24662	7.40322	7.50557	7.21289	5.29106	5.77174	5.72566
DIAPH2	5.20371	5.20288	8.32509	8.31125	8.57136	5.40054	5.70939	6.00203	7.65816	7.31928	7.46991
AGAP6	8.35859	7.99042	7.0905	7.00738	7.23984	7.43726	7.4957	7.2852	5.30125	5.75821	5.83704
HLA-DRA	6.76552	6.33176	11.7449	11.8609	11.7229	6.14063	6.8506	7.01815	3.6061	4.40473	3.71671
AGAP6	8.29262	7.90426	7.07958	6.95086	7.21576	7.3104	7.43827	7.25376	5.32648	5.73641	5.84421
HLA-DRA	7.04121	6.42616	11.8092	11.9163	11.7623	6.27788	6.99073	7.19591	3.66643	4.45938	3.70651
AGAP6	8.16497	7.79585	7.04162	6.98744	7.17796	7.19473	7.40979	7.28776	5.31061	5.84084	5.775
AGAP6	8.2638	7.92173	7.0798	6.97128	7.20511	7.32186	7.42924	7.28594	5.33825	5.90034	5.8493
---	8.23377	7.70832	7.06344	6.71902	6.96436	7.03467	7.40564	7.41413	5.56366	5.58863	5.69182
HLA-DMB	7.13496	6.38327	11.6835	11.9337	11.6425	6.94482	6.89469	7.07834	5.0765	5.21956	4.69219
HLA-DMB	7.10204	6.33454	11.6264	11.8416	11.547	6.96094	6.84274	7.04452	5.06158	5.19415	4.69708
VRK1	5.97046	5.63215	6.63749	6.63966	6.64347	5.90378	6.35593	5.94963	7.59794	7.4131	7.77158
NDUFB9	5.49533	5.79205	8.07138	7.98879	8.04017	5.36284	5.33368	5.55935	8.06207	7.23015	7.16396
CFAP54	4.49367	4.16095	3.44546	3.24054	3.261	4.64165	4.77658	4.68713	3.58019	3.50038	3.47295
FHDC1	4.14489	3.99288	3.54295	3.54548	3.21415	4.75214	4.79771	4.65214	3.53	3.61239	3.58466
RBX1	7.99078	7.61504	9.76937	9.7957	9.83632	7.52907	7.58515	7.94893	9.56608	9.33615	8.99702
UGCG	5.70239	5.87494	4.96971	5.03339	4.7959	5.73339	5.38001	6.05664	7.23285	7.69727	7.95363
VAT1	5.30016	5.48112	6.38387	6.17387	6.72408	5.81996	5.70039	5.87422	7.42706	7.39424	7.04026
NDUFS5	7.50985	7.24795	10.5506	10.3543	10.4354	7.24506	7.18705	7.24506	9.52159	9.02389	8.57429
PKM	6.53649	6.71738	9.17996	9.04799	9.1593	6.35151	6.59492	7.2355	9.31323	8.50019	8.79575
ATP13A3	4.51152	5.14791	6.31366	6.29943	6.26999	4.34299	4.33751	5.33118	7.08665	6.72039	7.02009
STOM	6.04213	5.40657	6.53733	7.00587	6.98683	6.77941	6.58857	7.3798	10.0282	8.93873	9.84307
MACF1	5.81575	6.08612	6.44199	6.39717	6.78267	5.32983	5.75247	5.6347	8.33904	7.1605	8.03599
CTSC	7.45641	7.54385	8.228	8.30457	8.30179	7.49093	7.35937	7.85606	8.76444	8.72778	8.65572
ADAM28	5.94606	5.51804	5.70249	4.70765	5.6063	6.25026	6.16972	5.84493	3.64541	4.13429	3.90619
PLAC8	5.80709	4.82953	8.66731	8.59648	10.043	4.97708	5.5096	6.67724	11.5866	9.79529	10.2326
GPR160	6.4253	6.4444	5.16482	5.58088	5.23993	6.42639	6.29647	6.74292	7.83766	7.75032	8.2282
CYBB	9.11533	8.73014	12.0801	11.9622	12.0314	8.51106	9.1529	9.54772	11.3891	11.044	10.8319
---	5.84621	5.97717	11.2791	11.5123	11.2904	6.1574	7.01716	6.84253	5.05948	4.93169	5.1351
GAPDH	10.939	10.5715	12.225	12.0544	12.3385	11.0498	10.8532	11.2716	12.5314	12.4794	12.1664
MPZL1	8.58662	8.45143	6.57883	6.67673	6.42106	8.74714	8.39868	8.86924	7.39813	6.87481	7.40834
RPL27	10.9464	10.9887	13.0854	12.9827	13.1118	10.828	10.4596	11.0025	12.2361	11.8606	11.9766
---	7.66967	7.25082	6.70725	6.51141	6.72106	6.62974	7.07276	7.06058	5.69375	5.66973	5.47748
ENO1	8.3752	8.23767	11.4895	11.2342	11.4549	8.40674	8.50109	9.54173	11.4385	11.0459	10.7362
APP	4.88801	5.19102	7.88812	7.50291	7.70018	5.36788	5.05786	5.22802	7.72633	6.86356	6.75045
---	6.59457	6.32685	4.64474	4.68091	4.68366	5.92234	5.94516	5.9094	4.74422	4.9982	5.07966
RCN3	7.08666	7.06916	5.90813	5.71296	6.01824	7.17286	7.12735	7.3959	5.56895	6.15228	6.05899
NCOA4	10.1742	9.85433	9.16132	9.13166	8.91009	9.73799	9.74353	9.79937	8.28873	8.70565	8.73303
ESD	4.4329	4.48371	8.04643	7.9842	8.08442	4.18995	4.79642	4.78741	6.94057	6.01805	6.28034
SGTB	5.92018	6.4741	6.64014	6.65427	6.38184	5.99246	5.96972	6.35544	7.93006	7.45118	7.47321
RETN	6.64076	5.72854	7.32401	7.21514	6.67876	7.12405	5.96251	7.37296	11.415	10.9584	9.5773
GYS1	6.16914	5.77723	7.00443	6.9453	7.12666	5.64884	5.99961	6.11314	7.68263	7.27704	7.10131
FAM214A	8.08718	7.84559	6.05115	6.14752	6.13121	7.84333	7.9708	7.78529	6.37503	6.81912	6.92059
ANAPC15	8.44404	8.54611	9.97475	9.65537	9.74278	8.69998	8.39809	8.87102	10.266	9.76478	9.83464
CSF1R	7.29231	7.47429	9.83147	9.95826	10.0282	6.43955	7.45519	7.44724	4.70239	5.50614	4.91219
MAFG	7.89214	7.51759	8.2225	7.90566	8.48682	6.4237	6.3127	7.15771	8.36423	8.26	8.36029
---	4.63336	2.73016	2.07902	3.02624	3.36908	4.63051	4.82789	7.14828	11.4932	9.94515	11.3509
PHOSPHO1	9.97438	10.0559	3.54804	3.66484	3.65395	9.46399	9.40717	9.92424	4.85416	7.03335	6.81998
GPN1	4.60719	4.59574	6.84878	7.21581	6.97056	4.09623	4.19824	3.71503	5.09744	5.08215	5.10536
SVIP	5.70558	5.79795	4.40252	4.88577	4.85073	5.79065	5.30706	6.04443	7.24509	7.72314	7.11077
MED25	8.36382	8.28975	6.38657	6.50832	6.50372	8.17955	8.25709	8.60549	6.93602	7.44283	7.20728
ENY2	6.12311	6.61325	7.53918	7.54948	7.53816	6.15576	6.19246	6.51907	8.12458	7.37003	7.78514
GSAP	5.11968	4.60948	7.73211	7.39069	7.44913	5.01846	4.9011	5.49906	6.58178	7.20247	6.5856
CCNB1	2.739	2.64922	2.65583	2.69495	2.74328	2.81854	2.75301	2.74919	3.55459	3.45684	3.47837
MACF1	4.94912	5.11894	5.78104	5.4376	5.62772	4.49796	5.04038	4.66583	6.75127	5.96906	6.11092
---	4.08357	4.01809	4.10898	3.64875	4.67754	5.17396	4.95838	5.46739	8.48867	6.9504	8.33464
MAFG	6.75498	6.6214	6.71441	6.56602	6.92981	5.81079	5.64254	6.06766	7.00845	6.79329	6.85308
DHFR	3.98948	3.97425	4.13291	3.90051	4.35587	4.07157	3.52463	4.16849	5.21122	6.03745	5.4816
COX6C	6.86901	6.62223	10.9922	10.8357	10.9638	6.47469	6.25498	7.36531	10.1131	8.8129	8.81644
MPDU1	5.8939	5.37261	8.697	8.87391	8.98805	5.30216	5.61493	5.49905	7.49475	6.69336	6.84223
RPS25	9.84778	9.86931	12.1415	12.0282	11.9311	9.07811	8.97826	9.30534	10.3022	10.02	9.94194
MRPL51	7.11003	7.08562	8.61736	8.77229	8.66962	5.95279	6.57702	6.9686	8.19744	8.10935	7.83964
---	6.13707	6.1276	5.52391	5.62728	5.35341	6.66972	6.89103	6.74732	5.46571	5.74206	5.98548
RABGEF1	7.2454	7.54882	6.87605	6.72239	6.62268	7.07783	7.05668	7.7661	9.05669	8.51943	8.76564
ECH1	6.51475	6.39307	9.06843	8.82137	8.85471	5.96672	5.68712	5.94041	7.37346	7.35596	6.70833
NDUFA8	5.02324	4.62726	7.43561	7.47197	7.50362	4.94778	4.94696	4.81745	6.44084	5.77249	6.10013
SEC23B	5.73651	5.86944	6.52528	6.15832	6.48717	5.54723	5.59788	5.76196	6.90792	6.47554	6.66622
SNORD46	7.00854	6.92176	6.7196	6.49207	6.56377	7.09865	7.04964	7.17759	6.3601	6.28051	6.39845
SEC61G	5.6874	5.73274	8.13704	8.09384	7.90183	5.44741	5.18993	5.73262	7.51042	6.64942	6.78851
SNORA21	6.9011	7.01442	5.40659	5.61102	5.97715	7.06362	6.81409	6.99869	5.42914	5.99877	5.664
TSPYL1	5.08567	5.35832	3.89716	3.76944	3.49411	4.96897	4.7226	4.95495	3.81886	4.00977	3.80651
TMEM252	4.95921	5.24638	3.67862	3.39557	3.68313	5.30435	5.75103	5.91306	3.62992	3.63698	4.52456
KLHDC8B	5.31337	5.54946	5.37038	5.36711	5.36899	6.01583	6.02138	5.86526	4.9031	4.66066	5.23227
RABGGTB	3.72974	3.51454	6.10316	6.42717	6.42641	3.35187	3.37229	3.54883	4.46885	4.24108	4.35376
NDUFAB1	5.23166	5.31953	8.62094	8.48199	8.55675	4.57036	4.22026	5.19795	6.47481	6.40059	5.90971
PBXIP1	7.45159	7.61379	5.86392	5.845	6.03034	7.59557	7.53233	8.21432	6.50985	6.70432	6.43489
CSRP1	6.42591	6.60666	9.08569	9.00158	8.98731	6.63122	6.34777	6.543	7.33623	7.28305	7.62751
---	6.02573	6.1376	11.5253	11.8543	11.5628	6.47052	8.06902	7.17373	5.08861	5.1452	5.13536
COMMD1	5.31022	5.2817	8.65346	8.50319	8.39495	5.21945	5.15882	5.57228	7.45402	6.68104	6.46938
---	6.3145	6.52205	8.15055	8.24248	7.97836	6.62252	6.42166	6.81036	7.76688	7.43082	7.95586
LCMT1	5.57346	5.62398	6.60844	6.72936	6.73918	5.1745	5.08693	5.23972	5.7762	6.1413	6.02982
COX7A2L	5.6986	5.76311	6.99808	6.84146	6.77138	5.465	5.56579	6.08022	6.85187	6.72987	6.72035
SLC45A4	7.80567	8.32206	4.27108	4.12679	3.99521	7.89016	7.80657	7.95311	5.5254	6.75562	6.11132
NEDD4	3.95069	3.86781	4.29705	4.26688	4.56175	3.76933	3.89426	4.18344	7.13546	5.52936	5.84195
PSMA6	7.93379	8.25451	10.2404	9.97934	9.90594	8.26096	8.3864	8.38193	10.4693	9.6681	9.47066
PRDM1	8.17904	7.7589	5.43461	5.7819	5.51266	7.79933	8.66585	8.32025	6.26837	6.88428	6.83064
---	5.02408	5.76831	3.44657	3.86617	3.87291	4.84487	5.23174	5.00791	2.85448	3.81615	3.11101
C9orf129	9.14897	9.32351	8.91714	9.18425	8.8734	9.25643	9.45802	9.32717	8.31572	8.35293	8.64413
SREBF2	5.30542	5.44758	6.7521	6.54092	6.61756	5.07926	4.89521	5.26795	5.97869	6.28878	5.87189
PTDSS1	5.54276	5.36899	8.53492	8.2332	8.72943	5.43302	5.06988	5.65267	6.81552	6.73871	6.36621
---	5.12824	4.87485	6.25138	5.79118	6.13275	4.63473	4.62289	4.79991	5.62526	5.56526	5.92282
ZNF200	6.68932	6.65694	5.40245	5.38683	5.19743	6.82141	7.0111	7.21764	5.49395	5.91451	6.18336
METTL4	7.07913	7.04291	6.21036	5.9714	6.2575	7.27865	7.14657	7.30741	6.51911	6.3122	6.52578
---	5.84117	5.97057	11.2152	11.5428	11.2674	6.26234	7.82365	6.87865	5.04783	4.95868	5.02773
MIOS	4.51827	4.8382	6.52596	6.59017	6.79913	4.6882	4.54232	4.81378	5.83711	5.86145	5.42124
OGFRL1	9.50864	9.66101	8.67241	8.79895	8.45923	9.26361	9.53486	9.27973	7.94454	8.517	8.38426
HP	5.71705	3.75626	5.58176	6.1636	5.57169	7.0676	6.90444	7.40704	9.99978	9.36022	10.1169
PELI1	10.6682	10.6774	8.52145	8.517	8.16408	10.6766	10.8119	10.5021	9.85609	9.52014	9.79543
TESC	6.18403	5.53495	7.03107	6.92647	7.58261	5.9588	5.37662	6.49086	8.19305	8.07609	7.49649
EIF2B1	5.27447	5.45003	8.01539	8.05223	7.94847	5.29011	5.56918	5.63148	7.18689	6.54716	6.40928
INSIG2	5.66942	5.81606	5.91207	6.05479	5.99538	5.26954	5.62111	6.14339	7.54296	6.73489	7.34255
DHFR	4.13258	4.05277	4.30086	3.88531	4.54577	4.27012	3.57778	4.25958	5.43412	6.29374	5.50496
HPR	5.3325	4.78512	4.47674	4.92506	4.61804	5.11198	4.97265	5.21977	6.37267	6.06585	6.17375
TCN1	6.71513	6.67584	3.36772	3.8684	3.40526	7.64752	7.36024	8.25396	9.13146	10.5486	9.87983
CEBPZ	3.62084	3.81962	5.00713	4.8822	5.17107	3.6449	3.39772	3.61593	4.95716	4.50019	4.35814
MMP8	6.10186	4.11592	3.137	2.23888	3.34823	6.96059	5.73664	7.62279	11.3662	9.97227	10.3885
LDHA	7.18593	6.80198	8.3227	8.42207	8.63608	7.47989	6.7366	7.59053	10.3756	8.86918	9.22731
MDH1	4.68942	4.25549	7.59886	7.55366	7.49476	4.47159	4.58941	4.62531	5.86978	5.80314	5.27569
TPST2	7.21461	6.45226	6.43741	6.00284	6.31004	6.38948	6.43869	6.73007	8.76416	7.68809	8.30932
BPI	7.367	5.7964	6.06576	5.85167	5.69693	7.31188	6.91641	8.10291	9.51022	10.4172	10.1227
GPR84	6.49047	7.80982	6.25927	7.11428	6.72063	6.48142	6.60936	7.33451	9.73416	9.3782	8.68039
BTLA	4.01571	4.26548	3.10656	2.87733	3.00001	3.83986	4.24293	4.37136	3.24346	2.95359	3.22407
---	5.14487	5.58456	7.33528	7.47639	7.3571	4.99619	4.83288	5.14246	6.29322	5.76277	6.07477
UROD	5.82759	5.60021	6.90932	6.8605	6.99404	5.14852	5.11173	5.23698	7.0043	6.02373	6.38112
NMT1	7.32472	7.56513	8.62399	8.71127	8.96289	6.83636	7.33097	7.30705	8.74472	8.1192	8.28393
MTDH	6.53341	6.19211	8.09395	8.09361	8.36108	6.72084	6.36813	6.6395	8.22361	7.73746	7.46747
SNX3	6.85058	6.81345	7.73838	7.63998	7.57325	7.02115	7.4328	7.36777	9.09965	8.09912	8.93399
C3AR1	5.33684	3.83068	7.45383	6.42445	7.6106	6.85315	6.58309	7.20021	9.11731	9.43971	10.2528
QSOX1	7.35992	7.39792	7.98473	7.64696	8.19726	7.39078	7.28003	7.54943	9.21647	8.58499	8.38863
CDCA7L	4.18456	5.06401	4.00616	4.29244	4.93283	5.83531	4.88611	5.32345	7.56245	7.0848	7.25611
EZH1	8.80716	8.80755	7.66548	7.67905	7.47751	8.7875	8.96477	8.64517	7.83534	7.83319	8.177
NCKAP1L	8.17503	7.79345	9.47662	9.39692	9.54505	7.7601	8.41004	8.50052	9.9644	9.31286	9.52233
GUSB	6.63562	6.47276	8.45684	8.41101	8.74067	6.28889	6.37755	6.40407	8.43049	8.07431	7.22965
GPI	5.77558	4.40754	7.99068	8.02074	8.38476	5.09735	5.84436	6.06278	9.30295	8.35952	7.62207
ARL6IP5	8.77565	8.49956	9.5167	9.33799	9.64038	8.75937	8.78247	8.84599	9.79876	9.44374	9.69401
CD3D	5.43603	5.3631	3.7534	3.24898	3.68646	4.07077	4.66357	4.6432	2.91707	3.36909	3.32544
FAM96B	8.25014	8.12172	9.60733	9.52542	9.51321	7.95767	7.92298	8.13588	8.77077	8.63281	8.65732
DLG1	4.54704	4.19944	6.09588	5.59514	5.75298	3.70784	3.71306	3.9171	4.80476	4.97186	4.61408
NDUFA4	5.86797	5.82071	8.44216	8.67057	8.66847	6.02036	5.45327	6.28296	8.5234	7.5234	7.27299
KMT5A	7.45921	7.61114	7.32176	7.03562	7.34059	7.25389	7.21417	7.41831	8.59821	8.07978	8.13614
LCMT2	5.651	5.69514	4.81403	4.88689	4.51251	5.43779	6.30498	5.61713	4.63926	4.52666	4.28802
CHIT1	4.55471	4.26804	3.47846	3.68455	3.48552	5.44329	4.66866	5.56363	6.33611	6.97432	7.18698
BTK	5.61784	5.64794	6.9138	6.76398	6.60964	5.41773	5.63861	5.91079	6.54667	6.44435	6.73803
---	7.81808	7.62386	4.74644	5.22867	4.70917	6.8306	6.77272	6.57289	5.04677	5.87839	5.08775
TMCC1	8.24598	8.06011	5.76217	5.50148	5.52518	7.47061	8.30734	8.3168	5.72154	6.81335	6.3328
CPNE3	7.69114	6.97835	7.78502	7.99463	7.91628	7.65713	6.90644	8.016	9.00154	9.33928	9.13609
DDAH2	7.32502	7.10609	6.56755	6.61802	6.58405	7.01236	7.32063	7.27856	9.05417	8.05001	8.4682
DDAH2	7.32502	7.10609	6.56755	6.61802	6.58405	7.01236	7.32063	7.27856	9.05417	8.05001	8.4682
SNORD32A	10.0982	10.3473	9.28196	9.02453	9.1515	10.3528	10.8363	10.121	9.46246	9.28348	9.33662
TIGD3	7.50935	7.48462	5.14323	6.03209	5.91606	7.17188	7.06366	7.93335	5.08288	6.03494	5.33951
PROSER1	4.81944	5.07217	7.22622	6.83482	7.23756	4.95918	4.7567	5.18789	7.43046	6.16439	6.45109
P4HB	8.78333	9.1949	10.2519	10.066	10.0353	8.17192	8.10996	8.09544	9.73033	9.91713	8.91021
ERV3-1	10.2304	10.2465	7.47938	7.55026	7.17834	9.54963	9.74158	10.1853	8.77824	8.91688	8.58781
FIBP	6.00759	5.99349	7.72855	7.55794	7.67008	5.71135	6.19822	6.13308	7.59042	6.79347	7.243
CAPG	6.50601	6.13401	9.35027	8.5877	8.8394	6.67258	6.81001	7.41641	9.64036	8.26068	9.11702
BARD1	3.02204	3.27321	4.39534	4.80875	5.06472	3.34142	3.90705	3.56235	4.66447	4.77788	4.83687
PTPN2	5.06218	5.25852	6.58221	6.64253	6.57358	4.83167	4.96614	4.90807	6.30487	5.87897	5.56626
---	5.33054	5.59727	7.91715	8.23088	7.85576	4.50385	4.33391	5.50927	6.79876	6.34822	6.25744
MTF1	8.36767	8.69937	8.28877	8.15201	8.08707	7.84757	7.81107	8.51646	9.18276	9.1667	9.72936
FERMT3	9.07868	8.98329	9.01424	8.76776	9.16896	8.29011	8.53277	9.02218	10.0236	9.65008	9.67026
HCFC1	5.52984	5.84275	8.43588	8.20931	8.58773	5.81159	5.36568	5.64823	6.69963	6.5161	6.46188
DBI	6.19302	6.36599	7.47136	7.24188	7.43827	6.47544	6.21956	6.10126	7.1183	6.95755	7.0953
NUDT21	5.44109	5.0511	6.13893	6.21501	6.38176	4.72185	4.88061	5.14732	6.42024	6.02631	5.7383
B3GNT2	7.58159	7.72912	7.20072	7.36163	7.44618	7.3316	6.42704	6.85328	8.34103	7.85814	8.47504
TXNL4A	5.30184	5.07298	6.91166	6.9308	7.23415	5.05308	5.16105	5.36345	6.62708	6.4533	5.90449
ATP8B4	5.62671	5.36125	5.62329	5.76677	5.68609	4.91707	5.96655	6.40963	7.6745	7.31938	7.92299
PRKDC	4.87297	5.0378	5.23635	5.12101	5.22621	5.77873	5.12156	5.77326	4.23332	4.63789	4.50377
---	6.44994	6.53807	4.08953	3.76606	4.18705	7.3694	6.28458	5.85799	3.42612	4.71383	4.41631
MTHFD2	3.87628	4.20393	5.66028	5.80553	5.52538	4.90465	3.80488	4.05759	5.61252	6.01259	5.65013
CD63	11.2016	11.1477	10.9506	10.9585	10.996	11.0753	10.9642	11.3582	11.9281	11.7594	11.956
GVINP1	5.92827	5.04702	4.74147	4.85687	4.65949	6.21441	5.87823	6.07381	4.42666	4.99882	4.78523
PARL	7.21556	7.26622	9.04428	9.04496	9.00634	5.94241	6.55404	6.95292	8.35696	7.68542	7.75442
DDAH2	7.3252	7.11299	6.53012	6.56949	6.57943	7.07713	7.28563	7.28166	8.98899	7.98353	8.43456
POMP	7.80124	7.76771	8.35416	8.57255	8.4086	7.96053	7.90462	7.92631	8.78437	8.50882	8.55983
SNRPD3	7.86322	7.45694	8.92186	8.73026	8.73398	7.35298	7.21149	7.34223	8.25453	8.34294	7.94704
CLCN4	5.30025	5.49352	4.05078	3.8144	3.62745	5.35758	4.86329	5.64727	3.86577	4.30752	4.0457
COPS2	6.24489	6.04323	7.35462	7.47385	7.14609	5.43267	5.29642	5.64861	6.65913	6.34123	6.18928
TMEM167A	6.72637	6.41822	7.67069	7.94268	7.67297	6.95249	6.6083	7.09726	8.06751	7.65977	7.92548
HEXA	5.15188	4.74766	7.74105	7.28089	7.36492	4.56967	5.20063	5.34585	6.57744	6.26582	6.18868
TPT1-AS1	4.43427	4.81172	4.93794	4.65794	4.67075	4.42975	4.72691	4.92076	6.11238	5.67334	5.58254
PPIP5K2	5.95384	6.56516	6.87173	6.81198	6.77374	6.08513	6.1743	6.41553	7.27014	7.06249	7.20563
IL5RA	4.50417	4.0195	2.79582	2.75006	2.57943	3.86785	5.65433	4.57605	2.5929	2.79057	2.49156
ADAM15	6.36942	6.67463	7.53928	7.46591	7.38903	6.59025	6.42557	6.53156	7.38819	7.25306	7.11754
GTF3A	6.30477	6.27649	8.38256	8.45345	8.35174	6.79312	6.30772	6.68979	7.49995	7.26985	7.67451
BTN3A3	6.81722	7.11664	6.19721	6.52103	6.61849	6.82459	7.09622	6.60881	4.27633	5.79195	4.93455
EIF3M	5.77695	6.22865	10.073	10.1395	10.0167	6.12102	5.37314	6.12109	8.04152	6.91092	8.06662
TMEM203	5.70873	5.25633	7.76591	7.721	7.87251	5.13368	5.17208	5.70244	6.47833	6.554	6.18979
TOPORS	7.46202	7.56954	5.45229	5.49156	5.61392	7.58058	7.89525	7.59136	5.4655	6.66646	6.44189
SLC15A2	4.74335	4.78145	6.26956	6.43958	6.59452	5.16307	4.66565	5.45569	6.63518	5.96899	6.61095
KMT5A	6.80163	7.07795	6.83277	6.53689	6.82909	6.88335	6.73606	6.96091	8.01849	7.6003	7.63438
CLINT1	6.89779	6.96102	8.1362	8.25451	8.29697	6.71738	6.37514	6.7304	8.6849	7.73509	7.62038
SLC45A4	8.29237	8.94393	4.96463	5.66024	4.73275	8.57082	8.41027	8.7112	6.28081	7.39667	6.59286
HLA-DMA	6.98773	6.87338	10.6473	10.8549	10.9028	6.38617	6.22458	6.85898	5.14862	5.69068	5.38174
HLA-DMA	6.98773	6.87338	10.6473	10.8549	10.9028	6.38617	6.22458	6.85898	5.14862	5.69068	5.38174
---	3.46587	3.59535	2.78239	3.56611	3.10669	2.76996	2.69909	3.11254	4.15999	4.43112	3.80138
RPL7	7.93326	8.02376	10.8938	10.9938	10.6581	7.76018	7.37967	7.90754	9.05332	9.09002	8.41122
RALBP1	8.6436	8.63636	6.50153	6.65989	6.81494	8.29448	8.48168	8.37116	7.58613	7.49952	7.82375
PKN2	9.21774	9.23034	7.33306	7.56905	7.36804	8.73755	9.04028	8.97646	7.18337	7.97964	8.02153
SGPP2	3.52449	3.44323	3.64382	3.47729	3.56769	3.65238	3.81022	3.65662	4.44176	4.69146	4.25221
ROGDI	6.05984	6.14621	8.10077	8.62114	8.07201	6.41441	6.24825	6.52047	8.57261	7.30016	8.07982
PRRC1	5.61006	5.3888	6.66841	6.3359	6.55767	5.39781	5.10266	4.98266	6.25664	5.9022	6.00805
---	1.49577	1.45244	1.70279	2.03216	2.40634	1.67835	1.6387	1.51028	2.43906	2.57154	2.70892
ZNF644	4.5637	4.63195	6.30843	6.619	6.77036	4.38896	3.85069	4.38653	6.04703	5.25901	5.29594
---	4.34735	4.56566	4.61856	4.71709	4.08745	3.23402	3.25834	3.88451	4.77815	4.61726	4.57503
UPP1	5.0544	4.89342	6.37442	6.48103	6.66765	6.27664	5.54404	6.23939	8.82435	7.1851	7.99155
---	7.33261	7.33223	6.88121	6.69044	7.10221	8.83171	7.66127	7.8249	6.81943	6.36458	6.52003
GNB2L1	9.68023	9.61154	12.526	12.5302	12.5051	9.4709	9.23098	9.83302	10.9974	10.752	10.2303
SMARCE1	6.95747	7.18895	8.39415	8.25665	8.50089	7.16596	7.26838	7.25598	8.03061	7.80265	7.92386
ABRACL	4.54297	4.63494	6.36567	6.62568	5.86258	5.09518	4.49945	4.86967	6.20382	5.79167	6.15685
CAPNS1	7.51266	6.93929	9.15583	9.14316	9.0736	7.54633	7.13765	7.51164	9.04761	8.20571	8.7459
NAA35	4.24132	4.56896	5.79235	5.97731	5.9563	3.85576	4.15606	4.29506	4.95606	4.88899	5.38721
ZNF318	4.86162	4.66263	5.97522	5.40682	5.64721	3.94346	4.07812	4.37976	6.10347	5.248	5.21075
MGST1	2.72287	2.9015	6.02511	5.86363	5.49926	2.622	3.02121	2.95138	5.26092	4.33572	3.93746
GTF2A2	5.96625	5.6691	7.0088	7.26418	6.88855	5.78753	5.97066	5.94754	7.2404	6.63267	6.79987
ALDH3B1	6.81915	7.20396	7.81343	7.95039	8.13692	6.85375	7.21343	7.06212	8.22829	7.7235	8.17973
EIF2AK1	6.92052	6.76286	7.98391	7.94234	7.98222	6.8772	6.83885	7.0425	7.87035	7.6343	7.45595
NDE1	9.16997	9.14976	7.51921	7.49126	7.34048	8.7032	9.03753	9.10482	7.42608	8.17417	8.02177
SEMA4A	8.29124	8.08615	7.53944	7.63244	7.54471	7.9412	8.38202	8.62377	9.43056	9.09789	9.34395
SPAG9	8.22066	8.315	6.27422	6.1432	6.01922	7.99489	8.15919	8.33791	6.65053	7.39027	7.27192
RPS29	4.3758	4.3865	6.28428	6.55239	6.27006	4.12829	3.97207	4.07619	4.93891	4.70394	4.66063
WDR41	6.2495	6.44836	7.96812	7.73701	7.79042	6.18256	6.80455	6.58477	8.17526	7.40646	7.5909
---	4.6223	4.53158	4.42215	4.33712	4.48489	4.91669	4.86173	4.82038	4.25728	4.27762	4.33982
PDE1B	6.34942	6.2948	6.98823	6.16442	6.08429	5.52972	5.98658	5.85775	6.88168	7.1552	7.17293
CUL4A	5.45495	5.4854	6.6722	6.22796	6.5311	4.64754	4.98896	5.17056	5.72701	5.84973	6.01602
SECISBP2	7.89351	7.87422	7.22256	7.21781	7.14458	7.78939	7.71471	8.13214	6.89592	7.28165	7.0571
VOPP1	7.19134	6.88394	6.36068	6.16673	6.10686	6.78287	6.53564	7.04344	7.58871	7.88607	7.60489
NDUFV2	6.79232	6.86523	8.42669	8.47182	8.60406	6.83045	6.90603	7.16257	7.5932	7.93645	7.65154
NUB1	7.02786	7.47711	6.70881	6.88349	6.86531	7.58166	8.22996	7.66114	6.49662	6.88079	6.81563
OLFM4	5.71052	5.7951	3.1722	3.64118	3.32419	7.33994	6.57533	6.4959	8.20847	10.7015	10.3413
NUAK2	7.64234	7.43403	5.31908	5.59031	5.59259	7.41868	7.78143	7.82986	6.55069	6.54536	7.03108
NUP85	5.55964	5.87652	7.19037	6.75743	7.16518	5.09086	4.87969	5.09357	6.13156	5.9317	5.7367
TMX1	5.35442	5.50654	7.82267	7.78734	7.36023	5.49819	5.91469	5.86327	7.06885	6.79323	6.52099
PTRHD1	5.53287	5.33656	8.05088	7.71391	7.93139	5.55317	5.08477	5.52176	6.24802	6.26408	6.18347
UQCRHL	7.38273	7.75782	9.85104	10.0351	10.16	7.27418	6.84807	7.12472	9.13526	8.76102	7.9006
PHF24	4.4389	4.81828	3.74313	3.73324	3.57597	4.73691	4.44558	5.11999	3.82712	3.84662	3.74571
POLK	4.84501	4.90582	6.36252	6.58576	6.57501	4.63798	5.11868	5.00227	5.87754	5.56577	6.04535
ANXA4	4.05272	4.81616	6.82802	7.18478	7.25163	4.12558	4.21837	5.35262	6.1915	6.27668	6.36635
IMMT	4.83075	4.75792	7.12594	7.08625	7.268	4.88201	4.8682	4.58974	5.72668	5.65939	5.31017
HLA-DMA	6.97733	6.7843	10.4962	10.75	10.784	6.30654	6.17407	6.74706	5.21415	5.67094	5.39702
PGAM1	8.81334	8.72252	9.47938	9.54825	9.66429	8.63166	8.69398	9.15854	10.1028	9.74638	9.55071
GGTA1P	3.80388	3.96382	5.91869	6.02232	5.76414	4.20198	3.40454	4.6746	5.41822	6.4577	5.691
AUH	4.68826	4.7929	4.88118	5.16188	4.76624	4.76631	4.67641	4.73642	5.50228	5.46492	5.31351
GNAI3	8.15859	7.9117	7.27729	7.41599	7.38797	7.58932	7.80037	7.96489	8.48546	8.80244	8.45337
CD46	10.8589	10.8725	9.30115	9.25568	9.09577	10.8419	10.8508	10.8037	9.77943	10.1548	10.2777
BATF	5.92748	5.50579	6.22707	6.1255	6.60439	6.17441	6.20857	6.7027	7.50588	7.36168	7.31622
AP4B1	6.01838	5.95594	6.66017	6.36293	6.19827	5.22552	5.45109	5.17554	7.25796	6.14887	6.49227
TCF12	5.30466	4.73364	7.99123	8.07509	7.96518	4.89501	4.71997	5.45053	6.49746	5.89808	6.57472
MS4A6A	6.59882	6.75927	10.8714	11.1327	10.8276	7.88466	8.07418	7.51829	10.0188	8.6854	10.1048
TMEM87A	5.49755	5.2515	6.71195	6.7774	6.5512	5.33089	5.21177	5.6575	6.6512	6.12736	6.23721
C14orf2	8.68935	8.76252	9.71206	10.0654	9.73176	8.82044	9.03072	8.86454	9.931	9.50005	9.71021
PEAK1	5.85864	6.06559	6.77804	6.9741	6.73815	5.90114	6.33306	6.20483	7.19276	6.78865	7.45739
PRRG4	8.4955	8.8963	7.09253	7.36204	7.68877	9.01905	9.18276	9.11986	6.68041	7.37244	8.15888
CSNK2A2	5.18268	5.16584	7.72086	7.58194	7.85172	4.66148	5.67252	5.73755	7.13469	6.5454	6.73
PGAM4	8.60501	8.55972	9.27223	9.35787	9.46123	8.48137	8.56481	8.93167	9.90294	9.54823	9.3146
PGAM4	8.60501	8.55972	9.27223	9.35787	9.46123	8.48137	8.56481	8.93167	9.90294	9.54823	9.3146
ARFGEF2	4.00354	3.83622	6.5816	6.68082	6.66201	4.14945	4.01742	4.28394	5.36197	4.9765	4.73032
CTSS	11.2089	11.3558	11.5305	11.8658	11.561	11.1995	11.4715	11.4168	9.95156	10.4422	10.6706
THYN1	5.68143	5.49348	7.09224	6.62594	6.83747	5.90208	5.53306	5.92436	6.72257	6.53171	6.66875
RPS24	5.49629	5.58743	7.05753	7.09446	6.81323	5.06537	5.4176	5.46222	7.06606	6.28996	6.17979
SEC14L1	9.84941	9.5915	6.66324	7.06172	7.00652	9.4192	9.70511	9.59837	8.37379	8.8764	8.7244
---	9.76385	9.68499	7.67943	7.88435	8.04787	9.10721	9.41032	9.43135	7.68338	8.46148	8.432
UIMC1	7.96265	7.63599	6.54341	6.55856	6.35836	7.92765	8.05844	8.21957	7.08959	7.32898	7.43659
MYO10	4.27961	4.03928	4.38016	4.40749	4.24162	4.72897	4.41163	4.40603	5.8239	5.12336	5.98541
---	8.62011	8.6302	6.16059	6.21646	6.39402	8.55039	8.56692	8.82159	7.77993	8.12308	7.657
DOCK5	9.51297	9.40564	7.20126	7.35164	7.22138	9.22762	9.38145	9.4566	8.27461	8.80693	8.61233
BAZ2B	9.72009	9.94018	8.02441	8.07655	7.86726	9.58214	10.1169	10.0538	8.08915	8.66665	9.11415
PGAM1	8.65505	8.58676	9.34583	9.41648	9.54123	8.49006	8.56108	9.04031	9.96833	9.6297	9.40714
PGAM1	8.67491	8.60271	9.34654	9.40747	9.5288	8.5019	8.5852	9.04906	9.96743	9.62863	9.41588
PSMC2	4.69407	4.05129	7.33102	6.92596	6.95275	4.06676	4.12981	5.06314	6.31472	6.06194	5.61622
SSBP1	6.38888	6.26084	8.82917	8.82335	8.83212	6.36387	5.70728	6.35739	7.63712	7.48106	6.87851
---	8.79573	8.64466	6.41667	6.3709	6.08151	8.31705	8.52866	8.53113	6.57148	7.66897	7.30082
C14orf166	6.60148	6.42526	8.96085	8.96634	8.55064	6.51474	6.51772	6.7106	7.75444	7.44408	7.23137
C5AR2	7.9656	8.29212	5.04354	4.90917	5.43385	8.07743	8.16322	8.29632	7.28967	7.18159	7.46382
SNORD42B	7.73781	7.94854	7.23872	7.02407	7.00793	8.04004	8.38583	7.43767	6.86718	5.69656	6.5145
TAGAP	9.00625	9.31395	7.28262	7.52193	7.10015	9.18428	9.30277	9.04658	7.53729	8.51215	7.57356
KCNAB2	8.85346	8.99608	9.62343	9.61966	9.55897	8.57485	8.4947	8.88076	9.4507	9.2486	9.31492
PDHA1	6.67601	6.54447	8.02148	7.51375	7.81449	6.02032	6.04565	6.49486	7.71606	7.73296	6.90632
CACNA1E	6.24042	5.96252	4.38801	4.73303	4.23662	5.71727	6.20689	6.56653	7.92816	7.2432	7.3062
NOL7	6.18382	5.68985	7.56086	7.47899	7.26876	6.36864	5.98208	6.52115	8.13106	7.1179	7.63952
TLE3	9.03664	9.03785	6.73765	7.02363	6.89158	8.90813	9.21914	9.24162	8.29769	8.4834	8.47173
SLFN13	5.09042	4.62171	4.74876	3.60579	4.52876	4.44983	4.84488	5.07702	6.14476	6.29336	6.43116
ANAPC16	7.21374	7.14389	8.26319	8.30104	8.17035	7.37884	7.05744	7.32785	8.17141	7.93425	7.80388
TCTN1	5.41117	5.452	4.88776	4.72782	4.8605	5.84676	5.35054	5.52813	4.7563	4.97042	4.70164
CA4	6.75944	6.9872	4.34807	4.29244	4.53846	7.40076	6.90965	7.24725	8.68042	7.84609	8.80311
LAMTOR4	10.0723	10.2777	8.78132	8.92387	8.74765	9.91947	9.96942	9.88944	8.84538	9.03389	9.44316
JPX	5.99383	7.16747	4.84795	5.00964	5.64696	6.87885	7.42157	7.11725	4.56585	5.57656	5.55294
SCARNA22	6.0248	5.96408	4.93706	4.86618	4.86162	6.24631	6.35304	6.32431	5.54721	5.56017	5.89106
TMEM14B	6.30273	5.68218	7.96929	7.9435	7.91515	5.91289	6.38189	6.21956	7.3411	7.02354	7.039
RAB18	8.22426	7.9475	7.09558	6.73669	7.08837	7.75454	7.85391	7.79286	8.54632	8.43103	8.54213
---	9.57308	9.41283	4.40148	3.46615	3.43634	7.57201	9.07714	8.12096	3.28849	6.46248	3.76939
MCEMP1	6.53841	6.51609	6.77874	6.89634	6.3681	6.70963	6.67072	7.78908	10.1294	8.36477	9.2433
LSM6	6.58623	5.93567	7.74844	7.96092	7.55011	6.09449	5.39858	6.45559	7.88599	7.07515	8.16112
HS3ST3B1	4.63333	4.76562	4.0979	4.15781	4.1615	4.54146	4.42621	4.60441	6.25902	5.12362	5.84774
DDIAS	3.85713	3.81267	4.62794	4.5554	4.82071	4.01424	4.49776	4.30995	5.38747	4.85226	5.43685
CD82	8.47831	8.28924	6.35027	6.51127	6.50579	7.56101	8.40794	8.4892	9.31268	9.28718	9.22445
PIWIL4	4.13558	4.19005	5.42174	5.31851	5.03006	3.6517	3.93134	4.48691	5.21778	6.65428	5.4893
PRKAA1	6.29029	5.92996	6.35625	5.94509	6.08254	5.96408	6.05553	6.40942	7.46928	6.82066	7.32322
RPL7	7.96044	8.04512	10.9196	10.9767	10.7087	7.8254	7.41197	7.91274	9.06734	8.97511	8.32798
TRMT6	5.20753	5.50616	7.27397	6.83481	6.93974	5.22664	5.52906	5.66205	8.18597	6.84429	6.67518
SPPL2A	6.66152	6.4668	7.0245	6.51221	6.82486	5.76244	6.33018	6.91294	7.7353	7.6761	7.52731
FBXO9	6.74166	6.47882	7.20534	7.15662	7.63366	6.5807	6.27978	7.34196	8.59994	7.82373	8.16323
RPS3A	8.0623	8.23168	9.72842	9.78377	9.59722	7.54231	7.5243	7.88559	8.50473	8.56387	8.18926
RPL7	7.92881	7.8245	10.8003	10.8159	10.5299	7.51923	7.11751	7.8743	8.87999	8.90161	8.23007
CST3	8.9311	8.58336	11.0746	11.0947	11.2731	8.73738	8.5699	8.89841	6.77406	7.90746	7.61163
BCKDHA	7.68795	6.81576	9.40361	8.82052	8.94596	6.8837	6.91202	7.41181	8.79715	8.29889	8.23011
MKI67	3.49314	3.09078	3.17697	2.81998	3.25298	3.08913	3.14833	2.84784	4.14032	5.19462	4.0609
RPS12	7.37366	7.50084	10.0701	10.2771	9.93516	6.90186	6.77299	7.3962	8.46165	8.18559	7.732
PSMA1	6.93296	6.61153	8.50352	8.59025	8.48067	6.64939	5.89615	6.73063	8.055	7.33163	7.62485
HNRNPA1P10	6.0664	5.9056	9.18925	9.21315	9.36239	5.825	5.60618	5.79956	7.04181	6.99622	6.24823
NDUFV2	7.21283	7.01038	8.67809	8.76281	8.93557	7.02125	7.06383	7.40123	7.81529	8.20871	7.87362
RAD54L2	5.02904	5.1572	6.4364	5.95763	6.3763	4.8127	4.68354	4.77669	5.74833	5.32418	5.71181
PPP1R12B	7.14391	7.07017	5.19761	5.43504	4.8334	6.68161	6.72081	7.20953	5.47753	6.12162	5.65819
ATP5O	7.77959	7.67729	10.007	9.94096	9.91474	7.30509	7.07839	8.04037	9.13995	8.53641	8.5118
UCHL3	5.11818	4.9248	7.41261	7.7401	7.53946	4.16125	4.4192	4.84135	5.63505	6.0835	5.24159
ING3	7.29075	7.0749	6.89985	7.46572	7.25291	7.38749	7.35353	7.37505	6.17137	6.71823	6.49824
VPS13C	4.70268	4.56713	7.06989	7.10135	7.12136	4.58128	4.81797	5.03785	5.93931	5.38421	5.63311
TRANK1	8.26135	8.8484	5.27705	5.89333	5.40137	8.51415	9.07567	8.75702	5.80655	7.08308	7.52088
TSPO	7.98424	7.68172	8.79421	8.55332	8.89362	8.33079	8.10925	8.72798	10.1905	9.35815	9.35989
HLA-DRB5	2.77815	3.17617	9.52703	9.65728	9.44035	3.47923	3.46328	3.66082	2.92861	2.84327	2.71625
FAR1	8.02409	7.71874	7.93433	8.05065	8.02103	7.40409	7.54656	8.01333	8.69601	8.37128	8.52842
---	5.97421	5.87176	5.21979	5.30263	4.83249	6.29478	6.77697	6.43838	4.74066	5.55278	5.58897
---	3.40571	3.51414	3.91498	3.31592	4.37446	2.79432	2.99781	2.88471	3.96268	4.15113	3.96916
IARS2	5.41585	4.75226	6.42241	6.01226	6.45984	4.71598	5.01131	5.32449	6.80989	5.85697	6.74995
FAM175B	5.94466	5.3894	6.87724	6.60631	6.47282	4.83426	4.99603	5.16409	6.23428	5.71735	5.99446
HNRNPA1	5.76968	5.57447	8.84805	8.8743	9.09312	5.43954	5.26571	5.41724	6.65296	6.67821	5.88242
CHCHD3	4.44146	4.92655	8.12677	8.17168	7.74473	3.92566	3.80983	4.52777	6.04263	5.23392	5.16777
DIP2B	8.72119	8.74424	6.87636	6.88185	7.0432	8.56069	8.81127	8.74447	7.97876	8.15414	8.17221
HCG27	7.51349	7.65726	5.01637	4.9191	5.38259	8.52642	8.28655	8.33661	7.76387	7.34472	6.97289
RARRES3	5.22424	5.3254	6.04099	6.39363	6.5209	6.00379	5.85701	5.41469	3.94671	4.92333	4.59255
BTN2A2	6.92602	7.05649	6.43989	6.22972	6.68337	6.53444	7.12294	6.98923	5.8059	5.99022	6.11409
PTOV1	6.85727	6.78198	6.03871	5.94472	5.95948	6.61713	6.69893	6.80479	6.11686	6.2116	6.18261
ACER3	4.43372	3.99818	7.31753	6.72216	7.41654	4.31325	4.46306	5.02699	8.62376	6.06132	7.06292
NUDT4	8.17586	7.3639	8.86395	8.84029	8.9563	7.65972	7.82972	7.64775	8.60398	8.58526	8.73985
DACH1	4.41876	4.82976	4.06759	3.8757	4.20899	5.01384	4.98456	5.2825	7.48916	5.86823	7.23906
C1orf162	5.99421	6.88708	8.93454	9.14771	8.86785	7.40015	6.58411	6.91873	10.0041	8.17139	9.01399
NLRP1	9.10632	9.11834	8.35565	8.29495	8.54615	8.91631	9.2383	9.0684	7.13447	7.77763	8.38939
TRPM2	4.66896	4.83204	5.52131	5.30765	5.74938	5.03078	5.12765	4.91908	6.52474	5.5959	6.34042
GBA	8.21092	8.25244	7.75109	8.05767	7.83425	7.40281	7.99361	8.3143	9.22349	8.71402	9.28576
GRINA	8.0858	7.45114	8.25412	8.42679	8.53887	8.10723	7.98368	8.62027	9.20941	9.24956	9.29699
CFAP58	4.04327	4.72603	3.19562	3.04648	3.24704	4.90233	5.64414	5.33482	3.6561	4.40794	4.02174
RPGRIP1	4.60597	4.70106	3.68389	3.68941	3.61757	4.62921	4.34627	4.77222	3.25355	3.73642	3.97851
P4HB	7.88815	8.0646	9.21203	9.11515	8.98861	7.22064	7.16327	7.63612	8.76831	8.63827	7.92216
FAM172A	6.97895	6.47704	6.99142	6.86033	6.77146	7.00448	6.49821	7.17925	8.56029	7.82642	7.90163
PSMD1	5.68594	5.41894	6.54804	6.32163	6.67573	4.94177	4.82432	5.54672	6.98046	6.16294	6.09203
TGFBRAP1	5.04722	4.74304	6.46342	6.68265	6.82215	4.93851	4.78665	4.73509	5.60321	6.29772	5.57601
MRPL15	3.65239	3.74514	6.43734	6.02719	5.79627	3.47943	3.44373	3.20702	4.30329	4.12862	4.17975
LRRC70	2.85867	2.32707	2.46391	2.33478	2.02309	2.46391	2.1709	2.53863	5.24111	3.33758	4.41327
POGK	4.78056	4.34574	7.25083	6.69333	7.07868	4.82242	4.42744	5.07473	5.7964	5.79355	5.74586
TNPO3	7.12038	7.02713	7.26467	6.86757	7.25436	7.14298	7.29143	7.41832	8.58521	7.82631	8.57053
CD9	5.61056	5.22364	5.62287	5.03214	5.011	5.45384	5.76919	5.34386	6.66694	6.29521	6.78527
---	7.12963	6.59983	5.27196	4.8233	5.22347	6.91398	7.53128	7.00483	5.39657	6.21051	6.02705
EIF4G3	8.24485	8.26113	7.80223	7.66958	7.64674	8.17719	8.17958	8.01955	8.70683	8.5717	8.80552
MSH3	5.45893	4.99207	6.17418	6.04788	5.98131	4.50901	4.89863	5.01467	6.50305	5.50574	6.06647
SPAG7	6.29478	6.30332	7.94006	7.4627	7.76299	5.70692	5.55315	5.96015	6.43301	6.5266	6.51334
SNORD55	10.2978	10.397	9.31067	9.01625	8.99113	10.4725	10.7851	10.3982	9.53836	8.66497	9.73621
NDUFC2-KCTD14	5.94379	6.64769	8.56979	8.55164	8.57839	6.08236	6.43807	6.21846	8.75832	7.06146	8.44433
CYB5R1	7.11705	7.2258	7.17784	7.3584	7.30343	7.27112	6.89261	6.8327	8.36274	7.749	7.70813
MTA2	5.83506	5.96269	7.41707	7.36866	7.45571	5.78247	5.58424	5.8228	6.52591	6.23943	6.27072
ANP32B	7.07368	7.11299	9.03827	8.98212	9.33078	7.27058	6.96478	7.20901	8.0846	8.27575	7.66642
SPDYE2	4.93687	4.94006	4.56994	4.73179	4.62709	5.26142	5.20891	5.35829	4.82532	4.6479	4.36354
DNAJB5	5.88049	6.08571	4.96267	5.49855	5.20133	5.97882	6.2998	6.58612	4.68217	5.50347	5.19669
WIPI1	7.16748	7.05588	6.16433	6.70839	6.25195	7.28756	7.15535	6.91698	8.42409	7.75262	8.17109
WDSUB1	3.1448	3.02183	3.69218	4.73983	4.37329	3.17375	2.65642	2.70087	4.65522	3.9136	4.08914
NSDHL	3.54534	3.74564	6.45335	6.34962	6.31529	3.99983	3.81072	4.13928	4.50644	4.67085	4.62869
PTPN22	6.20703	6.03013	6.52246	6.6905	6.13124	6.03605	6.45989	6.44738	7.89929	6.97548	7.66634
ELMO2	7.70393	7.11162	7.71383	7.39136	7.539	8.01809	7.4186	7.91844	8.98924	8.56243	9.30247
CYTH2	8.85191	9.18529	8.37519	8.31987	8.26317	8.76037	8.98466	8.95068	7.92887	8.40859	8.12379
TEX2	4.96338	4.91818	5.7436	5.75958	6.01588	5.34956	4.49052	4.86283	6.71748	5.66277	6.92436
RMDN1	4.05863	4.2579	5.4728	5.26772	5.49377	4.52496	3.9679	4.35436	5.96811	5.11197	5.17446
SUMO3	7.40561	7.0849	9.91742	9.62269	9.57198	6.50401	7.04526	6.83446	8.81706	8.15206	7.56165
---	4.90974	4.85948	4.25241	4.18546	4.07304	5.2851	5.09033	5.02156	4.47886	4.18688	4.64717
HNRNPA1P10	6.18573	6.01749	9.22459	9.16081	9.34044	5.73699	5.87747	6.07086	7.02374	7.10954	6.3696
COA3	5.05829	5.22523	7.98055	8.13158	7.87189	5.25255	4.8924	4.71246	6.28017	5.91674	5.56937
ZC3H15	8.50334	8.27043	9.06936	9.28433	9.12257	7.85417	7.83494	7.7833	8.74357	8.61983	8.25656
EXOC2	4.27282	4.18218	5.95704	5.75133	5.45262	4.35161	4.53487	4.61155	5.05983	5.36493	5.38134
SNORD29	9.33185	10.1497	8.67046	9.01708	8.85261	9.7752	10.2883	9.10268	8.54501	7.92869	8.16873
FCER1G	10.1114	9.57042	10.8563	11.0272	10.703	10.108	10.6554	10.5121	11.7991	11.1556	11.496
SMARCA4	5.75629	6.10952	7.50978	7.58815	7.38961	5.29865	5.52701	5.93746	6.58104	6.69259	6.25331
DDB1	4.60407	4.7226	7.07036	6.69065	6.80825	4.32304	4.78216	4.36557	5.81319	5.41824	5.12861
---	3.52761	3.57767	3.27481	3.38838	3.35242	4.10972	3.8464	4.01309	3.55422	3.34279	3.187
BTN2A1	7.9749	8.15908	6.77814	6.48272	6.87742	7.88192	8.41518	8.40894	7.00736	7.33202	7.53098
PAPSS1	5.53013	5.42186	6.18381	6.07456	5.87773	5.04495	4.5759	5.01423	7.29799	5.61069	6.88203
RPL17	8.10308	8.225	10.2333	10.2884	10.2574	7.97359	7.84925	8.20116	8.85649	8.95829	8.45159
PLGRKT	4.24077	3.67449	4.27936	4.46069	4.5265	4.35865	4.73337	4.60552	5.90171	5.6772	5.19183
REL	8.56176	8.46234	8.82327	8.95273	8.84936	8.26611	8.37002	8.39495	8.73261	9.12584	9.22112
CD68	7.07717	7.22707	10.1467	10.3903	10.2192	6.49642	6.56642	6.96655	8.12273	7.43243	7.4384
OR9A2	2.61735	2.63814	2.6425	2.82579	2.42694	2.95257	2.4522	2.47841	4.01335	3.23506	4.21522
SNAPC3	4.74025	4.80789	7.66134	7.88535	7.44938	4.78716	3.92444	4.66664	6.18289	5.23547	6.15846
MDH2	6.77365	6.94136	9.15372	8.96306	9.29471	6.20037	6.16756	7.01063	7.56983	7.67133	7.32963
HIST4H4	3.03697	3.59752	3.17063	3.16461	2.73485	4.21786	4.54091	3.84604	3.23561	3.19111	2.60114
PIK3R1	6.7968	6.87277	7.30717	7.41904	7.58889	6.64766	6.63496	7.05332	8.21049	7.42572	7.64823
CYC1	6.91688	6.66482	9.65003	9.61421	10.0662	6.46587	6.08976	7.04717	8.66571	7.62559	7.74535
PSMB6	7.64649	7.31366	9.09223	9.11296	9.23752	7.32535	6.86562	7.55575	8.70627	8.30818	7.9461
MTRR	3.69868	3.72599	6.81601	7.02573	6.84142	3.66931	3.94831	3.76902	8.2401	5.00514	6.86106
KLHDC10	5.53592	5.22692	6.93017	6.62986	6.91199	5.20122	5.36542	5.47137	6.54804	5.84573	6.48339
LAIR1	5.3887	4.99912	7.24339	6.8028	7.95893	5.40164	5.52183	5.38497	9.97883	7.23385	7.64885
KRTAP1-4	5.21946	5.39076	4.73591	4.65058	4.69624	5.58794	5.28583	5.26334	4.80267	4.84694	4.60937
---	4.53726	5.22323	3.57864	3.33208	3.77666	5.22659	5.4282	4.85846	4.42524	3.54721	3.58634
SUCLG1	5.40453	5.3617	6.45793	6.06406	6.23929	5.33444	4.99675	5.79338	6.5658	6.08212	6.5865
RNU5A-1	3.57181	4.13068	3.63541	2.84573	2.64739	4.32163	5.05898	3.78172	2.89315	2.71164	2.73777
VTA1	6.28371	6.38675	7.06086	7.10814	7.07494	6.66665	6.31108	6.67672	7.31165	7.03743	7.24547
C15orf38-AP3S2	6.85805	7.17007	7.94996	8.21094	8.21678	7.10811	7.24615	7.65731	7.97458	8.28557	8.58487
CPSF3	4.42605	4.56557	6.98137	6.72937	6.62827	4.9881	4.16722	4.55755	6.26037	5.79185	5.33282
SPDYE2	4.84456	4.9424	4.58678	4.66483	4.55973	5.21211	5.24515	5.37091	4.86063	4.64114	4.3976
MRPL22	5.29723	5.20474	6.29398	6.34438	6.68455	5.13805	5.22036	5.54758	6.13789	5.92512	6.03125
RPL6	9.40634	9.38228	12.0729	12.0907	12.0757	9.24514	9.09411	9.56086	10.179	10.3799	9.78423
PLEKHG3	6.5651	6.80752	4.19895	4.46861	4.57396	6.21549	6.75723	6.28802	5.61966	5.58716	5.66148
---	3.03325	2.73772	2.3259	2.67381	2.68153	3.19692	3.08087	3.06876	2.58814	2.17169	2.36251
FCHO2	7.29289	7.34031	4.94521	5.56855	4.98642	7.68586	7.81916	7.68211	5.85451	6.60669	6.9648
TBCK	4.5676	4.43492	6.52873	6.89723	6.79512	4.15735	4.43519	4.64734	6.63296	5.31743	5.54571
ABCD3	3.00395	2.31675	3.1443	3.46545	3.58763	2.77908	2.49065	3.07277	3.78056	3.66431	4.0185
RSRC1	5.0337	4.73873	6.00911	5.85814	5.8273	4.55482	4.36528	4.81504	5.32484	5.16738	5.3347
LCN2	7.0439	6.062	4.84823	4.01545	5.56617	7.28637	6.75385	7.76309	9.31156	9.42844	8.89249
MTURN	6.07761	6.11207	5.17404	4.92705	5.29013	6.05546	6.16875	6.09784	4.57486	5.53394	5.16516
---	4.49049	4.17163	6.15266	6.32987	6.3044	3.76749	3.98587	4.23217	5.39517	4.55007	5.07954
RPL6	9.64044	9.61787	12.2187	12.1733	12.2082	9.48261	9.28124	9.7839	10.3519	10.578	10.02
DNAJB4	2.9904	2.90998	4.31813	4.22566	4.06598	2.83415	2.83291	2.57149	3.46396	3.47664	3.20352
---	7.31372	6.95188	6.44825	6.17532	6.23147	6.8581	6.68205	7.21653	7.63546	7.87357	7.65782
---	5.04502	5.46194	6.80802	6.36049	6.5026	5.08246	5.28806	4.57448	6.19221	6.156	5.73706
GSR	7.9086	7.86119	7.76407	7.4036	8.07321	7.68415	6.93173	7.53299	8.99529	8.14303	8.90105
SOD1	6.92132	7.01109	9.65338	9.70086	9.76524	7.00233	5.96527	7.07853	8.71992	7.98754	7.7454
PSMG2	6.28131	6.00339	8.57118	8.64629	8.22847	5.63305	6.01406	6.27927	7.35531	6.71803	6.92561
---	4.48573	4.14972	3.7244	3.40486	3.8639	4.4017	4.45156	4.47296	5.07034	5.11049	5.42928
FAM111A	6.62111	6.95631	6.87781	7.29068	7.14051	7.07783	7.34181	7.03092	5.86242	6.54481	6.26036
ITFG1	7.08199	7.02747	8.12525	8.28872	8.00855	6.82356	6.96806	7.15515	7.98957	7.46554	8.28025
RAB6C	5.82618	6.07913	6.83465	6.76064	6.7488	5.82797	5.50838	6.18036	7.24396	6.48289	6.84293
KRR1	4.47889	4.56443	5.76976	6.13023	6.0868	4.70027	4.55028	4.57792	5.43528	5.59187	5.06418
NUP37	3.83907	3.84682	5.52701	6.14721	6.04697	4.20815	3.5426	4.13033	4.92693	5.45645	4.86032
---	6.06816	5.98778	8.30065	8.35277	8.40614	5.86103	5.73196	6.09311	6.84113	6.95683	6.32546
SNORD50A	9.63723	9.81989	7.74516	7.87213	8.2873	8.53372	9.0321	8.4635	7.8574	7.84891	7.5075
MFN2	7.43141	7.40957	7.32771	6.82717	7.1435	7.30201	7.94225	6.88917	8.49178	8.37396	8.84226
BLOC1S1	8.68504	8.51912	8.63686	8.58787	8.74203	8.70434	8.73368	9.09051	9.93324	9.30876	9.84008
RTN4	7.99835	8.04957	8.07663	8.05632	7.92164	7.90996	7.98316	8.16141	8.58296	8.61495	8.48517
DYM	6.15047	5.97824	7.68202	7.33089	7.65935	5.92727	6.14779	6.32147	7.24693	6.71977	6.89757
METTL9	8.67098	8.76406	9.34484	9.24123	9.32782	8.66454	8.6049	8.77562	10.2033	9.13758	9.94524
PSMD5	3.5703	4.04381	4.71107	5.41377	4.95244	3.77008	3.15851	3.7357	5.69887	4.39715	5.20908
---	6.12502	7.26076	2.71093	2.83071	2.86484	6.5226	6.64006	5.77638	4.03283	4.67772	5.18288
MPV17	6.07894	5.94738	9.23395	9.26664	9.23798	5.94504	5.91727	6.52092	6.92152	7.08176	6.77414
ERMARD	2.9971	3.61074	5.12264	5.40358	5.3562	3.23744	3.08646	3.55205	4.29459	3.97416	4.47504
NDUFA5	4.59177	4.6575	5.91254	6.03495	6.16827	4.31219	4.31219	4.39731	4.78501	5.1348	4.90164
RPS3A	9.74947	9.71031	11.771	11.7641	11.5944	9.13204	8.83091	9.51243	10.1643	10.1297	9.75578
ITGA5	9.66149	9.61484	8.79415	8.80125	8.85189	9.43393	9.66276	10.2544	7.74949	8.77992	8.79256
MFNG	7.18096	7.08451	7.70025	7.66104	7.99945	6.99611	6.86495	7.44473	5.9747	6.44179	6.28208
CACNB4	5.15473	5.83298	3.93725	4.09693	4.25755	4.83959	4.76553	5.19514	4.10049	4.07453	3.9452
ATP5E	8.65184	9.04495	9.46295	9.40698	9.42226	8.77494	8.69011	8.58027	9.55801	9.21429	9.28183
BEST1	8.95067	8.83197	6.46448	6.75636	6.89903	8.95423	8.87823	9.20121	7.82512	8.36772	8.31424
KPNA3	4.42896	4.59061	6.12269	6.05179	5.66558	4.16947	4.10407	4.37472	5.67907	4.86562	5.08067
SEC31A	6.49629	6.55123	8.19165	8.32835	8.20709	5.43348	5.81843	6.08962	6.6871	6.95712	6.37303
POLB	8.80266	9.20932	7.60929	7.719	7.65267	9.14818	9.55355	8.97222	6.08583	8.35135	6.88338
ZCRB1	4.79296	4.91251	6.47534	6.27273	6.19944	5.37644	5.16136	5.41644	5.91945	5.81641	6.02543
COX1	9.73504	9.39687	11.7895	12.0168	11.9377	8.97376	8.99229	10.1224	11.5966	10.6181	10.6367
GBAS	5.24759	4.84154	7.80847	7.92242	8.0952	5.33782	5.54227	5.7732	7.25993	6.40573	6.37068
FCF1	4.81839	4.92037	6.01084	6.04018	5.93135	4.74327	4.70606	4.47574	5.59032	5.04463	5.70088
HUS1	5.40971	5.74246	7.29384	7.41304	7.29861	5.35297	5.01508	5.44167	6.64685	5.81903	6.26881
TNFAIP8	5.40523	5.18253	5.92401	5.77083	5.85803	5.50533	5.13124	5.3712	6.15809	5.80333	6.36149
ZNF830	7.58243	7.70293	6.52123	6.27587	6.45966	7.21462	7.85444	7.74788	6.25505	6.9237	6.71702
GAB2	8.24806	8.19173	6.51943	6.91323	6.70473	8.24517	8.42659	8.45654	6.93011	7.69508	7.65695
HIST1H2BM	5.51014	4.86832	5.00511	5.93883	5.83879	5.14299	4.88256	6.3623	7.09152	9.08594	7.66444
SPDYE2	5.03033	5.12079	4.67731	4.77537	4.67399	5.27595	5.31467	5.4103	4.9586	4.72018	4.59471
METTL7B	4.87709	4.99955	4.61286	4.51808	4.89986	5.33816	4.79584	4.67572	7.39928	5.67439	6.95066
TGFBR1	7.28383	7.27213	6.59213	6.7112	6.89224	7.26635	7.41202	7.78703	9.08997	8.23095	8.32508
HSPA9	6.56355	6.95401	7.78336	7.58488	7.80404	5.87059	5.54796	5.63566	6.35396	6.63352	6.27276
SGMS2	3.71121	2.9786	7.12157	6.87501	6.43363	3.72507	3.6102	4.15128	6.40578	4.68736	6.28894
IGFBP3	4.96736	4.78892	4.19592	4.31548	4.3383	5.08474	5.14431	5.11768	4.62888	4.66693	4.43203
OXA1L	7.71367	7.51075	9.42458	9.33695	9.68963	7.32812	7.53746	7.56457	8.0829	8.21347	8.03727
DCAKD	5.65997	6.23801	6.97909	7.12505	7.61851	5.10058	5.57895	5.79424	6.57879	6.6097	6.4968
LRRC6	6.58878	5.8879	4.35642	3.42199	4.1116	7.10375	7.52629	7.62421	5.95629	6.46034	5.64066
RPS3A	9.55122	9.53178	11.6545	11.6169	11.4551	8.95955	8.68588	9.33348	9.96089	9.92	9.56573
STARD7	5.38129	5.87205	8.28686	8.21922	8.07293	5.43084	5.33023	5.53229	6.67616	6.55262	5.92488
ANXA6	5.53288	6.09675	7.90033	7.09584	8.02666	5.35966	5.72943	5.8546	8.08974	7.17924	6.69728
HIST2H4B	7.46112	6.79307	4.28945	4.91583	3.93955	7.15161	7.51173	7.66894	4.87398	6.02909	6.24147
HIST2H4B	7.46112	6.79307	4.28945	4.91583	3.93955	7.15161	7.51173	7.66894	4.87398	6.02909	6.24147
AIM1	5.89448	6.22491	6.33252	5.93705	6.23114	5.88762	6.01428	6.1154	6.68567	6.58104	6.8625
---	6.22795	6.12685	8.89864	8.80808	8.77111	5.99007	5.7545	6.21207	7.19297	6.87634	6.47366
IGFBP7	5.88044	5.144	5.93659	5.84621	5.85679	4.8876	5.21925	5.18423	7.07853	5.99269	6.12706
DNAJC13	6.12003	6.19909	7.09434	6.84812	7.02009	5.84818	6.2743	6.72838	7.55133	6.96567	7.81057
PRDX5	11.5356	11.2977	11.2956	11.0873	11.2853	10.9492	11.1649	11.3079	11.7222	12.1077	11.7355
DYRK1B	6.1886	6.28064	5.94839	5.89034	5.81865	6.47464	6.3753	6.47472	5.71451	5.9005	6.04759
PAN2	5.65614	5.37267	7.24653	6.95413	6.80904	4.71279	4.8794	5.27359	5.91414	6.33362	5.62274
---	8.32676	7.79764	11.7967	11.7193	11.6153	7.00292	7.11804	8.11328	8.63825	9.44182	8.56917
PRNP	6.45248	6.96147	8.40196	8.93422	9.16968	6.44885	6.10907	6.01528	7.84752	7.02766	7.33253
NOV	7.06843	6.57463	5.03179	4.81321	4.15334	6.24581	6.67077	7.05755	4.78858	5.75908	4.97713
MIR425	6.7892	6.54772	4.9607	5.2736	4.55514	6.50723	7.58826	6.53562	4.84966	5.77876	5.42963
---	6.13656	6.39263	6.61794	6.14893	6.295	6.17979	5.97399	5.72421	6.86747	6.86553	6.55993
TLK1	7.94382	7.94122	7.88794	7.97298	7.90144	8.07906	7.98379	8.43235	8.88786	8.65166	9.12195
---	5.95302	6.42075	9.8461	9.78168	9.8379	5.39968	5.48026	6.04828	6.94291	6.64415	6.32291
NACA	8.04513	7.85269	9.29079	9.24932	9.62722	7.84771	7.72652	7.88016	8.59916	8.36298	8.41222
CHMP2B	6.78229	6.5419	6.46164	6.39241	6.42169	6.2209	5.91991	6.63661	7.3448	6.90868	7.11256
CCSAP	5.99997	6.18796	5.7801	5.70486	5.95211	5.97159	6.09811	5.90341	5.2112	5.57237	5.30165
PSMA2	6.81439	6.52506	8.22723	8.07647	8.15845	6.79976	6.80174	6.62562	7.82148	7.61582	7.1617
RBBP8	4.27445	4.29484	5.56579	5.67415	5.66622	4.49388	3.92387	4.0677	4.79781	4.81638	4.93338
RIOK3	7.64536	7.66986	7.68162	7.7264	7.65826	7.51133	7.45211	7.62149	8.53021	8.04725	8.02541
RWDD1	5.95549	5.9878	7.27381	7.57656	7.44345	5.83319	5.68725	5.40933	7.31421	6.42742	6.40885
TNFSF8	8.10221	7.68313	9.16746	9.17616	9.09021	8.97898	7.90578	8.10979	6.53392	7.51241	6.63763
---	3.83907	4.53177	2.27368	2.83953	2.08991	4.90488	3.44097	3.56404	2.17349	2.28995	2.37398
TM7SF3	6.01695	5.89907	6.6662	6.80778	6.50329	5.81088	6.068	5.72214	6.78621	6.32235	6.98785
CDC42EP2	7.61395	8.09005	6.43594	6.50404	6.55356	7.47439	8.30921	7.77505	5.80509	6.95804	6.67311
WDR37	6.7985	6.86193	7.09379	7.12153	7.04025	6.78749	6.66276	6.83402	7.9691	7.2333	7.45742
TBCB	7.35064	7.26381	8.32273	8.11358	8.19361	7.36957	7.46055	7.71532	8.58673	8.28781	7.97284
ILF2	7.00566	6.98091	9.22456	9.13492	9.1488	6.07388	6.2541	6.19124	8.43616	7.4616	6.86332
TMEM164	9.41735	8.48096	6.8153	7.28238	7.11748	8.70239	8.34224	8.29257	6.76648	7.57178	7.24313
---	6.04366	6.30754	7.38261	7.32957	7.40364	6.00437	6.16701	6.51758	6.82263	7.04981	6.88977
DDX1	4.90398	3.82899	7.46366	7.36931	7.17016	3.72576	4.24938	4.503	6.03568	5.29113	5.36416
ATP2A2	5.50228	5.54996	8.33439	8.15132	8.35775	5.20376	4.93439	5.63042	7.08125	6.20278	6.06418
ANKRD36	4.50531	4.06465	6.14123	5.67464	6.31545	3.68087	3.93448	4.33208	4.80325	6.2627	5.54912
NDUFA6	7.15848	7.27173	8.8341	8.99377	8.95832	6.66285	6.28491	6.58653	7.84574	7.99064	6.96725
RPL21	6.92842	6.82988	9.4413	9.61287	9.50276	6.6825	6.58101	6.84039	7.64806	7.47645	7.09112
---	7.18272	7.16144	6.42915	6.23113	6.5103	7.00661	7.48485	7.00278	5.93126	6.04716	6.66801
EPRS	3.97147	4.03687	7.34358	7.02378	7.09612	4.26452	3.50002	3.91216	4.89834	5.05607	4.53575
UBA2	4.79379	4.58232	7.56526	7.77839	7.77133	4.61432	4.72829	4.97028	5.48359	6.01844	5.3408
HIST1H3A	8.1875	7.9846	6.0035	6.87261	6.69112	7.44143	8.72728	8.21026	5.84876	7.02846	6.3586
FAM25C	5.82753	5.62738	5.61757	5.52107	5.60095	5.55502	5.68821	5.78783	5.16925	5.19063	4.84277
HIPK2	6.37644	6.4592	7.00599	7.09347	7.21365	6.29214	6.21514	6.6206	7.43359	6.80705	7.46171
ZDHHC20	6.35142	6.0323	7.27991	6.97363	7.37687	6.29136	6.42736	6.12512	8.8845	6.98247	8.18735
UFC1	6.51252	6.57505	9.2097	9.31915	9.1167	6.10493	6.40248	6.82261	8.37475	7.31942	7.37957
MRPS18C	4.17098	4.77026	5.32752	5.53098	5.62017	4.48753	4.53206	4.83214	5.43028	5.30761	5.48081
LTF	7.53364	6.16217	5.28056	5.17125	4.90909	7.29527	7.38386	7.88702	8.81471	9.68965	8.85439
SMPDL3B	6.20361	6.09193	5.03109	4.92332	4.4936	5.95502	6.05439	5.61745	4.84299	5.30789	4.84998
RSBN1	6.40406	6.73371	6.27099	6.29221	6.26355	7.15198	6.91256	7.21583	8.22936	7.61373	7.79138
RPN2	5.96495	6.02526	8.46787	8.20022	8.23785	5.94348	5.47998	5.88414	7.02352	6.92613	6.24333
RPPH1	8.80556	8.82897	7.90164	7.59363	7.63856	9.47548	9.55987	8.95768	8.25038	7.81724	8.72967
CTSD	9.70475	9.45472	10.1488	10.5664	10.4596	9.3081	9.66956	10.1155	10.8784	10.3788	10.985
C10orf76	5.1404	5.31866	6.80247	6.70738	6.78934	5.39283	5.00313	5.28919	6.2367	5.79729	5.79483
ANAPC5	5.21745	4.97004	6.89295	6.70315	6.67112	5.02637	4.82502	5.24085	5.57951	5.82174	5.66574
FAM174A	6.73973	6.76732	4.49985	4.28796	4.01802	5.93813	6.27618	7.01656	4.95063	5.58985	4.90675
PPTC7	7.64058	7.51551	7.14092	7.33643	6.84396	7.07603	7.45088	7.80014	6.10086	6.74039	6.46516
ND4L	8.59124	8.29181	10.3107	10.3134	10.2982	8.04461	8.15467	8.87709	9.8985	9.02158	9.68955
GSKIP	3.05245	3.80973	3.13595	2.81485	2.88357	3.33429	3.22024	3.47221	4.35165	4.3675	4.01299
TMEM9B	6.18297	6.4017	7.32478	7.75582	7.32951	6.20348	5.92577	5.91943	7.06144	6.93136	6.52389
RPS15A	8.36433	8.18833	9.78612	9.78739	9.81924	7.97054	7.539	8.29462	9.35944	8.79809	8.63928
PRDX6	7.35665	7.84477	8.389	8.39302	8.50785	7.53975	7.6147	7.61043	8.30561	8.07184	8.51166
POLR2G	8.17769	8.21919	9.56031	9.75835	9.52494	7.87084	7.96523	8.16777	9.2068	8.60164	8.58904
GBP4	5.50152	6.03404	5.34388	6.34248	6.168	6.39975	7.66489	6.49472	3.92538	5.70502	4.24752
---	10.7266	10.5267	12.5905	12.7228	12.6887	10.3028	9.96925	10.6011	11.2718	11.3069	10.8157
SNORD42A	5.2491	5.79906	5.23476	4.71982	5.22045	5.95755	6.85284	5.78857	4.7102	4.88932	5.14502
MAST2	5.21121	5.18483	5.35425	5.51531	5.59795	5.28505	5.02779	5.13666	5.82494	5.57055	5.76286
---	3.32787	3.43578	2.56088	2.65786	2.8128	3.61563	3.49056	3.13706	2.75336	2.86532	2.57922
NLRC4	6.36557	6.42626	7.30476	7.02246	7.06808	7.13636	7.29574	7.08832	8.85521	7.73299	9.36781
MARCH8	7.72777	7.69056	5.36615	5.842	6.1242	7.87261	7.62209	8.05743	6.34119	7.20237	6.68183
ATXN7	8.69394	8.76405	7.5986	7.60052	7.49637	8.81452	8.9677	8.82327	7.89314	8.23809	8.46659
NDUFS6	7.73002	7.95511	9.76773	9.55998	9.65717	7.75003	7.42465	7.58952	8.44715	8.31416	8.02112
GYG1	5.65057	5.2992	6.66784	6.53973	6.47679	6.81779	6.54168	7.26024	9.91789	7.64773	9.41674
ETHE1	5.61027	5.66949	7.91937	7.7966	7.58698	5.68985	5.85789	6.24559	6.95276	7.23075	6.45704
---	9.31295	9.0513	10.4529	10.4493	10.411	9.04207	9.16084	9.35886	9.99535	10.2952	9.62038
GCLM	4.7856	4.09565	3.85651	3.96724	4.14206	4.54794	4.35613	4.69665	5.7852	5.1282	6.06449
YWHAQ	7.68896	7.21471	9.18379	9.14896	9.29327	7.53375	7.21169	7.801	8.67085	8.15601	8.3546
---	5.27253	4.56691	3.66133	4.01576	3.54105	5.26517	5.05548	4.54639	3.71861	4.15428	3.46424
---	5.87583	5.67765	5.93647	6.66383	6.26419	5.37911	5.50529	5.52613	6.5473	6.06665	6.39509
ZNF260	3.14286	2.73016	3.86712	4.04999	4.26015	3.02287	2.78746	2.96193	4.03156	3.80828	3.43125
PGK1	8.13493	8.28947	8.20254	8.10226	7.93629	8.03978	7.93946	8.39593	9.3223	8.84703	8.69952
KMT2A	6.17737	6.156	8.21069	8.29711	8.12348	5.79121	5.65142	6.00199	6.58624	6.78762	6.22029
---	7.20394	7.66587	8.83133	8.72851	8.74993	7.1951	6.91814	6.75899	8.53624	7.59	7.88714
QARS	6.68366	6.90215	9.5718	9.47605	9.61688	6.54473	6.52478	6.9084	8.11913	7.70045	7.14817
FAM63B	5.1631	5.51619	5.35074	5.03381	5.67138	5.39489	5.30937	6.01466	7.01311	6.31014	6.79892
EGLN1	7.86028	7.58537	6.22999	6.24292	5.90664	7.84959	8.05363	7.92811	7.30383	7.16853	7.43879
HDAC1	6.91132	6.65963	6.95604	7.16452	7.20049	6.63565	6.5552	6.89515	7.61369	7.45127	7.15165
RPL14	8.56688	8.67639	11.1777	11.2505	11.0398	8.35517	8.46089	8.54555	9.1557	9.32842	8.82568
ERV3-1	8.30832	7.87889	5.5687	5.18452	4.80174	7.39672	7.6757	7.81624	6.58724	6.89042	6.54816
PARP6	6.80666	7.31251	8.28753	8.34894	8.23529	6.88755	6.86729	7.30543	7.70868	7.69963	7.88218
USP47	4.27347	3.77316	5.5431	5.40489	5.20098	4.10278	3.70878	4.36967	5.55812	4.79425	5.01828
KIAA0196	5.32648	5.57432	6.77519	6.76945	6.98828	5.24676	5.23459	5.6043	6.38675	5.80314	6.31603
RPS3A	6.57039	6.97021	5.80867	6.06119	5.75616	6.62202	7.09693	6.16816	5.55729	4.41568	5.57396
CIDEB	6.1959	6.32163	6.94963	7.15388	7.11135	5.68738	6.24804	6.63994	6.87287	7.45626	7.39258
RPF1	6.7073	6.57367	8.72324	8.62846	8.71939	6.80175	6.62392	7.08297	7.48583	7.34524	7.48008
ENPP4	3.36554	3.46477	3.55001	3.56489	3.54407	3.78022	3.55512	3.99816	5.15532	4.32405	4.54966
PSMD11	6.87756	6.56894	8.08287	7.60761	8.10281	6.39673	6.42211	6.51802	7.60855	7.05551	7.16506
KIAA0125	6.36004	6.14971	5.55131	5.69619	5.8121	6.82173	6.46762	6.37583	6.01439	5.87747	5.56348
PSMD9	6.58534	6.55538	6.95413	6.96559	6.84307	6.42992	6.15178	6.59797	7.45217	6.94198	6.98651
---	5.26824	5.25894	5.01135	5.21606	5.40576	4.95859	5.00493	4.8401	5.56783	5.37301	5.72402
PDLIM1	4.81845	4.97774	4.4013	4.48057	4.10941	4.33685	4.76114	5.11673	3.84181	3.8344	3.9928
GKAP1	4.55826	5.03879	3.69284	3.6762	3.94752	5.43431	4.6498	4.87938	3.56879	4.3267	3.73028
RCHY1	4.93877	4.76594	5.1498	5.16266	4.98319	4.42481	4.83612	5.24063	6.37755	5.4848	5.90548
SCAP	8.51693	8.5306	7.24575	7.35241	7.25636	8.15793	8.13396	8.8804	7.45594	7.53431	7.6804
RSU1	6.83337	6.88139	7.64369	7.91659	7.80088	6.99459	6.32196	6.96528	8.39827	7.52614	7.63979
RPS6KA5	7.96749	8.51504	5.75223	5.94615	5.43483	7.61161	7.97012	7.98736	4.0035	6.7931	5.56578
TROVE2	5.80394	5.8303	6.1746	5.92799	5.98304	5.55325	5.59562	6.02589	6.37001	6.36633	6.3464
USP14	4.02045	3.7756	6.55424	6.42912	6.37993	3.60331	3.7973	3.82653	5.72197	4.77969	4.39476
HCG27	6.82481	7.06469	4.45402	4.29229	4.87646	7.66882	7.60445	7.51803	7.03823	6.68753	6.2419
SNX14	4.89411	4.78036	5.57911	5.64793	5.78505	5.1193	4.83431	5.13295	5.96445	5.66219	5.47515
LPIN2	7.81292	8.00426	5.72404	5.87146	5.87809	8.1568	7.90147	7.82126	5.61833	6.76643	7.20282
TMEM230	8.19682	8.37733	9.56148	9.83311	9.67051	7.80985	7.8777	8.06934	8.82748	8.51718	8.38462
DOT1L	5.71002	5.53442	6.45992	6.12187	6.28126	5.65777	5.64887	5.36235	6.51896	6.46056	5.97509
SLC16A6	6.90353	7.43095	6.52016	7.39031	6.78943	7.02919	7.29682	7.01535	8.48514	7.83238	8.40809
SAMM50	4.38753	3.99596	7.03232	6.69252	6.76047	4.04247	3.83083	4.27438	5.67382	5.50149	4.55811
EFHC2	5.63386	5.03323	3.08859	3.15599	3.19461	5.85723	4.62649	6.29349	3.73533	4.19377	4.09335
BCL9	5.90579	5.93541	5.29603	5.09813	5.62428	5.24552	5.06859	5.52148	6.74801	6.24381	5.86161
SLC39A8	4.63101	4.50726	4.77255	4.91473	4.47653	4.55196	4.47952	4.28503	5.0267	4.99014	5.31434
KAT6B	6.30143	6.78661	7.24723	7.2227	7.09533	6.19598	5.69262	6.12032	6.80467	6.71082	6.71293
TMEM258	8.72627	8.9622	9.90239	9.76587	9.75394	8.7189	8.65197	8.94756	9.47183	9.25954	9.30335
VNN1	7.58162	7.57447	7.28634	8.24739	7.55348	8.56727	8.9016	8.20153	10.3139	9.39488	11.0203
CBX7	7.1367	7.06338	5.28071	5.64274	5.64318	6.56671	6.97496	7.03257	6.15056	6.22807	6.14466
TBC1D8	4.74583	4.94704	7.04284	7.30697	7.42169	5.17881	5.20016	5.8261	8.23813	6.11355	8.24045
ITIH4	5.36641	5.51636	6.36395	6.13231	6.48529	5.68677	5.77477	5.39043	7.86545	6.18788	8.00597
PHACTR4	6.20603	5.52099	8.54063	8.23778	8.31323	5.11829	4.58953	6.22609	7.21959	6.64398	6.86539
---	3.03449	3.18763	3.25813	4.21852	3.65922	3.04233	3.56377	3.60265	4.31275	4.44993	4.57387
AGPS	3.76914	3.05372	6.07706	5.37811	5.73175	3.62988	3.6716	2.9279	5.2861	5.0099	4.22574
MIR221	6.86072	6.78412	7.11646	6.65588	6.9999	5.08234	5.60794	5.85461	8.79077	8.11624	6.31139
TMCO1	7.789	7.79576	8.76758	8.97958	8.71038	7.6059	7.35014	7.74381	8.56366	8.26827	8.0271
IGF2R	10.3912	10.5207	7.44911	7.54781	7.39058	10.3781	10.3987	10.5871	9.04181	9.21545	10.0734
DRAM2	5.93324	5.67154	7.52754	8.10294	7.94218	4.92821	5.3966	5.54686	6.74364	5.88121	6.87035
RTCB	5.00922	3.82615	6.94139	7.65649	7.59467	4.30767	4.12913	3.88923	6.1345	5.2213	5.40865
TMEM183A	8.7138	8.8797	9.03174	9.03374	9.12181	8.38978	8.36759	8.53613	9.35879	9.12778	8.78779
PSMA7	8.50954	8.50723	9.07046	9.1094	9.23304	8.38904	8.16475	8.70605	9.05731	9.08811	8.9937
PTAR1	7.39915	6.98031	7.6427	7.51471	7.63768	7.36099	7.18745	7.6316	8.07234	7.95788	8.37076
TLR5	7.02278	6.53974	8.51452	8.19713	8.29405	8.50464	8.27528	8.82992	10.1825	9.08225	9.98998
PPP1R15B	11.3222	11.3481	9.84639	9.90262	9.74469	10.6699	11.2475	11.0044	10.1139	10.4745	9.75729
RANBP2	6.20055	6.73734	6.83138	6.78982	6.64741	5.97537	6.168	6.05823	7.07267	6.58109	6.7995
ZCCHC6	9.58703	9.57026	7.32019	7.29775	7.56994	9.55266	9.79275	9.57006	7.92739	8.40809	9.17455
TRNAU1AP	5.37965	5.24655	6.31659	6.38878	6.29888	5.79946	5.06107	5.74991	6.6685	6.20772	6.36305
SUPT7L	5.28497	5.50219	7.52444	7.43403	7.33361	5.19523	4.86301	5.34984	6.18954	5.87551	5.63583
ADH5	5.25113	5.12028	6.04009	6.31326	6.29981	5.11321	4.89126	4.82603	5.42352	5.64764	5.50401
RUNDC3A	4.15149	4.1308	4.11081	3.8662	3.77195	4.33814	4.2444	4.5556	3.81155	3.86843	3.7318
ZNF107	7.05131	6.61003	4.30011	5.04245	4.75753	7.59702	7.14558	6.54698	5.03868	4.98997	6.29261
SEC24A	5.70692	5.51715	6.01684	6.22176	5.70385	5.06646	5.45626	5.23841	7.17554	6.46902	5.86435
UPB1	5.67006	5.59656	4.30482	3.95216	4.24634	4.81404	5.08661	5.22589	5.63911	6.70078	5.97327
RPL39P3	9.81338	9.42483	11.4775	11.4201	11.4923	9.39001	9.14696	9.45645	10.2507	10.0559	9.77786
AKR1C2	3.08691	3.53767	3.47981	3.56344	3.77007	3.94808	3.82425	3.93603	2.9536	2.91905	3.47612
TOMM7	8.20971	8.03432	10.0339	9.85392	9.73145	7.40543	8.04971	7.39915	8.81557	8.23036	8.52994
SNX4	3.28787	3.26888	4.80805	4.84138	4.83859	3.15911	3.11454	3.28886	4.26849	3.52742	3.99553
DNAH7	2.8171	2.95409	2.67897	2.45738	2.48156	3.02562	3.09738	3.04175	2.54569	2.57743	2.60201
RPL17	8.21758	8.39825	10.5483	10.5039	10.5233	8.12846	8.07758	8.40983	8.98238	9.20685	8.59265
C14orf178	5.00931	4.88005	4.66561	4.78921	4.76621	4.94311	5.23763	5.29997	4.4188	4.68916	4.62657
ADSL	5.79748	5.23342	7.873	7.7062	7.89921	5.32659	4.99445	5.65275	6.83244	6.97649	5.8937
HIST1H4D	6.20835	6.7203	5.21291	5.43823	4.81664	6.64588	6.51524	6.22396	5.15048	5.14086	5.87493
RPS3AP47	9.71384	9.60615	11.6921	11.5362	11.0935	9.06762	8.82829	9.46075	10.0935	10.0787	9.78951
HSD17B12	4.0502	4.21134	4.67838	4.74086	4.37094	4.07231	4.21565	3.70335	4.74644	4.68748	4.62269
MAML2	7.56227	7.70909	7.13005	6.75548	6.90979	6.74399	7.55847	7.50368	4.23951	6.38625	5.41476
CYB561	4.53854	4.86508	3.93523	4.31319	4.03952	4.15528	4.71262	4.45151	3.5844	3.82248	3.649
POLR2K	6.08914	6.34618	7.86791	8.01968	7.31963	6.25256	6.57113	6.29338	7.14697	7.25934	7.11748
---	3.63938	4.40936	7.29702	7.14862	7.56442	4.50763	3.97974	4.51719	6.83762	5.25335	5.70713
SELT	10.5541	9.89421	10.6636	10.6036	10.6076	10.3478	10.1533	10.8433	11.5684	11.3111	11.2226
GADD45A	6.38154	5.94785	5.51145	5.70506	5.59418	6.63288	6.20108	6.44481	9.94267	7.16853	9.61286
CATSPER2P1	4.49124	4.36917	4.14569	4.31898	4.14147	4.30631	4.3862	4.19339	3.60488	3.92291	3.72573
CHMP1B	8.51632	8.63549	7.77363	8.16008	7.66765	8.43812	8.5402	8.74985	7.92661	7.88199	7.97881
CAST	7.03199	7.78017	9.10308	9.35699	9.12908	7.26215	7.42723	7.96873	9.32583	8.30409	8.77721
SNORD32B	5.93744	6.38946	5.2457	5.40213	5.35102	6.2455	6.42591	6.0172	5.67877	5.47475	5.52536
ACSF2	4.19342	4.03946	4.93733	4.29244	4.77576	4.25696	4.49593	4.0047	3.47045	3.33141	3.54264
FBXW2	6.11458	6.19257	6.71201	6.61744	6.52968	6.30125	5.687	6.45411	8.99465	6.82418	8.45495
ZHX1-C8orf76	5.69497	5.58287	6.35548	6.62348	6.53124	5.35534	5.05402	5.45132	5.99538	5.77812	5.89361
RAB2B	5.28227	5.30115	5.55402	5.42479	5.46693	4.79857	4.83867	4.64005	5.30936	5.45834	5.11278
MVB12B	5.14926	4.98159	5.27975	5.31073	5.76386	5.17463	4.74117	5.19723	6.17878	5.6659	5.79925
BNIPL	5.75458	5.98898	4.35886	4.83649	4.97961	5.84617	6.12243	6.50333	5.19214	5.3065	5.36238
XRN2	8.22671	8.13644	8.25758	8.32687	7.95437	7.44726	8.0475	8.35446	9.30058	8.75922	8.82027
C1orf123	7.12973	7.38031	8.27174	8.45805	8.52241	6.52447	6.65946	6.99714	7.42296	7.27049	7.4329
---	3.34051	2.90328	2.52059	2.85919	2.45743	3.97435	3.18293	3.04955	2.30585	2.49683	2.33229
---	7.79812	7.91434	6.0989	5.48975	5.99637	7.57215	8.45724	8.38772	6.9331	6.5374	7.34493
ARHGAP17	5.03997	4.98612	7.11644	6.99845	6.73986	4.7545	5.04168	4.88033	5.43971	5.45857	5.46537
PITRM1	5.66674	5.57137	7.58716	7.89145	7.56353	5.57805	5.99241	5.77649	6.72296	6.20114	6.83043
TMEM184B	7.24457	7.51172	5.89915	5.87558	5.69525	6.83184	7.38549	7.33168	6.21792	6.62322	6.43137
PTGER4P2-CDK2AP2P2	5.69063	5.52216	5.29478	5.47331	5.27449	5.96901	5.89384	5.96734	5.41524	5.56628	5.30729
RAB14	7.47596	7.30152	7.61606	7.71289	7.5245	7.49078	7.36437	7.60182	8.26666	7.96875	7.93754
PROC	5.4738	5.57514	4.93695	4.65053	4.75051	5.31656	5.28916	5.35825	4.59	4.93695	4.77798
FRY	9.12431	9.10675	7.53232	7.54954	7.34484	8.55329	9.02587	8.88279	6.85711	8.06494	7.94749
---	6.8835	6.98003	9.62521	9.52679	9.56205	6.75463	6.3641	6.70764	8.02814	7.56106	7.05062
RPL39	9.78388	9.41235	11.441	11.3808	11.4597	9.37364	9.11952	9.43636	10.2215	10.0078	9.74759
ASPRV1	4.99839	5.65334	3.91437	4.65737	3.99323	5.95416	5.69913	5.44007	3.92194	4.91739	4.44886
AOC3	5.86167	6.03307	3.73377	4.09453	3.84041	5.72454	6.28138	5.62534	4.1182	4.72359	5.26383
DGKA	8.12646	8.04936	7.84742	7.84886	7.70514	7.72041	7.91997	8.06906	8.72532	8.26484	8.65163
KIAA1551	11.8209	11.8024	9.07763	9.04882	9.0976	11.8833	11.6947	11.8871	9.9146	10.9021	11.2063
HNRNPH3	7.58186	7.6378	7.10519	7.27632	7.20499	7.35495	7.59339	7.32607	6.73864	6.89439	7.02241
ANKRD27	5.48461	5.57445	5.53934	5.80353	5.62887	5.25265	5.53755	5.32392	5.92709	5.85407	5.90707
SETX	8.1073	8.31227	7.23882	7.31597	7.45217	7.76822	8.13167	8.10159	6.62869	7.34265	7.39925
PLEKHO1	7.4326	7.58221	7.67015	7.53464	7.45236	6.6784	7.51939	7.3152	4.09957	6.44582	3.88545
GCM1	5.60687	5.37099	3.79109	3.78955	3.47084	5.39533	5.90803	5.39576	4.0552	5.04281	4.46476
NDUFB5	5.22051	5.21085	7.99667	7.88556	7.8105	5.11832	5.0432	5.62652	5.96538	6.02937	5.8264
HIST1H2AG	6.61035	5.60087	6.13968	6.66365	6.50999	5.9535	5.93573	6.55671	7.31134	7.10878	7.88629
GRAMD1C	5.98395	6.06414	3.24246	3.71868	4.0253	5.60135	5.00223	5.49262	3.86879	4.763	3.85873
PCGF5	5.2798	5.17574	5.0098	5.45194	5.50341	5.47729	5.93495	5.83563	4.78915	5.2352	4.49536
KRTCAP2	5.21313	5.49554	6.65772	6.8366	6.56303	5.00762	5.45721	5.56314	6.41376	6.34514	5.82133
ZUFSP	3.24521	3.4793	4.6124	4.5579	4.36253	3.29063	3.06218	3.26683	3.97436	3.74891	3.65542
CTDSPL2	6.54884	6.76274	6.83137	6.82702	6.93334	6.25856	6.30221	6.39322	5.78913	5.85066	5.90085
ATP5H	7.11112	7.46883	8.51956	8.46618	8.66297	7.32996	7.09562	7.28403	8.32085	7.8021	7.77543
C16orf70	5.84728	6.17021	7.75704	7.57524	7.62253	6.48024	5.61523	6.4435	7.285	6.90518	7.84009
PPM1M	8.07584	7.86826	8.10062	7.97701	7.79084	7.43748	7.90992	8.20992	9.35572	8.42953	8.96433
TAP2	8.33441	8.86179	7.15017	7.77341	7.50164	8.31866	8.76374	8.5178	6.85919	7.77436	7.6066
SNUPN	4.60989	4.73722	6.33185	6.2378	6.4644	4.25154	4.58941	4.62311	5.25372	5.25242	4.88879
POLE4	5.41899	5.25991	8.41415	8.20611	8.03942	5.6924	4.5539	5.93777	7.27701	6.80365	6.389
SBNO1	6.71864	6.56797	6.38194	6.46929	6.09733	6.34181	6.17966	6.64085	7.45197	6.83597	7.27454
LTA4H	6.70777	6.84035	8.82948	9.0224	8.91329	6.83742	7.20205	7.78909	7.86052	9.08888	8.87544
BNIP2	7.1869	7.09612	7.80205	7.75916	7.61737	6.77707	6.635	7.43025	8.71955	7.71521	7.85805
PFDN1	4.56781	4.43132	6.48603	6.32892	6.17416	3.93985	4.13641	4.03765	5.12698	4.57362	4.55304
RPS13	8.197	8.70045	10.6987	10.9006	10.6008	8.05184	7.68014	7.87077	8.93814	9.10477	8.32728
FBXO7	6.59388	6.98054	8.39261	8.61524	8.29742	6.57265	6.70134	6.91326	8.12929	7.4278	7.35198
AK6	4.66033	5.00297	6.64153	6.61081	6.53543	4.59023	4.64578	4.43347	5.68663	5.27131	4.97792
METTL20	3.48458	3.69157	3.49843	3.52574	3.22372	3.16359	3.54131	3.27315	4.11423	3.96803	3.80137
---	3.35894	3.24011	3.04847	2.83303	3.24783	3.32947	3.44379	3.19907	2.64387	2.86488	2.7127
NHS	5.9383	5.97816	5.55531	4.94891	5.34673	5.74799	5.71299	5.99795	4.94007	5.33288	4.88514
---	8.18224	7.851	11.8686	12.0165	11.9378	7.0185	7.0392	8.2693	9.33463	10.245	8.37263
EIF3E	3.64009	3.17482	8.43325	8.26455	7.80169	2.98588	3.24164	3.55289	5.79288	4.22205	4.44485
ARL6IP1	9.41813	9.48938	9.52465	9.44435	9.68526	8.57105	8.93918	8.93337	9.73606	9.23573	9.49264
ZNF8	4.6962	5.27247	4.50689	4.53815	4.45542	4.98703	5.34431	4.90282	4.37926	4.1163	4.47133
PUM1	7.25708	7.22441	8.43958	8.37592	8.31539	7.0651	7.07692	7.18168	7.95456	7.44076	7.67217
ARHGAP26	10.5245	10.459	8.99615	9.19936	8.90462	10.4531	10.5987	10.8017	9.8161	10.036	10.1792
SPDYE1	5.29913	5.58289	5.1639	5.0057	5.08519	5.55658	5.65629	5.85163	5.13111	5.21244	4.7027
RELL1	7.81776	7.78798	6.58154	6.51714	6.25108	7.92387	7.47398	7.72096	7.1808	6.87716	7.12882
AAK1	7.2493	7.29967	7.554	7.27119	7.53074	6.74302	6.8851	7.09403	8.59257	7.37803	7.97498
ATG2A	7.82791	8.45316	6.14449	6.03315	6.14661	8.17737	8.0609	7.81356	6.52461	7.54006	6.8129
TMEM183B	8.41667	8.55156	8.6641	8.75006	8.84074	8.10412	8.1107	8.22986	9.06813	8.81924	8.47571
SAR1B	5.21647	4.70369	6.49863	6.46152	6.88425	4.82306	4.75538	4.80685	7.53197	5.54981	6.30205
C14orf159	8.92437	9.2705	7.18804	7.05357	7.45957	9.05657	9.37343	9.21503	5.57222	8.12059	7.55193
YWHAH	8.01729	7.13761	8.75319	8.32161	8.53757	7.814	7.46145	8.04906	8.86201	8.52799	9.12896
YWHAE	10.4283	10.3956	11.6979	11.617	11.7272	10.0324	10.2336	10.2733	11.0843	10.5293	10.7928
RUNX2	6.41901	6.65853	5.46601	5.05806	5.40732	6.04938	6.70916	6.33781	4.9743	5.67266	5.59838
TAP2	8.13279	8.65944	6.94424	7.57255	7.28155	8.15371	8.62781	8.28851	6.67507	7.60935	7.42287
NKG7	7.48735	7.07695	6.02593	6.62525	8.90791	6.68949	6.71901	7.32524	10.6477	10.2627	8.62046
ELL2	6.34405	6.2861	6.00697	6.20644	6.06453	6.31388	6.13746	6.34666	7.17521	7.07262	6.575
TMEM63B	5.93234	5.84664	6.25773	6.14665	6.05636	5.486	5.24479	5.55203	6.08134	5.80417	6.358
---	7.35464	7.44435	9.81109	9.79982	9.62497	7.4289	6.79483	7.08278	8.21919	7.73575	7.70592
RPS7	5.18554	5.41383	7.07249	7.02862	6.9251	4.84161	4.64654	5.14679	5.57898	5.60189	5.34485
ETV3	8.4066	8.5228	8.43545	8.3079	8.52885	8.2875	8.44094	8.44939	7.76099	8.06056	7.74323
SARAF	9.51228	9.67317	8.9258	9.21787	9.05668	9.68539	9.24842	9.60314	8.95979	8.9632	8.77443
AGTRAP	8.47367	8.51705	8.79424	8.92283	8.85268	8.72635	8.58644	9.14867	9.27717	9.60424	9.58053
ATP1A1	7.00128	7.13337	9.26816	9.26649	9.26366	6.23304	6.49388	7.05249	8.91533	7.82948	7.34382
TCF4	4.00988	4.06771	5.17448	5.50123	5.09345	3.7847	3.77196	3.84582	5.52874	4.38854	4.63384
AFF1	8.6885	8.84049	7.8027	7.87643	8.01535	9.18863	9.4758	9.45716	8.49733	8.90541	8.87385
SLC25A40	5.94219	5.28378	6.95944	6.88547	6.38565	5.44499	5.58745	5.93001	8.08266	6.27107	7.68141
CPSF7	7.85572	8.04575	7.10452	7.22764	7.31444	8.02732	7.88164	8.37101	7.58526	7.49372	7.32346
ZNF746	8.82599	8.8002	7.59636	7.47209	7.64595	8.73964	8.63089	8.87802	8.02259	8.23831	8.37853
HIST1H4A	6.07517	6.23771	5.59561	5.87211	5.66036	6.12603	6.04394	5.74762	5.22928	5.56485	4.9881
TPR	7.6272	7.70527	6.5069	6.43403	6.47809	7.45744	7.63245	7.57254	7.06155	7.05271	7.20368
TTC8	3.01007	3.23219	3.27339	2.99415	3.05248	3.33493	3.02728	3.17907	4.17858	3.55	4.00238
PSMB7	7.2953	6.87909	9.22914	9.22991	9.22502	6.75413	6.95383	7.3268	8.51431	8.26762	7.46302
METTL5	5.04972	5.07151	5.75363	5.98455	5.5819	5.09248	5.11361	4.76936	5.75377	5.56937	5.49734
NDUFB8	6.97809	6.14975	8.6731	8.8974	9.17875	6.96443	6.5395	6.93036	8.22735	7.96319	7.47462
FAM107B	7.25398	7.25921	6.64646	6.71943	6.47337	7.35045	7.0426	7.55669	8.67693	7.74521	8.29278
FGD3	8.99714	9.02942	7.14149	7.14648	7.07783	8.986	8.92851	8.99714	8.11166	8.57337	8.53821
OR2T27	3.28127	3.18324	3.16325	2.98429	3.2491	3.69227	3.31493	3.65732	2.99919	3.04817	2.94262
SCARNA16	7.2088	6.4851	6.88745	6.33924	6.39919	7.79004	7.47969	7.83046	6.54577	6.98025	6.7989
SNORA57	8.11669	8.24573	7.64763	7.52888	7.30792	7.61112	7.95854	7.54016	7.04194	7.18724	7.07194
SPAG6	3.74577	3.85633	3.00727	3.40972	3.11131	4.22403	3.69553	4.40063	3.43724	3.25559	3.32082
DNAJA1	9.73748	9.74149	8.79393	9.10201	8.78175	9.30875	9.49541	9.23177	8.55799	8.98943	8.43854
BAIAP3	5.44932	5.93991	4.62591	4.58393	4.77046	6.23803	5.71882	5.68583	4.6764	4.93538	5.35103
ADIPOR2	7.10739	7.20797	7.75667	7.79885	7.89347	7.12688	7.21706	7.2073	7.66965	7.63984	7.54823
COX7C	6.94265	6.85841	9.58126	9.7793	9.97066	7.17957	6.48131	6.82418	8.51116	7.71228	7.50347
ADAM9	5.04756	5.55116	6.27232	7.1164	6.71169	5.6456	5.00782	6.06369	8.44421	6.46652	7.47477
HDHD2	4.47593	4.99199	6.85107	6.37824	6.35084	4.62874	4.54068	4.77574	6.67668	5.90743	5.24925
IAH1	6.22448	5.35374	7.76501	8.07427	7.85756	6.49833	5.74327	6.39838	7.45374	7.18152	7.13774
SNRPEP2	6.33108	5.80574	7.90831	8.21822	7.86949	5.9004	5.51818	5.92807	6.30763	6.81637	6.68175
---	1.86885	2.18676	2.49537	1.89173	2.00789	3.05362	2.91298	2.73239	2.16753	2.29164	2.02798
AMT	6.31465	5.65646	6.2477	6.42713	6.66352	5.4828	5.52482	5.32502	6.84318	5.9809	6.4233
PGM1	6.78751	6.7059	6.40865	6.35421	6.20748	6.54484	6.6827	7.3297	7.86664	7.39981	7.90605
CCDC146	5.77287	6.19747	4.70458	4.45274	4.5822	5.71542	7.23865	6.67206	4.93084	5.50922	5.13487
SNORA52	5.65955	5.82383	5.4879	5.74837	5.74357	6.33486	5.93254	6.00272	5.22658	5.47843	5.62578
---	5.73599	5.16233	7.4474	7.8488	7.84494	5.58199	5.60347	5.90296	8.00197	6.79696	6.4943
HBQ1	5.55531	5.72153	5.16909	5.14107	5.17716	5.76239	5.78045	5.8533	5.34043	5.4593	5.22834
LRRFIP1	11.2777	11.6301	12.0113	11.7611	11.8519	10.8765	10.9255	11.1792	11.8036	12.1239	11.4041
---	9.47601	8.90934	10.1352	10.1311	10.4153	9.52019	9.86961	9.6545	10.3777	10.2597	10.7164
OCR1	8.90185	9.10666	5.46318	4.93788	5.36014	8.10764	8.7578	8.03042	5.21509	7.48209	6.49729
HSPA7	7.17871	7.15579	6.3845	6.55567	6.14721	7.49442	8.06409	8.13729	6.57775	6.20865	7.4024
SSH1	2.21355	1.9889	1.95785	2.05304	2.33559	1.69328	1.91216	1.84743	3.4107	2.71861	2.31154
RERE	8.041	8.0621	6.80885	6.88366	6.93071	7.90026	8.35656	7.93173	7.12163	7.56881	7.50497
TMEM56	4.69791	4.47623	2.58924	2.31982	2.91512	5.70152	4.49497	5.39987	3.6617	3.59358	4.40543
SLC36A4	4.59752	5.08451	6.52754	6.49	5.85836	5.50886	4.8095	5.27824	6.81941	5.93742	6.29884
ZC3H7A	6.21139	5.94752	6.40559	6.50842	6.64598	5.81521	5.76787	6.21568	6.71551	6.36537	6.79697
ANAPC11	6.62737	6.87614	7.74226	8.10355	7.9165	6.20431	6.02057	6.72723	7.33536	7.12761	6.92399
TPX2	2.97309	3.25597	3.38529	3.21616	3.16531	3.46732	3.21224	3.85558	4.2657	4.05036	4.4565
NAA20	3.81054	3.60848	6.33884	6.5087	6.29152	4.29032	4.05477	3.92441	4.63556	4.71704	4.55556
ERP29	6.60209	7.05692	8.59075	8.11133	8.4828	6.91919	6.92828	6.89263	7.76649	7.91206	7.36615
RPL24	8.48034	8.1533	11.1296	11.1883	11.2198	7.87611	7.34026	8.33957	9.11209	8.92929	8.50434
---	7.89417	7.49933	6.23033	6.2119	6.34387	7.15458	7.48136	7.31475	6.37815	6.89145	6.64791
IDNK	4.60336	4.82824	5.24309	5.08822	4.90733	4.81736	4.88013	4.73394	7.5918	5.56132	6.17958
NOL9	3.585	3.53201	5.82303	5.55985	5.59571	3.60996	3.71764	3.5705	4.09776	4.09871	4.09154
ETFB	7.03431	7.11273	8.07208	7.66691	7.91404	6.7885	6.66267	7.26631	7.91795	7.82456	7.39413
HIST2H2BE	10.4076	10.1	7.24802	7.41089	7.53903	9.6039	10.3281	9.86641	8.60527	9.42603	8.84472
EMC7	7.09439	6.976	7.74179	7.94761	7.93634	6.84837	6.99723	7.41282	7.80464	7.56143	7.917
ARV1	4.95663	4.79477	6.24571	6.49953	7.16914	5.0079	5.17772	4.94954	5.83298	5.94025	5.8907
PLIN3	7.76359	7.88001	7.43101	7.70346	7.65679	7.59731	7.91979	8.12749	8.79299	8.54057	8.36452
KATNBL1	7.70955	6.88408	5.53241	5.61075	5.42001	7.39012	7.46681	7.74408	5.11498	6.75158	6.28636
RAD23A	5.08579	5.39185	8.01162	7.55233	7.8275	4.97195	5.06674	5.15217	6.51583	6.30926	5.44535
EXOC4	5.74289	5.62346	6.82596	6.82478	6.8344	5.53717	5.51836	5.46449	6.20583	5.87487	5.90477
---	5.94694	5.98304	5.49392	5.30358	5.51615	6.45222	6.1298	6.22644	5.87476	5.70251	5.66569
RAB32	7.19841	6.76652	8.07654	8.10191	8.22146	7.55935	7.37366	7.83882	9.05316	8.17897	8.33587
ATRIP	5.4844	5.57298	5.62159	5.54158	5.54423	5.62474	5.95392	5.80444	4.89945	5.43038	5.20831
CCNA1	3.44179	3.85388	3.15707	3.36767	3.42304	3.90185	4.22198	3.76797	7.51393	4.71467	8.35054
TTLL12	6.21323	6.86014	6.93465	6.84723	6.75175	5.78114	6.1072	6.55286	7.31225	6.99066	6.88722
CCT5	8.03099	7.78981	9.26447	9.12624	9.141	7.61944	8.10501	7.91906	8.49133	8.44145	8.43754
HSPA6	9.62512	9.93507	7.28971	7.34932	7.31559	9.8306	10.5959	10.3913	8.83146	8.91672	9.80197
CD99L2	4.8194	5.01845	5.91345	6.09516	6.0611	5.00054	5.23703	5.38207	6.27163	5.54126	6.40475
PSD4	8.3786	8.50955	6.71553	6.59797	6.94362	8.32733	8.57879	8.39699	7.35414	7.52215	8.0999
RAB33A	5.03128	5.27245	4.89991	4.85519	5.06363	5.04889	5.0865	5.06489	6.82895	5.66591	5.82583
GORASP2	5.94203	5.64966	8.39846	8.26046	8.10233	5.69189	5.84139	6.17089	6.49054	6.49214	6.58291
VPS11	5.60269	5.57855	6.97644	6.97399	7.30947	5.29098	5.36384	5.36316	6.68358	6.26709	5.70103
POLDIP2	6.30115	6.51965	7.00388	7.06299	7.15379	6.08478	6.1773	6.36059	7.06728	6.60558	6.74274
IP6K1	7.65449	7.42806	5.81695	6.1167	6.20578	7.76721	7.739	7.70376	6.23212	7.00089	7.20795
TMBIM4	8.8733	8.39472	8.5335	8.47311	8.47082	8.30765	8.43392	8.68432	9.1698	9.07879	9.01253
MGST3	6.16208	6.06603	10.0527	9.71828	10.5908	6.20202	6.44276	5.79064	8.39096	7.23003	7.03968
FAM231A	5.72479	5.27103	5.32917	5.32329	5.3781	6.21447	6.1847	6.13559	4.84698	5.56354	5.6391
EBAG9	5.07512	5.25241	7.08871	7.02731	6.92126	4.49209	5.10575	4.69212	5.72937	5.17993	5.78043
COX2	9.08138	8.88379	11.0706	11.0502	11.4163	8.40467	8.7744	9.48919	10.6084	9.66967	9.97427
SLC4A1AP	5.93485	6.21583	6.51208	6.45081	6.61682	5.89033	5.86324	6.13485	6.56949	6.37343	6.95351
FUZ	6.77401	6.9083	5.56794	5.55335	5.36981	6.78298	6.43606	6.8975	6.19121	6.0017	6.18023
PTMAP3	6.24208	5.95032	8.58258	8.1238	8.24404	5.43	5.41526	5.59083	6.04249	6.66698	7.59035
ANKRD22	5.88427	5.43738	4.83022	5.40197	4.92711	6.9277	6.88941	6.87866	9.31681	8.03333	7.67476
RAD51B	4.71045	4.19065	5.16425	5.61471	5.56385	4.38154	4.68621	4.41049	7.08175	5.01044	6.65647
ARID4B	7.96978	8.20871	6.50864	6.54547	6.2711	8.1406	8.03466	8.20673	7.42903	7.73082	7.59088
GOSR2	4.41651	3.94194	6.30958	6.53596	6.2295	4.27838	3.96005	3.86855	5.89188	4.56537	5.17372
TBCE	3.30637	3.60628	4.46219	4.80275	4.7052	3.24229	3.50163	3.38949	3.95476	3.99221	3.86101
SCAF11	7.11831	7.15938	6.66279	6.64686	6.74335	7.34925	7.55701	7.52264	7.03063	7.04615	7.06438
VPS37C	7.19759	7.32949	6.73103	6.38167	6.72668	7.00491	7.04616	7.22358	6.19738	6.63775	6.55657
VPS54	3.67132	3.67073	5.15459	4.49902	4.61243	3.94634	3.85157	3.87059	5.60199	4.30577	5.37857
---	6.42308	6.15517	7.30129	7.63166	7.22112	6.11634	6.65111	6.5126	7.31873	6.96293	7.17167
DAPK1	7.35056	7.26242	8.73056	8.90209	9.09844	8.00344	8.15295	7.77795	5.43936	7.17788	6.89393
GSAP	3.71198	3.23697	6.40962	6.1835	6.30804	3.70865	4.21128	4.84737	5.18609	5.79263	5.16892
CKAP4	7.62983	7.52953	7.1484	7.23088	7.34103	7.60761	7.27453	7.97996	8.30504	8.34882	8.22375
PTPN9	4.76047	5.06612	6.07627	6.70713	6.48723	4.62089	4.73094	4.8456	5.81118	5.27831	5.44438
LARP4B	7.21116	7.24149	7.56693	7.63316	7.79678	7.26121	7.17722	7.54223	8.1029	7.74454	7.85785
CALM1	8.53321	8.49012	8.35744	8.27273	8.3669	8.11573	8.24063	8.36407	9.19049	8.65169	8.71576
FGR	9.58176	9.58207	9.85834	9.94257	10.0256	9.86894	9.83334	10.4365	10.7412	10.5852	10.7903
IKBIP	6.79381	7.21961	5.59386	5.5209	5.80862	6.77667	7.27865	7.22635	5.7513	6.41405	6.44991
ERCC1	5.86597	6.12245	7.14567	6.95539	7.43379	5.9077	5.83838	6.71882	5.13531	5.3711	5.18235
NDUFAF1	5.43003	5.47232	5.74899	5.65747	5.69232	5.40231	5.27916	5.71213	6.16891	5.82748	6.44144
MAPK14	7.96319	7.73585	7.36281	7.02805	6.98468	8.09522	8.40599	8.73563	9.90019	8.84343	9.83078
HAUS8	4.56388	4.78523	4.26104	4.32085	4.27232	4.49992	4.7211	4.31381	3.95443	4.03811	3.98249
ATP8B2	4.40527	4.51847	3.94966	3.79686	4.21985	4.4423	4.93748	4.60417	4.19567	3.7994	3.91007
SAMSN1	5.89517	5.6158	5.54487	5.93488	5.90878	7.42531	6.11701	6.54401	9.10043	7.42441	8.6156
FAM212B	7.08819	6.89908	4.31385	4.80739	4.21785	7.00875	6.84951	6.90349	5.5929	6.25046	6.32795
CDK19	8.71258	8.58318	7.41939	7.09003	7.31118	8.40564	8.28053	8.63916	7.55005	7.91643	7.9642
PTPRCAP	6.3812	6.31971	6.02588	6.12435	6.22792	6.48725	6.58803	6.37169	5.63215	6.06094	6.0456
HECW2	4.43082	4.15965	2.93227	2.79252	3.25592	4.33599	3.88981	4.4379	3.49264	3.2544	3.64489
RPL41	5.14781	5.45484	4.75978	5.00124	4.87247	4.6214	5.58315	4.89485	4.1214	4.31363	3.91169
ZNF211	4.88704	5.01307	4.53995	4.74562	4.49722	4.73637	4.94069	5.00455	4.40743	4.43898	4.3666
RNF10	8.65526	8.71204	7.77157	7.67476	7.85152	8.82621	8.63572	9.18736	10.4494	9.27907	10.0566
RFXANK	7.09376	6.86379	7.18085	7.0416	7.4301	6.70338	6.74115	6.746	7.67658	7.44312	7.08473
FAM117B	7.58554	7.50405	8.4448	8.62087	8.76479	7.08054	6.44045	7.23681	5.39469	6.43488	5.12626
GCNT1	5.02674	4.80618	5.47654	5.85142	5.33789	4.60698	5.04687	4.88784	6.0125	5.42402	6.89021
---	7.53921	7.72581	9.45041	9.38864	9.158	7.18281	7.6684	7.3761	8.52164	7.93043	8.02181
ITPR2	7.2963	7.01455	6.93019	6.74082	7.09881	6.989	7.17736	7.09592	7.71258	7.80475	7.48407
PTGER2	4.5051	3.98217	7.20061	7.73608	7.01875	4.41577	4.8369	4.41359	8.44379	5.37502	7.03823
GGT1	7.05598	7.50036	6.86804	6.73374	6.71008	6.95711	6.76465	7.26148	7.76683	7.6289	7.55051
USMG5	7.25735	6.82773	8.20463	8.18169	8.03443	6.86782	6.91857	7.33326	8.03486	7.79834	7.51136
UBE2B	9.81833	9.7359	7.96073	7.90264	7.90363	9.81913	9.82024	9.8445	9.31676	9.46275	9.46685
RNF185-AS1	3.80628	3.90919	3.24782	3.50158	2.95406	4.04415	3.6539	3.67435	3.11032	3.26433	2.77836
LAPTM4A	10.4252	10.4129	10.7823	11.0937	10.7244	9.85904	10.1148	10.2448	11.0885	10.9623	10.4338
DUOX1	3.28058	3.34299	3.15857	3.35735	3.49766	3.81351	4.06959	3.69711	3.23262	3.4087	3.27735
SNORA38B	6.7891	8.26763	6.59694	6.47837	6.5185	7.85572	8.0196	9.47167	7.04226	6.09187	6.61825
HACD2	4.74754	5.1441	7.7684	8.1034	7.12761	4.50361	4.71015	5.15082	5.81925	6.47738	5.62636
ATPAF2	5.76648	5.72016	7.41992	7.08251	7.3544	5.61255	5.20042	4.70746	6.52514	6.09288	5.80117
ATXN7L3	6.51652	6.92311	6.02078	6.36461	6.1644	6.43436	6.20523	6.57449	7.22697	6.82638	7.31934
VPS35	6.07443	6.16054	6.96981	7.06902	7.22447	6.2389	6.22518	6.42711	7.46796	6.69099	6.94778
CYP2D6	6.4117	6.38592	5.99266	6.04021	6.00414	6.69702	6.69968	6.39722	5.43216	6.18225	5.98738
---	7.56612	7.37499	10.7512	10.7797	10.4751	7.00061	7.20351	7.7169	8.27811	8.34313	7.8055
RUNX1	7.11194	7.12422	7.61163	7.80832	7.68292	7.07373	7.20338	6.99371	8.46129	7.37947	8.28388
ANAPC11	6.73574	6.90844	7.8111	8.20705	7.99803	6.17306	6.04761	6.80038	7.4492	7.13384	6.97268
HOXD8	3.35469	3.40215	3.38306	3.09097	3.38552	3.57616	3.95479	4.13183	3.04309	3.33379	3.30927
PMAIP1	6.74649	6.66646	6.33854	6.29887	6.48453	5.88602	6.22545	6.06823	3.92569	5.68505	4.03241
SNRNP40	3.86375	4.03939	6.01743	6.19226	6.48714	3.42187	3.6231	4.33218	4.92672	4.72384	4.50613
YBX3	7.84903	7.32452	10.3649	10.3066	10.1309	7.49345	6.94816	9.22765	4.81949	6.0412	6.32666
NDUFB7	7.00024	7.15527	8.78473	8.62591	8.54712	7.30344	6.76034	7.22957	8.1601	7.72162	7.62616
TBC1D17	6.22631	6.45058	5.93337	5.90892	5.63851	6.34899	6.18149	6.28153	5.55652	5.73526	5.87803
PPP2R2A	6.96073	6.70375	5.70124	5.84017	5.9294	6.88111	6.88857	6.78164	6.17889	6.42353	6.42253
FKBP8	8.24282	8.57549	7.06047	7.26016	7.08466	8.3206	8.48787	8.68577	7.66178	7.57158	8.14196
COMMD3-BMI1	5.06305	4.61314	7.48142	7.24522	7.17417	4.96443	4.55167	5.29598	5.55662	6.37048	5.82913
VCL	6.13319	6.04273	6.59767	6.52868	6.59024	5.91221	5.92093	6.52785	7.22159	6.56579	6.99208
BTF3	6.52784	6.48097	8.06873	7.81178	8.02448	6.18277	6.48333	6.48455	7.16961	6.96055	6.76371
U2SURP	6.48994	6.40403	7.50059	7.83734	7.59358	6.37254	6.13367	6.35793	7.19828	6.68208	6.86981
GIMAP7	4.45201	4.33947	7.20982	7.00019	6.97794	4.32226	4.19078	4.47401	3.42324	3.75543	3.9553
GNPTAB	6.00113	6.2112	7.57914	7.46266	7.76225	5.40994	5.33648	6.0627	6.61324	6.47979	6.16351
VMP1	12.5221	12.3873	11.3194	11.3429	11.2558	12.5093	12.417	12.4692	11.5447	11.9405	12.1304
C2CD5	6.03723	6.73059	6.58648	6.70422	6.71272	5.84574	6.01948	5.72277	7.2115	6.30002	7.57235
---	5.23901	4.62239	4.98417	4.80515	4.61284	4.97624	4.99825	5.10909	5.5312	5.86767	6.36586
RICTOR	9.04039	8.91401	6.13034	6.51769	6.29936	8.80112	8.9839	9.03277	7.19187	8.47292	7.95556
---	2.8069	3.28186	1.92468	2.43836	2.23959	3.46136	4.04291	3.58087	2.22165	2.47179	3.19364
---	1.70966	1.94176	2.12183	1.92688	1.83587	1.79801	2.13836	2.00551	2.98525	2.8893	2.3107
CLEC4D	7.2475	6.57846	6.81998	6.79279	6.49138	7.69663	7.49166	7.41044	10.0472	8.30021	8.7301
APOL2	6.05385	6.3626	4.51306	4.94813	5.4246	6.56982	6.87775	6.19723	4.9368	5.86006	5.40235
LRRC40	2.88188	2.74477	4.28046	4.17654	4.18471	2.74389	2.82764	2.7394	3.63823	3.25465	3.11585
HS2ST1	5.1336	4.76131	5.39613	5.19872	5.64469	4.9018	4.33155	5.15905	6.70261	5.40505	6.04976
RPS20	9.85136	9.61941	12.4541	12.3903	12.4657	9.1353	9.33498	9.78871	10.3398	10.5364	9.8464
LOC285074	9.02528	8.99771	8.82454	8.54913	8.65623	8.70466	8.59824	8.9367	7.667	8.34643	8.11253
FAM71F2	5.84518	6.19248	4.75613	4.40936	4.34743	5.81836	5.92508	5.96806	5.3247	5.24268	5.40719
GGT1	6.20457	6.57388	5.93639	5.92156	5.83482	6.10587	5.92883	6.30396	6.80331	6.64554	6.58955
C6orf47	6.24606	6.26482	5.81667	5.99044	5.91075	6.47735	6.41449	6.57982	6.11956	6.02283	6.05569
C6orf47	6.24606	6.26482	5.81667	5.99044	5.91075	6.47735	6.41449	6.57982	6.11956	6.02283	6.05569
GARS	6.68851	6.71079	8.07204	8.21956	7.78358	6.16979	6.27955	6.76091	7.43916	6.97162	7.07937
CLEC5A	4.49637	3.6206	4.66317	4.14248	4.04534	4.16341	4.4848	5.49282	6.07519	6.51394	5.8234
---	5.41777	5.32121	5.67792	5.10084	5.82131	5.73078	5.89359	5.57349	5.12796	4.97474	4.90785
NDUFA9	5.15422	4.60025	8.68609	8.79666	8.74658	5.75325	5.09104	5.26054	7.44403	6.25768	6.18802
RNF217	4.26083	3.87507	5.15273	4.5613	4.86242	4.10845	4.08674	4.40223	4.86823	5.17805	4.78844
ADAL	3.10042	3.60513	3.92264	3.98221	3.87674	2.80153	2.9005	3.05842	3.48051	3.59959	3.41671
ARID5B	5.1366	5.46474	5.1177	5.72596	5.69857	5.6695	5.39992	5.53663	7.97175	6.01352	7.50783
B3GAT3	6.45483	6.38956	7.38518	7.40438	7.27281	5.65217	6.40654	6.45536	7.63074	6.7391	7.13063
LINC00189	4.31115	4.72651	3.55144	4.29071	5.36142	5.43377	6.3982	5.45481	3.40389	4.11075	4.44274
CDKN3	3.09414	2.49356	2.90783	2.8333	2.89002	2.99744	2.58367	2.58542	3.26466	3.5348	3.46996
SNORA80E	7.9139	7.89586	6.80526	5.99976	6.55181	8.08039	8.04296	7.22836	6.97039	6.33785	6.77451
---	6.26306	6.85571	7.61325	6.72626	6.69353	5.40736	5.71044	5.68148	7.08003	7.00123	6.24416
CRBN	7.36402	6.99948	8.08843	8.44966	8.16089	7.26111	6.9462	7.53624	8.71279	7.67727	8.43902
ERCC6L2	6.58147	6.41324	7.46122	7.16009	7.48574	6.67037	6.93285	6.69552	8.09153	7.08495	7.89088
PRKAG1	7.78694	7.94928	8.33877	8.37037	8.1804	7.80395	7.96537	8.04755	8.49155	8.31293	8.44101
---	5.70728	5.70488	2.41916	3.25177	2.68613	5.33076	5.66524	5.13443	3.57362	4.42603	4.663
SLC35C2	7.03941	7.0587	7.13074	7.21748	7.00141	6.8488	6.87375	6.91969	7.31612	7.70886	7.24982
COL4A3BP	6.82718	6.60477	6.65804	6.6363	6.55396	6.65917	6.33408	6.71216	7.63529	6.88329	7.47585
FAM101B	8.16915	8.49162	6.76264	6.80993	6.72751	7.99001	7.58688	8.5341	8.96511	8.86346	8.76228
RPL15	7.66278	6.84446	11.2892	10.7802	11.1845	6.86775	6.66798	7.51867	8.58542	8.59288	7.67779
TNFRSF1A	10.1233	9.95449	8.93266	8.74179	8.73573	10.1004	10.3708	10.4441	9.35809	9.69589	9.92547
STEAP4	10.1266	10.2464	7.23062	7.30296	7.05992	9.90583	10.4544	10.3799	9.631	9.30403	9.74742
---	4.57161	4.95032	5.08931	5.36963	5.15398	4.88943	4.81081	5.06276	6.00181	5.2991	5.67913
GPAA1	6.97889	7.2754	7.19234	7.16279	7.02304	6.9098	6.72043	6.68182	7.52257	7.22318	7.20607
EMILIN2	5.96617	6.11005	7.96235	8.03196	8.0189	6.18344	6.37015	6.81694	8.66323	6.9871	7.75491
SH3BGRL	7.31765	6.62379	9.11224	9.17331	9.43645	7.45942	7.20759	8.20571	9.31109	8.8415	8.35287
NHSL2	8.56841	8.67733	7.05096	7.27281	6.80883	8.21363	8.64618	9.06494	6.83552	7.52464	8.04383
SS18	5.53922	5.20658	6.93034	7.21003	6.91951	5.21092	5.10941	5.73571	6.38589	5.90033	6.10306
RSBN1L	7.57588	7.39417	5.99225	6.3895	6.02721	7.56795	7.43758	7.75894	6.29405	6.75582	7.18228
---	6.10563	6.17817	6.26273	6.07896	6.23686	6.66886	6.60144	6.30914	5.85549	5.97739	6.14955
PSTPIP2	6.79442	6.56106	7.0599	7.06236	7.31982	7.95699	7.5309	7.15644	9.01607	7.99069	9.22917
IFT20	5.95287	6.07901	6.65488	6.79527	6.84568	6.55132	6.03251	6.70051	8.00585	7.03394	7.19873
ERCC6L2	4.98065	4.54117	5.46132	5.36424	5.71296	4.98868	4.70639	4.95111	6.05546	5.28994	5.72515
CPPED1	11.4306	11.3821	10.4281	10.3282	10.4061	11.2008	11.3199	11.849	10.0311	10.8649	10.7683
SLTM	6.96436	7.18631	7.51721	7.15872	7.67087	6.78593	6.7385	7.13809	7.87487	7.35059	7.64999
C11orf31	4.75842	5.1032	6.4948	6.26297	6.30892	4.86903	4.80853	4.96178	5.33824	5.66726	5.33001
FLVCR1-AS1	5.53117	5.52916	4.18075	4.76706	4.00362	4.90826	5.43247	5.50047	4.51936	4.40625	4.43155
ADGRE1	6.51937	5.67351	7.09591	7.12954	7.1253	4.86945	7.03177	6.10466	8.01025	7.81709	7.43231
ACO2	6.0906	6.03905	7.50282	7.62032	7.68783	5.776	5.72774	5.99206	6.48311	6.30466	6.19105
CUL2	5.21806	5.03754	5.94858	6.21992	6.22719	5.18133	4.56921	4.86864	6.07249	5.41607	5.53794
PTGER4	7.36332	6.74559	6.96044	7.05572	6.9248	7.64302	7.54599	7.55722	5.21933	7.06278	6.1532
GSTO1	6.8922	6.22957	9.01663	8.99394	8.87699	7.02363	7.60527	7.86664	8.62229	8.341	8.25574
CORO2A	5.54821	5.28297	5.5348	5.28162	4.01268	5.39955	5.52632	5.58951	6.8529	6.58078	6.86562
BTN3A1	8.82644	9.15128	7.17333	7.64843	7.95573	9.0016	9.39342	8.78112	5.2761	7.59826	7.80666
NECAB1	3.00003	2.68829	2.82623	2.46499	2.37945	2.64715	2.3677	2.9527	6.39887	3.25234	6.65583
PSMB2	6.37472	6.21904	7.94949	7.82781	8.07436	6.08275	6.57401	6.5203	7.46992	7.12215	6.80981
MRPL40	4.21402	4.37957	6.39538	6.19101	6.41854	4.40689	4.4387	4.41102	4.88736	4.76567	4.9718
ATP5C1	7.30312	7.15915	9.01766	9.00329	9.10523	7.33756	7.10166	7.35689	8.50174	7.62717	7.96897
PDK4	4.20057	4.34169	6.08293	5.87433	5.38059	4.46032	4.51904	4.3969	3.89487	3.47594	3.83617
RPL24	8.08211	7.74467	11.0206	11.0092	11.0303	7.60358	7.0352	8.10653	8.8995	8.60594	8.23518
KIAA1257	6.21466	6.37084	4.73564	4.38675	4.83601	6.40872	6.18354	6.48875	4.95211	5.7195	5.80246
HIST2H2BA	11.0273	10.7045	8.92316	9.21374	8.85882	10.6841	11.2316	10.8174	9.47162	10.4619	9.92083
DHX36	5.77859	6.27175	7.26605	7.38916	7.18696	6.11826	6.00482	6.56218	7.22881	6.69316	7.12048
PTBP2	5.74031	5.31953	6.28058	6.06409	6.32808	5.90509	5.52431	5.62293	7.16989	6.04078	7.40024
TP53I3	5.5829	6.25774	7.38264	7.28706	7.12418	5.79163	6.19723	6.99411	8.59163	6.97228	9.01619
RMND5A	7.61998	7.95829	6.6561	6.96122	6.79192	7.36879	7.19064	7.79891	6.61458	6.53551	6.97985
LGALS3	5.6822	5.77581	7.68713	8.37918	7.93668	6.36048	6.44836	6.38021	7.04884	7.13751	6.93408
TRPC4AP	8.76631	8.5587	7.86794	7.80811	7.91841	8.69726	8.7302	8.78225	8.048	8.14319	8.46793
NELFB	6.82257	6.52572	7.33681	7.31821	7.66106	6.41799	6.5229	6.47065	6.93929	6.9433	7.14632
ERH	8.86959	8.93247	10.1527	10.2142	9.91545	8.64448	8.00897	8.44117	10.2121	9.30974	8.93768
DCTN5	6.137	5.50961	7.34774	7.64984	7.21684	6.18965	5.40376	5.8384	6.84483	6.46107	6.90576
SLC25A12	4.52028	4.3897	6.12801	5.3798	5.98572	4.11879	4.14373	4.63144	6.69453	4.85925	5.90168
---	5.38675	5.15337	6.35632	6.49006	6.75871	5.37636	5.15243	4.93727	4.34917	4.40916	4.73714
PTCD3	3.44077	3.70687	6.94223	7.13687	6.91685	3.40845	3.64396	3.80486	3.95611	4.42414	4.59034
PDCD5	6.6976	6.92214	7.99345	7.78081	7.92851	6.58299	6.55279	6.27371	7.33277	7.2631	6.77562
ZER1	7.59467	7.63038	6.44883	6.2068	6.1962	7.69186	7.63783	7.73974	7.01944	7.14086	7.39131
PIK3CB	6.87676	6.61419	6.63796	7.0322	6.74593	5.98488	6.27908	6.8614	7.39587	6.94608	7.79609
ACSF3	5.2855	5.23297	5.5748	5.70352	5.87832	4.72849	4.63756	4.61542	5.14529	5.20219	5.01294
TIAF1	6.17546	5.92999	6.48242	6.38897	6.74057	5.85208	6.23067	6.14851	6.5426	6.64544	6.98771
GAS5	7.9683	8.61013	6.25197	6.63594	5.83633	7.96089	8.07999	7.86941	6.72832	6.44667	7.44296
CTSA	9.09799	8.9683	9.44222	9.69465	9.46219	9.02984	9.09566	8.96207	10.2258	9.30669	9.94297
SYCP2	4.37192	3.78442	4.13789	3.88481	3.50978	4.39833	4.32052	4.97386	6.71431	5.40449	5.56467
COG7	5.19139	4.67247	6.13184	6.37804	6.14921	3.98175	4.80255	4.68641	5.47917	5.25474	5.29552
CSTF3	3.4362	3.57004	4.94491	4.57304	4.26565	3.67842	3.61679	3.59695	4.24221	4.15585	4.44384
SHFM1	6.21731	5.66466	10.1232	10.2549	10.1279	6.95187	6.67316	7.08845	8.90219	7.9836	7.44931
SNRPB	7.21847	7.12417	7.97485	7.93302	8.0311	6.73523	6.88255	7.16319	7.60278	7.75576	7.25253
APOL1	5.72452	6.33001	5.14965	5.50609	5.69257	6.96567	7.38451	6.09626	4.98353	5.84951	5.66407
STX2	4.17117	4.39937	6.1262	5.80604	5.89846	4.39966	4.40031	4.02752	4.96469	4.73409	4.86355
RSL1D1	4.45722	4.6292	8.70973	8.55782	7.65534	4.11262	4.07334	4.05708	5.32447	4.79989	5.01448
PLP2	9.86862	9.85427	10.2935	10.3557	10.2937	9.58526	10.0309	10.445	11.5783	10.4509	11.2938
RPL23A	8.52473	8.29636	10.8287	10.7791	10.6509	7.86191	7.90586	8.29936	8.59576	8.93467	8.46085
SCP2	3.95539	4.23378	6.08248	6.7246	6.16958	4.34989	4.16986	3.95311	4.80659	4.96573	4.83305
CDC40	7.43562	7.24216	7.86941	8.08701	8.118	7.0308	6.91128	7.56164	8.74105	7.64922	8.13563
C7orf34	5.43647	5.31594	4.61311	4.5439	4.5921	5.9829	5.56527	5.35247	5.04389	4.88523	5.12699
SP140	7.11559	7.91835	6.0865	5.99216	6.15416	7.43555	8.67733	7.90565	5.39479	6.97659	6.74382
SNRPEP4	6.98036	6.69067	7.32868	7.19778	7.1235	6.51507	6.26452	6.41955	6.77722	6.93973	7.00284
SLC12A7	4.53239	4.47574	5.914	6.34855	6.30398	4.80276	4.79656	4.75219	4.40072	4.17895	4.16938
RPL18	8.90517	9.16989	11.7871	11.7473	11.7924	8.32469	8.34782	8.8056	9.62165	9.53429	8.8214
DNASE1L1	5.43069	5.6001	5.9086	5.90573	6.10349	4.95566	4.88457	5.62231	5.96384	5.71047	6.49269
LIMS3L	6.64249	6.7824	7.6863	7.59581	7.7808	6.73137	6.83673	7.20498	8.44278	7.33088	7.83172
LIMS3L	6.64249	6.7824	7.6863	7.59581	7.7808	6.73137	6.83673	7.20498	8.44278	7.33088	7.83172
IRF2	9.55718	9.63758	7.93031	8.12668	8.15458	9.78283	10.0695	10.0626	9.04204	9.41856	9.60278
LINC00167	6.13591	6.16129	4.67096	4.85356	4.91408	5.83664	6.17357	6.06881	5.33563	5.57391	5.6115
FAM105A	5.02449	5.2898	6.78899	6.7383	6.3599	4.87618	5.33151	5.95622	7.76173	5.9617	7.19189
GALNT14	6.07457	6.11982	4.87493	4.35318	4.14526	5.64386	6.78132	7.35034	8.87009	7.42974	8.901
NUCKS1	6.33341	6.50711	8.58919	8.4555	8.86032	5.52926	6.38106	6.34073	7.20316	7.47984	6.63663
CD48	8.57639	7.88831	10.8136	10.8407	11.0309	8.18035	9.14425	9.49362	10.1479	9.98608	10.1217
PSMD6	7.3385	7.24026	7.29897	7.2739	7.5182	7.27975	6.77715	7.05887	8.23688	7.56131	7.60203
KIAA0930	6.2513	5.98003	8.54773	8.41014	8.68933	7.25991	6.43286	6.366	8.73391	7.15514	8.77126
DRAM1	5.29801	5.16336	5.42577	5.21453	5.49277	5.04524	4.44799	5.42784	6.91453	5.58778	6.12809
---	11.3126	11.2586	11.2739	11.3714	11.1852	11.3214	11.1908	11.3957	11.8606	11.6487	11.7307
APC	6.68975	6.82553	6.0252	5.40699	5.55611	6.89858	6.81716	6.96511	5.98572	6.23753	6.43244
TMEM242	3.53476	3.68222	6.33759	5.91205	6.05042	3.76587	3.12636	3.81949	4.44323	4.29854	4.20575
ATXN7L1	7.65712	7.7172	8.75094	8.10642	8.84546	7.85721	7.71363	7.93832	8.53781	8.50272	8.54284
ATP5J	5.49811	5.35243	6.09097	6.2237	6.00246	5.16024	5.18629	5.22112	5.86891	5.71581	5.47594
NCSTN	8.89372	8.48933	9.16359	9.07602	8.90336	8.67515	8.80322	9.03385	9.46307	9.26738	9.59832
DHCR7	4.59934	4.2739	4.19549	3.63088	4.45401	5.18568	4.90126	4.03195	7.24962	5.36605	6.79122
NBAS	3.67269	3.6789	5.85797	5.88777	5.76164	3.59588	3.72646	3.59456	4.60992	3.97041	4.1511
ZFP36L2	5.96989	5.95008	5.58175	5.67458	5.79861	6.37561	5.91351	5.97113	5.7026	5.18157	5.44872
---	5.47772	5.69147	4.18128	4.10517	4.37396	5.04977	5.50244	4.53511	4.1598	4.02656	4.37589
TAP2	8.24643	8.86088	7.1267	7.70892	7.44675	8.09734	8.77401	8.36051	6.73937	7.72299	7.46713
ALG6	4.14865	4.83955	4.89774	4.78325	4.9187	4.15036	4.139	4.5554	5.04945	4.82499	5.20693
RPL13P5	4.13471	4.62013	5.0512	4.66995	5.3396	3.99024	4.48455	3.98637	5.04356	5.06943	4.80008
CASP4	10.6311	10.4037	9.62167	9.84648	9.49258	10.9188	11.1326	11.1691	10.1941	10.6394	10.5685
AMD1	7.38186	7.07628	6.54478	6.57056	6.4884	6.47086	6.7786	7.01066	5.33807	5.85526	6.35088
PTPN18	6.76189	6.52612	7.93947	7.67103	7.03503	5.68051	6.17995	6.55189	7.43264	7.09616	6.96824
CHCHD1	5.18577	5.10313	6.12292	6.42559	6.59034	4.80286	5.20379	5.49146	6.46715	5.68009	5.99809
---	10.4244	10.3001	13.1804	13.1172	13.2717	9.64992	9.42166	10.1691	10.7299	11.4914	10.2675
RPS8	7.91511	7.63682	10.7753	10.8637	10.8536	7.18411	7.25202	8.0288	8.65803	8.98126	7.97898
CITED2	7.30466	7.13426	7.80096	7.7657	7.75922	7.11263	7.20709	7.22772	7.94097	7.58347	7.53009
RFT1	5.18788	5.29366	6.1382	5.61436	5.64715	4.56665	4.84724	5.2118	5.30511	6.26671	6.04653
LSMEM1	5.84279	5.77028	4.29454	4.15292	3.73175	5.68108	5.96274	6.0535	4.65089	5.08131	5.46597
ENTPD7	4.28844	4.70975	4.29577	4.13921	4.16622	3.91335	4.05764	4.19398	7.62981	5.04261	5.47076
TMEM242	3.30958	3.49476	5.90546	5.61671	5.65373	3.4989	2.96597	3.66844	4.32971	4.02328	3.96459
HOOK3	6.09663	6.39489	7.19086	7.07085	6.99187	5.57343	5.5679	6.12592	6.93646	6.37807	6.31309
RAPGEF2	8.00939	8.59711	6.22085	6.73501	6.32935	7.49542	7.77145	7.98412	6.78128	7.12951	6.98836
MARCH3	4.65787	4.17772	4.13994	4.18668	4.55882	4.40938	4.55012	4.41304	5.11871	5.01548	5.85807
ROMO1	7.35537	7.24823	8.41623	8.25961	8.48708	7.48134	7.27205	7.38322	8.70984	8.07779	7.75111
POP4	5.06063	5.36107	6.21191	5.86369	5.94602	4.91949	4.55893	5.11904	5.56372	5.36733	5.63854
TAF1D	6.89084	7.07409	6.72835	6.9358	6.91448	7.09037	7.00069	7.19428	5.90374	6.71604	6.48608
UBQLN1	7.95093	8.13452	8.5743	8.5957	8.76419	7.74254	7.64283	7.8433	8.81429	8.16202	8.2311
MRPS18A	6.16699	6.57469	7.98133	7.91163	7.8366	6.14812	6.50035	6.37577	6.85942	6.94612	6.83507
USP4	9.8927	9.72292	8.595	8.50363	8.34341	9.68394	9.61889	10.2176	9.03273	9.17142	9.34647
DHFR	3.71461	3.76306	3.3027	2.63023	4.6042	4.25335	2.61394	3.31117	4.73866	6.42752	5.52717
ZNF277	4.83699	4.93822	6.64921	6.69512	6.80305	4.55616	4.5435	4.85821	5.34337	5.21449	4.97679
SKI	7.35664	7.5748	6.35032	6.56314	6.62735	7.39122	7.4515	7.55558	6.91257	7.08005	6.99215
NCBP3	6.70856	6.85442	7.04859	6.65741	6.70985	6.6315	6.36096	6.85666	7.65411	7.11721	7.20597
RNF7	5.84576	5.71487	7.11587	7.04788	7.14196	5.70751	5.70484	5.50105	6.88269	6.16444	6.07716
C6orf47	6.27146	6.27189	5.86882	5.98678	5.93331	6.47246	6.41607	6.58923	6.11687	6.07696	6.10548
RNF121	5.44592	5.54953	6.42522	6.11525	6.1483	4.77822	5.01304	4.73736	5.24114	5.57952	5.3304
CEP192	5.74918	6.20619	6.79029	6.65268	7.04878	5.98144	5.57399	5.8962	6.2585	6.75868	6.59552
SRSF2	9.15674	9.00136	7.41738	7.58937	7.81202	8.61282	8.88024	8.57644	7.77435	8.37644	7.50637
SUZ12P1	7.32336	7.16293	6.26178	6.67165	6.7286	7.57794	7.23183	7.08542	6.2351	6.92641	6.25962
TK2	5.73904	5.23395	6.04147	5.80772	5.864	5.6159	5.6374	5.85754	6.35297	6.11629	6.53845
NUMA1	5.27561	5.25574	6.14972	6.25321	6.49806	5.20908	5.45742	5.58104	6.15855	5.76644	6.07611
C12orf60	3.78478	4.00208	3.45537	3.61698	3.87319	3.7932	3.94935	3.76697	3.439	3.26334	3.20725
OGFOD1	4.98909	4.68198	6.19453	5.64787	6.15248	4.30286	4.29754	4.50668	5.05509	5.27682	4.83474
DDOST	6.19632	6.39602	8.21667	8.37137	8.2778	5.78502	5.98186	6.46395	7.38673	6.94223	6.51021
HAL	9.7595	9.8931	7.1582	7.86923	7.75223	10.1737	9.96853	9.91606	8.10329	8.79827	9.55257
PQLC1	7.61939	7.45176	7.72711	7.62097	7.96563	7.19612	7.42324	7.39404	8.02905	7.72918	7.8321
---	7.10231	6.89969	6.20963	5.96629	6.26953	6.89319	7.16454	6.91531	5.93794	6.65152	6.29914
AP1M1	7.76866	7.63634	7.9773	7.88534	8.16727	7.58158	7.29393	7.77512	8.5599	7.90449	8.29544
AMPD3	6.73752	6.12799	5.96954	5.84276	6.21915	6.083	6.4471	6.92305	7.23925	7.65554	7.26401
CD44	9.54299	9.98219	11.3604	11.3068	11.125	9.7471	9.72269	10.6252	11.6742	10.6424	11.134
SNORD3B-1	7.59979	7.22473	10.2355	10.4136	10.2214	7.39001	7.281	7.05818	8.02678	7.62273	8.54549
SNORD3B-1	7.59979	7.22473	10.2355	10.4136	10.2214	7.39001	7.281	7.05818	8.02678	7.62273	8.54549
SNORD3B-1	7.59979	7.22473	10.2355	10.4136	10.2214	7.39001	7.281	7.05818	8.02678	7.62273	8.54549
SNORD3B-1	7.59979	7.22473	10.2355	10.4136	10.2214	7.39001	7.281	7.05818	8.02678	7.62273	8.54549
SNORD3B-1	7.59979	7.22473	10.2355	10.4136	10.2214	7.39001	7.281	7.05818	8.02678	7.62273	8.54549
---	8.24801	8.535	7.01665	6.97283	7.00603	7.44718	8.24128	7.80319	8.75637	8.33745	8.63278
CASP2	6.74883	6.62568	6.94259	7.26774	7.37591	6.70766	6.95653	7.14291	8.41689	7.53779	7.54319
HPRT1	4.1634	4.83509	6.23159	5.70871	5.77045	4.37471	4.17008	4.89825	7.04922	5.69138	5.29872
GTDC1	7.76523	7.27904	5.55706	5.49714	5.78329	7.34597	6.87861	7.36121	8.16889	7.6341	8.06036
---	4.31603	4.37231	3.86183	4.84312	3.9412	4.95463	4.97239	4.6056	4.33751	3.10289	3.30013
---	7.57546	7.60751	5.33384	3.96807	4.76843	6.45032	7.37684	7.32428	5.29478	6.0213	5.82164
RPL23A	8.1106	7.90614	10.8583	10.6621	10.8412	7.49221	7.47678	7.76149	8.14373	8.65953	7.96858
MFSD1	7.51079	7.06138	8.50479	8.77719	8.5061	7.69447	6.74811	7.45428	8.91776	7.9026	8.37648
PAG1	6.57707	6.09237	6.39666	6.26532	6.85554	7.76546	7.1825	7.24115	9.25417	7.84149	8.94296
GABBR1	5.23456	4.98288	7.62137	7.37791	7.45474	4.45908	5.18488	5.4421	5.61944	6.11279	6.76207
SNAPIN	4.34119	4.13994	6.51324	6.56892	6.15808	4.81655	4.73423	5.03257	6.16267	5.41256	5.40765
ZDHHC3	8.30868	8.57738	8.40975	8.5193	8.43188	8.58849	8.26973	8.87637	9.96422	9.14402	9.19943
MPZL3	7.48575	7.27736	5.02827	5.45978	5.27263	7.08574	7.8925	7.70376	6.73915	6.90531	6.73665
NSMCE1	5.37884	5.87939	7.32589	7.4665	7.23734	5.63967	6.13086	6.08093	7.29778	6.45281	6.713
DDX3X	9.18966	9.48421	8.32733	8.55256	8.12864	8.85518	9.10696	9.12593	8.18711	8.40767	8.62666
MANEAL	4.20905	4.41474	4.0597	4.30999	4.2537	4.57326	4.35642	4.57381	4.19516	3.88153	3.64972
SYNC	3.60669	3.66803	3.53753	3.26865	3.57115	4.08254	4.39758	4.07652	3.07952	3.70988	3.68344
ATP5B	8.56493	8.41278	10.3193	10.1342	10.3475	8.24668	8.33489	8.83187	9.19918	9.15399	8.93168
GRK5	6.638	6.59898	5.55762	5.81689	6.08079	5.99678	6.0016	6.41207	4.61364	5.57755	5.42877
TMCC3	7.54122	7.79907	5.03789	5.61578	5.45478	7.59677	7.53665	7.79086	6.53575	6.69129	7.28225
SNORD33	8.57057	8.64369	7.65293	7.59404	7.56877	8.06984	8.52509	7.88434	7.4717	6.50945	7.55187
---	6.71722	6.55509	5.56703	5.51311	5.49682	6.48191	6.5613	6.4908	5.85317	6.16041	6.15929
TNP1	4.04066	3.69965	3.60493	3.62325	3.69471	3.89176	3.87837	3.95104	3.28298	3.62699	3.24391
ROM1	5.33212	5.16621	4.77144	4.71734	4.60405	4.72042	4.99831	4.6593	6.13381	5.13057	5.59626
ATF3	5.1402	5.09964	7.14747	7.56085	7.46784	4.62261	4.5693	4.56628	4.15103	4.09708	4.09976
SNORA3A	7.77551	8.09768	8.15972	7.38112	7.59345	7.59589	8.38972	8.16016	6.71413	7.44358	5.97493
HDAC8	4.5467	4.37157	6.55962	6.38695	6.35642	4.45204	4.22951	3.94777	4.75127	4.92831	4.64946
YTHDC2	4.26309	4.24343	6.20543	6.24938	6.05015	4.5218	4.70558	5.09953	6.14857	5.27666	5.43228
VRK3	8.06019	8.06182	7.25228	7.31013	7.3758	8.25624	8.1617	8.38686	7.62892	7.98802	7.78163
---	6.00304	6.02505	5.42562	5.75661	5.71766	6.76	6.44245	6.08177	5.82235	5.77088	5.78442
---	2.38878	2.44441	2.58085	2.46438	2.55233	2.24021	2.16967	2.43466	2.68342	2.65426	2.77775
RPS3A	9.26633	9.21415	11.1603	11.0782	10.4581	8.86693	8.49113	8.98464	9.69133	9.6233	9.33495
UBE2J1	9.39548	8.49187	9.0737	8.7257	8.58803	8.94021	9.19563	9.37931	10.4901	10.0104	9.87071
ITPK1	7.90916	8.21166	6.54347	6.67819	6.94082	8.6109	8.09055	8.17863	6.13883	7.40871	7.59632
FDPS	5.6837	5.48157	6.42083	6.4169	6.40126	5.88999	5.3401	5.80456	6.28028	6.38286	6.1228
UBA6	5.82796	5.61795	6.42795	6.35105	6.56875	5.72727	5.5316	5.81154	6.63868	6.22085	6.0531
ZBTB22	5.72262	5.87514	5.58003	5.40945	5.39425	6.21138	6.30828	6.25249	5.64981	5.83285	5.9391
PIKFYVE	6.21122	6.21194	6.32007	6.04309	6.22963	5.91064	6.19267	6.25822	6.74154	6.47699	6.68377
---	7.57846	7.57162	7.11305	7.00987	6.89407	7.19838	7.6785	7.16586	6.98097	6.62458	6.49085
PCMT1	8.33395	8.41465	8.69982	9.25383	9.05339	8.42441	8.45657	8.95932	10.1839	8.99602	9.86128
SUMO1P1	8.9551	8.37498	5.70277	5.40403	5.1032	8.11574	8.34582	8.32938	6.8504	7.81086	7.27355
ZNF681	2.39939	2.37649	2.51194	2.468	2.57701	2.52842	2.44546	2.62802	2.19208	2.13718	2.09672
CCNC	4.37305	3.57502	6.29025	6.41451	6.69487	4.26013	4.08739	4.34102	6.03147	4.69289	5.4674
ARRDC3	9.31543	9.59563	7.34807	8.26097	7.38727	9.36966	9.66932	9.61596	7.80981	8.38875	8.98635
HORMAD2	2.77858	2.80846	2.59727	2.71222	2.77248	2.9509	2.66324	2.81691	3.1549	3.24378	3.44628
TTC14	5.05422	4.67296	5.92851	6.05835	6.14605	5.21434	5.09339	5.13083	6.23711	5.66309	5.57569
DYNLL1	6.088	5.64364	8.1752	7.74251	8.16529	6.09326	5.6863	6.07108	6.88312	6.42075	6.72861
C14orf119	6.97146	6.71683	7.32972	7.13536	7.2776	6.49325	6.8516	7.33936	7.81415	7.38562	7.88828
ITGAM	8.7407	8.77005	8.67583	8.40676	8.44085	8.91056	9.11858	9.23597	10.1889	9.33458	10.2795
COPZ1	5.64809	5.53224	7.91036	8.08893	8.1318	5.89166	5.23266	5.89963	7.22173	6.58958	6.15074
GMPPA	5.96944	6.16192	7.66906	7.72574	7.62026	5.92112	5.82352	5.68998	6.5644	6.19422	6.19698
SERPINB10	4.55935	4.10965	4.31131	5.54153	5.95633	4.34196	4.01514	4.84095	5.15378	7.76931	7.21689
FEM1C	6.95583	6.67152	6.64746	6.66159	6.69438	6.13716	6.5269	6.76086	7.27365	6.86322	7.34944
MED24	4.65404	4.82629	6.59263	6.02594	6.4694	4.17356	4.47233	4.67535	5.60858	4.97676	5.1053
SYT11	3.76338	4.19159	5.39588	5.69659	5.70653	4.27069	4.26561	4.34755	6.92426	4.99943	5.38072
SNF8	8.0197	7.83227	8.6184	8.98596	9.11485	7.52975	7.57654	7.73271	8.2513	8.21663	8.03861
ORAOV1	4.28276	4.71708	4.97437	5.28055	5.12651	4.25887	4.43487	4.30449	4.7131	4.96657	5.01145
AK6	4.52668	4.88918	6.5736	6.71687	6.46449	4.38944	4.36088	4.35208	5.61569	5.14775	4.68541
ND5	8.59585	8.24005	10.849	10.9667	10.9291	7.78798	7.8341	8.81788	10.228	9.36247	8.80888
ACP1	4.5822	4.82474	7.70315	7.67197	8.04332	4.48114	4.7297	4.5378	6.23903	5.81229	4.88847
ITPKB	5.46701	5.42892	4.75307	4.58338	4.83772	5.25804	5.48427	5.48527	4.772	4.94319	5.07176
GBP3	4.55785	4.8612	5.22072	5.40658	5.36558	5.31407	5.73814	5.19867	4.35857	4.99664	4.73124
RPL23A	8.15013	7.96368	10.8681	10.6406	10.8081	7.573	7.43344	7.69848	8.23595	8.66058	7.88136
UQCRC1	6.33932	6.0705	7.78319	8.04996	7.98074	5.97321	5.65184	6.51885	7.19264	6.50069	7.18806
ITGB1BP1	5.73859	5.69926	7.6788	7.60568	7.70085	5.29441	5.50531	6.30941	7.14051	6.39366	6.50001
HGF	3.54609	3.2748	4.36419	4.59077	4.37145	3.4954	3.38074	3.41586	6.40835	3.77186	6.03644
ELF2	8.06582	8.06787	6.47535	6.39508	6.65281	8.08763	8.08728	8.32947	6.73858	7.64084	7.63942
NIPBL	8.46553	8.59102	7.65163	7.84695	7.54875	8.48278	8.57851	8.6891	7.91349	7.77236	8.31616
TXNDC5	5.5419	5.82202	7.70624	7.38444	7.40428	5.70742	5.64539	6.01311	6.28478	6.27028	6.64753
DRG1	5.31676	5.89163	7.41254	7.69162	7.42875	5.36141	5.45067	5.86892	6.61003	6.53313	5.98537
KIAA1715	5.37335	5.07802	5.21529	5.8108	5.6464	5.21537	4.62836	6.44424	8.27548	6.41749	7.19206
ARID2	6.57866	6.26637	6.55713	6.75238	6.4809	6.15555	6.19046	6.4741	6.84313	6.65788	7.12703
VNN3	9.23173	9.82002	5.73007	6.3813	5.4333	9.76786	9.16095	9.52975	7.34601	8.1389	8.84262
EMB	6.9488	6.88213	7.25891	7.33301	6.93344	7.27348	7.35972	7.59141	8.59509	7.69986	8.95901
RPL31	6.76779	6.75073	9.76265	9.25309	9.3357	6.53391	5.92142	6.72853	7.26494	7.39389	6.97426
PSENEN	9.14	8.96095	8.34657	8.53956	8.31195	9.10417	9.4649	9.45255	8.75822	8.84619	8.90628
---	2.93365	2.80151	2.62955	2.82002	2.78556	2.52006	2.46098	2.75942	3.23739	2.85611	3.27902
UBE2N	5.64779	5.88326	6.86026	7.01335	6.97456	5.48244	5.27072	5.47738	6.76478	6.16357	5.74559
PGLYRP1	7.82309	7.94076	5.3266	4.77955	5.66112	8.04495	8.10347	8.74863	8.87889	9.44875	9.6575
LAMP1	8.53415	8.60944	8.652	8.61938	8.79583	8.43663	8.46847	8.71157	9.09552	8.95788	8.91098
LMBRD2	3.19445	3.57999	4.2835	3.81788	3.66366	3.34855	3.21675	3.13468	4.06655	3.69001	4.01609
HIST2H2BA	9.8301	9.80906	8.30047	8.86496	8.25164	9.84486	9.90372	9.95086	8.51847	9.52853	8.96395
CYTB	9.07828	8.56154	10.6442	10.9228	11.0408	8.74226	8.61517	9.48533	10.3785	9.64898	9.79678
LPP	8.11521	7.95775	7.55565	7.47035	7.75838	7.84843	8.25215	8.43736	7.42287	7.69561	7.58636
MIR21	8.8765	8.42544	8.69327	8.88001	8.87391	9.00321	9.02398	9.29939	6.38286	8.60366	7.58589
HK3	6.33482	6.02503	6.94507	6.76431	7.03572	6.54898	6.65844	7.58375	8.98768	7.38643	9.00266
PDCD4	7.05915	7.08637	6.42499	6.7754	6.63554	6.77121	6.94036	6.91285	5.2554	6.54831	5.90018
KDM4C	4.34961	4.79897	6.3045	6.13523	5.84553	4.59807	4.37079	4.37846	6.06581	4.89664	5.33756
RRM2B	6.80614	6.49313	5.63663	5.52876	5.6405	6.45293	6.4244	7.15668	5.94344	6.00186	5.99479
MICAL2	8.12461	7.90917	7.65033	7.40199	7.69713	7.91074	7.54934	8.64763	5.72625	7.44907	6.59915
HIST1H3I	6.13942	5.44548	7.38286	8.33043	8.12633	6.03643	5.71753	6.72886	7.49662	8.46277	7.01597
ARFIP1	7.74784	7.76887	6.821	6.75084	6.83171	7.77018	7.98688	7.84361	5.14688	7.21323	6.73755
SNX17	6.10611	5.98533	8.0688	7.35188	7.91401	5.86009	5.7887	6.49443	7.31405	6.83391	6.73106
ASB1	4.59656	4.59273	5.87482	5.68063	5.82297	4.80789	4.53099	4.89878	6.47783	5.00502	6.69139
TMEM209	4.18288	3.97648	5.36652	5.88751	5.82595	3.98023	3.88152	4.23208	4.86032	4.93452	4.40761
AKT1	9.2817	9.43594	8.46597	8.45682	8.75835	8.78191	9.09248	9.12014	7.70076	8.70291	8.05362
LRRC8D	5.91411	5.82907	8.11693	7.73375	8.10047	5.64565	5.55277	5.69271	5.92359	6.30225	6.46692
KIF1B	7.22723	7.30902	6.23978	6.36865	6.11931	7.70478	7.34422	7.76893	9.0419	7.86001	9.07567
NUP88	4.32515	4.28916	7.00729	6.45562	6.77791	3.45781	3.56522	3.71916	4.94199	4.92677	3.85461
RPRD2	6.92271	6.53561	7.50038	7.28922	7.20682	6.01173	6.37412	6.59208	7.07025	6.76607	7.23408
NDST2	6.78826	7.01085	6.81022	6.99291	7.07239	6.56249	6.58809	6.89422	8.42961	7.22014	7.39749
ALG13	4.1528	4.09194	6.15027	6.08708	6.00002	3.44884	3.99746	4.3955	4.83063	4.86076	4.49678
CNR2	4.65383	4.23798	4.03787	3.67132	3.98139	4.43082	4.70624	4.46653	3.95936	3.98897	3.98185
NDUFA13	7.96004	7.68482	9.9223	9.90029	9.95939	8.02702	7.75378	8.09158	9.14258	8.80667	8.23364
RPS28	8.82809	8.81005	11.3782	11.3786	11.4498	8.42386	8.51919	8.73571	9.50795	9.56058	8.77178
ORMDL1	6.03787	5.68339	7.64484	7.74742	7.87773	5.40846	5.69748	6.30986	6.83131	6.53789	6.46345
TIAM2	4.80113	4.39989	3.88155	3.64637	3.59557	5.18254	6.20105	5.86268	4.14844	5.06286	4.8528
---	5.02602	4.82695	4.08439	4.20491	4.13995	4.68007	4.90691	4.54693	5.28557	5.05929	5.74823
LHFPL2	5.08943	5.43461	5.89309	5.46765	5.66218	5.83676	5.84083	5.24743	4.7185	5.20301	4.44627
ANO10	6.05946	6.14787	5.38678	5.44872	5.32978	5.82832	5.42652	6.30738	7.2721	6.37133	6.68714
SYNE1	4.94169	5.05011	4.11586	4.47455	4.06443	5.30228	5.49864	5.4465	7.864	5.7582	8.39822
KIAA0355	6.03685	6.35926	5.7037	5.39711	5.4065	5.70202	5.66591	5.91908	4.71769	5.15383	5.3819
DCTN6	4.78413	5.47758	5.75363	6.41372	6.05208	4.8829	4.65752	4.74815	5.78524	5.34778	5.55369
MFF	7.06729	6.94751	7.5735	7.76724	7.50462	7.27947	6.8225	7.15921	8.79882	7.39396	8.30517
COX5A	6.04814	6.18724	7.98388	7.73187	8.32371	5.73672	5.18264	6.31034	6.8178	7.06996	6.4118
ACOT8	6.29857	6.16003	6.53071	6.19404	6.67845	6.19227	6.28836	6.37782	7.22961	6.56192	7.22031
PBDC1	4.4542	4.54809	6.16552	6.38072	5.3529	3.83725	4.94088	4.51848	5.98588	5.47498	5.36899
MEA1	7.31341	7.42663	7.75082	7.79066	7.70928	7.46152	7.10444	7.20389	8.01421	7.77722	7.5665
HENMT1	5.44321	5.78076	6.19055	6.21975	5.78597	5.55371	5.45523	5.77802	7.25124	5.91972	6.81949
NDUFA7	5.04489	5.29924	5.77498	5.82135	6.1583	4.71709	5.23335	5.06798	5.90274	5.52787	5.55274
---	11.5088	11.5583	7.64271	8.44026	7.33141	10.669	11.0452	10.5776	9.09502	10.2726	8.73873
---	2.45234	2.37798	2.51493	2.1289	2.73759	2.58324	2.5689	2.61509	4.595	3.06215	3.60672
SMCHD1	10.1793	10.1225	7.31974	7.8832	7.19634	9.95371	10.2965	10.039	8.67	9.46171	9.48264
PNOC	4.98908	5.03177	4.92245	4.77033	4.69095	5.0356	4.82982	4.78149	4.34804	4.428	4.54115
FRG1	5.46473	5.71217	6.30665	6.29669	6.45499	5.03213	5.19968	5.27855	5.97687	5.88804	5.41896
---	6.44344	6.43797	4.97223	5.49833	5.68727	6.72493	6.05567	5.78665	5.54142	5.19943	4.79503
GABBR1	5.54317	5.25574	7.92754	7.78099	7.77361	4.6664	5.46356	5.70712	5.87144	6.37404	7.10908
AOC2	7.61717	8.34526	5.65884	5.31474	5.05189	7.59781	8.10217	7.60022	5.40533	6.81937	6.91603
NDUFAF6	3.62577	3.80632	4.42994	4.64492	4.58649	4.09699	3.83787	3.43056	4.27265	4.46727	4.4733
KIAA1683	6.60695	7.07694	6.0005	6.15211	5.80788	6.62322	6.19522	6.77703	5.74447	5.75511	6.02654
C2orf47	3.71696	3.48034	4.90565	5.21247	5.37427	3.63527	3.25067	3.24496	5.44016	3.66828	5.42166
UBR2	10.2082	9.87974	8.03446	8.08862	8.08418	9.74949	10.0717	10.1323	8.64091	9.2866	9.59183
LIN7C	6.11083	6.13238	7.54289	7.34243	7.59537	5.79446	5.44475	6.08479	7.21162	6.40178	6.32023
SULF2	9.91379	10.1655	9.57555	9.65674	9.84685	9.31656	9.85301	10.1713	4.65274	8.92135	7.02162
USF1	8.22513	7.94609	7.83909	7.85889	7.74133	8.03203	8.29494	8.26783	7.3471	7.749	7.82093
---	3.95937	4.27807	3.58717	3.59841	3.18473	4.55416	4.26425	3.87254	3.66749	3.4392	3.47753
ANKRD20A8P	2.62817	2.43991	1.86864	2.44155	2.12366	2.93741	2.72971	2.96342	2.21868	2.3549	2.35865
RPL8	8.48242	8.57236	10.733	10.6424	10.8042	8.20093	7.89085	8.30428	9.02697	9.23672	8.3826
HNRNPM	7.08116	7.0506	7.54209	7.63148	7.562	6.72651	6.47736	6.89214	7.28179	7.43212	6.99306
DARS	5.33393	5.83545	7.30425	7.28671	7.27544	5.27882	5.79823	6.00403	6.49337	6.99101	6.20033
GSDMD	6.43204	6.40547	5.7523	6.08948	5.95215	6.66187	7.04457	6.99676	6.23834	6.18687	6.57191
ZNF587	6.84195	7.45202	5.37078	5.01523	5.07478	6.90667	7.31885	6.57608	6.00603	5.86622	6.39084
YIPF3	9.2229	9.19238	7.98743	8.0038	7.88267	9.01132	9.14604	9.321	8.63035	8.75307	8.80504
CUTC	7.51472	6.79464	7.27648	7.0422	7.26622	7.44294	7.73703	7.48972	8.4821	7.95592	8.76508
HBS1L	5.57811	5.35779	6.86087	6.72831	6.74604	5.32387	5.23137	5.72814	6.56393	5.87303	5.98866
RIN3	7.41733	7.40116	7.26279	7.36052	7.61226	7.62843	7.65442	7.52826	8.39078	7.84198	8.62386
STAMBPL1	3.71185	3.5504	3.28054	3.19268	3.12904	3.36899	3.33993	3.7731	3.933	4.29895	3.94448
FAM120A	7.81965	8.09815	7.6363	7.81191	7.96366	7.94726	7.94642	7.90633	7.46622	7.32633	7.57356
WDFY1	6.43353	6.9306	6.83704	7.32821	6.913	7.32449	7.63694	6.89268	6.42959	6.22567	6.70505
LOC100131541	7.86763	8.21988	6.55827	6.71588	6.56443	7.02147	7.73232	7.32845	4.18976	6.57047	6.03316
---	6.66023	6.17469	5.11085	5.15953	5.46154	6.03235	6.19876	5.88244	5.23188	5.63379	5.34356
RNF144B	8.45127	8.16162	7.62473	7.53627	7.97115	8.05057	8.03596	7.97937	8.86444	8.30867	9.14235
---	4.37643	4.71923	4.7176	3.65496	4.17032	5.0959	5.22549	4.82785	4.29443	4.25231	3.89746
GABARAPL1	8.85374	9.1662	7.48697	7.52393	7.28745	9.05227	8.82364	9.00826	8.1969	8.68157	8.27479
---	5.3162	5.12234	6.01793	5.91871	5.97188	5.20097	5.23757	5.20997	5.67284	5.65339	5.5059
TUBG1	5.35835	4.82521	6.40948	6.02144	6.20803	5.26327	4.70423	5.15469	6.00061	5.6484	5.65442
RPS28	9.04147	8.98241	11.1202	11.1591	11.0287	8.53087	8.58546	8.79687	9.50804	9.53351	8.83917
PRKD2	8.07525	8.34375	5.82294	6.30005	5.9374	8.12215	8.50909	8.529	6.96223	7.88532	7.69953
ERICH1	5.41311	4.99475	6.03044	5.12583	4.53436	4.08726	4.51344	4.13785	5.50875	5.13719	5.60427
SLIRP	8.18994	7.30439	10.164	10.0128	10.1681	7.63596	7.37036	8.34101	8.76569	8.94376	8.57867
PHB2	7.09369	6.79963	9.01111	8.92198	8.97662	6.78049	6.80481	7.32193	7.75904	7.552	7.42227
MAT2B	6.388	6.61949	5.79857	6.17268	6.04534	6.58992	6.89807	6.67863	6.10767	6.29389	6.22591
ERMP1	4.27066	4.18287	4.78896	4.70129	4.83225	4.25635	4.41078	4.15365	4.86823	4.65232	4.61348
ZMYM4	4.87984	4.95941	8.02486	7.83782	7.76122	5.77648	5.29533	5.42285	6.47836	5.81673	6.21446
LOC441081	7.28361	7.00951	8.68534	8.30292	8.96288	7.65697	8.3887	8.40446	10.5026	8.53534	10.3591
ADPRHL2	6.30184	6.58903	5.79149	6.16016	6.20865	6.04911	6.60204	6.33505	5.45898	5.91962	5.52529
SPCS1	6.29281	6.23951	7.26274	7.24294	6.97573	6.04014	5.96951	6.22826	7.09112	6.46213	6.56161
---	3.1147	2.77245	3.24402	2.94502	2.86422	4.12025	3.05535	3.24467	2.73301	2.54004	1.66506
LARP4	4.74536	3.88559	6.1181	6.48738	6.59038	3.86403	4.22861	4.62221	5.65278	5.00795	5.06448
AP3B2	4.41429	4.27639	4.30769	4.00364	4.15645	4.20517	4.30699	4.42492	6.44808	4.69539	7.48896
SNRPD1	3.49783	3.44768	5.16167	5.31163	4.80673	3.11544	3.27336	3.38204	3.61151	4.31161	3.91941
S100A12	10.9841	11.3783	10.9415	10.8396	11.2147	11.7604	11.2387	11.8013	12.993	11.9796	12.6234
SSTR5	4.94963	4.7688	4.2856	4.47646	4.45717	5.09409	4.96535	4.76187	4.20824	4.6764	4.25938
RPL37AP8	4.29722	3.81573	5.60654	5.90808	6.14935	3.84391	3.41072	3.60589	4.94682	4.6878	3.98672
PRPSAP2	5.0328	5.61953	6.53223	6.69831	6.8925	5.47487	4.92737	5.59598	6.48487	6.01736	5.96666
SERPINB1	9.6963	9.70227	9.56257	9.54229	9.54856	10.0969	10.2864	10.4201	11.2888	10.498	11.0025
---	8.18779	8.37777	9.71086	9.86837	9.79584	7.92728	7.68409	8.01059	8.9147	8.53097	8.1603
MOSPD3	6.53731	6.05097	6.49075	6.39505	6.75033	6.52698	6.46062	6.62798	8.3241	6.9194	7.56753
RPS4X	8.09949	8.20904	11.0994	11.1705	11.0745	7.4059	7.41437	8.23758	8.67379	8.86496	8.13675
LOC101929738	7.02452	6.76535	8.38641	8.03211	8.69206	7.38375	8.11547	8.13365	10.2294	8.25684	10.0859
TMEM140	8.92541	9.27892	5.26724	6.06519	5.33582	9.26105	9.87416	9.16435	6.54975	8.15222	8.61339
CPT1B	6.7814	7.10659	6.63624	6.35794	6.57741	7.29781	7.28838	7.45479	6.67496	6.90697	6.95046
GTF2IRD2B	5.1181	5.17058	5.45302	5.12229	5.54428	5.05388	4.77268	4.89272	5.51006	5.24829	5.87741
SLC29A2	5.30675	5.29811	4.9672	4.76346	4.94684	5.61379	5.35664	5.2988	4.90745	5.06513	4.95849
RPS15AP1	6.30519	6.7705	8.93927	8.93158	8.76905	6.39948	5.67185	6.46157	7.8782	6.89657	6.9027
PPP1CB	7.62766	7.45611	7.57088	7.76422	7.45484	7.57461	7.21155	7.45633	8.39922	8.053	7.73381
---	8.27182	8.11093	6.55697	6.18673	6.97268	7.92055	7.55831	7.88898	6.84605	7.29557	7.00081
SNRPG	5.53606	5.46936	5.16321	5.19794	5.18796	5.52296	5.95456	5.80619	5.0519	5.48761	4.71916
GNG5P2	9.41511	9.41194	9.23178	9.33589	9.27825	9.39122	9.72272	9.5503	10.0959	9.99337	9.881
LYVE1	5.3562	5.46531	4.54881	3.67515	3.87489	5.67788	5.85669	6.96716	4.46898	5.24352	5.01825
SSTR1	3.89826	3.78161	3.446	3.43819	3.36898	3.60152	3.80554	3.6573	3.18101	3.25686	3.39993
SCARNA4	6.82756	7.64677	6.45142	5.85209	6.32875	7.44615	7.95026	7.17319	6.77367	6.22935	6.61082
ODF3B	6.39955	6.7899	5.87747	6.43889	6.58251	6.69603	7.30949	7.27005	4.85755	6.53393	5.83222
METTL17	4.25488	4.05174	5.8435	6.01358	6.08189	4.36275	4.18676	4.16382	4.62042	4.85433	4.62123
CLEC18A	6.0926	6.45381	4.91647	4.58256	4.39296	6.73821	6.79345	6.66298	5.48782	5.82636	6.41587
GTF3C6	4.36294	5.19309	7.71765	7.916	6.79621	4.39613	3.99465	5.15161	6.22257	5.9555	5.45632
ANKDD1A	6.38994	6.30176	5.91891	5.91616	6.00527	6.13654	6.23419	5.87091	6.81572	8.52342	6.88999
CLEC9A	4.73683	5.60565	3.22291	3.2121	3.39154	4.06397	4.29411	4.465	3.6467	3.56017	3.38017
TPPP	5.48273	5.41304	5.00034	4.88309	5.31671	5.74425	5.58626	5.63683	4.71126	5.31619	5.10034
LARP1	6.1742	5.82456	7.35568	7.39442	7.71801	5.93597	6.52469	6.3735	6.73351	7.03018	7.53812
HIST1H4B	5.3601	7.07383	4.6795	4.63512	5.14207	7.15588	6.49154	6.64827	4.49201	5.34194	5.783
NIPSNAP1	5.2759	5.22974	5.48779	5.26089	5.90025	5.09119	5.46981	5.43803	6.33	5.76655	6.03657
PPM1D	5.87691	6.09988	5.64755	5.28534	5.36724	5.61628	5.81648	5.86189	4.66193	5.12657	5.42689
EPHB4	6.39579	6.79055	5.22202	5.16038	5.16693	6.32648	6.85482	6.38135	5.02305	5.44056	6.20148
RPL35A	8.77948	8.69536	11.0952	10.9773	10.8888	8.53333	8.05869	8.87277	9.56762	9.30377	8.91991
ZDHHC4	5.12598	5.39518	6.71817	6.4144	6.94787	5.00715	5.28883	5.03793	6.15751	5.63095	5.60896
C3orf58	5.89819	5.30263	7.47122	7.42385	7.56712	5.62767	5.2403	6.26626	7.02222	6.26769	6.82991
RAF1	10.5803	10.6143	8.89365	8.7664	8.45959	10.3271	10.536	10.6478	9.49751	10.0256	10.057
---	3.81747	3.45615	3.26587	3.44658	2.37729	3.50387	3.27659	3.97546	1.91962	2.99213	2.22085
SNORD60	2.65334	2.66662	2.5576	2.64536	2.70005	3.04668	3.92152	2.92949	2.5155	2.31522	2.62222
CDH20	3.64334	3.53734	3.21263	3.34082	3.14018	4.18622	3.58613	3.87241	3.40807	3.2944	3.30324
HACE1	3.7199	3.67985	4.19247	4.39121	4.39587	3.5892	3.71208	3.81602	4.19219	3.99291	4.253
---	6.69075	7.12891	6.60096	6.30572	6.60044	6.964	6.73638	6.42671	7.3765	7.37803	7.22743
SNORA28	8.26034	8.34463	5.83019	6.3354	6.03608	7.69465	8.28788	8.155	7.42516	7.50664	6.80516
SSR3	4.40406	3.86987	6.53309	6.3739	6.2448	3.91062	3.82448	4.19561	5.98781	4.49428	4.9151
ATAD3A	5.64491	5.59711	5.42964	5.30534	5.55301	5.80507	5.89816	5.56237	5.32958	5.3093	5.30234
CDC42EP3	9.79586	9.58915	9.27907	8.81522	9.07931	9.26885	9.40958	9.82887	10.062	10.167	10.1125
---	4.63146	4.21164	5.38349	5.32745	5.02966	4.86651	4.998	4.8545	5.47334	5.28664	5.80278
TNRC6B	8.44745	8.63557	7.12442	7.09226	7.3849	8.42095	8.41651	8.49908	7.93214	8.05474	8.05257
NDC80	3.78002	4.48648	2.81629	2.77276	2.71857	3.7015	4.90034	4.01809	2.62224	3.58131	2.8749
FBXL4	5.72356	5.53677	6.14786	5.8678	5.81124	5.37436	5.32607	5.77226	7.66946	6.0803	6.37817
RPS28	9.16492	9.11049	11.2279	11.2578	11.1298	8.65367	8.71477	8.92713	9.60947	9.64831	8.96041
ATP5SL	6.17309	6.16784	6.8175	6.51852	6.32577	6.07303	6.15315	5.99355	6.65764	6.43848	6.63941
PLAG1	2.70686	2.72897	2.85405	3.04818	3.04894	2.74004	2.76064	2.66992	3.3238	3.08369	3.03982
EMG1	4.59168	4.34506	6.36854	6.52643	6.32352	4.16543	3.80309	4.26971	4.47882	5.06418	4.6309
---	7.523	7.1878	10.5128	10.4179	10.1447	6.56681	6.79756	6.97977	7.47028	7.9026	7.1577
DKFZp434E1119	7.69936	7.57034	4.76374	5.14649	4.78009	6.71283	6.87697	6.30736	4.80824	6.29721	5.38433
ZNF382	2.63588	2.6457	2.51593	3.25309	2.76967	2.47148	2.38371	2.56324	3.39318	3.29099	2.8569
GGT1	6.9655	7.30769	6.66053	6.60891	6.57045	6.85898	6.63406	7.14299	7.54239	7.39716	7.33183
ATP5EP2	7.05333	7.19409	7.66418	7.9655	7.61139	6.87387	7.05953	7.08539	8.0123	7.29049	7.67479
PTPRA	5.96995	6.06489	6.21063	6.11245	6.07779	5.79587	5.88423	5.89859	6.34197	6.10444	6.35774
DCUN1D3	5.73331	5.77509	5.74563	5.85077	5.75565	6.23172	6.45479	6.34657	5.61072	6.05344	5.92886
NDUFA11	6.66174	6.83694	8.49548	8.56958	8.79009	6.85801	6.86965	6.79885	8.0648	7.41398	7.19521
---	4.13305	4.20192	3.92838	4.05623	4.34634	3.97829	4.10885	3.92096	4.46347	4.47157	4.44886
OTX1	5.53106	5.57722	4.77113	4.77715	4.91447	5.74986	5.43907	5.41408	5.09684	5.02523	5.15989
ARID5A	7.40917	7.6087	6.72602	6.96878	7.16887	7.72689	8.09608	7.91143	7.51776	7.29494	7.27469
DNAJA2	6.72234	6.84835	6.91837	6.59013	7.2798	6.8115	6.25427	6.48818	7.58553	7.07633	7.16403
COMMD4	5.31276	5.25574	6.57484	6.76226	6.62889	5.63817	5.50084	5.72218	6.38065	6.02872	5.93597
PKIG	4.38059	4.48332	4.11356	4.16656	4.29602	4.64527	4.63697	4.38644	4.06652	4.26382	3.97208
---	8.9457	8.82676	10.2455	10.1182	9.74477	8.81789	8.65717	9.18481	9.73155	9.38006	9.47091
INTS6	6.29833	5.98843	5.02019	4.86773	4.72756	6.03379	5.97548	5.99614	5.51281	5.26811	5.68214
FCAR	10.0384	10.3717	9.19989	9.18067	8.75147	9.61483	9.65164	10.1687	10.7668	10.4047	10.391
SERF2	6.74418	6.71637	7.2125	7.08483	7.08903	6.54087	6.67275	6.65245	7.49658	7.07611	6.90248
NDUFB10	6.59089	6.38054	7.87565	7.7022	7.93562	6.46876	6.37461	6.7677	7.37494	7.04094	6.9053
---	9.54154	9.52196	8.08172	7.86809	7.50232	10.0019	10.3592	9.57119	8.18408	8.4391	9.63012
---	9.54154	9.52196	8.08172	7.86809	7.50232	10.0019	10.3592	9.57119	8.18408	8.4391	9.63012
KIAA0100	6.35133	6.54967	7.16974	6.97352	7.15337	5.91884	6.08606	6.18425	6.44443	6.48313	6.55679
CFL1	10.9936	10.9455	11.0515	11.0569	11.0768	10.8432	10.895	11.031	11.8347	11.3419	11.2373
PSMD7	8.65476	8.43295	9.46806	9.51649	9.63942	8.40566	8.1668	8.82101	9.67968	9.19041	8.86421
HIST2H2BA	9.06248	8.76662	5.22756	6.71178	5.8119	8.46237	8.73394	8.77843	6.24618	8.09986	6.74782
RPS27L	4.33752	4.38232	5.9188	6.29416	6.05786	4.63173	4.27088	4.57583	5.30411	5.4025	4.75729
SF3B3	5.19155	4.96572	7.48894	6.96401	7.21675	4.44009	4.92513	4.67759	5.21308	5.55053	5.20472
---	4.97807	5.46157	8.02873	7.78111	7.8559	5.03626	4.91648	5.39093	6.64636	5.7148	5.70366
GSTK1	6.51055	6.14379	8.0365	7.89902	7.82378	6.55885	6.99932	7.02762	7.92337	7.42546	7.31219
---	4.82702	4.47184	3.52964	3.82316	3.15682	4.51818	4.56343	3.70112	3.80268	2.70573	2.76845
BTBD11	4.37661	4.38159	4.36082	5.1143	4.8722	4.06868	4.17885	4.46701	3.47858	3.68045	3.55222
TMEM106A	6.26542	6.30523	8.23915	8.35703	7.98153	6.04409	6.15339	6.30983	3.92736	5.43041	5.48448
---	5.77914	5.52206	5.59031	4.88341	5.47234	5.63228	5.66976	5.73603	6.32213	6.45296	6.18773
MAP3K14	6.41068	6.6233	6.76616	6.3234	6.28637	6.07007	6.33159	6.33294	5.5222	5.67085	5.82697
FAM160A2	7.75087	8.06938	7.93701	7.78751	8.03128	8.05942	7.82301	8.10038	9.25418	8.2016	9.31217
SNAI3	6.579	6.22954	5.60207	5.92156	5.72947	6.30468	6.23541	6.54202	5.45796	5.80783	5.99078
PHKA2	6.603	6.92392	6.59729	6.56382	6.54411	6.97308	6.91935	6.91066	7.71087	7.13308	7.84433
SAFB2	7.4081	7.7892	7.01462	7.31233	7.57177	7.63742	7.63489	7.72203	7.01415	7.23845	7.00686
DMTF1	6.38017	6.15205	6.83902	6.77214	6.75839	6.14105	6.10196	6.50378	7.21049	6.56635	6.8459
TMEM131	6.18767	6.2762	6.92879	6.99087	6.9242	6.18612	6.12636	6.4207	7.25743	6.42362	7.25908
OSGIN2	7.40634	7.19256	6.41511	6.4311	6.45725	7.55769	7.64814	8.10972	6.71593	7.4902	6.88737
CARD19	8.16465	8.30063	7.92692	7.98208	8.23165	7.92682	8.10935	7.94731	8.54633	9.32137	8.40311
SCARNA10	6.66788	7.31755	5.38902	4.00668	4.1956	7.5526	7.22243	6.63039	6.02405	5.86787	5.71722
C7orf43	8.28988	8.48902	6.58901	6.92811	6.63883	7.80854	8.38189	8.56319	6.81502	7.47474	7.75157
TRAPPC13	3.63948	4.0501	4.5632	4.42411	4.53912	3.87858	3.37462	3.85004	4.21834	4.20612	4.4947
GSE1	6.19915	6.50155	6.53585	6.73553	6.41462	6.09739	6.0868	6.92145	4.78883	5.98587	4.98854
MIR191	6.22321	6.32695	4.92539	4.71832	5.16586	6.01445	7.40386	6.06923	4.99374	5.66445	5.28304
TBC1D2B	6.95889	7.27671	7.12305	7.58262	7.31282	6.79066	7.24388	7.28507	7.47623	7.9362	8.15234
SNORD24	7.65219	7.24804	7.0343	6.9422	7.07459	7.62878	7.81845	7.27786	6.84566	6.6151	7.22135
EAF2	6.83669	6.18416	7.96734	8.06741	7.64517	6.76859	6.45567	6.98136	8.55495	7.41308	7.46722
MAGT1	4.99469	4.94794	5.92283	6.02072	5.80854	4.76488	4.71942	4.96679	6.34048	5.54852	5.16135
---	5.49594	5.45871	3.49542	3.59892	3.80502	5.43313	4.78996	4.61284	4.27854	4.38185	4.02681
C5orf24	6.05086	5.81569	7.6038	7.45346	7.61674	5.59291	5.99876	5.73061	6.70386	6.22989	6.1776
---	6.6026	6.37856	9.21835	9.39186	9.33048	6.05489	6.12552	6.39268	7.11718	7.48284	6.4252
CANX	8.36104	8.38659	10.089	10.1798	10.2025	8.22567	8.10457	8.50954	8.94501	9.27669	8.54111
RPL13	7.59348	7.46503	7.32649	7.08951	7.20104	7.57329	7.97765	7.16586	7.21013	6.48053	6.57471
ABHD3	8.24007	7.67883	6.67825	6.60884	6.74415	7.91289	8.1648	8.27443	7.07232	7.33159	7.78773
NSA2	6.17399	6.34577	9.06402	9.17583	9.86767	6.11187	6.14345	6.13798	7.62602	7.16559	6.51418
LRIG3	3.41331	3.41823	3.48838	3.50536	3.3223	3.68828	3.79802	3.56936	3.21959	3.4203	3.06025
SNORA2B	2.79398	2.70968	2.59274	2.57526	2.51417	3.5241	3.47338	2.65788	2.56016	2.41954	2.52836
GPHB5	5.48298	5.14875	4.52088	4.56936	4.54809	5.40839	5.30769	5.51626	4.99933	5.05334	4.86051
---	8.14377	8.07607	6.12695	5.76371	6.64416	7.64169	7.59002	7.61087	6.43089	7.14208	6.86368
CENPW	3.66018	2.53122	6.75121	6.49211	6.44431	2.79275	3.15537	3.44038	4.38491	6.00379	3.96144
DPY19L3	4.03564	4.29456	3.70851	2.90811	3.315	4.06135	4.37376	4.53833	6.33548	4.88257	5.30863
CTAG2	6.56926	6.45663	6.0903	6.12295	6.12935	6.5226	6.56221	6.60119	6.12108	6.33078	5.88447
---	8.77948	8.77565	10.8557	10.6207	11.0357	8.29671	7.8167	8.20952	8.9669	8.92971	8.41913
OGFR	7.20262	7.49428	7.36874	7.18185	7.25873	7.76885	7.83298	7.58665	7.22349	7.27258	7.36315
EXOSC10	5.42647	5.61299	7.46172	7.63565	7.9751	5.17062	4.93827	5.17626	5.75783	5.72774	5.46706
CENPF	2.77569	2.68452	2.80649	2.79472	2.80853	3.06565	2.55206	2.70573	3.06143	3.50504	3.47911
RPL35	7.48875	7.87369	11.1472	11.2185	11.3456	7.10576	7.04449	7.43457	8.28072	9.00334	7.52058
TMEM110-MUSTN1	6.04991	5.81045	6.2499	6.30648	6.52957	6.10621	5.91367	5.29037	7.7267	6.06513	7.61359
TBC1D21	3.85727	3.51367	3.12182	3.34232	3.34249	4.03247	3.8401	3.9025	3.21613	3.45966	3.57709
HSH2D	9.16235	9.46542	6.59392	7.39284	6.88632	8.47895	9.63209	9.29153	6.06867	8.1432	7.92225
TAAR5	3.10728	3.09561	2.99663	3.15188	3.1066	3.9226	3.73757	3.61911	3.08324	3.39089	3.41191
BST1	9.24958	9.2272	9.25065	9.23518	9.27769	9.17734	9.54366	9.43883	9.88934	9.68243	10.2668
ACBD6	4.48488	5.01269	6.42151	6.61067	6.61794	4.67787	4.61916	4.30359	5.52991	4.97477	5.10222
RHBDD1	5.64519	5.83985	7.40594	7.65256	7.63727	5.07243	5.2272	5.65216	6.39138	5.59698	6.31461
CHKA	4.75309	4.70461	5.49569	5.94275	6.01573	4.56706	4.50603	4.06871	6.75784	5.37317	4.98903
GMPPB	5.75957	5.62906	5.63226	5.46087	5.62958	5.9227	6.05986	6.00674	5.37299	5.77107	5.46147
MKNK1	9.43321	8.79883	8.4997	8.34188	8.45375	9.1945	9.35206	9.52856	10.6216	9.82195	9.98827
AK9	3.31796	3.27276	3.23595	3.38125	3.25311	3.18109	2.98407	3.2498	3.78127	3.3636	3.73299
ACTB	11.648	11.3985	11.3397	11.2795	11.3147	11.3525	11.6037	11.7471	12.3917	11.9383	12.0113
LGALS8	6.03911	5.52494	7.22769	6.95046	7.25734	5.5765	6.73984	6.59561	7.88463	7.03273	7.30341
HTT	4.87302	4.89468	7.10351	6.83108	6.91151	4.75933	4.97293	5.03129	6.66062	5.52366	5.45168
MYO1F	11.5997	11.6103	10.3247	10.2421	10.3099	11.4342	11.6028	11.7328	11.0637	11.1018	11.3224
SNORA60	6.87286	7.52982	6.73876	6.36058	6.47456	7.66369	7.92838	6.91139	6.82372	6.50164	6.35247
TGFBI	4.49736	4.41828	9.77478	9.92468	9.85431	4.628	4.61174	4.98224	4.18329	4.14629	4.4388
ARHGDIA	9.10835	9.31323	9.54993	9.42814	9.60623	8.75796	8.6291	8.7962	9.57879	9.94338	8.93435
RPL5	5.94074	5.64336	7.59959	7.76176	7.5338	5.47917	5.16464	5.70845	6.23404	6.6085	5.77435
SPDYE7P	6.3468	6.68821	5.85271	6.13157	5.90231	6.4386	6.82418	6.73546	5.86587	6.1366	6.27465
TBC1D9B	5.14059	5.02421	6.67539	6.77773	7.07542	5.07817	5.24682	5.25844	6.02845	5.73796	5.50089
C12orf65	4.26709	4.28851	4.02496	3.9915	3.9816	4.27462	4.2948	4.1271	3.89484	3.9198	3.77773
GFM1	3.49072	3.38326	6.26292	6.28822	6.15148	3.49335	3.26222	3.39219	4.55411	3.97031	3.67506
LNPEP	6.51667	6.07756	7.12311	7.1832	7.38982	6.59679	6.26453	6.93886	7.39545	7.13351	7.24043
NCOR1	8.11346	7.96085	8.14233	7.9387	8.13617	7.57551	7.71164	7.97115	8.09343	8.25079	8.60584
AGRP	5.41768	5.43288	5.27642	5.17624	5.22536	5.42496	5.4652	5.34156	4.84241	5.159	5.02069
PXDC1	3.59114	3.12963	3.69498	3.79589	3.80816	3.64879	3.90816	3.89979	3.24806	3.4706	3.14086
KBTBD2	8.02877	7.67215	6.968	7.20908	7.16124	8.07153	7.99384	8.12503	7.57612	7.68273	7.58556
HADHB	7.26509	7.05361	7.84116	7.91747	7.91102	7.04569	7.2424	7.51383	7.90678	7.65184	7.73714
HECTD3	5.93551	5.5964	6.40634	6.39398	6.89154	5.35516	5.28849	5.84025	6.60594	6.00994	6.16342
MED26	6.06684	6.35157	5.94864	6.01741	5.95039	5.24048	5.23869	5.61916	5.91171	6.15529	5.69615
CDK5RAP2	5.03217	5.02356	5.35268	5.07108	5.45534	4.56612	5.13239	4.91036	5.28671	5.57316	5.49998
---	3.37314	3.27463	2.94832	3.00723	2.95368	3.0162	2.98444	3.24484	3.55819	3.51167	3.38403
---	5.43606	5.31891	7.07448	7.05257	6.74992	5.15229	5.31654	4.54678	5.82664	5.58027	5.64079
ILF3	5.12153	5.52118	8.12084	8.13429	7.9205	4.3538	4.81607	4.53752	5.16678	5.91437	5.03496
CDYL	5.87093	5.67107	6.77277	6.24422	6.54358	4.88901	5.18152	5.51916	5.98539	5.61016	6.3357
EIF2S2P3	4.83554	4.83781	5.34164	5.17907	5.12115	4.62269	5.00682	4.98375	5.40073	5.74609	5.19273
---	5.74167	5.33864	6.60907	6.5816	6.83125	5.76078	5.61917	5.33234	5.07756	4.693	5.11749
---	3.94019	3.38902	3.56119	4.25315	3.41361	3.54484	3.22105	3.54399	6.02707	5.55458	3.78412
TMEM70	6.07626	5.15365	6.10106	6.55118	6.29463	5.24559	5.49145	6.20235	6.84411	6.64179	6.44026
TSPYL2	6.9697	7.63852	5.7782	6.51257	6.06895	6.51642	6.9222	6.57719	5.15303	6.29551	4.70356
GABBR1	5.61572	5.31556	7.65011	7.51168	7.56485	4.8312	5.62836	5.69003	5.88646	6.24556	6.80985
ASUN	3.13649	3.21342	5.32764	4.91452	5.47366	3.49018	3.42327	3.85587	5.85302	4.10513	4.62645
MAST4	4.54972	4.59603	4.17833	4.15001	4.2011	4.58979	4.69283	4.60231	5.68851	4.81189	5.34979
---	6.21496	6.09274	5.51021	5.14772	4.95921	6.08275	6.72185	6.53001	7.3345	6.83026	7.58671
RNF115	5.00369	4.53558	6.80817	6.52839	6.31392	4.41164	4.39735	4.655	6.00097	5.7601	4.74922
CNTF	5.59591	5.62777	6.02713	5.86342	5.85824	5.31358	5.4747	5.67212	6.09435	5.88046	5.84659
ATP5A1	5.88476	6.09866	8.31578	8.09524	8.35202	5.51243	5.30643	5.75044	7.21586	6.01377	6.19468
SMIM11B	4.60709	4.1015	6.41058	6.32925	6.30124	4.56965	4.39304	4.84114	5.28306	4.96402	5.41406
ZNF699	3.61029	4.17904	3.50147	3.45435	3.59418	3.63409	3.55911	3.59401	4.37316	3.98316	4.10723
RPL21	7.58506	7.53625	9.65462	9.86514	9.95398	7.45825	7.13487	7.45118	8.07786	8.10679	7.59467
SNRNP70	7.60115	7.66804	7.63384	7.51235	7.53659	7.4178	7.48897	7.79645	6.89159	7.14594	7.22428
---	9.59875	9.40824	10.0788	10.1866	10.2931	9.34354	9.40874	9.61049	10.3167	9.90791	9.77796
FHOD1	6.35196	6.43201	6.37014	6.34316	6.54648	5.72512	6.04766	6.3457	6.82919	7.3218	6.37178
SEL1L3	5.05256	4.72161	4.41636	4.30271	4.74275	4.67344	4.48593	4.96969	8.13994	5.44721	6.11205
SEC61A1	6.85467	6.95496	8.74184	8.55276	8.63583	6.45841	6.52335	6.96583	8.13149	7.28842	7.09333
SPP1	4.84688	5.55092	2.93328	3.2303	3.54839	5.07563	4.08426	5.15052	3.47167	3.99508	3.65672
PAGE5	5.65594	5.55237	5.34278	5.0714	5.1079	5.90289	5.8559	5.6407	5.42152	5.36796	5.32558
NDUFS1	5.43663	5.27585	6.34813	6.01201	6.32126	5.12334	5.27615	5.58568	5.87775	5.79122	5.8657
BRI3	5.08166	5.2233	4.99071	5.77197	5.06088	5.10025	5.69187	5.46948	6.07693	7.1629	6.19285
COPA	7.60573	7.43358	8.2733	8.04534	8.31142	7.22315	7.26109	7.69912	8.93603	7.72165	8.28948
---	7.0382	6.74254	6.27949	5.89447	6.17178	6.73697	7.01658	6.86011	6.13667	6.30396	6.5307
---	2.76424	3.2996	5.50108	5.55715	5.59948	4.05156	3.47557	3.96928	4.19252	5.07625	4.72482
RAB1A	9.68318	9.59306	9.32614	9.53691	9.18698	9.47777	9.25607	9.69543	10.1565	9.97799	9.86217
FAM217B	5.4774	5.40941	5.27446	5.18709	5.33926	5.54802	5.92995	5.9331	7.03406	5.98839	6.97113
---	8.63862	8.63656	11.1375	11.0237	10.8783	8.37916	8.06387	8.76307	9.34789	9.44489	8.7063
---	3.89974	4.39632	2.8236	3.30916	2.49155	4.65961	5.42869	4.47896	2.87392	3.17429	4.39084
---	1.80259	1.94222	2.34947	2.42072	2.2706	1.98138	1.99058	1.83161	2.24847	2.3085	2.40245
IFI30	10.1325	10.3207	11.5046	11.8054	11.5281	10.4586	10.7547	10.5186	11.0472	11.0589	10.9952
FAM20A	3.40644	3.75121	3.17067	3.47341	3.41434	3.71486	3.53922	3.52386	5.36682	3.77826	5.22293
ANXA1	8.76131	6.97456	11.5081	11.4225	11.0779	9.61043	8.61133	10.2499	11.7667	10.7408	11.1128
TOP1	8.34158	8.36026	7.49581	7.61221	7.6941	8.24283	8.45365	8.14616	7.69008	7.94057	7.89654
CLPTM1L	5.88469	5.68757	6.79805	6.72515	6.29138	5.29569	5.40753	5.5153	6.35914	5.93676	5.8048
RHPN1-AS1	4.06892	4.03912	3.91328	3.95283	3.89184	3.99749	3.8436	4.59617	4.84381	4.92789	4.58595
TMEM173	5.93525	5.47095	7.76646	7.72559	7.80538	5.75923	5.66807	6.12733	6.34621	6.48857	6.36087
TREML2	8.56365	8.74927	5.33913	5.29753	4.93608	8.58061	8.99528	9.39129	7.70329	8.59532	8.01895
HIST1H3G	2.68263	2.74678	2.48363	2.53725	2.51014	2.47824	2.39799	2.39482	2.78951	2.86264	2.68984
NUP98	8.54244	8.79063	7.42414	7.50326	7.45331	8.60134	8.74947	8.96858	8.02131	8.25221	8.48038
GNGT2	4.16634	4.5807	4.88933	5.06584	5.00885	4.75144	4.68459	4.74878	3.27928	4.43187	3.93445
RAB37	6.13693	6.05306	4.66247	4.63192	5.20285	5.85728	5.88591	6.25368	5.26474	5.5096	5.38775
CRLS1	5.24234	5.72486	6.86508	6.69032	6.4723	5.25713	5.39022	5.76082	6.86855	5.74258	6.74941
MBP	7.5573	7.79525	5.83976	5.73598	5.92256	7.37701	7.74681	8.08205	6.31009	7.40822	6.78019
KCNMA1	3.75559	3.48103	3.33828	3.70807	3.14658	3.6334	3.56329	3.80078	7.80002	3.94249	7.24855
TOR4A	5.96739	5.98685	6.42304	6.15333	6.49352	5.87351	6.05836	6.02608	6.59938	6.4192	6.30849
FAM132B	5.25774	5.20887	4.77196	4.75411	4.96707	5.15784	5.37066	5.23192	4.71767	4.73186	5.0028
HPGD	2.58285	2.63157	2.6368	2.42724	3.02594	2.81001	3.17669	2.93872	10.2151	3.44836	8.63103
---	5.90508	5.75847	6.62228	6.56064	6.92004	5.74928	5.9516	5.67144	7.57209	6.0018	7.11826
MAPRE1	8.88933	8.5901	8.59519	8.7362	8.35123	8.04387	8.54291	8.25968	9.24414	8.68549	8.87451
VPS4A	6.6648	6.64076	7.4605	7.18747	7.3276	6.30976	6.58758	6.6829	7.14238	6.82873	7.0748
GGH	3.36388	3.03945	3.79372	3.22454	3.36085	3.49327	3.2142	3.17203	3.61135	5.13765	4.48142
COX17	6.08426	6.46623	7.55215	7.46834	7.56463	6.07299	6.30208	6.81685	7.01152	7.12822	6.96492
---	4.4173	4.43341	5.77027	5.72172	6.17966	4.28243	4.44778	4.26278	4.7639	4.92263	4.76412
---	4.65349	4.1207	6.93088	7.15587	6.61379	4.01391	3.15945	3.59762	5.79842	4.50305	4.30934
EGR1	10.2735	9.5551	10.1281	10.3502	9.96663	8.2089	8.43778	9.15425	9.32636	10.4011	9.46384
MSTO1	5.40348	5.68836	5.29052	4.93116	5.2916	5.20958	5.85604	5.55499	3.94274	5.246	4.33798
---	4.15683	3.84554	3.85637	3.5651	4.15573	3.79578	4.24977	4.24199	3.23178	3.62061	2.32145
HLA-F	12.911	12.9758	12.1133	12.4032	12.1704	12.7416	12.6757	12.969	12.1412	12.3865	12.4421
LRRCC1	3.01516	3.13271	3.97391	3.82164	3.81036	3.00415	2.87597	3.05405	3.38389	3.37735	3.30524
PLK2	6.49658	6.69098	5.55296	6.23148	5.6902	4.57832	5.4609	4.32246	3.76133	3.85454	3.92173
SCCPDH	4.63085	4.85837	6.1233	6.02013	6.10268	4.12437	4.34514	4.57652	5.2013	4.63208	4.95853
PLBD1	9.81013	9.45385	10.1831	9.8675	9.48448	9.71036	9.57729	10.2683	11.0784	10.2883	10.9136
SMCHD1	11.0334	10.8569	7.93272	8.36367	7.77063	10.6959	11.0422	10.7387	8.85464	10.1506	10.1765
IL22	3.25754	3.17083	3.11527	3.08579	3.12409	3.59013	3.4011	3.51067	3.16543	3.072	3.18004
MAD2L2	6.42639	6.57238	6.65273	7.05185	6.98206	6.34584	6.51379	6.74819	7.57273	7.51211	6.76869
LZIC	6.41139	6.25278	6.57115	6.54394	6.75107	5.95859	5.86783	6.16716	6.65657	6.35229	6.38252
UBE3A	5.15857	4.83968	7.70596	7.54443	7.46574	5.02775	4.90077	5.31694	6.41536	5.80191	5.41608
FAM53B	7.04181	7.19387	6.37335	6.74918	6.5192	6.42111	6.6096	7.08839	5.93857	6.31924	5.83901
INIP	6.26254	6.23006	6.68873	6.70603	6.44545	6.28701	6.23063	6.36314	5.8845	5.99762	5.77046
SEC62	6.97992	7.05669	6.7123	6.50121	6.76276	7.41135	6.87463	7.46867	8.02034	7.58671	8.09941
RPS3	9.85457	10.2128	11.8421	11.6341	11.8345	9.43386	9.58593	9.78932	10.1494	10.2055	9.96257
CYSTM1	8.15269	8.17885	5.79723	6.32899	6.12758	7.92643	8.64223	8.60775	10.5856	9.03956	9.27683
TERF1	5.61508	6.70259	7.0172	7.03812	6.71762	5.76967	5.4468	6.1102	6.68975	6.52374	6.83084
CCL24	4.87831	4.44723	4.32243	4.60977	4.43994	5.02306	5.00014	4.92632	4.38652	4.58612	4.53215
KIAA0430	9.70011	9.42093	8.42566	8.30727	8.08969	9.28169	9.69333	9.66858	8.25463	8.76886	9.23186
SND1	5.17216	5.05013	7.66993	7.3482	7.73808	4.32245	5.25495	5.08687	5.85672	5.6974	5.47143
ABCB8	5.42931	5.29257	4.95502	4.86473	5.09779	5.28182	5.35606	5.3744	4.78577	5.01629	4.99357
---	4.6852	4.95186	4.35459	4.92288	4.19217	4.78712	4.92071	4.57097	5.20476	6.14963	5.54328
ELL	7.94511	8.2176	6.1498	6.41762	6.51788	7.82678	8.10978	8.1761	7.57344	7.57899	7.45412
ATP7B	4.52051	4.37907	3.37482	3.61582	3.65688	4.44081	4.79577	4.20496	3.59603	4.09442	3.89391
YIPF4	9.64887	9.57917	9.04349	9.13542	8.8211	9.4967	9.72281	9.60573	8.63818	9.021	9.35279
TFRC	4.00263	4.01709	5.21009	5.17001	5.7054	3.4675	3.68071	3.84892	6.23741	5.54056	3.92576
---	3.50295	3.41403	3.14353	3.30502	3.31055	3.89442	3.52353	3.669	3.37913	3.16369	3.21223
---	6.4472	6.24419	5.97702	5.89593	6.00093	6.3889	6.50052	6.48604	5.97812	6.2112	5.98641
HSPA4	6.0767	6.05792	6.88881	6.66108	6.92282	5.7505	5.50526	6.11292	6.34275	6.32466	6.29591
KIF27	6.84897	6.40517	4.97139	4.44003	4.55448	7.25299	6.09686	6.52318	5.06831	5.12726	6.14282
LRRN1	5.7353	5.00198	2.40445	2.84151	3.04741	5.69527	5.5273	6.7615	7.90742	6.52455	8.34492
LOC441081	7.16666	6.70227	8.1178	7.90084	8.44016	7.45399	8.13123	7.42962	9.68436	8.00406	9.25629
FGGY	5.25031	5.66043	4.71264	4.98166	4.99943	5.17493	5.53533	5.42363	5.96416	5.73391	6.26376
OR2W6P	4.44526	4.43869	3.34476	3.40098	3.71869	4.37217	5.0541	4.84206	3.8481	4.25705	4.19528
FAM110B	4.14661	4.02566	4.23118	4.09372	4.42003	4.13013	4.21267	3.97177	4.55363	4.41861	4.72706
C1orf189	4.38412	3.97166	3.59589	3.05379	2.88562	4.07401	4.84905	4.28298	2.97258	3.98576	3.11972
KDELR2	6.62301	6.79426	7.40546	7.54845	7.57022	6.27811	6.0715	6.54952	6.90993	6.96024	6.60242
KRIT1	5.71955	5.1032	6.77277	6.48472	6.61378	5.34347	5.17948	5.53878	5.99129	5.83583	5.99869
AMOTL2	4.45784	4.21808	3.49432	3.49403	3.42918	4.30124	4.15304	4.08653	3.44831	3.90651	3.74305
RNF214	4.55177	4.53492	5.8754	5.83351	5.78313	4.33844	4.41018	4.69124	5.26598	4.66871	5.2666
IGKV1D-33	4.22577	4.17144	4.18041	3.74836	4.31953	4.71754	4.79675	4.18018	4.11072	3.80069	3.68618
TNRC18	6.80027	6.9782	6.30943	6.1665	6.4046	6.87052	7.23843	6.9842	6.54932	6.59641	6.61799
ACTG1	11.6434	11.6445	11.6321	11.6134	11.7159	11.4863	11.5685	11.6268	12.0718	11.9991	11.7834
SP2	6.60819	6.92763	6.18387	6.2111	5.99751	6.49766	6.78334	6.70344	5.93417	6.20659	6.31817
SLC10A7	4.53264	4.78257	5.41392	6.08762	6.01915	3.99595	4.39499	3.98611	6.12305	4.57502	5.16967
---	3.10564	2.98212	3.28713	3.10274	3.29805	3.78348	3.61512	3.66542	3.40723	2.98947	3.2853
ATP6V1F	7.84515	7.88651	9.48492	9.59582	9.69438	7.68875	7.88247	7.75781	8.59215	8.30066	8.0001
CASS4	7.64923	7.88555	5.12027	4.76569	3.90861	6.95623	8.06019	7.84783	5.44888	7.05808	5.75936
SLC6A10P	6.05536	5.69642	5.48651	5.38431	5.25465	5.88703	5.71529	5.74844	5.26342	5.43801	5.30556
CLDN15	5.74415	5.88505	5.37288	5.11837	5.55714	6.13709	6.26521	6.11371	5.55971	5.78297	5.76419
SNRK	9.37439	9.48495	7.6364	7.88318	7.60451	9.63972	9.468	9.502	8.67811	8.93648	9.3141
ADRA2A	4.38319	4.38831	4.14527	4.09051	4.09795	4.6855	4.70478	4.56506	4.22869	4.41323	4.21282
SUSD1	5.43655	5.70352	7.86855	7.7269	7.33705	5.43729	5.69027	5.55491	6.84734	5.79671	6.60051
ADGRE5	11.6741	11.4282	10.6123	10.4308	10.4965	11.4223	11.6497	11.8465	11.1359	10.9881	11.3031
ERG	4.23563	4.05811	3.84147	3.57157	3.45035	4.43912	3.73283	4.1118	4.33433	5.64676	5.8963
ADGRA1	4.59689	4.42863	4.36891	4.15035	4.38117	4.70981	4.78053	4.73863	4.28576	4.32358	4.44293
PSMD12	5.21681	5.30326	5.94498	5.97679	6.08505	4.70299	4.89121	5.25037	5.6103	5.55314	5.27517
ARHGAP25	9.59224	9.64294	6.73865	7.05272	7.01914	9.13169	9.5588	9.41192	8.05289	8.60183	9.07988
GGT1	7.75071	8.12095	7.55788	7.40283	7.47871	7.61059	7.52732	7.97703	8.28239	8.25164	8.12229
AGA	5.23325	4.85881	8.28305	7.40076	7.9984	5.7549	4.27315	5.5021	7.55087	6.33552	6.16968
RBBP4	6.72287	6.92496	8.77804	8.15062	8.69218	6.33988	6.35016	6.81462	7.49845	7.01661	7.11906
SCARNA9L	5.86317	6.07997	5.69288	5.86092	5.30654	6.30122	7.42972	6.66127	5.28356	5.91561	6.13248
LINC00528	10.1636	9.99188	7.3724	7.5076	7.00713	9.46784	10.3977	9.81543	7.90454	9.58343	8.2202
CADM4	5.42	5.44879	5.00904	4.87235	4.99548	5.67017	5.72152	5.45292	4.87248	5.08151	5.39425
CYTH2	6.73506	7.04297	5.48125	5.97147	5.73147	6.94987	7.16511	6.50788	5.56987	6.24307	6.3517
---	3.25919	3.11639	2.99816	3.20011	3.15842	3.90691	3.36077	3.23706	2.9022	2.91427	2.98037
RAB8B	7.98455	8.31961	7.31842	7.11904	7.18809	8.15486	8.15826	8.22876	8.78226	8.72876	8.4334
---	3.62692	3.83969	3.61626	3.27878	3.45703	4.20639	4.06149	3.62305	3.35727	3.42138	3.44916
ZBTB14	3.96424	3.8887	5.21109	4.90211	5.24905	4.21973	3.92475	3.7028	4.83578	4.2668	4.60879
ANXA7	6.6969	6.41735	7.11314	7.35217	7.03497	6.35685	6.12057	6.86885	7.11458	7.42292	6.91586
CORO1B	6.49655	6.2872	6.13984	6.25087	6.52888	6.26569	6.33643	6.53173	5.60734	6.00623	5.93727
AHCTF1	8.09974	8.02129	6.00764	5.99336	5.91125	7.61519	7.89163	8.0346	6.53008	7.21283	7.53015
ACAD8	4.92724	4.96394	5.27369	4.59597	5.01001	4.54181	5.22147	5.27912	6.33805	5.488	5.90727
DMXL1	4.61496	4.70525	6.19676	5.81184	6.0706	4.15415	4.51815	4.73295	5.36102	4.74256	5.55692
MAP4	4.97159	4.87889	6.12411	5.96975	6.07089	5.01285	4.9592	5.09281	7.03364	5.54028	5.69151
MTX2	2.59506	2.68485	5.21619	5.48527	5.41049	2.60667	2.71259	2.85406	3.83041	2.88088	3.70416
DSTN	5.70208	5.08989	5.46528	5.58104	5.78488	4.96827	4.60121	4.75797	5.72323	5.47453	5.15619
NCOA7	4.75081	4.39029	5.07714	5.57271	5.3621	5.36542	4.98428	5.03934	5.52345	5.75573	6.1846
CD300LB	8.01468	7.42814	7.88686	7.90295	7.66884	6.68913	6.89408	6.66771	5.46884	6.51962	5.66333
SORT1	6.87855	6.43672	8.00373	7.58733	8.02572	7.65899	6.85748	7.5915	10.7553	7.85819	9.27302
ESPNP	5.71654	5.43148	4.59366	4.98893	4.85586	5.36608	5.42882	5.04932	4.36179	4.88075	4.77678
CHP1	9.24723	9.3081	10.126	9.89608	9.90439	8.84883	8.92352	9.17254	10.1443	9.61673	9.25207
---	6.59786	6.96088	6.05187	5.36003	5.54788	6.06733	6.30903	6.55684	7.90489	6.61981	7.54418
IDSP1	10.6389	10.2931	8.98759	8.71408	8.78329	10.3715	10.3328	11.031	9.90549	10.0933	9.64887
LOC441081	7.16584	6.75648	8.25119	7.899	8.50366	7.32918	8.00105	8.06397	9.93196	8.06926	9.88295
PIGB	7.65884	7.65898	5.47155	5.14696	5.01667	6.71865	7.60915	8.12808	5.81378	6.93561	6.08211
HIST2H2BF	9.85683	9.52157	6.32195	7.73552	6.87167	9.3818	9.77169	9.93506	7.33663	9.19609	7.94123
PECR	3.99444	4.10879	4.03604	4.1948	3.96612	4.43275	4.29478	4.80961	6.26464	4.69468	6.6773
ZNF138	5.09236	5.65767	5.06894	4.57977	4.5992	5.17483	5.55828	4.95919	4.51962	4.38358	4.66093
PNPLA1	5.81593	6.28039	5.10855	5.35592	5.22609	5.96168	5.92092	6.04809	6.22094	6.76913	7.1753
GTF2IRD2B	5.04794	5.1133	5.53664	5.15767	5.47645	5.14735	4.73624	4.85475	5.49997	5.22672	5.74422
UBOX5	6.55201	6.86133	6.41923	6.31029	6.30246	6.48934	6.22851	6.2376	6.923	6.79489	6.6206
THUMPD3	6.1188	5.66844	6.29115	6.89966	6.69766	4.57061	4.54034	5.37475	6.26486	6.35039	5.21893
LOC105371114	4.19646	3.96364	3.23221	2.85844	3.41256	4.06649	3.80624	3.65979	3.16214	3.37938	3.28544
---	9.30615	9.31037	9.97561	10.2737	9.88511	9.21607	9.22743	9.2023	9.92508	9.48049	10.5448
---	7.96834	8.20116	11.8309	11.7197	11.7612	6.93059	7.33806	8.00163	8.73069	9.09527	7.7866
PRAF2	7.03391	7.61268	5.50173	5.72904	5.72983	7.1814	7.71355	7.48122	6.43003	7.13614	6.53474
MIR103A2	7.16206	6.78577	5.58719	5.92239	5.23026	6.88354	6.77022	7.38459	5.54305	6.66795	5.82406
TRPV2	5.12264	5.21231	5.99458	5.91747	6.17571	4.79406	5.07705	5.51565	6.31248	5.43329	6.01396
---	5.84922	5.82631	6.83325	6.69975	6.45075	5.89886	5.83043	5.79953	6.36197	6.30293	6.14422
YPEL3	9.49586	9.4492	7.3047	7.15109	7.03933	9.58478	9.54458	9.45328	8.24411	9.04077	9.16266
APOL6	6.91685	7.08873	6.61021	7.04441	6.8261	7.31357	8.37018	7.11449	5.77359	6.71016	6.82481
FBXW4P1	6.03393	6.08706	5.47656	5.5641	5.83835	5.6803	5.60379	5.97658	6.42622	6.32942	6.05894
---	3.02133	2.66002	2.10389	2.30443	2.00874	3.01531	2.68637	3.02222	2.29236	2.30804	2.55695
RAB3GAP2	5.7902	5.59257	5.9952	6.2119	6.07751	5.67906	5.68246	6.29029	6.89599	6.24279	6.58566
TTLL10	5.75077	5.69929	5.47838	5.39477	5.58986	6.18206	6.01818	5.94799	5.69286	5.68517	5.64477
UBN1	7.99463	8.30769	5.70929	5.94798	6.31908	8.03808	8.31864	8.28828	6.5579	7.26433	7.87989
PDE4B	7.75279	8.43357	6.37583	6.96714	6.57571	8.46489	8.32014	8.64129	6.18428	8.16593	6.89968
AGO2	7.71016	7.84851	6.39701	6.62765	6.79996	7.8553	7.6711	8.1021	6.521	7.41272	7.35525
VPS41	6.88942	6.92776	6.93738	6.978	6.55442	6.71304	6.40205	6.72282	6.32451	5.94747	5.86003
SLC2A1	6.80486	6.87194	5.61833	5.5754	5.93439	5.89685	5.78435	6.73372	6.55192	7.26481	7.35733
RAB10	8.38653	8.37096	8.71334	8.77995	9.08429	8.10717	8.62033	8.88757	9.02502	9.36837	9.20355
NR2C2	7.29808	7.38224	6.90936	6.58476	6.72716	7.64132	7.54742	7.59581	7.18252	7.01133	7.31279
RPL21	7.63884	7.5772	9.73302	9.90198	10.0566	7.49035	7.21079	7.53114	8.12718	8.15555	7.6332
QRICH1	7.27405	7.1426	8.00899	7.86644	8.00956	6.37505	6.73758	6.94759	7.31835	7.41506	7.00192
RPS6	10.12	10.2141	12.0524	12.0982	11.9703	9.76507	9.8233	10.0406	10.3347	10.8125	10.1581
TCAIM	4.41592	3.91556	4.8197	5.06311	5.10413	4.21261	4.18671	4.23193	5.57326	4.47816	5.04012
DPY30	7.92587	7.55383	8.25409	8.31614	8.22389	7.07436	7.17291	7.86997	7.89961	8.02285	8.32803
NIPSNAP3A	3.94245	3.74632	6.73115	6.53041	6.75942	3.55706	3.82754	4.10093	4.99313	5.5461	4.06123
ATP5J2	7.64012	7.43153	8.81631	8.94563	8.83559	7.52632	7.52695	7.52782	8.52851	7.85478	7.91917
SYNE3	5.98583	5.81623	7.20025	6.75768	6.98809	6.09055	5.64255	5.99643	6.53833	6.25352	6.67575
HOXA1	4.30408	4.96898	3.38605	3.84288	3.89345	3.96283	4.86353	4.3971	3.42866	3.77771	3.44252
OPA1	4.92539	4.87601	6.3215	6.15003	6.17601	4.38124	4.51532	5.0732	5.8683	5.40298	5.00289
---	10.2605	10.3279	10.9552	11.1603	10.9332	10.2153	10.3226	10.2313	10.9319	10.4509	11.3426
---	5.09974	4.4826	3.9463	3.37158	4.04173	4.94623	4.98143	4.87391	3.75084	4.19304	4.46993
C18orf25	6.6094	6.48972	5.70594	5.81995	5.47708	7.09163	6.85204	7.16233	6.55552	6.37304	6.72093
ATP9A	3.91358	3.82976	3.46927	3.6097	3.47795	3.99582	3.97432	3.86568	7.00216	4.09527	6.44448
---	4.5042	4.68959	4.16616	3.77949	4.07776	4.52116	4.41277	4.73331	4.07122	4.12666	4.07646
CFAP45	6.5066	6.30101	3.878	4.21188	4.24746	6.79289	6.53107	7.4425	4.66081	6.47103	5.70571
CCL5	5.54258	5.64638	4.37672	4.64696	4.51859	4.93921	5.18533	5.01612	4.34889	4.75416	4.63159
PRH2	2.40216	2.37067	2.18901	2.23448	2.58199	2.73732	2.66027	2.72074	2.2024	2.27584	2.36042
RPL21	7.47182	7.37267	9.45083	9.64558	9.72555	7.33983	7.05793	7.28253	7.94116	7.91816	7.43276
---	4.51222	4.32185	4.09803	4.22893	4.42409	4.99336	4.44343	4.57313	4.20872	4.13233	4.07279
PLEKHG6	4.93075	4.64562	4.389	4.24139	4.22251	4.79654	5.02161	4.86213	4.50467	4.56569	4.26727
RBM5	9.61983	9.49815	8.82979	8.7285	8.72633	9.37287	9.63652	9.87728	9.06754	9.03785	9.31293
BTN3A2	8.44076	8.95146	7.67864	7.90416	8.47109	8.75015	9.01724	8.61256	5.24101	7.91388	7.54603
PSMC5	6.23566	6.57716	7.98677	7.97773	8.00649	5.80805	6.1862	6.39795	7.2436	6.85518	6.44045
KCNAB3	4.55518	4.48102	4.23523	4.29083	4.41619	4.5584	4.32765	4.2241	4.90793	4.67773	4.79274
DSE	6.46842	5.71229	7.44257	7.48593	7.48156	6.44885	6.57336	7.12737	7.02961	8.54295	8.12027
PTPN1	7.65489	7.40731	7.55919	7.51197	7.69081	7.84877	7.68999	7.66982	9.52611	8.21501	8.33965
---	2.43658	2.73932	2.42187	2.84422	2.31137	3.00228	3.11558	2.73574	2.3243	2.1632	2.55674
USE1	6.29976	6.07186	6.74353	6.76376	6.71358	5.84116	5.61891	5.66519	6.10774	6.23336	5.99401
FCGRT	9.84116	9.60909	9.46114	9.60276	9.35904	9.69069	9.64381	10.044	9.03486	9.50481	9.20722
TRIM38	8.20477	8.30401	8.01384	8.14618	8.20524	8.02718	8.77907	8.31817	7.067	7.75695	7.92097
---	5.99939	4.44886	6.21992	4.77082	4.21532	5.00816	3.55058	3.79245	6.01001	5.99762	5.90698
ACP5	4.0956	4.48752	4.51106	4.60205	5.24031	4.44878	4.71806	4.71255	3.98103	3.99816	3.94728
ATL2	5.28403	6.15891	6.00774	5.55787	5.80022	4.52905	4.64312	4.90503	5.73456	5.43467	5.2348
ABHD4	8.02161	7.81841	5.95032	6.77845	6.82184	8.09984	8.00956	8.083	7.25599	7.52608	7.27897
KPNB1	8.6486	8.68997	7.47399	7.37487	7.25678	8.73473	9.34696	8.91125	7.66087	8.1588	8.71604
CT83	3.60012	3.5785	3.11676	2.66609	3.17618	3.47599	3.68442	3.99227	3.29624	2.82182	3.14049
RBM23	8.9881	8.96177	7.60202	7.63532	7.51898	8.77517	8.86168	9.08198	8.08334	8.51819	8.60003
SMIM19	5.56126	5.51242	7.43092	7.32286	7.31829	5.94762	5.05767	5.75737	7.02072	6.31937	6.07314
RAB6C	5.69824	5.94752	6.23954	6.09213	6.18846	5.89168	5.65235	5.93076	6.68947	6.07744	6.35686
DLEC1	4.95956	4.63739	4.44856	4.22671	4.39225	5.02335	4.78176	5.51007	4.51563	4.36591	4.58929
---	5.68936	5.87505	3.84066	4.16351	4.16235	5.52432	5.81275	5.74744	4.99648	4.86024	5.46604
PRKAR2A	6.30487	6.12946	6.69766	6.52738	6.48206	6.09613	5.89544	6.12593	7.87673	6.26997	7.11029
CYFIP2	7.53514	7.30859	6.06179	6.12401	6.22829	6.82548	7.62903	7.90908	7.98376	8.43683	8.43558
SREK1IP1	2.43413	2.69318	3.42375	3.63673	3.64321	2.82489	2.81765	2.74383	3.18298	3.27257	4.09805
NTMT1	5.55015	5.84071	7.07207	6.74827	6.68396	6.10137	5.84347	5.71617	5.42957	5.36915	5.35183
CTNNBL1	4.54347	4.71713	6.46338	6.48383	6.68084	4.7339	4.44307	4.64068	5.90841	5.1111	4.9836
ERVH-6	3.54616	3.60886	3.63549	3.54031	3.2238	3.72389	3.72548	3.56542	3.31275	3.05379	3.27129
CYP19A1	3.07969	3.13486	2.62216	3.07475	2.85825	3.1704	2.92577	2.96142	5.67886	3.17638	5.18298
MRPS31	5.13387	5.45573	6.4596	6.45565	6.39995	5.1076	5.18182	5.55918	6.58403	5.48739	6.26482
VPS53	6.72856	6.71037	7.2006	7.00531	7.697	6.20511	6.36519	6.48952	6.8191	7.29441	6.87521
EBPL	6.23249	6.6503	6.69871	6.424	6.8401	6.55759	6.26157	6.74036	7.15303	7.29515	6.92401
ZNF23	2.67595	2.77686	3.14524	3.16768	3.03005	3.32112	3.03441	3.12244	2.78878	2.76728	2.78297
MCU	7.32278	7.41953	6.9983	6.33316	6.85343	7.36483	7.08839	7.78873	7.88395	8.31171	8.25103
ITGA7	4.27269	4.25967	4.0755	4.05517	3.86377	4.11896	4.10152	4.07627	5.33114	4.65168	7.20486
ZNF444	5.6528	5.67356	5.39827	5.40795	5.49565	5.99761	5.84183	5.6345	5.27679	5.25353	5.58847
CCDC153	7.2209	7.6455	6.08748	5.95802	6.45322	6.96735	7.27164	7.38472	6.11893	6.47145	6.85638
SRSF8	3.78683	3.77445	3.92332	3.73871	3.7762	4.10455	4.09349	3.81987	3.49486	3.7652	3.4058
BLM	3.27545	3.5769	4.07621	3.59365	4.49604	3.55071	3.5069	3.38472	4.02586	4.83983	4.12971
KBTBD6	4.982	4.70851	5.24341	4.67132	5.06567	5.12609	5.04754	6.01346	7.32141	5.85543	6.62012
PSORS1C3	3.78002	3.4994	3.74789	3.16299	3.03643	4.52176	4.68724	4.30412	3.5965	3.58606	4.13626
PSORS1C3	3.78002	3.4994	3.74789	3.16299	3.03643	4.52176	4.68724	4.30412	3.5965	3.58606	4.13626
CCDC12	6.28048	6.01477	7.23794	7.28673	7.29505	6.01975	6.41401	6.49707	6.7888	6.67564	6.99556
MMP9	9.99251	10.1569	4.8017	4.49777	4.78248	10.1104	9.43203	10.6684	12.0481	10.3847	12.2328
SEC22C	4.43712	4.88091	5.48215	5.6224	5.42681	4.50052	4.80976	5.18579	6.61922	5.4918	5.40979
DPP9	5.6934	5.53084	6.75861	6.7514	6.42345	5.49009	5.51426	5.83325	6.56061	6.00873	6.04977
---	5.04176	5.01431	5.08447	5.61229	5.83831	4.69387	5.42108	4.92958	6.00766	5.76046	5.57107
AGO3	7.37165	7.67721	7.18987	7.02819	7.29981	7.11583	7.21355	7.28055	6.719	6.91562	6.31492
TMEM106A	6.14185	6.15282	7.98693	8.14708	7.74965	5.91769	6.01402	6.15804	3.83189	5.29876	5.47214
SLC6A16	4.7931	5.20033	3.99625	4.27466	4.39509	4.46064	5.26617	4.72298	5.79547	5.30194	5.58136
---	4.88694	4.55393	4.03032	4.28341	4.0739	5.70655	5.30386	4.65799	4.20482	4.63627	4.4329
---	5.1457	5.46751	4.42911	4.16778	4.61952	5.19818	5.13434	4.84848	4.53707	4.47558	4.61389
SCYL3	5.3658	5.75771	4.69074	5.11318	4.63682	5.88755	6.01928	6.08375	4.9351	5.2908	5.6948
PIK3CD	8.23014	8.36336	6.53254	6.77674	6.86847	8.3188	8.77416	8.7511	7.88189	7.83331	8.338
---	3.8575	4.00789	3.72754	3.73294	4.1788	3.89218	3.38346	3.84332	4.15047	4.25786	4.66987
ZNF597	4.58684	4.50977	4.67033	4.88617	4.83397	4.64456	4.38272	4.95195	5.14157	5.20177	5.10597
WWP1	5.55725	5.56011	7.71357	7.58232	7.75868	5.31553	5.86252	5.8191	6.18517	6.17107	6.1282
LMBR1	4.86805	4.61034	4.93934	4.89474	5.35121	4.70073	4.56413	4.99453	5.67743	5.01047	5.70462
SNORD48	9.05995	8.95366	7.84732	7.4625	6.68829	8.93556	9.79451	9.10557	8.26674	8.00166	8.55308
AIMP2	5.33644	5.48537	8.24012	8.03021	8.37458	5.04019	5.10912	5.16953	5.5932	5.50954	5.43708
STX8	4.82215	5.17434	7.05192	7.30305	7.22431	5.46198	5.31132	5.35052	6.93305	5.55838	6.43
---	2.15831	1.98614	1.83757	1.90804	2.07379	2.4481	2.44613	2.27367	2.07032	1.8518	2.02773
GART	4.80175	4.31335	6.0652	5.86604	5.68267	4.50628	4.50975	4.35322	5.53515	4.94574	4.87252
TTYH2	5.34207	5.24448	7.41061	7.42523	7.15655	5.16231	5.34767	5.23329	4.95066	4.8294	4.75603
HCRTR1	5.23357	5.2541	4.94247	4.95058	4.84843	5.61111	5.27492	5.29459	5.00781	5.07461	4.83901
DPP3	5.3365	5.3402	5.70194	5.94985	5.83859	4.77946	4.86273	4.9665	6.07698	5.19826	5.34651
TMEM187	5.39365	5.30575	5.56439	5.63245	5.70264	5.51417	5.52457	5.16833	6.43983	5.72126	5.87607
SPTSSA	3.51001	3.005	5.69859	5.55409	4.98598	3.42896	2.90307	2.91949	4.56824	3.42523	5.35423
TRRAP	6.51249	6.68193	7.10652	6.77411	7.08729	5.95196	6.37499	6.29354	6.82188	6.52979	6.84032
SLU7	7.91485	8.15113	7.24756	7.2225	7.31374	8.08	8.05344	7.97917	7.53204	7.72004	7.72426
C7orf26	7.39877	7.24188	7.36542	7.50178	7.25458	6.67526	6.47984	6.94627	7.07039	7.43929	7.13251
2018-09-02	5.92533	6.12713	6.79905	6.86973	6.63211	5.86388	5.74579	5.93725	6.18974	6.18248	6.5099
ABL1	4.86611	5.05843	6.43068	6.16457	6.4057	5.04193	5.10796	4.95541	5.68318	5.33798	5.41889
TRAPPC4	6.99439	7.10778	6.91262	6.97504	6.96046	6.90204	6.70217	7.20794	7.61839	7.89023	7.16916
HMG20A	3.80276	3.7781	5.41296	5.33431	5.57476	3.95289	3.77332	3.93813	4.2099	4.21229	4.44931
MAFB	6.2419	5.55037	8.14541	8.39537	7.87316	5.43987	5.58393	5.96177	6.3481	6.8625	6.18801
MYL6B	5.32496	5.38512	5.1827	4.93436	5.2408	5.12656	5.06005	5.1806	5.85461	5.41679	5.50246
CD81	5.24511	4.52075	7.33208	7.10067	6.99192	4.97158	4.89996	5.02789	4.32822	4.45711	4.36262
---	4.48233	5.08155	3.13898	3.86491	2.912	5.34831	5.98629	5.14111	3.37651	3.8237	5.07613
SLC35A1	5.2366	5.21775	7.55886	7.29771	7.28557	5.52452	4.85962	5.74756	6.90709	6.42633	5.7169
GRPEL1	6.63215	6.67039	7.10265	7.33217	7.26099	6.41608	6.21462	6.57889	7.62372	7.63191	6.53022
SNORD141A	10.3717	10.4067	12.47	12.4023	12.285	9.65674	10.0022	10.1384	10.8031	10.6027	10.1664
TOR1AIP1	8.20718	8.12668	7.81987	7.77377	7.55604	8.03643	8.1607	8.24112	8.84121	8.47333	8.48659
RAP1GDS1	2.99825	3.0854	5.66364	5.61121	4.82688	3.21623	3.15726	3.05108	5.40496	3.38509	4.84244
ARHGAP18	5.03975	5.19938	6.00067	5.34844	6.2732	4.99739	4.90063	5.5587	6.80154	5.66926	6.09302
RPS14	10.6879	10.5292	12.008	11.9724	11.8346	10.4652	10.2692	10.4412	11.2211	11.1955	10.5351
PIGS	7.23734	7.61462	8.14672	7.84884	7.97618	7.15637	7.2504	6.90726	8.02873	7.73334	7.38443
ROR1	4.13221	3.75153	3.58364	3.49003	3.48214	4.17603	3.94944	3.83165	3.56254	3.50553	3.54953
---	8.18393	8.40386	9.5683	9.75062	9.68273	7.94474	7.84814	7.99721	8.85974	8.4589	8.15243
ALDH3A2	4.54738	4.18788	5.86068	6.14152	5.71903	4.43656	4.2988	4.59896	4.89727	5.16794	4.86082
IFT57	4.55525	4.78785	5.7977	6.1073	5.39971	4.48761	4.47213	4.8951	5.85954	5.22708	5.10766
PHACTR2	4.48856	4.67956	5.72366	6.12881	5.92346	4.53872	4.4786	5.40829	6.59295	5.10965	6.31071
LOC441081	7.13559	6.76504	8.17701	7.90312	8.49621	7.47656	8.15265	7.69192	9.80894	7.99855	9.50381
PRDM8	6.50842	6.38044	5.4303	5.16372	5.11287	6.42526	6.54306	6.44695	5.57633	6.22059	5.97487
NLK	6.06383	6.22348	6.65439	6.8768	6.53937	5.64247	6.08601	6.84957	7.33486	6.69506	7.35195
MEF2A	7.06216	6.24104	7.6512	7.60441	8.05835	7.55574	7.05738	7.33699	8.87321	7.59066	9.17192
EPHB1	7.61437	7.18797	4.24331	4.51638	4.34256	6.7272	7.92518	7.4892	4.69028	6.93878	5.77468
---	5.26976	5.2216	6.47213	6.23283	6.64287	4.88056	4.69141	5.14616	5.71206	5.4339	5.24448
CCNJL	7.83934	7.59751	4.97547	4.29254	4.37233	8.06067	8.35952	8.28753	7.08393	7.3899	7.91352
ZC3H3	5.79362	5.882	5.19893	5.25808	5.23075	5.95717	5.81701	5.9435	6.91212	6.02698	6.70774
HLA-F	12.9238	12.9442	12.0939	12.4043	12.238	12.7239	12.6718	12.9035	12.1269	12.3953	12.4509
U2AF2	6.40017	6.74703	6.63942	6.70337	6.8444	6.41401	6.65143	6.58511	5.83678	6.27658	6.05117
DNM1P34	5.87664	5.89329	5.67337	5.70622	5.59462	6.12122	5.96973	5.99855	5.4406	5.8208	5.61712
CD1C	3.6917	3.31918	6.39461	6.16986	5.78541	3.19218	3.83601	4.49638	2.96534	2.86375	2.87431
ZNF775	6.68736	6.60058	6.32496	6.59626	6.50465	6.89309	6.8182	6.73397	6.27907	6.4102	6.54848
DDX56	5.75703	6.03987	7.25884	7.44766	7.28268	5.41972	5.01344	5.31123	6.42746	5.95052	5.50042
AEBP2	6.699	6.81434	7.36715	7.29986	7.40218	6.60888	6.74289	6.56466	7.1365	6.83348	7.43877
WDR5	4.56155	4.63301	6.50422	6.82174	6.68669	4.15332	4.43045	4.51613	4.53215	5.36001	5.29549
KDELR3	2.87502	2.64782	2.51958	2.76515	2.73474	2.78581	2.98067	3.05217	2.56996	2.45832	2.54355
GGT5	5.90323	6.03552	5.22433	5.08668	5.169	5.74251	6.20178	5.51995	5.347	5.29991	5.20782
PDE3B	7.04904	7.59983	4.97927	5.38633	4.97935	7.34661	7.16045	7.15485	6.15087	6.04948	6.9941
TXNDC15	5.11986	5.40148	6.78197	6.58148	6.685	5.51008	4.85218	5.58739	6.21286	5.85232	5.85144
---	3.15945	3.68481	2.20883	2.31156	2.12832	6.1751	2.99246	3.46193	1.93458	2.20621	2.20588
---	4.17302	4.48351	2.66595	2.79848	3.8001	5.91888	5.20586	5.15407	4.11627	4.14102	4.81145
LGALS1	6.77558	7.22311	11.164	10.9886	11.1858	7.27637	7.19183	7.88392	10.4275	7.97493	8.76802
SERBP1	4.84788	4.88515	7.18894	6.89812	6.98153	5.20662	4.89353	4.9925	5.85531	5.26408	5.58348
IDI1	7.14849	7.22887	6.4809	6.42619	6.21771	7.44069	7.13175	7.645	9.61178	8.04519	8.05684
IPP	3.42705	4.13668	3.30851	2.83431	2.98863	3.00649	3.31722	3.87888	4.98116	3.78374	4.69218
---	2.32209	2.24515	2.15474	2.03529	2.18647	2.35479	2.48285	2.37142	1.95482	1.90753	2.19302
FCRL1	4.79639	4.77614	4.51422	3.93296	4.34036	4.51284	5.08457	4.91862	5.41206	5.30955	5.66945
---	4.37649	4.2666	4.04409	3.82911	3.90331	4.71908	4.36492	4.34946	4.0594	3.99868	4.09414
DUSP8	4.99448	5.08065	4.96507	5.0942	4.70219	5.25806	5.40484	5.14607	4.93782	4.84511	4.66583
SPINT1	6.70758	7.31305	6.80745	6.78015	6.73951	6.18214	6.6492	6.72999	5.54925	6.10745	5.87412
PPP1R9A	3.14853	3.07176	2.68897	2.76932	2.80367	3.26112	2.91232	3.22158	2.6973	2.65678	2.82191
BCAS2	7.49337	7.67722	7.01696	7.21935	7.20329	7.23152	7.28161	7.20714	6.95212	6.79765	6.20021
---	3.19738	3.66567	4.89913	4.60658	4.72884	3.05444	3.44985	3.42517	5.23532	3.8539	3.97133
---	3.19738	3.66567	4.89913	4.60658	4.72884	3.05444	3.44985	3.42517	5.23532	3.8539	3.97133
BCL2L1	6.35616	6.86472	6.25053	6.41629	6.56295	6.41303	6.89818	6.80289	7.75117	7.17034	7.22122
CATSPERG	4.17738	4.08924	4.05261	4.11606	4.21056	4.52594	4.4293	4.3479	3.93746	4.11923	4.13811
GAP43	3.87945	3.91223	3.62669	3.50529	3.59893	3.83821	4.04476	3.86607	3.53854	3.59053	3.57506
SLC9A9	3.84086	3.77779	7.24019	7.44592	7.27579	3.58572	3.20069	3.74511	6.87758	3.84769	5.35239
---	3.70432	3.85944	3.64588	3.59713	3.5408	3.72662	3.50353	3.73469	3.33801	3.30039	3.20779
SGF29	5.69667	5.65077	6.96049	7.02781	6.90372	5.39476	6.20892	6.26982	6.5621	6.5272	7.32771
ZDHHC16	5.74321	5.67649	7.18771	7.79216	7.80991	5.48216	5.52826	6.10297	7.18097	6.49902	6.15003
CHRNA10	5.48147	5.1567	4.12472	3.99858	4.31922	5.14763	5.27517	5.21537	4.47817	4.39482	5.02368
WDR82	7.35809	7.09585	7.02328	7.54335	7.17214	7.33475	7.10717	7.06268	6.80158	6.13712	6.63324
ACADM	4.22933	5.34249	6.43532	6.88203	7.05716	4.91452	5.11355	5.29236	6.56545	5.63318	6.15309
ZAK	3.85735	4.11449	6.05827	6.07026	5.64562	4.40062	4.65276	5.10415	5.43752	5.15686	6.16686
CSGALNACT2	7.16401	7.63377	7.60532	7.77145	7.41218	8.06772	6.66057	7.56823	9.48398	7.80643	9.46385
RSRP1	9.67356	9.47247	9.1094	9.12446	9.22281	9.15105	9.39096	9.69856	9.16525	8.70718	8.62577
USP4	7.92113	7.46897	5.97147	5.83494	5.80901	7.82851	7.47114	8.19028	6.19561	6.71667	7.55881
OR52K3P	9.01374	8.88834	8.06133	7.56354	7.66374	8.12402	9.16582	9.20391	6.99681	7.85274	8.2463
---	4.49428	5.11674	3.04067	4.3082	4.0451	5.10131	5.55256	5.35502	4.45286	4.50376	4.03325
---	4.49428	5.11674	3.04067	4.3082	4.0451	5.10131	5.55256	5.35502	4.45286	4.50376	4.03325
TGFBR2	10.0952	10.0129	8.52489	8.79461	8.32679	9.74596	10.1095	10.3836	9.49097	9.46005	9.58487
GLB1	6.49098	6.43402	7.87498	7.92508	7.80221	6.64096	6.07726	6.72376	7.18196	6.96567	6.93444
CDC37	7.25806	7.33693	7.93707	8.03972	8.18092	7.03352	7.30868	7.19452	8.39095	7.57546	7.5815
TTC26	4.09974	4.31429	3.6246	3.37565	3.49764	4.61623	7.19165	5.00766	3.96215	3.708	4.08538
PADI4	9.3382	9.66548	7.67954	7.91887	7.43947	9.68438	9.04202	9.56394	10.2319	9.80517	10.3391
SNORD57	8.29505	8.55278	6.88561	6.95683	7.58948	8.39573	8.79821	7.74369	7.47926	7.20817	7.60923
---	7.42063	7.13968	6.81804	6.6384	6.60917	6.43459	7.29128	7.30955	8.14732	7.47914	7.80885
PLAA	5.54299	5.85623	5.73464	6.2936	5.85445	5.24923	5.15428	5.28552	6.28225	5.69464	5.6635
MAST3	8.78787	8.99026	6.81267	7.04314	7.09091	8.83138	8.7087	9.10579	8.04183	8.34736	8.59952
MATR3	5.70547	5.48469	6.64928	6.3551	6.55235	5.52916	5.05412	5.40179	6.08388	5.97827	5.60486
TMEM110-MUSTN1	4.95571	5.06284	5.99745	5.89303	5.94647	5.62077	5.76735	5.6687	6.98736	5.80852	7.55687
IP6K2	7.33004	7.57783	6.94326	6.99616	7.0076	7.44373	7.46888	7.71795	7.16877	7.22169	7.02066
LAMTOR2	6.35433	6.55766	7.88091	7.52462	7.90345	6.6281	6.51997	6.87693	7.40569	7.08975	7.07724
HCP5	8.5085	8.35636	6.98074	6.92851	6.99947	7.96298	7.7393	8.07455	5.83266	7.08492	7.54109
ZBP1	7.33686	7.86546	5.07464	5.97085	5.53141	7.64904	8.33863	7.94666	6.50982	7.22727	7.33505
---	5.26827	5.37557	3.85529	3.13415	3.95746	5.28691	4.58494	4.35734	3.87876	4.06244	3.69597
MGAT5	6.06276	5.83449	5.37693	5.05017	5.04903	5.61386	5.47159	5.50192	5.9109	6.009	5.92105
IL13RA1	8.93916	8.26898	7.79857	7.56344	7.62095	9.00199	8.80611	8.77025	7.6122	8.11744	8.5425
DCAF15	6.87046	7.02306	6.14145	6.44459	6.45566	6.76958	6.85072	7.09206	6.47149	6.56643	6.01381
KIAA0368	5.28196	5.53057	6.91915	6.62949	6.54931	5.29101	5.99481	5.77923	6.83524	6.02187	6.48571
NRIP3	4.50154	4.44471	4.71886	5.16648	5.37333	3.38377	4.23276	3.52431	5.32185	5.03628	4.02768
RBM3	6.86472	6.69678	8.42479	8.12892	7.8961	6.42049	6.40056	6.4801	7.08119	6.98044	6.73348
KIAA1257	6.32605	6.37762	4.27416	4.12291	4.31978	6.1772	6.66899	6.32198	4.42849	5.68723	5.92523
TNRC6A	4.83125	5.29888	6.27587	6.44153	6.23665	5.17851	4.6359	5.0908	5.71358	5.36944	5.58258
PDHB	4.65878	4.87844	6.71035	6.93229	6.85953	4.78814	4.58237	5.14796	5.5199	5.14855	5.49546
SLIT1	4.34003	4.8933	3.97953	4.18022	4.11413	4.61709	4.77842	4.82203	4.29824	4.1067	4.31578
TBC1D3C	6.77309	6.92658	5.99697	5.8684	5.75999	7.03886	7.17246	7.07749	6.35091	6.69061	6.84814
FAM35DP	6.2899	6.14625	6.93186	6.94179	6.80357	5.8647	6.04612	6.17951	6.64809	6.41084	6.31881
HECTD1	5.79846	5.42108	6.62426	6.37929	6.43974	5.62498	5.14077	5.52521	5.9715	5.82177	6.08308
TMED9	6.68075	7.14067	8.15066	8.50584	8.17517	7.08597	6.61305	6.94068	7.50779	7.36453	7.43403
---	10.4097	10.4572	12.3312	12.3068	12.2854	9.72459	10.0627	10.1793	10.8328	10.6321	10.1942
ND2	5.60154	5.66374	6.75886	6.75126	6.64813	5.17192	5.7596	6.05034	6.19723	6.18839	6.70677
---	3.52464	3.65895	3.51872	3.23048	3.32665	3.90084	3.49044	3.595	3.10118	3.27523	3.25246
ZFAND6	7.52984	7.38099	6.81189	6.8875	6.76445	7.88283	7.7216	7.7778	7.53125	7.21321	7.45789
TSN	6.38735	6.27822	8.01048	7.96294	7.67197	6.13358	5.89243	6.42706	7.77659	7.15476	6.38149
HAND2	3.18201	3.11307	3.21217	3.35794	2.97645	3.42141	3.64989	3.65538	3.25375	3.06865	3.11778
PYGL	10.2556	10.1472	8.81922	8.42365	8.53768	10.2802	10.323	10.6221	11.0601	10.65	11.3964
ZNF763	5.41464	5.51279	4.45288	4.2282	4.29244	5.95139	6.04735	6.00985	5.76601	5.36753	5.62021
SEC16A	6.36075	6.53571	6.37638	6.3595	6.36594	6.20646	6.27556	6.19516	7.07576	6.57078	6.50367
ATMIN	4.91451	4.57661	5.69499	5.57995	5.91629	4.79694	5.00624	4.53348	5.76585	5.33435	5.12368
ZNF274	6.46282	6.63945	5.26426	5.31734	5.30251	6.09708	6.43585	6.4794	5.74835	5.98297	5.97344
RSL24D1	4.91999	5.01689	6.77363	7.10686	6.74176	5.58215	4.91114	5.96692	6.75363	6.28881	5.99717
PHF19	5.73808	5.62641	6.45803	6.75268	6.84912	5.81637	5.73696	5.75489	6.55427	6.20454	6.04699
RPAIN	5.20127	5.2039	7.43978	7.00783	7.21023	5.28009	5.24139	5.17399	6.02674	6.10078	5.39059
FOPNL	4.80773	4.66583	6.1509	6.02562	6.20715	4.3581	4.48454	4.77147	5.21385	4.99751	4.82667
MRPL39	3.92291	3.81318	5.44909	5.68308	5.38376	3.66936	3.65611	3.22845	3.9228	4.20977	3.93252
---	4.02194	3.9873	3.79458	3.87047	3.80968	4.16481	4.18209	3.95809	3.60659	3.84294	3.74392
TRAM1	7.70308	7.67316	9.08744	9.20112	9.29462	7.56852	7.26417	7.74109	8.62353	8.12518	7.78829
ANP32E	5.28352	4.7897	5.08453	5.07717	5.57611	4.63258	4.83845	5.20585	5.83298	6.1015	5.21812
ZCCHC10	3.18568	3.4864	4.88812	3.98674	4.24029	2.69625	3.10626	3.37401	3.85172	3.71778	3.91031
IL6ST	5.63825	5.87069	8.10121	8.22916	8.15309	5.28447	6.15759	6.60102	7.44062	6.40305	7.76727
ASCC3	3.15735	3.10919	5.76954	5.47388	5.62284	3.1792	3.08083	3.15856	3.8803	3.47362	3.4391
PPP1R16B	5.1327	5.18243	5.05593	4.97969	4.86114	5.17661	5.35478	5.15472	4.72154	4.96207	4.86349
PHLDA2	5.94292	6.03908	5.7664	6.17153	5.94239	6.09633	6.14239	6.09192	5.7335	5.76297	5.63199
C19orf47	5.7021	5.6562	6.03746	5.65111	5.82299	5.28232	5.39737	5.40457	5.66187	5.74973	5.95092
---	7.24836	7.21602	6.43248	6.70512	6.66596	7.14938	7.55368	7.1348	6.83302	6.75387	6.88807
WDR70	4.32466	4.28538	6.31264	6.33186	6.08112	4.12652	4.21852	4.52368	6.09918	4.58217	5.14804
RPL21	8.11288	7.98876	10.0528	10.3288	10.4441	7.92893	7.60018	7.89839	8.52603	8.56964	8.02951
NMRK1	4.74499	4.18126	4.14566	4.11315	3.86753	3.25035	5.01788	5.26582	5.96029	5.76762	5.9189
RPL34P34	10.8445	10.8249	11.9162	11.8191	11.8035	10.5566	10.3018	10.345	10.7264	10.9217	10.6959
ACAA2	4.57115	4.82663	6.39718	7.35528	6.68339	4.38807	4.72523	4.64298	5.86064	5.47286	4.99759
LOC729603	8.92096	8.89852	6.27124	6.5474	5.88825	8.61152	9.02287	8.80153	7.19673	8.2148	8.31476
WWC1	3.8346	3.85237	3.64998	3.61637	3.66448	4.29295	4.15744	4.02467	3.2551	3.85247	3.81106
SLCO4C1	6.87846	6.08621	4.39463	3.7899	4.58739	6.44572	6.29053	7.11372	7.96479	7.11271	7.93718
CDADC1	6.02105	6.11242	5.09744	5.46239	5.36352	5.92159	5.33317	5.68233	7.35109	6.2074	6.17389
DYNC1I2	2.98983	2.74364	3.7763	3.7763	3.27311	2.44753	2.64052	2.40394	3.45503	2.7247	3.3414
RIPK3	6.76479	7.00807	5.86177	6.07053	6.22032	6.59879	7.08	6.91521	7.49635	7.198	7.47316
FAM19A3	4.33607	4.48549	4.27679	4.25063	4.1673	4.67641	4.76999	4.65851	4.01204	4.43444	4.37995
ZHX2	7.86422	8.27537	6.13534	6.25882	6.01386	7.92279	7.84999	8.202	7.10888	7.69843	7.43234
PIP5KL1	5.24599	5.26902	4.91204	4.99913	5.11652	5.58268	5.37788	5.3351	4.94219	5.15639	5.04711
STYXL1	7.10372	7.34504	7.49543	8.0295	7.82756	7.99544	7.79497	7.6757	7.52804	7.08055	7.1505
RPL36A	3.28426	3.46978	6.21044	6.07872	5.87883	3.00157	3.11872	3.28576	3.5556	3.7849	3.44283
IPMK	8.60538	8.76164	7.42459	7.31904	7.16247	8.67087	8.54648	8.99377	8.22786	8.0884	8.43383
---	7.7839	7.71579	7.21403	7.06244	6.87535	8.22341	8.13288	7.74413	7.6218	7.43674	7.59108
SLC26A9	3.84762	3.7672	3.28638	3.14519	3.35328	4.34509	3.82126	3.77175	3.46023	3.49865	3.48917
GLG1	7.46276	7.60581	8.24984	8.00551	8.19267	7.21141	7.12349	7.37535	8.06562	7.47037	7.71612
NUCB2	7.47206	7.00253	6.9876	7.44442	7.61335	7.22339	7.05749	7.72184	8.11503	9.44088	7.95017
JUNB	11.3778	11.5819	9.93391	10.1685	10.064	10.5057	11.3527	11.1924	10.1232	10.6092	10.2304
EDF1	7.645	7.79202	9.31036	9.21682	9.36717	7.46006	7.459	7.80013	8.4702	8.17444	7.77711
UQCC3	4.60996	4.83655	5.214	5.46752	5.19725	4.66321	4.79375	4.53029	5.195	4.90182	5.30788
HLA-DPA1	5.24154	4.64476	10.8845	11.7555	11.8956	5.5842	5.17711	7.47698	4.20358	4.51774	4.59639
---	5.498	5.99762	5.41921	5.54015	4.97423	5.95664	6.06228	5.92786	4.67106	5.71344	5.10858
TMEM167B	8.69752	8.93407	8.38754	8.31496	8.53112	8.5179	8.82392	8.74941	9.34299	9.2477	8.9264
TMEM167B	8.69752	8.93407	8.38754	8.31496	8.53112	8.5179	8.82392	8.74941	9.34299	9.2477	8.9264
SIK3	7.54673	7.84646	7.51008	7.71995	7.4829	7.55676	7.85478	7.82655	6.70212	7.31203	7.39261
---	8.83707	8.90516	7.88769	7.99192	8.21255	8.66636	8.29439	7.93887	7.61833	7.95873	7.22735
NPSR1	3.87183	3.79435	3.82864	3.47072	3.44244	4.47541	4.01393	4.13911	3.8727	3.58294	3.62614
MAPK6	3.3836	3.99639	5.30007	5.13989	4.23417	3.29025	3.48899	3.36975	4.78214	4.1403	4.05074
RPL37A	6.17259	6.09573	7.9867	8.14199	7.93633	6.13122	6.0091	6.2395	6.931	6.8574	6.25972
SPECC1	6.62303	6.9258	7.2225	7.24766	7.47179	6.18075	6.96625	6.71337	5.37075	6.34209	5.6377
PBLD	4.31564	4.36176	3.96462	4.45252	4.1354	4.3306	4.83137	4.57677	3.6582	4.15466	4.12097
RPL38	10.0035	9.90634	11.7638	11.7635	11.6491	9.68875	9.72039	9.98588	10.2779	10.3051	10.0366
CCNL2	6.55389	6.76599	6.67532	6.6997	6.98046	6.86908	6.5889	6.70723	6.24571	6.25539	6.38744
ADSS	7.11734	6.80706	6.8054	6.8414	6.84098	6.45325	5.23693	6.86794	7.19055	7.05563	7.57145
NSD1	7.05722	7.00857	6.78963	6.90421	7.1576	6.52315	6.71944	6.75687	7.21744	6.91404	7.22134
NAP1L4	6.5532	6.42535	6.76008	6.63052	6.53305	6.07389	6.27251	6.294	6.88929	6.52171	6.54387
FLJ30679	3.26988	3.49573	2.92741	3.01946	3.16914	3.69829	3.43975	3.48319	3.13189	3.04705	3.22223
ABHD17A	6.53277	6.67858	6.37854	6.55609	6.10017	6.60148	6.63399	6.71062	6.1568	6.35366	6.10135
---	4.81759	4.97124	7.14517	7.15294	6.7731	4.37801	4.74998	4.63998	5.15436	5.20462	4.9009
LOC100288254	2.35463	2.80734	1.8551	1.96881	2.11045	2.29571	2.22311	2.22776	1.77574	1.89483	1.76098
MBD5	6.28002	6.07146	5.87754	5.68898	5.82729	6.09722	5.93088	5.84441	6.68236	6.68673	6.11188
NSUN5P1	6.266	6.24421	6.7025	6.49657	6.6322	5.95396	5.95041	6.35659	6.38122	6.81122	6.54626
G6PC3	4.67113	4.92766	7.34607	7.62228	7.66793	4.99609	4.99047	4.77246	5.30751	5.91015	5.29408
---	7.35493	7.60653	5.90647	5.31048	5.66669	7.44208	6.77257	6.54212	5.73282	6.57652	5.62359
DXO	8.326	8.66638	7.10783	7.41785	7.04753	7.95378	8.19464	8.14339	7.40622	7.745	6.45185
---	3.78761	3.53093	3.50995	3.71293	3.73243	4.30391	4.04512	3.78944	3.71999	3.38315	3.50141
CWC27	4.00275	4.46521	6.22239	6.58278	6.84823	4.40666	4.5026	4.29215	5.25175	5.17923	4.71731
---	5.34248	5.77488	5.17862	4.75813	4.15119	5.77488	5.11445	5.36808	5.97473	7.066	6.31974
---	3.74768	3.65926	3.12734	3.09202	2.97236	3.41019	3.99056	3.51185	2.83672	2.93406	3.3824
NAPB	5.06283	4.68429	5.22245	5.52894	5.57023	4.71385	4.43681	4.83549	6.44022	5.42499	5.03404
RRAGB	4.05706	4.46331	4.76622	5.30044	5.17512	4.5526	4.20243	4.58314	5.7639	4.82273	5.11155
SLC29A4	5.23154	5.24921	4.20051	4.45969	4.37728	5.67005	5.69288	5.24855	5.17338	4.9364	5.10012
PTPN12	8.00813	7.96521	7.26905	6.89417	7.00701	8.36356	8.05224	8.13255	7.79156	7.80329	7.66523
ADAMTS12	3.30305	3.55781	3.54136	3.56731	3.38234	3.82225	3.54691	3.57609	3.22997	3.16436	3.32726
CDK5RAP1	5.85674	5.55339	7.57743	7.76236	7.62788	5.4298	5.20699	5.45005	6.08777	5.92393	5.57493
CALHM2	6.04694	5.93608	7.8145	7.77567	7.75631	6.08796	5.83208	6.32818	5.72929	5.63882	5.58625
WDR77	5.01483	5.38806	6.63033	7.09122	6.94943	4.84847	4.66364	4.97134	5.67581	5.72302	5.05191
KLHL28	7.27539	7.60524	6.6581	6.85601	6.87408	6.55151	7.12775	7.09461	7.42193	7.8112	7.35595
CNNM3	5.48755	5.97741	5.04951	4.99765	4.96487	5.31017	5.74264	5.508	4.75221	4.99126	5.18146
ATP11C	5.26989	5.06994	5.45861	5.78788	5.55363	5.37331	5.15165	5.69031	6.15288	5.71203	6.01477
FAM83E	5.60261	5.81771	5.70004	5.75151	5.58359	6.06618	6.05785	5.76737	5.58615	5.65165	5.35058
NDEL1	9.6506	9.8505	7.57727	8.31438	8.08756	9.71044	9.99326	9.86527	8.85252	8.88779	9.59662
SLC3A2	6.10048	6.23754	7.39635	7.6532	7.863	5.6767	5.49848	5.84968	6.73187	6.40284	5.89492
MUT	4.93156	5.18827	5.75363	5.34718	5.8053	5.16269	5.24476	5.22089	5.88739	5.45231	5.88043
VPS25	6.47349	6.62634	7.69254	7.67111	7.65365	6.92888	5.88795	6.76281	7.9841	6.95676	7.42632
EML3	7.30018	7.25622	7.64443	7.4747	7.48629	6.88483	6.89499	7.25283	7.60357	7.27458	7.49458
LRWD1	7.39819	7.66445	5.63044	5.75317	5.81747	7.7203	7.8275	7.40804	6.48188	7.37931	7.05422
C8orf86	4.11752	3.74984	3.34248	3.44714	3.33641	4.02528	4.13626	3.90282	3.68219	3.63949	3.50053
PSRC1	5.28087	5.36185	5.31072	5.06097	5.50701	5.35487	5.75004	5.53675	4.96648	5.19319	5.04675
TTC9	7.05744	7.53586	6.23253	5.93713	6.09324	6.8321	6.61053	7.51143	6.13382	5.71921	6.55843
---	2.09692	2.36962	2.51521	2.51387	2.63655	2.4113	2.18785	2.55256	2.75855	3.10931	2.71736
FXYD5	6.66146	6.85634	8.30421	8.43447	8.84534	6.22197	6.70057	6.92767	7.40653	7.53485	6.99629
CCDC22	5.14265	5.0865	5.30076	5.75465	5.7106	5.12658	5.00801	5.14768	5.61461	5.46011	5.51734
FLJ37453	4.41983	4.97878	3.82155	3.93614	4.0998	4.31342	4.10786	4.40728	3.58279	3.9959	3.47165
TTLL5	5.90541	5.9654	6.1655	6.46663	6.67124	6.09879	6.30968	6.32083	5.65936	5.98655	5.4883
PDS5A	6.12269	5.48104	7.35997	7.33747	7.32072	5.86294	5.32798	5.86004	6.74771	6.24811	6.14937
TOMM40L	5.1188	4.9559	5.28396	4.99854	5.37555	4.87007	5.09903	5.01042	5.42603	5.82754	5.28909
GNG7	8.55487	7.69385	6.91334	6.64554	6.9999	8.01877	8.68483	9.18329	6.9835	8.17665	7.24828
---	3.51133	3.45884	3.66143	2.94796	3.55662	3.45266	3.51889	3.88626	4.86232	4.04885	6.35863
ZFP92	3.60647	3.84504	3.3981	3.71	4.12522	4.39879	4.05203	4.5157	3.61868	3.90176	3.51704
ATP11B	8.44625	8.19905	7.24145	7.23475	6.96176	8.54951	8.17577	8.76739	10.2077	8.73086	9.52252
TNFRSF10C	10.4046	10.7062	6.10486	6.3486	6.28753	10.3084	10.8476	10.7847	9.91906	10.112	10.2734
VBP1	4.71967	4.80528	5.32851	4.82962	5.29597	4.84004	5.223	5.37366	5.79856	5.48377	6.07617
ATG16L2	9.92445	9.85489	7.98085	8.04522	8.10789	9.72791	9.81514	9.92272	8.19894	9.38311	9.35638
KATNBL1	6.57322	5.89275	5.10247	5.20561	4.93744	6.50461	6.31542	6.72852	5.23143	6.15746	5.81595
METTL3	5.23667	4.96	7.2803	7.05999	7.40453	5.44739	5.15241	5.76182	6.45251	6.20085	5.72993
CST7	7.95132	7.72249	5.40737	6.2628	5.14113	8.78801	8.07539	9.43383	10.9891	9.40524	10.1313
---	5.9894	5.9178	5.53275	5.3614	5.39465	5.97883	6.00284	5.76218	5.37907	5.63039	5.57457
CLEC7A	8.20076	8.34469	7.52803	7.57999	7.26404	7.8019	8.38635	7.84648	6.03137	7.59554	7.20385
LILRA5	6.35508	6.85917	6.98227	7.66732	7.12305	6.81712	8.2918	8.49055	8.91737	9.02304	9.33343
RPSAP19	7.5481	7.31782	10.4662	10.4482	10.4727	6.75483	6.80888	7.58477	7.96343	8.86092	7.43187
CHMP4A	7.067	7.05262	8.1033	7.79975	7.85152	6.76218	7.03036	6.94216	7.30679	7.22489	7.40536
---	4.07033	3.70829	3.66149	3.59804	3.39366	3.80244	3.93516	3.63398	3.21661	3.48102	2.5016
TMEM54	5.10713	4.9945	4.64612	4.43272	4.72821	5.47369	5.30629	5.37402	4.40738	5.0428	5.03677
ZNF271P	5.14216	5.53174	5.85372	6.29651	5.79467	5.16671	5.43541	5.16482	6.03411	5.75851	5.66629
NUSAP1	4.59687	3.95386	4.52531	4.73593	4.3576	4.04534	4.03562	4.05517	4.38191	5.27835	4.68754
---	6.8293	6.95146	8.33686	8.79908	8.35208	6.64364	6.44898	6.74032	7.09263	7.08935	7.0427
---	8.21441	8.05921	9.77152	10.1817	9.89505	7.42183	7.67867	7.78307	8.22334	8.11197	7.96521
IMPAD1	2.80272	2.85534	5.73431	5.66307	6.28415	3.32623	2.53922	3.15757	4.65046	3.57742	3.6776
TIGAR	4.83297	4.41108	5.4624	5.35508	5.69698	4.61921	3.78862	3.26338	4.95869	4.49352	5.11871
ARHGAP11B	4.33961	4.77498	4.97185	4.92113	5.01178	4.23029	4.19906	3.64692	4.62252	4.72269	4.43552
AMIGO3	5.8011	5.65529	4.92966	4.84194	4.81823	5.56772	5.52856	5.20783	4.47321	5.12237	5.03005
SEC63	7.60484	7.37633	8.3879	8.1772	8.05219	7.42334	6.75488	7.44305	7.75719	8.04555	7.69295
SCPEP1	5.91195	6.30437	8.5539	8.47226	8.68329	5.94438	6.76809	6.7067	9.43975	7.05386	7.62096
AZI2	4.73099	5.19052	6.80306	6.91146	6.45432	5.09887	5.35447	5.37486	7.3513	5.36065	7.71524
APPL1	6.08765	5.734	7.90719	7.75399	7.75358	5.51788	6.00417	6.44991	7.49339	7.2229	6.2385
UQCRFS1	4.72409	5.25574	6.68102	6.66312	7.10325	5.3775	5.33912	5.97525	6.10655	6.27536	6.30466
---	4.27323	4.28842	4.41872	4.53417	4.552	4.48463	4.37245	4.28842	4.61907	4.99664	4.72518
CDX2	5.86837	5.91817	5.56617	5.38545	5.64644	6.5068	5.99014	6.12227	5.6444	5.80036	5.77785
---	8.48522	8.91074	7.21764	7.43189	7.3982	8.2817	8.8697	8.94303	7.63321	7.93433	8.37276
RNF185	6.23445	6.18626	5.25452	5.60804	5.76597	5.97208	6.62733	6.64677	5.76097	5.79013	5.85984
STAG2	7.57205	7.67706	6.62289	6.68797	6.59601	7.58995	7.72769	7.84145	7.19171	7.22121	7.53304
---	6.20557	6.45493	5.92064	6.14398	6.00806	6.08652	6.20371	6.2614	6.85165	6.5679	6.44844
PAN2	4.78078	4.39973	6.79201	6.16924	6.53648	4.73558	4.69782	4.48856	5.28328	5.15318	5.11931
SNORD13P1	6.7251	7.12444	4.82981	4.80476	3.88485	4.13082	3.95086	3.75389	2.29136	3.70109	2.15885
LAMP3	4.69622	5.21912	3.80078	3.84322	4.23256	4.92449	5.68511	5.11305	4.15702	4.89173	4.21912
LACTB	6.88202	6.49162	7.44823	7.36203	7.46158	7.07526	6.60573	6.85301	7.37258	7.25589	7.30888
PATL2	6.45512	6.75284	5.0526	4.26213	4.98581	6.80879	6.92399	6.45352	4.91784	6.12736	6.07115
VSIG8	5.16736	4.75255	4.50227	4.60812	4.83318	5.07654	5.00475	5.36486	4.64768	4.78987	4.47329
---	7.20243	7.06885	7.44965	7.11784	7.2413	6.96192	7.22167	6.86342	7.55898	7.36717	7.42444
NCBP1	6.00434	6.16573	7.53477	7.55543	7.62141	5.6918	5.55472	5.61141	6.47666	6.4828	5.70753
TRAV8-3	3.24797	3.43334	2.97813	3.04861	2.91885	3.25203	3.55426	3.28189	3.10663	2.84622	2.91399
ABCA13	5.44139	4.75276	3.31845	3.69943	3.69715	5.30005	4.71313	5.7863	5.55624	8.41686	7.33008
LETM2	6.43157	7.24817	5.485	5.38498	5.5707	6.66168	6.47906	6.98012	5.17249	5.76607	6.38278
---	5.29131	4.57137	4.32654	4.20195	4.53587	5.31823	5.04178	4.69989	4.27343	4.48916	4.32224
ZBTB40	3.9953	3.72132	6.19171	5.27261	5.96999	3.57572	3.89717	3.5273	4.55479	4.16145	4.4364
CHI3L1	10.7064	10.4894	4.61001	5.07443	4.57866	9.6577	10.5073	9.49205	5.68036	8.91828	8.57866
FCMR	7.57183	7.88481	4.27391	4.11713	4.76589	7.35843	6.94981	5.78964	5.2724	4.95016	6.10586
WIPF1	10.7981	10.884	9.46309	9.57509	9.59528	10.7098	11.0365	11.0287	9.92768	10.4722	10.6567
IER3IP1	3.95157	3.44787	5.38849	6.8818	6.04602	3.8294	3.46096	4.12066	4.69935	5.36078	4.67419
RBCK1	8.62683	8.83604	7.79082	7.70456	7.78433	8.74367	9.322	9.05613	8.12417	8.71888	8.54439
CIITA	5.06226	5.1722	5.60029	6.0047	5.76803	5.11076	5.45706	5.11636	4.91003	4.67964	4.69255
PTGDR2	5.56112	5.81529	5.37771	5.29195	5.34551	5.90285	5.77977	5.65478	5.51124	5.34949	5.33663
OR5AN1	3.36845	3.97281	2.86562	2.89105	3.16656	3.92432	3.32829	3.67799	2.98342	2.82972	3.20983
PPP3CB	6.22523	5.84412	7.06836	6.67199	6.96054	5.92234	5.82956	6.18462	7.08356	6.23066	6.67176
CCDC85C	5.2198	5.30278	4.62276	5.00178	4.36862	5.24339	5.30417	5.21671	4.80261	4.79025	4.74716
CAPN3	5.44643	5.0911	6.57643	6.44336	6.7845	5.21098	5.76353	5.2355	6.05866	5.73475	6.32719
---	5.07231	5.24143	5.01216	4.94517	5.11939	5.21757	5.17971	5.04343	4.95832	4.6827	4.43842
COG1	6.08594	6.19723	5.76494	5.75557	5.85502	5.63909	5.54685	5.41104	5.99295	5.96502	5.74885
NKX2-6	5.87659	5.68342	5.21841	4.93116	5.27449	5.8827	5.81179	5.8998	5.46865	5.56255	5.36127
XKR8	7.22988	7.06969	5.79941	6.00682	6.30016	7.10427	7.08326	7.31483	6.62417	6.84726	6.6194
---	4.55946	4.76449	4.03694	3.7476	4.1741	5.05335	5.06821	4.97841	4.57405	4.49796	4.73623
GPAT4	4.76805	5.61667	5.94978	6.0869	5.74075	5.51015	4.67705	5.40606	7.03887	6.32111	5.6161
GDPD3	7.5091	8.15953	5.88903	6.18285	6.11148	7.62209	8.19061	8.14488	6.9166	7.22028	7.61596
PFN1	9.7405	9.77353	9.60981	9.80348	9.62257	9.34995	9.50004	9.71068	10.0382	9.88718	9.83748
RAB11FIP2	6.76084	6.47369	7.04536	6.88106	7.15962	6.33936	5.82291	6.58846	7.20407	7.28425	6.51566
---	5.81091	5.94283	7.12638	7.38612	7.25738	5.41971	5.13143	5.47436	5.71228	7.04461	5.95676
MAN2B1	7.23408	7.12709	8.39274	8.60387	8.78219	6.27368	7.00269	6.93263	7.46094	7.98348	7.09467
C6orf163	3.53401	3.4261	3.157	3.28794	2.65937	4.37051	3.55969	5.00555	3.23826	3.51362	3.28676
AIMP1	3.8763	3.57232	5.73518	6.15677	5.57527	3.63114	3.60729	3.69216	4.49906	4.0996	4.02628
---	5.56767	5.80204	4.51096	4.67435	5.14896	6.87302	5.84699	6.11902	4.23498	5.34653	5.73393
B3GNTL1	5.45613	6.12481	4.77478	5.0067	4.19815	6.23878	6.34744	6.39333	5.68871	5.68252	5.55656
CTRL	6.75231	6.88158	5.73728	5.82457	5.83109	6.76797	7.24029	7.10648	5.96728	6.76678	6.51569
PSMC1	7.58439	7.59876	7.66871	7.66452	7.65419	7.35619	7.64244	7.502	8.32124	7.85407	7.76265
ADIPOR1	10.3839	10.1623	9.44482	9.79728	9.55512	10.3981	10.2276	10.4083	10.8936	10.6855	10.7114
ZBTB8OS	4.81564	4.44049	4.89412	4.71294	4.69339	4.79143	4.37303	4.47005	5.59819	4.83787	5.09775
[truncated: 27,185 more rows]

## Sheet: Text pg9 Fig 2D
Gene.Symbol	Probe.Set.ID	X10_S1_p1803.rma.gene.default.Signal	X11_S2_p1803.rma.gene.default.Signal	X12.S3_p1803.rma.gene.default.Signal	X1_HCN1_p1803.rma.gene.default.Signal	X2.HCN2_p1803.rma.gene.default.Signal	X3_HCN3_p1803.rma.gene.default.Signal	X4_HCMo1_p1803.rma.gene.default.Signal	X5_HCMo2_p1803.rma.gene.default.Signal	X6_HCMo3_p1803.rma.gene.default.Signal	X7_BC1_p1803.rma.gene.default.Signal	X8_BC2_p1803.rma.gene.default.Signal	X9_BC3_p1803.rma.gene.default.Signal	HCN1	HCN2	HCMo1	HCMo2	HCMo3	BC1	BC2	BC3	S1	S2	S3	HCMo-HCN_Limma.P.Value	HCMo-HCN_adj.P.Val	HCMo-HCN_logFC	BC-HCN_Limma.P.Value	BC-HCN_adj.P.Val	BC-HCN_logFC	BC-HCMo_Limma.P.Value	BC-HCMo_adj.P.Val	BC-HCMo_logFC	S-HCN_Limma.P.Value	S-HCN_adj.P.Val	S-HCN_logFC	S-HCMo_Limma.P.Value	S-HCMo_adj.P.Val	S-HCMo_logFC	S-BC_Limma.P.Value	S-BC_adj.P.Val	S-BC_logFC	Gene.Accession	Gene.Symbol	Gene.Description	Cytoband	mRNA.Accession	mRNA..Source	mRna...Description
[truncated: 9 more rows]
[truncated: 14 more columns]

[truncated: 6 more sheets: Text pg12-13 GSEA, Fig. 2A Heatmap, Fig. 2C Bar graph, Fig. 2D Volcano, Fig. 2B PCA, Suppl. Fig. 2C Heatmap]
